# Supplementary material
Source: publisher figshare collection journal article supplement (https://tandf.figshare.com/articles/dataset/_/1632842)
Supplement: Supplementary file 1 [file 1]

## Sheet: putative targets
Ensembl	Refseq	Gene	Best iCLIP peak p-value	Num. sig. iCLIP peaks, rep. 1	Num. sig. iCLIP peaks, rep. 2	Num. supporting iCLIP replicates	RIP corrected p-value	Putative target?
ENST00000311772,ENST00000236412,ENST00000373931,ENST00000431586,ENST00000486634	NM_001030891,NM_002713,NM_138558,NM_014110,NM_174582,NM_001243414,NM_001266462	PPP1R8	1e-300	3	1	2	1.62e-26	TRUE
UNKNOWN	NR_002834	DUSP5P	1e-300	14	9	2	2.2e-26	TRUE
ENST00000499732,ENST00000501122,ENST00000601801	NR_028272	NEAT1	1e-300	25	74	2	1.78e-43	TRUE
ENST00000516381,ENST00000589499,ENST00000516183,ENST00000516762,ENST00000516211,ENST00000516334	NR_003003	SCARNA17	1e-300	5	6	2	1.58e-22	TRUE
ENST00000413987,ENST00000447507,ENST00000437681	NR_002909,NR_036473,NR_036663,NR_038066,NR_038068,NR_038069	SNHG3	1e-300	8	14	2	2.38e-19	TRUE
ENST00000398958,ENST00000427469,ENST00000434290,ENST00000373833,ENST00000419074,ENST00000373832,ENST00000373831,ENST00000411533,ENST00000486790,ENST00000430407,ENST00000429051,ENST00000478232	NR_030725,NR_030726,NM_001269,NM_001048199,NM_001048194,NM_001048195,NM_001105408,NM_001205205,NM_001205208,NM_001205209,NM_001205211,NM_001205212,NM_001205213,NM_001205217,NM_001205223	RCC1	1e-300	10	19	2	3.31e-23	TRUE
ENST00000534336,ENST00000544868,ENST00000508832	NR_002819	MALAT1	1e-300	42	117	2	9.19e-29	TRUE
ENST00000366691,ENST00000473307,ENST00000493528	NM_001098147,NM_021205,NR_037962,NM_001265717	RHOU	1e-300	16	10	2	4.5e-35	TRUE
ENST00000355173,ENST00000556751,ENST00000443071,ENST00000553553,ENST00000556188,ENST00000554356,ENST00000557378,ENST00000554140,ENST00000554274,ENST00000554747	NM_020836,NM_001159531,NM_001075902,NM_001009766	BEGAIN	4.66e-14	104	84	2	0.00713437	TRUE
ENST00000367142,ENST00000464938	NM_213581,NM_022731,NM_001045920,NM_001244237,NM_001266481	NUCKS1	4.66e-14	8	7	2	8.04e-15	TRUE
ENST00000538758,ENST00000544257,ENST00000541044,ENST00000539923,ENST00000537189,ENST00000535829,ENST00000357529,ENST00000299673,ENST00000538135,ENST00000542232,ENST00000504495,ENST00000510357	NM_020734,NM_001076113,NM_001246515,NM_001260824	RIMKLB	4.66e-14	14	26	2	3.01e-07	TRUE
ENST00000217131,ENST00000503833,ENST00000488395,ENST00000472025	NM_001336,NM_001123104,NM_001077835	CTSZ	4.66e-14	19	14	2	4.01e-23	TRUE
ENST00000356205,ENST00000368623,ENST00000368621,ENST00000310483,ENST00000537590,ENST00000429040,ENST00000413622,ENST00000417348,ENST00000461071	NM_014437,NM_001035381,NM_001163600	SLC39A1	4.66e-14	2	4	2	2.85e-10	TRUE
ENST00000444757,ENST00000374675,ENST00000374677,ENST00000463972,ENST00000429042,ENST00000423043,ENST00000418477,ENST00000486338,ENST00000465516,ENST00000474514,ENST00000454420,ENST00000416369,ENST00000441854,ENST00000477713,ENST00000497713,ENST00000486222,ENST00000425069,ENST00000443773,ENST00000456261,ENST00000487655,ENST00000493496,ENST00000460361,ENST00000414757,ENST00000441953,ENST00000431735…	NM_001133689,NM_006979,NM_001077516,NM_001048100,NM_001131045,NM_001076237,NM_001163602,NM_001261144	SLC39A7	4.66e-14	7	10	2	9.6e-36	TRUE
ENST00000557515,ENST00000457657,ENST00000262710,ENST00000357481,ENST00000338631,ENST00000473758,ENST00000397341,ENST00000555053,ENST00000555478,ENST00000555395,ENST00000554680,ENST00000553790,ENST00000556052,ENST00000555566,ENST00000557039,ENST00000555807,ENST00000553721,ENST00000557432,ENST00000555352,ENST00000553501,ENST00000554979,ENST00000554708	NM_001164817,NM_001164815,NM_014977,NM_001164816,NM_001164814	ACIN1	4.66e-14	6	11	2	2.79e-20	TRUE
UNKNOWN	NR_037946	HNRNPUL2-BSCL2	4.66e-14	8	12	2	4.29e-33	TRUE
ENST00000451311,ENST00000380636,ENST00000380635,ENST00000380633	NM_001001315,NM_001132861,NM_021109,NM_001163948,NM_001141991,NM_001044555,NM_001002885,NM_001260557	TMSB4X	4.66e-14	3	1	2	1.99e-27	TRUE
ENST00000332598,ENST00000505521,ENST00000507723,ENST00000513799,ENST00000507578,ENST00000510499	NM_001193984,NM_017510,NM_001034812	TMED9	4.66e-14	9	7	2	2.78e-33	TRUE
ENST00000376281,ENST00000376263,ENST00000376264,ENST00000351839,ENST00000360384,ENST00000493362,ENST00000492865,ENST00000481820,ENST00000457156,ENST00000376256,ENST00000472778,ENST00000483135	NM_001133294,NM_031263,NM_031262,NM_002140,NM_001034562,NM_001082125,NM_001256548,NM_001266946,NM_001267845	HNRNPK	4.66e-14	8	5	2	9.8e-16	TRUE
ENST00000407472,ENST00000405640,ENST00000484072,ENST00000328554,ENST00000416337	NM_024627	C22orf29	4.66e-14	8	10	2	1.94e-06	TRUE
ENST00000340857	NM_001044673,NM_001134208,NM_005318,NM_001076487	H1F0	4.66e-14	5	2	2	2.56e-08	TRUE
ENST00000540973,ENST00000545256,ENST00000543234,ENST00000541756,ENST00000298229,ENST00000541544,ENST00000538751,ENST00000540329,ENST00000537656,ENST00000538339,ENST00000537755,ENST00000544806,ENST00000541303,ENST00000542295,ENST00000545355,ENST00000535985,ENST00000541752,ENST00000320683	NM_001567,NM_001190279,NM_001191176,NM_001260839	INPPL1	4.66e-14	10	12	2	0.000864465	TRUE
ENST00000602414,ENST00000602520,ENST00000602483,ENST00000602819,ENST00000602573	NR_034010,NR_003584,NR_034011	SNHG8	4.66e-14	3	2	2	4.1e-10	TRUE
ENST00000309311,ENST00000600794,ENST00000596417,ENST00000598182,ENST00000598436,ENST00000600720,ENST00000594885	NM_205368,NM_001185044,NM_001132075,NM_001961,NM_001075121,NM_001252603,NM_001265796	EEF2	4.66e-14	17	23	2	1.57e-09	TRUE
ENST00000381196,ENST00000537002,ENST00000397611,ENST00000397617,ENST00000355233,ENST00000358503,ENST00000360074,ENST00000356435,ENST00000540109,ENST00000486161,ENST00000397606,ENST00000477552,ENST00000471274,ENST00000488774,ENST00000463477,ENST00000481079	NM_130391,NM_130392,NM_002839,NM_130393,NM_001040712,NM_001171025,NM_001177530	PTPRD	4.66e-14	1	1	2	0.00211629	TRUE
ENST00000367187,ENST00000424712,ENST00000462752,ENST00000479079,ENST00000496872,ENST00000367184,ENST00000415899,ENST00000429009	NM_002646	PIK3C2B	4.66e-14	16	30	2	0.00398557	TRUE
ENST00000166139,ENST00000591552,ENST00000588773,ENST00000589185,ENST00000592947,ENST00000592058,ENST00000591573	NM_005860,NM_001075710	FSTL3	4.66e-14	24	13	2	2.86e-19	TRUE
ENST00000376441,ENST00000376444,ENST00000376425,ENST00000376423,ENST00000473581,ENST00000488361,ENST00000474512,ENST00000480041,ENST00000495258	NM_020137,NM_207672,NM_001193106	GRIPAP1	4.66e-14	1	4	2	1.4e-07	TRUE
ENST00000225726,ENST00000403162,ENST00000582252,ENST00000582331,ENST00000584112,ENST00000580986	NM_020198,NM_001035428,NM_001261244	CCDC47	4.66e-14	10	4	2	1.1e-21	TRUE
ENST00000301785,ENST00000540127	NM_001079559,NM_001206245	HNRNPUL2	4.66e-14	7	11	2	3.14e-36	TRUE
ENST00000329517,ENST00000403325,ENST00000405009,ENST00000460402,ENST00000481086,ENST00000453108	NM_001012793,NM_001190909,NM_053004,NM_001192340,NM_001243455	GNB1L	4.66e-14	8	11	2	0.00336498	TRUE
ENST00000227524,ENST00000540473,ENST00000535326,ENST00000539960,ENST00000539180,ENST00000541371,ENST00000546152	NM_001039331,NM_014502,NM_001128457,NM_001075640,NM_001261081	PRPF19	4.66e-14	3	4	2	1.47e-28	TRUE
ENST00000315792	NM_020130	C8orf4	4.66e-14	4	4	2	1.06e-19	TRUE
ENST00000447555,ENST00000349792,ENST00000409426,ENST00000368890,ENST00000441902,ENST00000424999,ENST00000368888,ENST00000454769,ENST00000418435,ENST00000468772,ENST00000461816,ENST00000481713,ENST00000486048,ENST00000464105,ENST00000414290,ENST00000486866,ENST00000460157,ENST00000489625	NM_001142440,NM_001136567,NM_001168949,NM_001137558,NM_003557,NM_001135638,NM_001135636,NM_001135637,NM_001136563,NM_001142399,NM_001103109,NM_001136559,NM_001244451	PIP5K1A	4.66e-14	6	17	2	7.62e-15	TRUE
ENST00000335044,ENST00000265529,ENST00000444589,ENST00000452770,ENST00000352910,ENST00000487440,ENST00000443784,ENST00000489391,ENST00000484629,ENST00000456548,ENST00000432493,ENST00000425853,ENST00000425452,ENST00000498584	NM_022342,NM_182902,NM_001134878,NM_001205640	KIF9	4.82e-14	2	3	2	0.00269507	TRUE
ENST00000343242,ENST00000403150,ENST00000406174	NM_204756,NM_002360,NM_001206300	MAFK	7.84e-14	33	31	2	7.67e-19	TRUE
ENST00000393432,ENST00000356731,ENST00000442819,ENST00000502904,ENST00000514332,ENST00000515481,ENST00000510411,ENST00000510678,ENST00000329433,ENST00000511300,ENST00000523449,ENST00000524179,ENST00000519033,ENST00000521720,ENST00000502632,ENST00000519958,ENST00000523136,ENST00000504549,ENST00000514731,ENST00000521173,ENST00000523921,ENST00000503105,ENST00000504779,ENST00000520415,ENST00000518548…	NM_204496,NM_005520,NM_001193234,NM_001257293	HNRNPH1	7.89e-14	18	18	2	5.54e-25	TRUE
ENST00000307630	NM_001031477,NM_001194436,NM_001133850,NM_012479,NM_174793	YWHAG	9.16e-14	16	15	2	1.42e-20	TRUE
ENST00000440854,ENST00000359715,ENST00000324228,ENST00000217224,ENST00000485858,ENST00000424545	NM_003224,NM_001134758,NM_001037607,NM_001162550,NM_001245541,NM_001267544,NM_001267545,NM_001267546,NM_001267547,NM_001267548,NM_001267549,NR_051955,NR_051954,NR_051956,NR_051957,NR_051958	ARFRP1	9.16e-14	7	3	2	1.14e-14	TRUE
ENST00000414069,ENST00000541506	NM_001194653,NM_001012508,NM_001080321,NM_001162561	SPRN	9.16e-14	3	2	2	1.12e-16	TRUE
ENST00000361756,ENST00000530058,ENST00000530655,ENST00000393711,ENST00000533380,ENST00000393713,ENST00000490867,ENST00000528683,ENST00000526549,ENST00000545854,ENST00000525243,ENST00000530137,ENST00000526903,ENST00000525176,ENST00000532379	NM_001194615,NM_018320,NR_024147,NR_024148,NM_001102245	RNF121	9.16e-14	3	8	2	6.26e-12	TRUE
ENST00000376395,ENST00000533705,ENST00000257468,ENST00000526134,ENST00000527373,ENST00000529923	NM_001134107,NM_053067,NM_013438,NM_174628,NM_001161886	UBQLN1	3.07e-13	1	1	2	0.000155741	TRUE
ENST00000462138,ENST00000423525,ENST00000460343,ENST00000423516,ENST00000450814,ENST00000461139,ENST00000296289,ENST00000469678,ENST00000460243,ENST00000472528,ENST00000494523,ENST00000466765,ENST00000487660,ENST00000483706	NM_001009097,NM_001133521,NM_001135055,NM_001064,NM_001112681,NM_001003906,NM_001258028,NR_047580	TKT	4.11e-13	27	37	2	1.53e-12	TRUE
ENST00000272233	NM_204909,NM_001194776,NM_004040,NM_001123189,NM_001077922,NM_001127673	RHOB	7.63e-13	6	6	2	2.97e-14	TRUE
ENST00000602812,ENST00000602420,ENST00000430772,ENST00000602576,ENST00000602776,ENST00000429124,ENST00000418855,ENST00000455395,ENST00000423992	NR_028379	FTX	1.04e-12	33	70	2	0.000380443	TRUE
ENST00000291577,ENST00000495007,ENST00000427803,ENST00000493883,ENST00000480786,ENST00000348499,ENST00000389690,ENST00000449622,ENST00000488392,ENST00000419699,ENST00000470545	NM_198155,NM_004649,NM_001162560	C21orf33	1.44e-12	3	3	2	2.76e-05	TRUE
UNKNOWN	NR_033738	LOC440300	1.44e-12	19	38	2	3.38e-06	TRUE
ENST00000533603,ENST00000358171,ENST00000526242,ENST00000526397,ENST00000530284,ENST00000525492,ENST00000529643,ENST00000532356,ENST00000524558,ENST00000528990,ENST00000533449,ENST00000525611,ENST00000528760,ENST00000525876,ENST00000526638	NM_001207014,NM_205291,NM_001131973,NM_001235,NM_001165888,NM_001046063,NM_001244132,NM_001246610,NM_001261087	SERPINH1	1.99e-12	11	6	2	2.47e-23	TRUE
ENST00000396821,ENST00000381633,ENST00000444597,ENST00000431312,ENST00000216019,ENST00000403230,ENST00000475004,ENST00000432525,ENST00000497196,ENST00000477112,ENST00000467279,ENST00000479734	NM_006386,NM_001098504,NM_001101993	DDX17	1.99e-12	16	13	2	1.29e-05	TRUE
ENST00000370187,ENST00000475200,ENST00000393441,ENST00000408038,ENST00000465182,ENST00000370183,ENST00000493877	NM_001131502,NM_033637,NM_003939,NM_001083475,NM_001256856	BTRC	2.39e-12	1	5	2	3.95e-06	TRUE
ENST00000378609,ENST00000461893,ENST00000471354,ENST00000439272,ENST00000434686,ENST00000437146,ENST00000472614	NM_001012835,NM_001133192,NM_002074,NM_001003236,NM_175777,NM_001265894	GNB1	2.76e-12	6	19	2	1.58e-20	TRUE
ENST00000588427,ENST00000436106,ENST00000588871,ENST00000427685,ENST00000592486,ENST00000588849,ENST00000586564,ENST00000590621,ENST00000592872,ENST00000585675,ENST00000591027,ENST00000592605,ENST00000589421,ENST00000589529	NM_152482	C19orf25	3.81e-12	3	8	2	0.00612243	TRUE
ENST00000397197,ENST00000439569,ENST00000359345,ENST00000372611,ENST00000372613,ENST00000302946	NM_144990,NM_001168247,NM_001246488	SLFNL1	3.81e-12	5	8	2	2.42e-11	TRUE
UNKNOWN	NR_037868	SLFNL1-AS1	3.81e-12	6	15	2	3.37e-15	TRUE
ENST00000371851,ENST00000371850,ENST00000406606,ENST00000486113,ENST00000472905	NM_204142,NM_001131389,NM_001134398,NM_003371,NM_001265633	VAV2	5.28e-12	72	123	2	2.85e-12	TRUE
ENST00000298130	NM_001193346,NM_138288,NM_001195042	SPTSSA	5.28e-12	6	13	2	8.46e-17	TRUE
ENST00000502346,ENST00000511450,ENST00000511118,ENST00000504622,ENST00000509770,ENST00000503892	NM_001113454,NM_174909,NM_001114511,NM_001245122	TMEM167A	6.15e-12	1	1	2	2.76e-12	TRUE
ENST00000555917,ENST00000361956,ENST00000381280,ENST00000553839,ENST00000557483	NM_001079771,NM_001034852,NM_022137	SMOC1	7.33e-12	12	44	2	2.68e-06	TRUE
ENST00000439211,ENST00000505337,ENST00000511032,ENST00000504396,ENST00000513048,ENST00000508282,ENST00000513314	NM_001006584,NM_000791,NM_001077883,NM_001244064	DHFR	7.33e-12	16	14	2	1.53e-07	TRUE
ENST00000312397,ENST00000529532,ENST00000532333,ENST00000530251,ENST00000528573,ENST00000533386,ENST00000529580,ENST00000528137	NM_005146,NM_001193086	SART1	1.02e-11	3	4	2	1.07e-07	TRUE
ENST00000225296,ENST00000433302,ENST00000575153,ENST00000572490,ENST00000574023	NM_020162,NM_001199699,NM_001034563	DHX33	1.41e-11	5	3	2	1e-10	TRUE
ENST00000421697,ENST00000381301	NR_033387	ADARB2-AS1	1.96e-11	40	42	2	2.64e-19	TRUE
ENST00000478117,ENST00000421561,ENST00000270747,ENST00000449495,ENST00000478210,ENST00000471928,ENST00000441785	NM_153213,NM_001206270	ARHGEF19	1.96e-11	2	5	2	5.87e-10	TRUE
ENST00000421337,ENST00000336967,ENST00000391771,ENST00000391770,ENST00000439000,ENST00000448420,ENST00000391769,ENST00000391768,ENST00000414489	NM_001133076,NM_138373,NM_001020819,NM_001020820,NM_001020818,NM_001020821,NM_001075252,NM_001171388	MYADM	1.96e-11	3	7	2	1.51e-05	TRUE
UNKNOWN	NR_027033	MIRLET7BHG	1.96e-11	74	81	2	0.00723923	TRUE
ENST00000327044,ENST00000483767,ENST00000477976,ENST00000496938,ENST00000487214,ENST00000469563	NM_001030876,NM_015658,NM_001034326	NOC2L	1.96e-11	3	7	2	9.25e-05	TRUE
ENST00000349830,ENST00000520359,ENST00000398560,ENST00000518288,ENST00000262112,ENST00000398564,ENST00000382795,ENST00000520972,ENST00000522969,ENST00000523711,ENST00000522435,ENST00000524212,ENST00000519641,ENST00000523596,ENST00000523980,ENST00000521927	NM_014629	ARHGEF10	2.72e-11	2	12	2	0.000235891	TRUE
ENST00000322611	NM_204116,NM_006317,NM_174780	BASP1	3.77e-11	13	23	2	5.14e-11	TRUE
ENST00000541468,ENST00000432615,ENST00000356309,ENST00000409423,ENST00000441982,ENST00000275830,ENST00000467785,ENST00000409339,ENST00000449727,ENST00000474940,ENST00000475918,ENST00000491792,ENST00000472591,ENST00000479022	NM_017760,NM_001192449,NM_001258148	NCAPG2	3.77e-11	5	23	2	6.11e-07	TRUE
ENST00000335007,ENST00000340766,ENST00000550261,ENST00000546904,ENST00000551582,ENST00000553024,ENST00000546933,ENST00000550991,ENST00000551676,ENST00000551690	NM_001006190,NM_002710,NM_001003033,NM_174581,NM_001244974,NM_001257831	PPP1CC	3.77e-11	3	3	2	2.91e-17	TRUE
ENST00000416426,ENST00000284073,ENST00000581776,ENST00000581523,ENST00000582453,ENST00000322684,ENST00000579590,ENST00000579531,ENST00000584476,ENST00000579483,ENST00000442934,ENST00000579180,ENST00000579205,ENST00000579505,ENST00000582772,ENST00000577241,ENST00000583705,ENST00000583821,ENST00000579466	NM_127230,NM_170721,NM_138962,NM_001206656	MSI2	1.02e-10	38	113	2	4.29e-33	TRUE
ENST00000546591,ENST00000501597,ENST00000546485,ENST00000358888,ENST00000546654,ENST00000552314	NM_001131169,NM_021104,NM_001035267,NM_001048157	RPL41	1.02e-10	3	1	2	3.35e-10	TRUE
ENST00000590550,ENST00000592012,ENST00000156825,ENST00000434436,ENST00000585903,ENST00000585967,ENST00000589064,ENST00000592361,ENST00000592965	NM_116266,NM_001079751,NM_001194043,NM_001131675,NM_003926,NM_001128505	MBD3	1.02e-10	4	10	2	5.47e-07	TRUE
ENST00000264018,ENST00000534980,ENST00000529162,ENST00000526070,ENST00000525082,ENST00000531971,ENST00000533239	NM_001006319,NM_001135499,NM_004397,NM_001143867,NM_001257191	DDX6	1.02e-10	5	2	2	8.04e-27	TRUE
ENST00000367816,ENST00000367815,ENST00000494797,ENST00000499679,ENST00000367813	NM_205520,NM_001195530,NM_001098555,NM_001132587,NM_001677,NM_001003283,NM_001001542,NM_001035334,NM_001009796,NM_001082073	ATP1B1	1.42e-10	4	11	2	3.5e-11	TRUE
ENST00000433297,ENST00000325110,ENST00000508319,ENST00000514610,ENST00000507004,ENST00000507293,ENST00000511774	NM_205411,NM_001134036,NM_001098272,NM_002130,NM_001206578,NM_001252215,NM_001260869	HMGCS1	1.96e-10	8	4	2	1.46e-21	TRUE
ENST00000254108,ENST00000566605,ENST00000380244,ENST00000487045,ENST00000487509,ENST00000568685,ENST00000487974,ENST00000570090,ENST00000474990,ENST00000568901,ENST00000564766,ENST00000569760,ENST00000483853	NM_001001531,NM_004960,NR_028388,NM_001170937,NM_001170634,NM_173912	FUS	2.73e-10	11	10	2	2.83e-40	TRUE
ENST00000306585,ENST00000448552,ENST00000523421,ENST00000518041,ENST00000519534,ENST00000574807,ENST00000398235,ENST00000519520,ENST00000567763,ENST00000522497,ENST00000520529,ENST00000522091	NM_001194148,NR_033227,NM_001039690,NM_001040146,NM_001114969	CHTF8	2.73e-10	1	1	2	3.85e-16	TRUE
ENST00000260641,ENST00000476840,ENST00000542850,ENST00000471552,ENST00000377982	NM_205224,NM_001133479,NM_001005386,NM_005722,NM_001134354,NM_001102213,NM_001266940	ACTR2	3.78e-10	9	8	2	1.67e-37	TRUE
ENST00000496484,ENST00000474866,ENST00000253686,ENST00000449354,ENST00000420267,ENST00000444840,ENST00000447299	NM_022497,NM_001075979,NM_001251923,NM_001257670	MRPS25	3.78e-10	13	11	2	5.18e-10	TRUE
ENST00000379719,ENST00000533233,ENST00000527431,ENST00000533680,ENST00000528833,ENST00000531235,ENST00000530037	NM_006391,NM_001192356	IPO7	3.78e-10	20	15	2	1.06e-06	TRUE
ENST00000441499,ENST00000425528,ENST00000356861,ENST00000450764,ENST00000589149,ENST00000592287,ENST00000588216,ENST00000587155,ENST00000585886,ENST00000587068,ENST00000589572,ENST00000588491,ENST00000589956,ENST00000588151,ENST00000586775,ENST00000588484,ENST00000587654,ENST00000589337,ENST00000590781	NM_013433,NM_001136195,NM_001136196,NM_001205503,NM_001261575	TNPO2	5.1e-10	10	13	2	1.67e-11	TRUE
ENST00000589046,ENST00000586933,ENST00000532141,ENST00000420450,ENST00000526123,ENST00000432005,ENST00000529555,ENST00000331800,ENST00000534729,ENST00000586646,ENST00000525851,ENST00000529989,ENST00000585396	NM_001194827,NM_003419,NM_001035327,NM_001242472,NM_001242474,NM_001242475,NM_001242476,NR_038362	ZNF345	5.23e-10	1	2	2	0.000727138	TRUE
ENST00000519973,ENST00000290075,ENST00000417331,ENST00000518881,ENST00000519192,ENST00000520654,ENST00000523930,ENST00000523883,ENST00000517923,ENST00000520949,ENST00000522164,ENST00000521637	NM_016612,NM_001102555,NM_001034549,NM_001127287	SLC25A37	7.24e-10	3	7	2	1.96e-05	TRUE
ENST00000384581	NR_002987	SNORA61	1.31e-09	1	2	2	1.77e-05	TRUE
ENST00000470977,ENST00000461448,ENST00000531126,ENST00000475441,ENST00000464612,ENST00000474814,ENST00000481368,ENST00000488745,ENST00000481220,ENST00000483436,ENST00000464115,ENST00000461832	NR_024127,NR_038147,NR_038148	SNHG12	1.31e-09	7	7	2	0.00553803	TRUE
ENST00000462214,ENST00000460734,ENST00000539173,ENST00000437626,ENST00000348831,ENST00000389863,ENST00000496664,ENST00000492414,ENST00000389861,ENST00000449478,ENST00000464215,ENST00000360697,ENST00000481022	NM_204240,NM_001111074,NR_004440,NM_001128632,NM_001161793,NM_001161794,NM_001161795,NR_027672,NR_027673,NR_027674,NM_001112,NM_015834,NM_001160230,NM_015833,NR_073200	ADARB1	1.33e-09	82	113	2	1.84e-33	TRUE
ENST00000465846,ENST00000476204,ENST00000474040,ENST00000467155,ENST00000480872,ENST00000429755,ENST00000492897,ENST00000487849,ENST00000481995,ENST00000474324,ENST00000460041,ENST00000477144,ENST00000466037,ENST00000491264,ENST00000494420	NR_033202,NR_033203,NR_033204,NR_033205,NR_033201	HOXB-AS3	1.39e-09	15	20	2	1.29e-15	TRUE
ENST00000484302,ENST00000225648,ENST00000470193,ENST00000490419	NM_018952	HOXB6	1.39e-09	15	19	2	5.97e-22	TRUE
ENST00000343289,ENST00000404739,ENST00000369857,ENST00000423468,ENST00000421281,ENST00000469228,ENST00000452156,ENST00000461461,ENST00000458345,ENST00000470228,ENST00000552185,ENST00000487810,ENST00000481549,ENST00000470299,ENST00000467380	NM_001031234,NM_001132349,NM_012229,NM_001134373,NM_174405,NM_001257875	NT5C2	1.93e-09	4	17	2	0.00281759	TRUE
ENST00000475078,ENST00000401088,ENST00000471507,ENST00000401089,ENST00000486763,ENST00000375590,ENST00000475554,ENST00000476423,ENST00000472351,ENST00000492354,ENST00000472461	NM_001114600,NM_015609	SZRD1	2.66e-09	2	11	2	8.63e-19	TRUE
ENST00000369842,ENST00000369835,ENST00000486738,ENST00000428228,ENST00000485261,ENST00000494443,ENST00000468294,ENST00000492448,ENST00000471965	NM_001168800,NM_000117,NM_203361,NM_001171372	EMD	3.65e-09	2	1	2	1.92e-10	TRUE
ENST00000354667,ENST00000476233,ENST00000360787,ENST00000463181,ENST00000356674,ENST00000490912,ENST00000495810	NM_001030985,NM_001133859,NM_002137,NM_031243,NM_001045975,NM_001265771	HNRNPA2B1	3.65e-09	19	18	2	4.1e-46	TRUE
ENST00000336761,ENST00000233078,ENST00000586579,ENST00000592522,ENST00000592453,ENST00000590419,ENST00000587833,ENST00000589484,ENST00000591830,ENST00000585485,ENST00000587079,ENST00000589874,ENST00000591999	NM_001031428,NM_170711,NM_018959,NM_001193031,NM_001244506	DAZAP1	3.65e-09	13	15	2	7.95e-20	TRUE
ENST00000264709,ENST00000321117,ENST00000380746,ENST00000380756,ENST00000402667,ENST00000474887,ENST00000482935,ENST00000491288,ENST00000466601,ENST00000461228,ENST00000474807,ENST00000484184,ENST00000470983,ENST00000496570,ENST00000406659	NM_001024832,NM_022552,NM_153759,NM_175629,NM_175630,NM_001097437,NM_001206502	DNMT3A	4.52e-09	11	41	2	1.96e-11	TRUE
ENST00000336314,ENST00000518297,ENST00000517616,ENST00000518892,ENST00000521577,ENST00000519931,ENST00000524248,ENST00000523163,ENST00000518194,ENST00000518595,ENST00000518742,ENST00000518677,ENST00000522272,ENST00000519194,ENST00000524187	NM_015315	LARP1	5e-09	7	27	2	0.000270115	TRUE
ENST00000496335,ENST00000350498,ENST00000426447,ENST00000488214	NM_014891,NM_001266283	PDAP1	5e-09	4	7	2	1.82e-37	TRUE
ENST00000380542,ENST00000469805,ENST00000469089,ENST00000526115,ENST00000492594,ENST00000526023,ENST00000492685,ENST00000528363,ENST00000483643,ENST00000528261,ENST00000532325,ENST00000448187,ENST00000399614,ENST00000430811,ENST00000529361,ENST00000528968,ENST00000530064,ENST00000526842,ENST00000531291,ENST00000455338,ENST00000534372	NM_001006469,NM_001131974,NM_005969,NM_001038094	NAP1L4	5e-09	6	13	2	1.84e-05	TRUE
ENST00000535458,ENST00000583648,ENST00000290158,ENST00000577918,ENST00000577875,ENST00000540627,ENST00000537679,ENST00000582097,ENST00000583013,ENST00000579901,ENST00000578718,ENST00000580019,ENST00000580573,ENST00000580158,ENST00000582126	NM_002265,NM_001193153	KPNB1	6.55e-09	5	10	2	2.22e-13	TRUE
ENST00000504986,ENST00000264452,ENST00000513702,ENST00000508448,ENST00000325094,ENST00000510383,ENST00000506794,ENST00000513558	NM_018126,NM_001244343,NM_001244344,NM_001261135	TMEM33	6.88e-09	3	1	2	6.78e-08	TRUE
ENST00000540342,ENST00000542092,ENST00000349767,ENST00000393592,ENST00000544437,ENST00000393591,ENST00000540124,ENST00000393590,ENST00000536225,ENST00000535931,ENST00000538328	NM_205195,NM_001133266,NM_176797,NM_176798,NM_004154,NM_176796,NM_001192295,NM_001244296	P2RY6	6.88e-09	28	44	2	2.03e-15	TRUE
ENST00000473757,ENST00000470714,ENST00000310771,ENST00000483329,ENST00000444874,ENST00000488972,ENST00000493499,ENST00000472646,ENST00000452089,ENST00000493091,ENST00000457519,ENST00000448382,ENST00000438028,ENST00000422808,ENST00000419749,ENST00000443526,ENST00000455145,ENST00000431140,ENST00000444073,ENST00000438231	NR_036569,NR_036570,NM_178238	PILRB	6.88e-09	34	40	2	4.64e-06	TRUE
ENST00000360214,ENST00000360938,ENST00000432278,ENST00000456966	NM_205312,NM_001133139,NM_005239,NM_001080214,NM_001256295	ETS2	9.52e-09	10	16	2	2.16e-07	TRUE
ENST00000300289,ENST00000469684,ENST00000538521,ENST00000434494,ENST00000446523,ENST00000455250,ENST00000497349	NM_204110,NM_001195716,NM_001168966,NM_001133778,NM_005313,NM_001195112,NM_174333,NM_001163045,NM_001171315,NM_001246452	PDIA3	9.94e-09	2	3	2	4.47e-26	TRUE
ENST00000401558,ENST00000428210,ENST00000481073,ENST00000404992,ENST00000406957,ENST00000461407,ENST00000492182,ENST00000494468,ENST00000469337,ENST00000460037,ENST00000475744,ENST00000437159,ENST00000489954,ENST00000451765,ENST00000443240,ENST00000476585,ENST00000468259,ENST00000420673,ENST00000422552,ENST00000457483,ENST00000481214,ENST00000495003,ENST00000449444,ENST00000436018	NM_001012869,NM_003400,NM_001192261,NM_001266844	XPO1	1.24e-08	21	15	2	1.6e-12	TRUE
ENST00000265293,ENST00000521089,ENST00000523043,ENST00000519859,ENST00000393895,ENST00000519659,ENST00000517425,ENST00000524228,ENST00000517646,ENST00000522660,ENST00000518334,ENST00000524093,ENST00000524038,ENST00000522140,ENST00000521391,ENST00000518204	NM_015238,NM_001161661,NM_001161662	WWC1	1.31e-08	6	41	2	1.4e-05	TRUE
ENST00000329493	NM_001135580	C19orf71	1.8e-08	26	18	2	1.2e-05	TRUE
ENST00000447866,ENST00000468479,ENST00000461507,ENST00000467076,ENST00000368356,ENST00000474345,ENST00000471117,ENST00000495308,ENST00000491013,ENST00000487002,ENST00000356657,ENST00000465559,ENST00000470171,ENST00000489003,ENST00000477057,ENST00000492887,ENST00000492244,ENST00000490140,ENST00000489324	NM_001132148,NM_002004,NM_001135821,NM_001135822,NM_001185131,NM_177497,NM_001242824,NM_001242825	FDPS	1.8e-08	20	5	2	0.00508768	TRUE
ENST00000270115	NM_198075	LRRC56	1.8e-08	1	1	2	0.000828766	TRUE
ENST00000580888,ENST00000584054,ENST00000380512,ENST00000293831,ENST00000396527,ENST00000578495,ENST00000578754,ENST00000582169,ENST00000578476,ENST00000584712,ENST00000580461,ENST00000580886,ENST00000579139,ENST00000581544,ENST00000584901,ENST00000583802,ENST00000585024,ENST00000582848,ENST00000583899,ENST00000582213,ENST00000579085,ENST00000577269,ENST00000584784,ENST00000582746,ENST00000584860…	NM_112246,NM_001035616,NM_001084679,NM_001098575,NM_001133307,NM_001416,NM_001204510,NM_001100196,NM_001034228,NM_001205137,NM_001202956,NM_001251942	EIF4A1	3.17e-08	11	10	2	4.3e-05	TRUE
ENST00000579777	NR_037926	SENP3-EIF4A1	3.17e-08	12	14	2	7.81e-08	TRUE
ENST00000314940	NM_006805,NM_001266639	HNRNPA0	3.42e-08	3	2	2	4.02e-24	TRUE
ENST00000557016,ENST00000216520,ENST00000557697,ENST00000555373	NM_001006475,NM_004450,NM_001185163,NM_001034336,NM_001260564	ERH	3.42e-08	4	3	2	1.57e-31	TRUE
ENST00000298281,ENST00000530660,ENST00000530304,ENST00000533018,ENST00000526160,ENST00000530906,ENST00000528336	NM_015885,NM_001180536	PCF11	4.69e-08	11	9	2	1.49e-11	TRUE
ENST00000438926,ENST00000566786,ENST00000262502,ENST00000563236,ENST00000569002,ENST00000563352	NM_001132018,NM_001126108,NM_000339,NM_001126107,NM_001206178	SLC12A3	4.69e-08	9	8	2	4.14e-08	TRUE
ENST00000546296,ENST00000542830,ENST00000539925,ENST00000228918,ENST00000536876,ENST00000535739,ENST00000543190,ENST00000545445,ENST00000544454,ENST00000541102,ENST00000440421,ENST00000444814,ENST00000541005,ENST00000543542,ENST00000441074	NM_001131504,NM_002342,NM_001270987,NM_001103228,NM_001265736,NM_001267705	LTBR	4.69e-08	1	2	2	9.12e-11	TRUE
ENST00000265339,ENST00000510021,ENST00000511807,ENST00000506787,ENST00000507277,ENST00000504431,ENST00000499038,ENST00000503080	NM_001194433,NM_003337,NM_001037459,NM_001082296,NM_001257356	UBE2B	6.05e-08	1	2	2	8.29e-23	TRUE
UNKNOWN	NR_036515	LOC284454	6.05e-08	7	7	2	5.93e-12	TRUE
ENST00000591369,ENST00000585328,ENST00000389840,ENST00000590227,ENST00000586052,ENST00000591647,ENST00000586850,ENST00000592192,ENST00000592152,ENST00000587177,ENST00000589793	NM_173628	DNAH17	6.45e-08	4	16	2	0.000486529	TRUE
ENST00000502751,ENST00000368301,ENST00000495341,ENST00000470835,ENST00000515711,ENST00000347559,ENST00000361308,ENST00000368300,ENST00000478063,ENST00000470199,ENST00000469565,ENST00000368299,ENST00000502357,ENST00000448611,ENST00000515459,ENST00000368297,ENST00000504687,ENST00000473598,ENST00000392353,ENST00000515824,ENST00000496738,ENST00000368298,ENST00000498722,ENST00000508500,ENST00000459904…	NM_205287,NM_001098554,NM_170707,NM_005572,NM_170708,NM_001111257,NM_001034053,NM_001257374,NR_047544,NR_047545,NM_001257893	LMNA	6.45e-08	7	20	2	9.29e-05	TRUE
ENST00000591517,ENST00000593196,ENST00000586296,ENST00000589130,ENST00000396857,ENST00000591210,ENST00000591921,ENST00000588938,ENST00000423454,ENST00000585583,ENST00000589002,ENST00000592888,ENST00000591707,ENST00000592225,ENST00000588083,ENST00000587300	NM_007181,NM_001042600,NM_001075825	MAP4K1	6.45e-08	1	2	2	0.00400502	TRUE
ENST00000455789,ENST00000310015,ENST00000416195,ENST00000418194,ENST00000465379,ENST00000462904,ENST00000483084,ENST00000490182	NM_204603,NM_001159789,NM_003111,NM_001172712,NM_001017371	SP3	8.83e-08	2	3	2	0.00159878	TRUE
ENST00000370310	NM_001133151,NM_001006605,NM_001083500,NM_001252269,NM_001252270,NM_001252271,NM_001252273,NM_001266885	FAM69A	8.83e-08	6	3	2	4.27e-07	TRUE
ENST00000565493	NR_027451	LINC00657	8.83e-08	12	12	2	3.45e-21	TRUE
ENST00000375856	NM_003749	IRS2	1.21e-07	4	6	2	0.000638542	TRUE
ENST00000559194,ENST00000281282,ENST00000557813	NM_032866,NM_001252335	CGNL1	1.41e-07	1	2	2	1.4e-17	TRUE
ENST00000473118,ENST00000240185,ENST00000476201,ENST00000472476,ENST00000439080,ENST00000473869,ENST00000315091,ENST00000477447,ENST00000496840,ENST00000480464	NM_001030878,NM_001134125,NM_007375,NM_001046485	TARDBP	1.51e-07	5	4	2	3e-40	TRUE
ENST00000346178,ENST00000532402,ENST00000356638,ENST00000540002,ENST00000528503,ENST00000534779,ENST00000540933,ENST00000531563,ENST00000531841,ENST00000526732,ENST00000534422,ENST00000534613,ENST00000525994,ENST00000524437,ENST00000526210,ENST00000526392,ENST00000529737,ENST00000534419	NM_001194711,NM_198335,NM_198334,NM_213904,NM_001205777	GANAB	1.66e-07	9	5	2	3.61e-05	TRUE
ENST00000589897,ENST00000344824,ENST00000538887,ENST00000586499,ENST00000586833,ENST00000588507,ENST00000300933,ENST00000587201,ENST00000588410,ENST00000590180,ENST00000588483,ENST00000592138,ENST00000588032,ENST00000586193,ENST00000591645,ENST00000592822,ENST00000591226	NM_003290,NM_001145160,NM_214335,NM_001101162	TPM4	1.66e-07	4	11	2	0.00630296	TRUE
ENST00000537090,ENST00000321264,ENST00000403782,ENST00000436747,ENST00000342518,ENST00000400769,ENST00000463932,ENST00000437164,ENST00000454048,ENST00000417686,ENST00000432449,ENST00000496252,ENST00000467427,ENST00000486953,ENST00000470343,ENST00000473126,ENST00000468064,ENST00000445308	NM_152783,NM_001075978	D2HGDH	1.66e-07	4	11	2	6.5e-19	TRUE
ENST00000290943,ENST00000496561,ENST00000474881,ENST00000484634,ENST00000357927,ENST00000426460,ENST00000465094	NM_001244752	ANKRD18B	1.66e-07	3	3	2	4.06e-16	TRUE
UNKNOWN	NR_036536,NR_003141,NR_038087,NR_038102	SNHG4	1.66e-07	12	13	2	8.28e-05	TRUE
ENST00000338086,ENST00000319801,ENST00000361078,ENST00000440577,ENST00000536417,ENST00000403432,ENST00000442400,ENST00000420234,ENST00000429419,ENST00000432105,ENST00000446940,ENST00000424110	NM_128475,NM_001039292,NM_015317,NM_001202701	PUM2	1.66e-07	5	11	2	1.03e-09	TRUE
ENST00000593240,ENST00000542809,ENST00000421905,ENST00000221462,ENST00000544069,ENST00000496125,ENST00000544897,ENST00000545910,ENST00000422370,ENST00000540059	NM_001105379,NM_019121	PPP1R37	1.66e-07	2	9	2	1.33e-16	TRUE
ENST00000258729,ENST00000421467,ENST00000498363,ENST00000467592,ENST00000497563,ENST00000480547,ENST00000495009,ENST00000468263,ENST00000492771,ENST00000479504,ENST00000466809,ENST00000491719,ENST00000465058,ENST00000469723,ENST00000474105,ENST00000476938,ENST00000468005	NM_001006359,NM_006547,NM_001192288	IGF2BP3	1.66e-07	7	41	2	0.00630985	TRUE
ENST00000367879,ENST00000372212,ENST00000462329,ENST00000464197,ENST00000469256,ENST00000470820,ENST00000463772,ENST00000479872,ENST00000475333	NM_001160071,NM_012474,NM_001192812,NM_001160034,NM_001265960	UCK2	1.75e-07	1	19	2	0.00170072	TRUE
ENST00000549334,ENST00000299767,ENST00000548622,ENST00000540297,ENST00000548462,ENST00000550479,ENST00000551983,ENST00000552051,ENST00000550595	NM_204289,NM_001195524,NM_001134101,NM_003299,NM_001003327,NM_214103,NM_174700,NM_001246487	HSP90B1	2.08e-07	7	6	2	3.13e-06	TRUE
ENST00000579335	NR_037425	MIR3652	2.08e-07	3	2	2	4.61e-26	TRUE
UNKNOWN	NR_024420	LOC389634	2.27e-07	1	7	2	0.007002	TRUE
UNKNOWN	NR_047662	LOC729732	2.27e-07	11	44	2	2.11e-05	TRUE
ENST00000540687,ENST00000566220,ENST00000519077,ENST00000521091,ENST00000569149,ENST00000563812,ENST00000602393,ENST00000602971,ENST00000569384	NR_002323	TUG1	2.27e-07	4	3	2	2.86e-05	TRUE
ENST00000409185,ENST00000389915	NM_001194008,NM_001009993,NM_001109790	FAM168B	2.27e-07	2	12	2	5.01e-16	TRUE
ENST00000259874,ENST00000376377,ENST00000416336,ENST00000439190,ENST00000429592,ENST00000416884,ENST00000436988,ENST00000450236,ENST00000400509,ENST00000383560,ENST00000446599,ENST00000435856	NM_001047122,NM_001045501,NM_003897,NM_001075202	IER3	2.27e-07	2	1	2	9.32e-11	TRUE
ENST00000482825,ENST00000561294,ENST00000271688,ENST00000368954,ENST00000560793,ENST00000345896,ENST00000460664,ENST00000368949,ENST00000496562,ENST00000361419,ENST00000559660,ENST00000558062,ENST00000559020,ENST00000421609,ENST00000457392	NM_181746,NM_022075,NM_001034667	CERS2	2.27e-07	4	5	2	2.04e-08	TRUE
ENST00000450554,ENST00000308924,ENST00000588850,ENST00000587196,ENST00000592867,ENST00000592874,ENST00000590551,ENST00000587275	NM_007279,NM_001012478,NM_001075336	U2AF2	2.27e-07	5	7	2	7.44e-25	TRUE
ENST00000375068,ENST00000375053,ENST00000347546,ENST00000463787,ENST00000375062,ENST00000343474,ENST00000218439,ENST00000375060,ENST00000375058,ENST00000396224,ENST00000485483,ENST00000497484,ENST00000487482,ENST00000487463	NM_001131194,NM_201222,NM_177433,NM_014599,NM_001075665,NM_001257614	MAGED2	2.48e-07	2	1	2	3.8e-16	TRUE
ENST00000588240,ENST00000590273,ENST00000592969,ENST00000592237,ENST00000590051,ENST00000591957,ENST00000587272,ENST00000588441,ENST00000311979,ENST00000591527,ENST00000591763,ENST00000586970,ENST00000585577,ENST00000586593,ENST00000586104	NM_139215,NM_003487,NM_103914	TAF15	2.48e-07	5	15	2	2.04e-42	TRUE
UNKNOWN	NR_030728	LOC440910	3.11e-07	24	25	2	4.27e-11	TRUE
ENST00000534733,ENST00000531217,ENST00000227495,ENST00000444328,ENST00000356132,ENST00000530591,ENST00000534083,ENST00000528605,ENST00000526311,ENST00000528858,ENST00000534452,ENST00000392669,ENST00000526756,ENST00000526727,ENST00000449406,ENST00000532243,ENST00000534457,ENST00000524834,ENST00000524860,ENST00000533826	NM_001037313,NM_001131674,NM_006278,NM_213757,NM_205806,NM_001112818,NM_001082051,NM_001254757,NM_001254758,NM_001254759,NM_001266675	ST3GAL4	3.11e-07	33	35	2	2.31e-15	TRUE
ENST00000409245,ENST00000319190,ENST00000461601,ENST00000536057,ENST00000394850,ENST00000263737,ENST00000441914,ENST00000409825,ENST00000474321,ENST00000491786,ENST00000484061,ENST00000440051,ENST00000484337,ENST00000496991	NM_001031055,NM_020458,NM_001205500	TTC7A	3.11e-07	8	45	2	7.78e-05	TRUE
ENST00000262056,ENST00000551527,ENST00000549077,ENST00000549645,ENST00000420463,ENST00000551002,ENST00000416762,ENST00000550704,ENST00000549481,ENST00000552490,ENST00000550390,ENST00000550025,ENST00000553209,ENST00000549592	NM_001195808,NM_001417,NM_001035028	EIF4B	3.11e-07	4	9	2	3.26e-08	TRUE
ENST00000420190,ENST00000437963,ENST00000342066,ENST00000341065,ENST00000455979,ENST00000478729,ENST00000474461,ENST00000466827,ENST00000464948	NM_001030877,NM_152486	SAMD11	4.24e-07	8	12	2	0.0041408	TRUE
ENST00000252593,ENST00000533098,ENST00000527220	NM_001161666,NM_001190480,NM_001172587,NM_004335,NM_001161755,NM_001243085	BST2	4.24e-07	6	2	2	6.5e-33	TRUE
ENST00000294964,ENST00000401498,ENST00000485578,ENST00000492861,ENST00000475868,ENST00000475241,ENST00000490302,ENST00000470578,ENST00000480099	NM_138370,NM_001206721	PKDCC	4.37e-07	14	18	2	1.29e-05	TRUE
ENST00000491289,ENST00000344469,ENST00000343730,ENST00000486395,ENST00000476080,ENST00000471524,ENST00000371999,ENST00000446777,ENST00000494177,ENST00000457204,ENST00000482295	NM_001045830,NM_001194184,NM_001034742,NM_130514,NM_181491,NM_133640	MED22	5.77e-07	4	6	2	4.55e-06	TRUE
ENST00000288840,ENST00000457357,ENST00000557916,ENST00000338426,ENST00000559931,ENST00000558937	NM_204248,NR_027654,NM_005585,NM_001142861,NM_001206145	SMAD6	5.77e-07	14	23	2	5.9e-12	TRUE
ENST00000483871,ENST00000244020	NM_001030843,NM_001195568,NR_034009,NM_006275,NM_001077217,NM_001035272	SRSF6	5.77e-07	7	8	2	7.82e-07	TRUE
ENST00000314138,ENST00000531978,ENST00000530585,ENST00000529227,ENST00000524496,ENST00000532359,ENST00000534599,ENST00000530022,ENST00000526562,ENST00000525981,ENST00000530913,ENST00000531102	NM_001193567,NM_001034084,NM_001131285,NM_000990,NM_001024471,NM_001179140,NM_001252225	RPL27A	7.74e-07	5	11	2	8.02e-05	TRUE
ENST00000578868,ENST00000321337,ENST00000429205,ENST00000583277,ENST00000580997,ENST00000580231,ENST00000580042,ENST00000578813,ENST00000581093,ENST00000582789,ENST00000581010	NM_001191374,NM_001205128,NM_001205134,NM_015670	SENP3	7.87e-07	1	4	2	5.45e-19	TRUE
ENST00000512364,ENST00000330025,ENST00000316310,ENST00000356333,ENST00000414076,ENST00000438003,ENST00000411516,ENST00000503775,ENST00000375473,ENST00000451084,ENST00000447562,ENST00000510517,ENST00000416923,ENST00000505988,ENST00000475552,ENST00000493931,ENST00000511863,ENST00000510893,ENST00000515858,ENST00000505062	NM_001193751,NM_014138,NM_001242489,NM_001242490,NM_001242491,NM_001242492,NM_001242493,NM_001242494,NM_001242495,NM_001242496,NM_001242497	FAM156A	7.87e-07	8	14	2	1.75e-06	TRUE
ENST00000317683,ENST00000586899,ENST00000591686	NM_001080469	FBXO46	7.87e-07	3	9	2	4.49e-11	TRUE
ENST00000373314,ENST00000373312,ENST00000478917,ENST00000468379,ENST00000484348,ENST00000465154,ENST00000476091	NM_001194039,NM_001035534,NM_022833	FAM129B	7.87e-07	9	28	2	1.36e-15	TRUE
ENST00000451137,ENST00000480413	NM_001031563,NM_001098553,NM_001554,NM_001034340	CYR61	8.31e-07	2	2	2	3.42e-20	TRUE
ENST00000494183,ENST00000399132,ENST00000512961,ENST00000399126,ENST00000399127,ENST00000505377,ENST00000505591	NM_032518,NM_198721,NM_001256074,NR_045756	COL25A1	9.55e-07	1	27	2	5.39e-06	TRUE
ENST00000456324,ENST00000591063,ENST00000586094,ENST00000443387,ENST00000587285	NM_001131124,NM_001099638,NM_007145,NM_001099639	ZNF146	1.07e-06	2	2	2	3.21e-13	TRUE
ENST00000528882,ENST00000358252,ENST00000532273,ENST00000532437,ENST00000427750,ENST00000530920,ENST00000527207	NM_033396	TNKS1BP1	1.07e-06	3	4	2	8.97e-17	TRUE
ENST00000601612,ENST00000594151,ENST00000600603,ENST00000601638,ENST00000598632,ENST00000221557,ENST00000601501,ENST00000594165,ENST00000598325,ENST00000391842,ENST00000599732,ENST00000601675,ENST00000602040,ENST00000596095,ENST00000594640,ENST00000600793,ENST00000600105,ENST00000597793,ENST00000595934,ENST00000596424,ENST00000601093,ENST00000597730	NM_017432,NM_001083780	PTOV1	1.07e-06	2	8	2	0.00191123	TRUE
ENST00000591668,ENST00000592642,ENST00000269383,ENST00000543309,ENST00000540128,ENST00000540812	NM_173547,NM_001256124	TRIM65	1.07e-06	4	7	2	6.01e-17	TRUE
ENST00000398092,ENST00000537495,ENST00000256682,ENST00000485410,ENST00000447318,ENST00000541959,ENST00000541236,ENST00000539611,ENST00000545855,ENST00000541967,ENST00000472621,ENST00000536283	NM_179726,NM_001084486,NM_001133245,NM_001659,NM_001160426,NM_001015571,NM_001162545,NM_001183513,NM_001247387	ARF3	1.07e-06	4	5	2	9.3e-18	TRUE
ENST00000263672,ENST00000530257,ENST00000526361,ENST00000532972,ENST00000527290,ENST00000528265,ENST00000527225,ENST00000526883	NM_001132151,NM_014752,NM_001003324,NM_001265830	SPCS2	1.07e-06	7	4	2	8.83e-37	TRUE
ENST00000410107,ENST00000489225,ENST00000488742,ENST00000498320,ENST00000474983,ENST00000397423,ENST00000495262,ENST00000475577,ENST00000489819,ENST00000474518,ENST00000483204,ENST00000379597,ENST00000485764,ENST00000461400,ENST00000316170,ENST00000459872,ENST00000265012	NM_001132592,NM_145649,NM_145655,NM_001491,NM_001101227	GCNT2	1.28e-06	5	16	2	4.35e-05	TRUE
ENST00000359707,ENST00000395719,ENST00000357854,ENST00000507133,ENST00000507947,ENST00000510902,ENST00000503660,ENST00000502654,ENST00000507745,ENST00000513927,ENST00000509100,ENST00000511146,ENST00000515457,ENST00000507252,ENST00000511868,ENST00000509561,ENST00000508510,ENST00000499709,ENST00000507701	NM_001132258,NM_203505,NM_012297,NM_203504,NM_001046455,NM_001261768	G3BP2	1.37e-06	1	4	2	1.53e-15	TRUE
ENST00000370355	NM_204890,NM_001132259,NM_005063,NM_213781,NM_173959,NM_001009254	SCD	1.45e-06	10	12	2	0.00444487	TRUE
ENST00000253001,ENST00000370915,ENST00000400318,ENST00000279068,ENST00000279069,ENST00000361670	NM_144703,NM_001261605	LSM14B	1.45e-06	2	8	2	5.09e-26	TRUE
ENST00000564978,ENST00000320805,ENST00000565919,ENST00000565752,ENST00000562977,ENST00000568998,ENST00000568148	NM_032815,NM_001098883,NM_001244522	NFATC2IP	1.45e-06	2	4	2	0.00028325	TRUE
ENST00000584689,ENST00000392341,ENST00000583237,ENST00000581642,ENST00000582743,ENST00000583444,ENST00000584781,ENST00000578684,ENST00000577650,ENST00000578574,ENST00000579572,ENST00000582715,ENST00000580098,ENST00000392339,ENST00000581287,ENST00000578522,ENST00000580189,ENST00000582946,ENST00000578810,ENST00000583025	NM_204663,NM_001131641,NM_001042422,NM_001042423,NM_004207,NM_001109980,NM_001206950,NM_001206951,NM_001206952	SLC16A3	1.68e-06	15	13	2	1.62e-09	TRUE
ENST00000370033,ENST00000495001,ENST00000456149,ENST00000311122,ENST00000470043	NM_001159813,NM_024541	C10orf76	1.68e-06	1	9	2	0.000114149	TRUE
ENST00000384033	NR_002325	SNORA6	1.88e-06	3	2	2	3.18e-05	TRUE
ENST00000265260,ENST00000498274,ENST00000460231,ENST00000469941,ENST00000296024,ENST00000486406,ENST00000470490,ENST00000465366	NM_001006253,NM_001131802,NM_020357,NM_001038205	PCNP	1.97e-06	1	5	2	1.92e-25	TRUE
ENST00000331762,ENST00000405709,ENST00000487733,ENST00000489381,ENST00000452895,ENST00000450877,ENST00000415362,ENST00000447215,ENST00000437687,ENST00000492938,ENST00000452753	NM_032549,NM_001077093,NM_001244606,NM_001261314	IMMP2L	1.97e-06	14	111	2	1.21e-06	TRUE
ENST00000596916,ENST00000595633,ENST00000262265,ENST00000596651,ENST00000600875,ENST00000598889,ENST00000593629,ENST00000594845,ENST00000597577,ENST00000598175,ENST00000602226,ENST00000602076,ENST00000596049,ENST00000601807,ENST00000601053,ENST00000596895,ENST00000595516,ENST00000599366,ENST00000597415,ENST00000593900,ENST00000595074,ENST00000599791,ENST00000601825,ENST00000595550	NM_001194666,NM_017916,NM_001075395,NM_001206970,NM_001244978	PIH1D1	1.97e-06	1	3	2	0.00513954	TRUE
ENST00000310137,ENST00000393979,ENST00000511114,ENST00000409372,ENST00000512283,ENST00000443702,ENST00000409738,ENST00000460762,ENST00000461478,ENST00000496694	NM_001131891,NM_001198836,NM_001198837,NM_006328,NM_001014901,NM_001244221,NM_001246382	RBM14	1.97e-06	5	4	2	0.0025964	TRUE
ENST00000378888,ENST00000378891,ENST00000472445	NM_001012430,NM_004421,NM_001206601	DVL1	1.97e-06	5	7	2	0.00904415	TRUE
ENST00000483560,ENST00000374274,ENST00000490561,ENST00000465030,ENST00000276105	NM_001031533,NM_001193757,NM_013346,NM_001103257,NM_001256185,NM_001256186,NM_001256187,NM_001256188	SNX12	1.97e-06	3	2	2	2.99e-25	TRUE
ENST00000247087,ENST00000482400,ENST00000374011,ENST00000487743,ENST00000490295,ENST00000480033	NM_001029882,NM_001206409	AHDC1	2.38e-06	2	12	2	1.77e-10	TRUE
ENST00000564414,ENST00000568056,ENST00000392476,ENST00000589827,ENST00000561721,ENST00000561633,ENST00000564509,ENST00000569632,ENST00000430767,ENST00000586429,ENST00000586390,ENST00000588880,ENST00000585618,ENST00000413679,ENST00000436233,ENST00000443798,ENST00000588696,ENST00000587820,ENST00000591786,ENST00000591437,ENST00000588616,ENST00000431431,ENST00000590483,ENST00000589202,ENST00000587821…	NM_001143998,NM_001143999,NM_003003,NM_001144001,NM_001039573,NM_001204408,NM_001204410,NM_001101975,NM_001258116	SEC14L1	2.54e-06	2	10	2	1.03e-11	TRUE
ENST00000280527,ENST00000426856,ENST00000428774,ENST00000473403,ENST00000497236,ENST00000477491,ENST00000481321,ENST00000413985	NM_204425,NM_016441,NM_001205298	CRIM1	2.67e-06	12	45	2	1.01e-08	TRUE
ENST00000426248,ENST00000389757,ENST00000389759,ENST00000457109,ENST00000452162,ENST00000479398,ENST00000411900,ENST00000421462,ENST00000462335,ENST00000481115,ENST00000494945,ENST00000492496,ENST00000480171,ENST00000495123,ENST00000483881,ENST00000486254	NM_001006529,NM_003628,NM_001005476,NM_001191491,NM_001266450	PKP4	2.67e-06	2	22	2	3.38e-07	TRUE
ENST00000400788,ENST00000367144	NM_001132508,NM_018452,NM_001046228	TMEM242	2.67e-06	3	7	2	2.19e-33	TRUE
ENST00000395264,ENST00000332578,ENST00000592650,ENST00000587863	NM_182973	TMPRSS9	2.67e-06	5	8	2	8.85e-26	TRUE
ENST00000419002,ENST00000382062,ENST00000460971,ENST00000487365,ENST00000236693,ENST00000349077,ENST00000416132,ENST00000418971,ENST00000438814,ENST00000403096,ENST00000402922,ENST00000404205,ENST00000402794	NM_001044665,NM_024027,NM_199235,NM_001076303,NM_001255982,NM_001255983,NM_001255984,NM_001255986,NM_001255985,NM_001255987,NM_001255988,NM_001255989,NR_045659	COLEC11	2.67e-06	1	2	2	0.00335656	TRUE
ENST00000375436,ENST00000474892,ENST00000375433	NM_018715,NM_001136204,NM_001101911	RCC2	2.67e-06	5	7	2	3.46e-07	TRUE
ENST00000360982,ENST00000361354,ENST00000477988,ENST00000478449,ENST00000471640,ENST00000492058,ENST00000493359,ENST00000495619	NM_013436,NM_205842,NM_001266519	NCKAP1	2.67e-06	1	6	2	4.36e-12	TRUE
ENST00000440960,ENST00000336990,ENST00000590956,ENST00000588729,ENST00000589565,ENST00000589952,ENST00000592149,ENST00000587862,ENST00000587735	NM_001031011,NM_001142405,NM_006553	SLMO1	2.67e-06	2	2	2	0.00228578	TRUE
ENST00000601065,ENST00000598441,ENST00000598984,ENST00000401730,ENST00000221448,ENST00000597936,ENST00000595231,ENST00000601411,ENST00000599687,ENST00000544278	NM_001194832,NM_003089,NM_001076046	SNRNP70	2.67e-06	2	4	2	1.56e-18	TRUE
ENST00000369109,ENST00000360244,ENST00000414276,ENST00000461320,ENST00000236017,ENST00000486308,ENST00000486720,ENST00000476538,ENST00000493092	NM_016022,NM_001077628,NM_001034670,NM_001243771,NM_001243772,NR_045033,NR_045034,NR_045035,NM_001244487,NM_001266040	APH1A	2.67e-06	6	2	2	7.95e-20	TRUE
ENST00000419616,ENST00000358015,ENST00000416373,ENST00000442587,ENST00000457811	NM_106614,NM_202452,NM_180651,NM_002874,NM_001046310,NM_001198510,NM_001244709,NM_001244713,NM_001244724,NM_001261788	RAD23B	3.29e-06	4	6	2	5.19e-25	TRUE
ENST00000583542,ENST00000582888,ENST00000322297,ENST00000602676,ENST00000581150,ENST00000590943,ENST00000592787,ENST00000588673,ENST00000593012,ENST00000586054,ENST00000589361,ENST00000592727,ENST00000589739	NM_204916,NM_001134900,NM_001127368,NM_004152,NM_001127234,NM_001122994,NM_001127243,NM_001172764,NM_001183866	OAZ1	3.39e-06	2	9	2	1.85e-08	TRUE
ENST00000579889,ENST00000362042,ENST00000584137,ENST00000585291,ENST00000357480,ENST00000585299,ENST00000583060,ENST00000361665,ENST00000579481,ENST00000582574,ENST00000585062,ENST00000581441,ENST00000583210,ENST00000579537,ENST00000577411,ENST00000584634,ENST00000580050,ENST00000582155,ENST00000583378,ENST00000536222,ENST00000577431,ENST00000580037,ENST00000581319	NM_001030756,NM_001132347,NM_003204,NM_001102515,NM_001261099	NFE2L1	3.6e-06	4	3	2	2.54e-15	TRUE
ENST00000258198,ENST00000379482,ENST00000443351,ENST00000563628,ENST00000569320,ENST00000567499,ENST00000564559,ENST00000568453,ENST00000564833,ENST00000565532,ENST00000570201,ENST00000440564,ENST00000561727,ENST00000566150,ENST00000568180,ENST00000564090	NM_001030573,NM_001131476,NM_006141,NM_001206152,NM_001243620	DYNC1LI2	3.6e-06	5	13	2	4.77e-32	TRUE
ENST00000329886,ENST00000427614,ENST00000455454,ENST00000432805,ENST00000551054,ENST00000392527,ENST00000443229,ENST00000421892,ENST00000334656,ENST00000451719,ENST00000392522,ENST00000392523,ENST00000460959,ENST00000354560,ENST00000546536,ENST00000463869,ENST00000548920,ENST00000450383,ENST00000551538,ENST00000546492	NM_001134875,NM_001134876,NM_001134877,NM_001198983	C14orf80	3.6e-06	1	1	2	1.05e-10	TRUE
UNKNOWN	NR_027412,NR_027413	LOC100130581	3.99e-06	1	3	2	1.99e-11	TRUE
ENST00000553781,ENST00000556100,ENST00000557008	NM_001199864	BCL2L2-PABPN1	4.75e-06	9	11	2	1.09e-40	TRUE
ENST00000216727,ENST00000397276,ENST00000556821,ENST00000556809,ENST00000557702,ENST00000554062,ENST00000553960,ENST00000555295	NM_004643,NM_174569,NM_001243548,NM_001130437	PABPN1	4.75e-06	6	7	2	4.13e-40	TRUE
ENST00000261313,ENST00000542939	NM_001198642,NM_001133443,NM_002567,NM_001048092,NM_001033623,NM_001082143,NM_001246199	PEBP1	4.88e-06	1	1	2	1.66e-17	TRUE
ENST00000377113	NM_001010911	C10orf114	4.88e-06	1	2	2	4.96e-10	TRUE
UNKNOWN	NR_024456	LOC100190986	4.88e-06	3	3	2	2.52e-06	TRUE
ENST00000420765,ENST00000396923,ENST00000334933,ENST00000360135,ENST00000360301,ENST00000381885,ENST00000381879,ENST00000348806,ENST00000488490,ENST00000439195,ENST00000437065,ENST00000432870,ENST00000462136,ENST00000488768,ENST00000469229,ENST00000465123,ENST00000427877,ENST00000476294,ENST00000472547,ENST00000453080,ENST00000417085,ENST00000429176,ENST00000431962	NM_001169075,NM_001130859,NM_014659,NM_001130858,NM_001190214,NM_001105354	PPIP5K1	4.88e-06	3	6	2	5.34e-05	TRUE
ENST00000525144,ENST00000529097,ENST00000416561,ENST00000532647,ENST00000526519,ENST00000525704,ENST00000526764,ENST00000533026,ENST00000547738,ENST00000549874	NM_001161707,NM_032531,NM_001078085	KIRREL3	5.11e-06	5	23	2	1.36e-15	TRUE
ENST00000363660	NR_001285	SNORD35B	5.84e-06	1	2	2	0.00771543	TRUE
ENST00000414287,ENST00000498829,ENST00000416411,ENST00000343999,ENST00000400023,ENST00000405854,ENST00000444628	NR_026997	C22orf34	5.99e-06	15	17	2	3.7e-20	TRUE
ENST00000495032,ENST00000434063,ENST00000429611,ENST00000425358,ENST00000428939,ENST00000593300	NR_038366,NR_038367	HOTAIRM1	6.59e-06	10	8	2	1.34e-26	TRUE
ENST00000372396,ENST00000463151,ENST00000485249,ENST00000472265,ENST00000481296	NM_001131648,NM_014663,NM_001206316	KDM4A	6.59e-06	2	10	2	8.17e-14	TRUE
ENST00000398804,ENST00000439057,ENST00000434346,ENST00000453015,ENST00000418149	NR_033827	KDM4A-AS1	6.59e-06	2	3	2	9.76e-15	TRUE
ENST00000344859,ENST00000362074,ENST00000369340,ENST00000479995	NM_203458	NOTCH2NL	6.71e-06	2	5	2	0.000196218	TRUE
ENST00000530122,ENST00000413559	NR_037945	STX16-NPEPL1	8.23e-06	2	11	2	9.32e-21	TRUE
ENST00000381786	NM_182626	C2orf48	8.23e-06	4	15	2	1.03e-05	TRUE
ENST00000361770,ENST00000355957,ENST00000458280,ENST00000312283,ENST00000412911,ENST00000371141,ENST00000359617,ENST00000460655,ENST00000476384,ENST00000483434,ENST00000496117,ENST00000490700,ENST00000371132,ENST00000496003,ENST00000467096,ENST00000358029,ENST00000361830,ENST00000464640,ENST00000493301,ENST00000468590,ENST00000435446,ENST00000438253	NM_001006295,NM_001133739,NM_001123199,NM_003763,NM_001134772,NM_001134773,NM_001204868,NR_037941,NR_037942,NR_037943,NM_001001433,NM_001257651	STX16	8.23e-06	2	9	2	7.07e-22	TRUE
ENST00000437901,ENST00000437362,ENST00000464190,ENST00000527359,ENST00000528084,ENST00000402363,ENST00000537798,ENST00000453748,ENST00000525515,ENST00000527470,ENST00000529333,ENST00000531532,ENST00000530840,ENST00000528238,ENST00000350030,ENST00000534101,ENST00000470768,ENST00000372052,ENST00000351223,ENST00000530073,ENST00000481782,ENST00000531612,ENST00000527932,ENST00000534450,ENST00000472408	NM_002482,NM_152298,NM_001195193,NM_001038088,NM_001082789	NASP	8.36e-06	2	5	2	3.82e-21	TRUE
ENST00000174618,ENST00000575374,ENST00000572892,ENST00000571232,ENST00000573384,ENST00000575394,ENST00000574559,ENST00000571836	NM_020310,NM_001206899	MNT	8.77e-06	5	6	2	0.00149644	TRUE
ENST00000395131,ENST00000374606,ENST00000395134,ENST00000374610,ENST00000374607,ENST00000491382,ENST00000463584,ENST00000445559,ENST00000452658,ENST00000458186,ENST00000448594,ENST00000547952,ENST00000462204,ENST00000491095,ENST00000412289,ENST00000425878,ENST00000432463,ENST00000442285,ENST00000552711,ENST00000476814,ENST00000474406,ENST00000431830,ENST00000432391,ENST00000448335,ENST00000451970…	NM_001194865,NM_001185181,NM_014260,NM_001048089,NM_001185180,NM_001185179,NM_001075421,NM_001265596,NM_001265595	PFDN6	8.9e-06	3	1	2	1.36e-44	TRUE
ENST00000375640,ENST00000375641,ENST00000375635,ENST00000375638,ENST00000375639,ENST00000375642,ENST00000395789,ENST00000375633,ENST00000395788,ENST00000424962,ENST00000456268,ENST00000458514,ENST00000433752,ENST00000435938,ENST00000549426,ENST00000550200,ENST00000430690,ENST00000436558,ENST00000456690,ENST00000439907,ENST00000444974,ENST00000439865,ENST00000444192,ENST00000423640,ENST00000413638…	NM_001040437,NM_001040438	C6orf48	8.9e-06	1	3	2	1.42e-08	TRUE
ENST00000392524,ENST00000411529,ENST00000435711,ENST00000432457,ENST00000483137	NM_001031253,NM_001131794,NM_194247,NM_001205429	HNRNPA3	8.9e-06	2	1	2	2.7e-50	TRUE
ENST00000262809,ENST00000594635,ENST00000596124,ENST00000594138,ENST00000599451,ENST00000596915	NM_001012847,NM_006532,NM_001192098	ELL	8.9e-06	5	6	2	2e-08	TRUE
UNKNOWN	NR_038955	LOC100506190	8.9e-06	2	11	2	4.48e-16	TRUE
ENST00000373573,ENST00000373583,ENST00000373589,ENST00000429103,ENST00000470998,ENST00000373568,ENST00000436675,ENST00000415409,ENST00000412342,ENST00000373571,ENST00000439122,ENST00000373560,ENST00000373559,ENST00000373561,ENST00000478743,ENST00000421523,ENST00000373556,ENST00000373554,ENST00000444609,ENST00000486704	NM_001166448,NM_018486,NM_001166419,NM_001166422,NM_001166420,NM_001166418,NM_001076231,NR_051952	HDAC8	8.9e-06	2	21	2	1.64e-27	TRUE
ENST00000419057,ENST00000536468,ENST00000429509,ENST00000247668,ENST00000359662,ENST00000414589,ENST00000474950,ENST00000482854,ENST00000469701,ENST00000466107	NM_001194792,NM_021138	TRAF2	8.9e-06	3	7	2	0.00303952	TRUE
ENST00000262187,ENST00000472642,ENST00000478470,ENST00000496004,ENST00000470072,ENST00000470370,ENST00000482053	NM_005614,NM_001031764,NM_001161866,NM_001261182	RHEB	8.9e-06	7	16	2	0.00046344	TRUE
ENST00000341520,ENST00000294129,ENST00000416649,ENST00000413374,ENST00000470006,ENST00000415281,ENST00000439518,ENST00000454134,ENST00000426678,ENST00000453349	NM_184231,NM_016453,NM_001191238,NM_001257711	NCKIPSD	8.9e-06	1	5	2	1.02e-07	TRUE
ENST00000462683,ENST00000451537,ENST00000470730,ENST00000374643,ENST00000374622,ENST00000462972,ENST00000496576	NM_001195214,NM_173834,NM_001101206	YIPF6	8.9e-06	1	2	2	5.12e-20	TRUE
ENST00000280330,ENST00000511437,ENST00000510047,ENST00000504390,ENST00000510052,ENST00000506108,ENST00000508553	NM_001243095,NM_199133,NM_001258388,NM_001258389,NR_047668,NR_047669,NR_047670	FAM173B	9.39e-06	1	2	2	1.77e-06	TRUE
ENST00000330884,ENST00000422525,ENST00000432404,ENST00000540422,ENST00000249130,ENST00000475131	NM_001134169,NM_014351,NM_001076518,NM_001082704,NM_001245814	SULT4A1	1e-05	2	9	2	4.06e-06	TRUE
ENST00000395323,ENST00000412933,ENST00000404397,ENST00000406087,ENST00000464412,ENST00000401506,ENST00000467242,ENST00000407930,ENST00000484150	NM_001031038,NM_001194275,NM_001131693,NM_030915,NM_001099152	LBH	1.07e-05	1	3	2	8.15e-29	TRUE
ENST00000352131,ENST00000055077,ENST00000485545,ENST00000497430,ENST00000494019,ENST00000470266,ENST00000480432,ENST00000479105,ENST00000491206,ENST00000493156,ENST00000463194,ENST00000473493	NM_104994,NM_205530,NM_181471,NM_002914,NM_001080903,NM_001181726,NM_001258122	RFC2	1.2e-05	2	4	2	0.00192589	TRUE
ENST00000535572,ENST00000315939,ENST00000537687,ENST00000447667,ENST00000530271,ENST00000540360,ENST00000538787,ENST00000340908,ENST00000544965,ENST00000545285,ENST00000535698,ENST00000574564,ENST00000574679,ENST00000542543,ENST00000545055,ENST00000534872,ENST00000542424,ENST00000537603,ENST00000544559,ENST00000543065,ENST00000540885	NM_001035560,NM_111363,NM_001125104,NM_001185048,NM_018979,NM_213655,NM_001184985,NM_014823,NM_001249029	WNK1	1.2e-05	1	16	2	1.95e-05	TRUE
ENST00000332499	NM_001194676,NM_006460,NM_001076181	HEXIM1	1.2e-05	9	6	2	6.36e-33	TRUE
UNKNOWN	NR_033910	LOC100130275	1.2e-05	2	1	2	1.11e-05	TRUE
ENST00000064780,ENST00000545687,ENST00000544075,ENST00000393580,ENST00000545886,ENST00000539134,ENST00000537771	NM_152222,NM_032871	RELT	1.2e-05	15	11	2	0.000337479	TRUE
ENST00000175091,ENST00000483117	NM_001031092,NM_001133920,NM_014713,NM_205799,NM_001082639,NM_001261172	LAPTM4A	1.2e-05	5	4	2	4.74e-12	TRUE
ENST00000443358,ENST00000376649,ENST00000322060,ENST00000440818,ENST00000542167,ENST00000538037,ENST00000544662,ENST00000456665,ENST00000544213,ENST00000535067,ENST00000537484,ENST00000543754	NM_001002019,NM_001002020,NM_025215,NM_001163051,NM_001184026	PUS1	1.2e-05	1	4	2	1.4e-33	TRUE
UNKNOWN	NR_033957	LOC643650	1.2e-05	17	18	2	1.66e-05	TRUE
ENST00000489144,ENST00000464525,ENST00000379357,ENST00000379340,ENST00000486319,ENST00000503564,ENST00000511773,ENST00000513506,ENST00000508848,ENST00000504677,ENST00000506060,ENST00000502415,ENST00000514917,ENST00000507355,ENST00000511313,ENST00000504157,ENST00000508910,ENST00000443430,ENST00000513438,ENST00000504101	NM_001097615	POLR2J3	1.2e-05	3	4	2	0.00217419	TRUE
ENST00000491493,ENST00000487775,ENST00000541529,ENST00000477958,ENST00000270776,ENST00000483936,ENST00000538557,ENST00000465632,ENST00000460189,ENST00000493288,ENST00000498356,ENST00000496718	NM_001006303,NM_002631,NM_001009467,NM_001143738,NM_001204966	PGD	1.2e-05	1	1	2	9.38e-09	TRUE
ENST00000327111,ENST00000512697,ENST00000502982,ENST00000506162	NM_005654,NM_175804	NR2F1	1.2e-05	4	5	2	7.8e-10	TRUE
ENST00000357037	NM_001001471,NM_012232,NM_001081731,NM_001111103	PTRF	1.2e-05	2	11	2	1.68e-10	TRUE
ENST00000394681,ENST00000274938	NM_152753	SCUBE3	1.4e-05	11	18	2	4.33e-13	TRUE
ENST00000357325,ENST00000537739,ENST00000368209,ENST00000465180,ENST00000416666,ENST00000482651,ENST00000477306,ENST00000368206,ENST00000469145,ENST00000471377,ENST00000495212	NM_004494,NM_001126050,NM_001126051,NM_175832	HDGF	1.49e-05	1	8	2	1.1e-15	TRUE
ENST00000252029,ENST00000395681,ENST00000395680,ENST00000487577,ENST00000395678,ENST00000476284,ENST00000425169,ENST00000487162	NM_001113755,NM_001953,NM_001113756,NM_001257988,NM_001257989	TYMP	1.61e-05	2	5	2	0.000111631	TRUE
ENST00000540432,ENST00000354777,ENST00000262348,ENST00000370976,ENST00000498615,ENST00000491811,ENST00000497187,ENST00000534713,ENST00000530486,ENST00000533537,ENST00000370973,ENST00000471243,ENST00000491076,ENST00000527864,ENST00000370971	NM_001031294,NM_001132468,NM_024911,NM_001002292,NM_001193334,NM_001192651	WLS	1.61e-05	2	7	2	7.13e-15	TRUE
ENST00000420587,ENST00000413628,ENST00000414904,ENST00000434072	NR_040077	GNG12-AS1	1.61e-05	2	9	2	1.17e-08	TRUE
ENST00000424094,ENST00000598163,ENST00000443966	NR_002785	GNAS-AS1	1.61e-05	14	14	2	4.9e-25	TRUE
ENST00000270162,ENST00000478426	NM_204682,NM_173354,NM_105589,NM_179534,NM_001251717	SIK1	1.61e-05	10	20	2	4.08e-05	TRUE
ENST00000296490,ENST00000487402,ENST00000469000,ENST00000463624	NM_001006135,NM_025222,NM_001105459,NM_001261101	WDR82	1.61e-05	2	6	2	5.65e-20	TRUE
ENST00000553521,ENST00000554465,ENST00000394366,ENST00000553369,ENST00000553548,ENST00000557435,ENST00000557337,ENST00000557154,ENST00000451983,ENST00000553635,ENST00000556184,ENST00000557460,ENST00000556587,ENST00000555547,ENST00000556436,ENST00000555412,ENST00000554021,ENST00000555349,ENST00000556330,ENST00000556647,ENST00000554929	NM_001031197,NM_001195592,NM_006925,NM_001039465,NM_001195587,NM_001098929	SRSF5	1.61e-05	4	6	2	2.17e-33	TRUE
ENST00000430524,ENST00000435265,ENST00000432879,ENST00000402752,ENST00000488484,ENST00000331821,ENST00000411892,ENST00000467920,ENST00000416427,ENST00000421656,ENST00000423859,ENST00000418705,ENST00000448394,ENST00000486575	NM_001006183,NM_002882,NM_001185070,NM_001034586,NM_125246,NM_001260864	RANBP1	1.61e-05	2	4	2	5.63e-14	TRUE
UNKNOWN	NR_015431,NR_024153	FLJ43663	1.61e-05	5	18	2	1.12e-11	TRUE
ENST00000469172,ENST00000461310,ENST00000265866,ENST00000480987,ENST00000441000,ENST00000486854,ENST00000467249,ENST00000354695,ENST00000481819,ENST00000491200,ENST00000490442,ENST00000478698	NM_001012592,NM_021644,NM_012207,NM_001206579,NM_001243555,NM_001266749	HNRNPH3	1.61e-05	7	8	2	1.82e-46	TRUE
ENST00000424383,ENST00000561626,ENST00000541472	NM_001128636,NM_001206549,NM_001265758	ELFN1	1.61e-05	3	10	2	0.00034435	TRUE
ENST00000392736,ENST00000264674,ENST00000464456,ENST00000472280,ENST00000494292,ENST00000468789,ENST00000460814,ENST00000433243,ENST00000492586,ENST00000461430,ENST00000484519,ENST00000494597,ENST00000487503,ENST00000460890,ENST00000475754,ENST00000481315,ENST00000466623,ENST00000485957,ENST00000486748	NM_001105077,NM_005241,NM_001105078,NM_004991,NM_001163999,NM_001164000,NM_001205194	MECOM	1.8e-05	5	43	2	0.00155469	TRUE
ENST00000463567,ENST00000472212,ENST00000486492,ENST00000481762,ENST00000493198,ENST00000513792	NM_001012849,NR_027789,NR_027788	ZNF767	1.92e-05	10	18	2	1.26e-05	TRUE
ENST00000443222,ENST00000414376,ENST00000252725,ENST00000484375,ENST00000455009,ENST00000418347,ENST00000451682,ENST00000484600,ENST00000458033,ENST00000427217,ENST00000431816,ENST00000417330,ENST00000429246,ENST00000432343,ENST00000445924,ENST00000474880,ENST00000493403,ENST00000468337,ENST00000481997,ENST00000491294,ENST00000463078	NM_128686,NM_001030632,NM_005720,NM_001134356,NM_001014844	ARPC1B	2.05e-05	1	6	2	7.47e-11	TRUE
ENST00000346329,ENST00000301843,ENST00000527622,ENST00000482755,ENST00000376561,ENST00000415461,ENST00000525276,ENST00000532334,ENST00000527962,ENST00000483662,ENST00000498223,ENST00000538675,ENST00000525852,ENST00000393747,ENST00000529736,ENST00000533931	NM_205468,NM_001133549,NM_138565,NM_001184740,NM_005231,NM_001075287,NM_001266284	CTTN	2.05e-05	8	12	2	3.19e-12	TRUE
ENST00000282344	NM_182488,NM_001098059	USP12	2.17e-05	1	3	2	1.62e-11	TRUE
ENST00000581497,ENST00000582730,ENST00000584668,ENST00000581979,ENST00000584773,ENST00000585096,ENST00000258962,ENST00000583741,ENST00000578430	NM_001113741,NM_001195549,NM_001195547,NM_001132865,NM_006924,NM_001078166,NR_034041,NM_001195548,NM_001038007,NM_001076394	SRSF1	2.17e-05	3	5	2	6.44e-13	TRUE
ENST00000444469	NM_001190764	TMEM238	2.17e-05	1	1	2	5.45e-16	TRUE
ENST00000234296,ENST00000464147,ENST00000487853,ENST00000474877,ENST00000467605,ENST00000410039,ENST00000457595	NM_129311,NM_201895,NM_001006517,NM_001101942,NM_001178408,NR_033915,NM_006190	ORC2	2.17e-05	1	1	2	4.71e-19	TRUE
ENST00000399510,ENST00000302955,ENST00000399506,ENST00000489885,ENST00000491753,ENST00000485100,ENST00000451807,ENST00000447163,ENST00000486626,ENST00000493294	NM_001194805,NM_001128827,NM_001365,NM_001191307	DLG4	2.17e-05	1	5	2	2.69e-18	TRUE
ENST00000348849,ENST00000474820,ENST00000409289,ENST00000409075,ENST00000474147,ENST00000475103,ENST00000392753,ENST00000490637,ENST00000409972,ENST00000477965,ENST00000464200,ENST00000491781,ENST00000492283,ENST00000428519,ENST00000477486	NM_205024,NM_002897,NM_016836,NM_001035361	RBMS1	2.17e-05	2	11	2	2.83e-14	TRUE
ENST00000367866,ENST00000559038,ENST00000558944,ENST00000557909,ENST00000429375,ENST00000452019,ENST00000442313,ENST00000367865,ENST00000492850,ENST00000271411,ENST00000420254,ENST00000367862,ENST00000560232,ENST00000557874,ENST00000541643,ENST00000470928,ENST00000443275,ENST00000490100,ENST00000559648	NM_205472,NM_002697,NM_001198783,NM_001198786,NR_037163,NM_214264,NM_001075582	POU2F1	2.17e-05	3	9	2	0.000931097	TRUE
ENST00000297477,ENST00000319018,ENST00000468535,ENST00000319010,ENST00000474813,ENST00000421923,ENST00000414730,ENST00000441933,ENST00000431208	NM_001097620,NM_001046272	TMEM184A	2.17e-05	3	12	2	6.19e-13	TRUE
ENST00000454747,ENST00000372692,ENST00000409104,ENST00000322030,ENST00000372688,ENST00000372686,ENST00000466009,ENST00000477806,ENST00000480217,ENST00000480536,ENST00000485056	NM_001030691,NM_001038564,NM_003011,NM_001122821,NM_001244090,NM_001248000,NM_001248001	SET	2.17e-05	4	5	2	6.03e-24	TRUE
ENST00000401528,ENST00000308344,ENST00000433833,ENST00000414035,ENST00000412417,ENST00000463331,ENST00000433422	NM_014343,NM_001185080,NM_001161643,NM_001046186	CLDN15	2.17e-05	2	2	2	1.82e-07	TRUE
ENST00000331872,ENST00000417584,ENST00000311223,ENST00000339526,ENST00000491322,ENST00000463851,ENST00000461447,ENST00000484996,ENST00000489818,ENST00000475808,ENST00000480604,ENST00000462444	NM_205493,NM_002065,NM_001033056,NM_001033044,NM_001002965,NM_213909,NM_001040474,NM_001266013	GLUL	2.17e-05	1	1	2	0.00036793	TRUE
ENST00000496530,ENST00000392811,ENST00000262188,ENST00000469154,ENST00000356800,ENST00000472789,ENST00000470588,ENST00000485592,ENST00000472988,ENST00000485610,ENST00000472103,ENST00000489503,ENST00000477169,ENST00000460431,ENST00000491651	NM_003078,NM_001003801,NM_001003802,NM_001078154,NM_001260684	SMARCD3	2.19e-05	6	10	2	1.37e-10	TRUE
ENST00000064778,ENST00000356467,ENST00000450446,ENST00000432223	NM_001194786,NM_015159,NM_001205572	FAM168A	2.33e-05	3	13	2	2e-16	TRUE
ENST00000593230,ENST00000587853,ENST00000590330,ENST00000543885,ENST00000269439,ENST00000586604,ENST00000588679,ENST00000592777	NM_152470,NM_001256758,NR_046357	RNF165	2.48e-05	1	25	2	7.06e-10	TRUE
UNKNOWN	NR_027456	LOC100272228	2.48e-05	1	7	2	6.93e-34	TRUE
ENST00000329078,ENST00000571386,ENST00000576635,ENST00000571668,ENST00000573106,ENST00000573990,ENST00000570641,ENST00000570979	NM_001124758,NM_001206154	SPNS2	2.63e-05	1	7	2	6.77e-07	TRUE
ENST00000513209,ENST00000512206,ENST00000312492	NR_003084,NM_018953,NM_001191351	HOXC5	2.63e-05	1	5	2	2.76e-08	TRUE
ENST00000303406,ENST00000507650,ENST00000430889	NM_001194756,NM_014620,NM_153633,NM_001102373	HOXC4	2.63e-05	1	5	2	3.66e-09	TRUE
ENST00000504315,ENST00000509328,ENST00000394331,ENST00000243108	NM_153693,NM_004503,NM_001009335	HOXC6	2.63e-05	1	5	2	1.83e-06	TRUE
ENST00000358769,ENST00000336578,ENST00000309049,ENST00000468798,ENST00000432941,ENST00000495025,ENST00000277795,ENST00000478192	NM_001193774,NM_001131485,NM_001033083,NM_022129,NM_001045886	PBLD	2.91e-05	2	1	2	2.22e-12	TRUE
ENST00000359486,ENST00000335626,ENST00000404876,ENST00000515426	NM_005650,NM_181492,NM_001192574	TCF20	2.91e-05	3	2	2	1.52e-09	TRUE
ENST00000000233,ENST00000463733,ENST00000415666,ENST00000467281,ENST00000489673,ENST00000459680	NM_205325,NM_001168927,NM_001662,NM_001176127,NM_001145221,NM_001083671,NM_001162547,NM_001247616	ARF5	2.91e-05	1	1	2	6.7e-24	TRUE
ENST00000360535,ENST00000593074,ENST00000585466,ENST00000590559,ENST00000592017,ENST00000586457	NM_001194179,NM_001133120,NM_015526,NM_001199570,NM_001046950,NM_001205898	CLIP3	2.91e-05	1	1	2	1.47e-21	TRUE
UNKNOWN	NR_037940	HOXA10-HOXA9	2.91e-05	2	2	2	9.31e-07	TRUE
ENST00000337273,ENST00000454282,ENST00000515483,ENST00000447967,ENST00000520850,ENST00000523768,ENST00000518279,ENST00000513944,ENST00000506351,ENST00000506528,ENST00000511754,ENST00000509030,ENST00000508762,ENST00000505082,ENST00000503084	NM_001131584,NM_002270,NM_153188,NM_001076540	TNPO1	2.91e-05	3	9	2	1.48e-05	TRUE
ENST00000394957,ENST00000470317,ENST00000481568	NM_022153	C10orf54	2.91e-05	1	6	2	7.16e-06	TRUE
ENST00000227507,ENST00000539241,ENST00000536559,ENST00000535993,ENST00000545484,ENST00000542367	NM_205381,NM_001131301,NM_053056,NM_001005757,NM_001046273	CCND1	2.91e-05	7	9	2	5.47e-07	TRUE
ENST00000366527,ENST00000475997,ENST00000489705	NR_026778	HNRNPU-AS1	2.98e-05	1	5	2	0.000244103	TRUE
ENST00000476772,ENST00000372067,ENST00000372064,ENST00000425836,ENST00000482630,ENST00000372055,ENST00000413642,ENST00000417285,ENST00000324450,ENST00000372077,ENST00000519767,ENST00000520948,ENST00000518538,ENST00000523950,ENST00000523873,ENST00000518824,ENST00000523125,ENST00000518689,ENST00000457104,ENST00000512683,ENST00000230480,ENST00000480614,ENST00000520265,ENST00000497139,ENST00000493786	NM_205042,NM_001110355,NM_001204384,NM_001204385,NM_001025366,NM_003376,NM_001025367,NM_001025368,NM_001025369,NM_001025370,NM_001033756,NM_001171622,NM_001171623,NM_001171624,NM_001171625,NM_001171626,NM_001171627,NM_001171628,NM_001171629,NM_001171630,NM_001110501,NM_001110502,NM_001003175,NM_001009854,NM_001081821,NM_214084,NM_174216,NM_001025110	VEGFA	2.98e-05	2	3	2	1.46e-08	TRUE
ENST00000380060,ENST00000398097,ENST00000485305	NM_198270,NM_001136024,NM_001205728	NHS	3.17e-05	1	17	2	4.39e-05	TRUE
ENST00000265354,ENST00000457278	NM_003131,NM_001206016,NM_001252141	SRF	3.6e-05	1	2	2	1.54e-10	TRUE
ENST00000309930,ENST00000335693,ENST00000401647,ENST00000444074,ENST00000416370,ENST00000413931,ENST00000540834,ENST00000488110,ENST00000464028,ENST00000460466	NM_001193311,NM_001193312,NM_024728,NM_001193313	C7orf10	3.6e-05	1	7	2	0.00714289	TRUE
ENST00000353214,ENST00000259477,ENST00000465124	NM_001133468,NM_030978,NM_001034737	ARPC5L	3.67e-05	2	1	2	1.33e-10	TRUE
ENST00000535420,ENST00000368426,ENST00000487542,ENST00000417934,ENST00000461530,ENST00000483226,ENST00000292176	NM_001192204,NM_001252406,NR_045515,NM_001256455,NR_046206,NR_049765	ZBTB7B	3.89e-05	6	6	2	2.07e-24	TRUE
UNKNOWN	NR_027244	LOC151009	3.89e-05	8	11	2	7.59e-41	TRUE
ENST00000312090,ENST00000395808,ENST00000589119,ENST00000269814,ENST00000325464,ENST00000586017,ENST00000592943,ENST00000592373,ENST00000586342	NM_005481,NM_137806	MED16	3.89e-05	4	8	2	2.4e-12	TRUE
ENST00000373710,ENST00000536859,ENST00000487207,ENST00000373709,ENST00000536384,ENST00000491976	NM_001030890,NM_178865,NM_018565,NM_001199037,NM_001199038,NM_001199039,NM_001035285,NM_001244148	SERINC2	3.89e-05	5	4	2	3.58e-22	TRUE
UNKNOWN	NR_024586	LOC100216545	3.89e-05	3	9	2	4.81e-30	TRUE
ENST00000455580,ENST00000420282,ENST00000441461,ENST00000427786,ENST00000358506,ENST00000296122,ENST00000395366,ENST00000464273,ENST00000418910	NM_205122,NM_001132955,NM_002709,NM_206876,NM_001003034,NM_214184,NM_001034653,NM_001260652	PPP1CB	3.89e-05	4	10	2	2.22e-19	TRUE
ENST00000349653,ENST00000402918	NM_001193792,NM_052906,NM_001257171	ELFN2	3.89e-05	8	23	2	1.85e-24	TRUE
ENST00000474033,ENST00000309212,ENST00000342753,ENST00000477278,ENST00000445648,ENST00000473097,ENST00000478517,ENST00000476718,ENST00000464351,ENST00000460473	NM_204636,NM_032348,NM_001075830	MXRA8	4.62e-05	2	4	2	3.58e-30	TRUE
ENST00000324460	NM_205491,NM_001133455,NM_005347,NM_001075148,NM_001266596	HSPA5	4.62e-05	1	6	2	0.00567386	TRUE
ENST00000303569,ENST00000368633,ENST00000368630,ENST00000461638,ENST00000487235,ENST00000524997,ENST00000467860,ENST00000493909,ENST00000476883,ENST00000492073	NM_181715,NM_001076250,NM_001261373	CRTC2	4.74e-05	1	4	2	0.0025677	TRUE
ENST00000292211,ENST00000467683,ENST00000491572,ENST00000476612,ENST00000483639,ENST00000474181,ENST00000497453	NM_017582,NM_001206320	UBE2Q1	4.93e-05	1	1	2	1.55e-07	TRUE
ENST00000371497,ENST00000329613	NM_001193421,NM_173485,NM_001114674	TSHZ2	4.93e-05	10	97	2	0.0013287	TRUE
ENST00000287218,ENST00000373391,ENST00000474522,ENST00000373389,ENST00000469208,ENST00000440482,ENST00000463847	NM_021943,NM_001102145,NM_001256231	ZFAND3	4.93e-05	3	24	2	1.22e-06	TRUE
ENST00000444376,ENST00000283179,ENST00000366525,ENST00000483966,ENST00000468690,ENST00000440865,ENST00000465881,ENST00000476241	NM_004501,NM_031844,NM_001076920	HNRNPU	4.93e-05	2	11	2	6.13e-32	TRUE
UNKNOWN	NR_029411	LOC100133091	4.93e-05	3	18	2	3.75e-20	TRUE
ENST00000374026,ENST00000374023,ENST00000374021	NM_022758,NM_024294	C6orf106	5.19e-05	1	17	2	1.67e-22	TRUE
UNKNOWN	NM_001008737	LOC401052	5.19e-05	1	1	2	6.21e-08	TRUE
ENST00000325718,ENST00000378137,ENST00000578946,ENST00000579179,ENST00000464666,ENST00000466997,ENST00000471200,ENST00000433891,ENST00000494578,ENST00000484263,ENST00000582830	NM_005937,NM_001257665	MLLT6	5.19e-05	1	8	2	0.000757002	TRUE
ENST00000478113,ENST00000395465,ENST00000448060,ENST00000540479,ENST00000395463,ENST00000467889,ENST00000467188,ENST00000354678	NM_033429,NM_001031733,NM_001034671,NM_001244619	CALML4	5.19e-05	2	4	2	6.32e-06	TRUE
ENST00000439817,ENST00000357797,ENST00000361464,ENST00000462994,ENST00000482611,ENST00000494347,ENST00000479811,ENST00000461645,ENST00000492204,ENST00000370094,ENST00000429860,ENST00000419011	NM_001039305,NM_012215,NM_001142434,NM_001206448	MGEA5	5.19e-05	1	4	2	2.17e-15	TRUE
ENST00000427603,ENST00000425019,ENST00000324219,ENST00000350198,ENST00000302217,ENST00000413150,ENST00000347699,ENST00000456652,ENST00000417294,ENST00000496989,ENST00000350878,ENST00000489490,ENST00000476609,ENST00000421882,ENST00000418101,ENST00000477711,ENST00000498066,ENST00000491743	NM_004834,NM_145687,NM_145686,NM_001242559,NM_001242560	MAP4K4	5.19e-05	5	12	2	1.72e-09	TRUE
UNKNOWN	NR_038967	LOC100630923	5.21e-05	3	16	2	1.76e-10	TRUE
ENST00000547693,ENST00000550391,ENST00000540990,ENST00000549226,ENST00000548860,ENST00000536187,ENST00000548874,ENST00000551716,ENST00000550168,ENST00000552465,ENST00000550064,ENST00000552022,ENST00000549971,ENST00000547818,ENST00000547392,ENST00000301050,ENST00000548279,ENST00000550771,ENST00000551544,ENST00000547230,ENST00000552812,ENST00000550190,ENST00000550483,ENST00000552480	NM_000725,NM_174509,NM_001206917,NM_001206916,NM_001206915,NM_001266978	CACNB3	5.52e-05	2	2	2	0.000100797	TRUE
ENST00000394243,ENST00000522122,ENST00000518872,ENST00000307662,ENST00000519664	NM_001133566,NM_007286,NM_001166209,NM_001109974,NM_001166208,NM_001206025	SYNPO	5.52e-05	2	11	2	3.8e-16	TRUE
ENST00000265965,ENST00000525422,ENST00000527494,ENST00000528369,ENST00000531926,ENST00000531299,ENST00000528200,ENST00000529440,ENST00000524589,ENST00000529151,ENST00000532546,ENST00000525920,ENST00000532265,ENST00000533241,ENST00000525168,ENST00000529728,ENST00000530613,ENST00000532389,ENST00000530925,ENST00000533328,ENST00000532212,ENST00000524716,ENST00000530951	NM_012139,NM_001076021	SERGEF	5.52e-05	3	18	2	2.08e-05	TRUE
ENST00000492039,ENST00000295121,ENST00000457114,ENST00000406245,ENST00000409164,ENST00000468984	NM_001079744,NM_138458,NM_001046465,NM_001270719,NM_001256476,NR_046234,NM_001261137	WDR92	5.86e-05	1	1	2	2.3e-16	TRUE
ENST00000504681,ENST00000393354,ENST00000300404	NM_153446,NM_001159388,NM_001159387,NM_001244330	B4GALNT2	6.06e-05	1	8	2	8.5e-14	TRUE
ENST00000554335,ENST00000251091,ENST00000555112,ENST00000392067,ENST00000357634,ENST00000555091,ENST00000557692,ENST00000557013,ENST00000554587,ENST00000555192,ENST00000556069,ENST00000553988,ENST00000555719	NM_001161576,NM_001161577,NM_001206853,NM_015589	SAMD4A	6.19e-05	1	15	2	3.13e-13	TRUE
ENST00000264335,ENST00000466227,ENST00000571732,ENST00000573026,ENST00000496706,ENST00000573196,ENST00000575977,ENST00000469398,ENST00000486241,ENST00000489287,ENST00000576854,ENST00000572108,ENST00000498643	NM_001006219,NR_024058,NM_006761,NM_174491,NM_001246368	YWHAE	6.19e-05	7	7	2	5.46e-22	TRUE
ENST00000411990,ENST00000367080,ENST00000464777,ENST00000468857,ENST00000367079,ENST00000545806,ENST00000541914,ENST00000473310,ENST00000483688	NM_001133585,NM_006212,NM_001018053,NM_174812,NM_001265621	PFKFB2	6.19e-05	5	11	2	0.000885614	TRUE
ENST00000427662,ENST00000369774,ENST00000355946,ENST00000315994,ENST00000540321,ENST00000420222,ENST00000538130	NM_014631	SH3PXD2A	6.58e-05	1	9	2	6.34e-14	TRUE
ENST00000492259,ENST00000482936,ENST00000480273,ENST00000496281	NR_037882	RTEL1-TNFRSF6B	6.85e-05	4	15	2	0.00229894	TRUE
ENST00000495312,ENST00000238788,ENST00000321326,ENST00000404032,ENST00000478980,ENST00000435172,ENST00000475258,ENST00000425720,ENST00000460904,ENST00000444135,ENST00000434544,ENST00000460665,ENST00000469445	NM_001083590,NM_017727,NM_001083432	TMEM214	6.85e-05	1	2	2	2.57e-10	TRUE
ENST00000221419,ENST00000595443,ENST00000388749,ENST00000601449,ENST00000595804,ENST00000597731,ENST00000595164,ENST00000600873,ENST00000601664,ENST00000598985,ENST00000594120,ENST00000601047,ENST00000600233,ENST00000601813,ENST00000600741	NM_001533,NM_001005335,NM_001192030,NM_001266000	HNRNPL	6.85e-05	4	10	2	8.84e-11	TRUE
ENST00000369996	NM_003823,NM_001101306	TNFRSF6B	6.85e-05	1	2	2	1.88e-23	TRUE
ENST00000601949,ENST00000594136,ENST00000596216	NR_037791	RAB4B-EGLN2	6.85e-05	3	6	2	2.51e-08	TRUE
ENST00000563177,ENST00000483405,ENST00000308748,ENST00000566693,ENST00000414952	NM_181718,NM_001081741	ASPHD1	6.85e-05	1	1	2	3.93e-51	TRUE
ENST00000528930,ENST00000326956,ENST00000371320,ENST00000417664,ENST00000371319,ENST00000533946,ENST00000357475,ENST00000426150,ENST00000444533,ENST00000420121,ENST00000530618,ENST00000533209,ENST00000525990,ENST00000528787,ENST00000448572	NM_204564,NM_001009955,NM_018070,NM_145716,NM_001104986,NM_001261084	SSBP3	6.85e-05	3	27	2	1.06e-19	TRUE
ENST00000539408,ENST00000542722,ENST00000545859,ENST00000266458,ENST00000421801,ENST00000544284,ENST00000541453,ENST00000545047,ENST00000543602,ENST00000540424,ENST00000537201,ENST00000545887,ENST00000541960,ENST00000546017,ENST00000539289,ENST00000539170,ENST00000535576,ENST00000545290	NM_001133707,NM_031412,NM_001190287,NM_001033616,NM_001260686	GABARAPL1	6.85e-05	7	2	2	3.13e-46	TRUE
ENST00000532911,ENST00000489897,ENST00000372377,ENST00000335430,ENST00000330208,ENST00000545417,ENST00000353126,ENST00000372374,ENST00000351035,ENST00000372375,ENST00000262915,ENST00000361400,ENST00000361392,ENST00000530154,ENST00000479383,ENST00000347631,ENST00000484868,ENST00000461066,ENST00000531816,ENST00000332628,ENST00000530581,ENST00000533997,ENST00000533212,ENST00000533933,ENST00000531993…	NM_001037299,NM_001270466,NM_213759,NM_001002882,NR_073016,NR_073023,NR_073021,NR_073019,NR_073020,NR_073018,NM_001270462,NR_073017,NM_001270460,NM_001270459,NM_001270465,NM_001270463,NM_001270464,NM_001270461,NM_006279,NM_174968,NM_174971,NM_174963,NM_174964,NM_174965,NM_174966,NM_174967,NM_174969,NM_174970	ST3GAL3	6.85e-05	2	10	2	1.06e-10	TRUE
ENST00000326632,ENST00000453662,ENST00000538033	NR_024077	WASH2P	6.85e-05	3	4	2	5.34e-07	TRUE
ENST00000379080,ENST00000379081,ENST00000379084,ENST00000379087,ENST00000379089,ENST00000445726,ENST00000297620,ENST00000422409,ENST00000379078	NM_147202,NM_001184942,NM_001184945,NM_001184940,NM_001184943,NM_001184941	FAM219A	6.85e-05	1	6	2	1.35e-15	TRUE
ENST00000598654,ENST00000303961,ENST00000593972,ENST00000406058,ENST00000593726,ENST00000594380,ENST00000601733,ENST00000593397,ENST00000593525,ENST00000596517,ENST00000597746,ENST00000594140,ENST00000599579,ENST00000593445,ENST00000593477,ENST00000602166,ENST00000595621,ENST00000595051	NM_080732,NM_053046,NM_001102193,NM_001132305,NM_001246513,NM_001261091	EGLN2	6.85e-05	3	5	2	9.53e-06	TRUE
ENST00000375859,ENST00000485804,ENST00000541629,ENST00000469017,ENST00000462844,ENST00000485565,ENST00000483785	NM_001132974,NM_006717,NM_001195370,NM_001192821	SPIN1	6.85e-05	1	8	2	0.000300875	TRUE
ENST00000495013,ENST00000258648,ENST00000378586,ENST00000487937,ENST00000417167	NM_014166,NM_001034486,NM_001270629,NM_001183593,NM_139837,NM_001265782	MED4	6.85e-05	1	2	2	8.35e-27	TRUE
ENST00000313899,ENST00000353341,ENST00000514325,ENST00000543098,ENST00000352301,ENST00000514671,ENST00000508119,ENST00000541060,ENST00000513584,ENST00000509263,ENST00000507010,ENST00000515432,ENST00000503822,ENST00000509107	NM_001031143,NM_031369,NM_031370,NM_002138,NM_001003810,NM_001098064,NM_001260807	HNRNPD	6.96e-05	4	10	2	1.22e-43	TRUE
ENST00000335585,ENST00000506140,ENST00000515571,ENST00000382599,ENST00000507294,ENST00000513943,ENST00000314348,ENST00000509917,ENST00000507028	NM_181876,NM_001206994,NM_001206995,NM_001206996,NM_001261139	PPP2R2C	6.96e-05	2	24	2	6.51e-09	TRUE
ENST00000467603,ENST00000373537,ENST00000397137,ENST00000414542,ENST00000397135,ENST00000397134,ENST00000397131,ENST00000432507,ENST00000445723,ENST00000414080,ENST00000456058	NM_001190863,NM_001133398,NM_001167821,NM_001167823,NM_006698,NM_001167822,NM_001167820,NM_001009852,NM_174250	BLCAP	6.96e-05	1	9	2	0.000178328	TRUE
ENST00000578921,ENST00000306096,ENST00000578734,ENST00000581109,ENST00000583137,ENST00000435762,ENST00000578737,ENST00000583921,ENST00000580361,ENST00000577796,ENST00000577371,ENST00000580795,ENST00000577284	NM_006868,NM_001076944,NM_001266436	RAB31	7.34e-05	1	10	2	0.00789616	TRUE
ENST00000598463,ENST00000345523,ENST00000391812,ENST00000596655,ENST00000596287,ENST00000597705,ENST00000597493,ENST00000593287,ENST00000600373,ENST00000601267,ENST00000595794,ENST00000596554,ENST00000599004,ENST00000602125	NM_199250,NM_199249	C19orf48	8.15e-05	6	9	2	3.38e-06	TRUE
ENST00000382518,ENST00000543916,ENST00000536586,ENST00000382519,ENST00000546073,ENST00000538834,ENST00000538418,ENST00000009180,ENST00000382515,ENST00000481267,ENST00000540891	NM_204762,NM_001114965,NM_001769,NM_001009305,NM_214006,NM_173900,NM_001114764,NM_001260661	CD9	8.15e-05	2	8	2	2.5e-08	TRUE
ENST00000408454	NR_003068	SNORD88B	8.15e-05	1	3	2	3.63e-18	TRUE
ENST00000370994,ENST00000370995,ENST00000361219,ENST00000370990,ENST00000493607,ENST00000462814,ENST00000484880,ENST00000490406	NM_001031293,NM_001018068,NM_001018069,NM_001018067,NM_015640,NM_001128200,NM_001046449	SERBP1	8.15e-05	1	8	2	1.8e-10	TRUE
ENST00000568444,ENST00000567298,ENST00000568346,ENST00000568499,ENST00000347925,ENST00000353170,ENST00000316853,ENST00000270583,ENST00000566349,ENST00000569487,ENST00000562155,ENST00000562261,ENST00000566661,ENST00000562913,ENST00000567513,ENST00000562872,ENST00000564484,ENST00000565328,ENST00000569747,ENST00000564396,ENST00000568502,ENST00000561825,ENST00000568338,ENST00000563845,ENST00000566561	NM_001030578,NM_001132574,NM_017566,NM_001184854,NM_001184856,NM_001243840	KLHDC4	8.57e-05	5	15	2	4.32e-08	TRUE
ENST00000548946,ENST00000318066,ENST00000550657,ENST00000549833,ENST00000549490,ENST00000552442	NM_001012810,NM_001193594,NM_001134058,NM_003348,NM_001076258,NM_001163058,NM_001252131	UBE2N	8.57e-05	1	8	2	1.12e-16	TRUE
ENST00000358797	NM_106618,NM_001194714,NM_006703,NM_001082466,NM_001252389,NM_001257298	NUDT3	8.57e-05	1	7	2	1.12e-10	TRUE
ENST00000594552,ENST00000597987,ENST00000601953,ENST00000593700,ENST00000597716,ENST00000328867,ENST00000595177,ENST00000597354,ENST00000601685,ENST00000594497,ENST00000598684,ENST00000597740	NM_144691,NM_001192697	CAPN12	8.57e-05	2	2	2	0.00746032	TRUE
UNKNOWN	NM_001202470	RPS10-NUDT3	8.57e-05	2	10	2	0.000565785	TRUE
ENST00000373747,ENST00000257075,ENST00000424085,ENST00000525843,ENST00000426105,ENST00000440538,ENST00000498419,ENST00000373741,ENST00000423018,ENST00000373742,ENST00000530669,ENST00000529846,ENST00000525997,ENST00000527498,ENST00000498627,ENST00000471894,ENST00000490546,ENST00000532678,ENST00000526128,ENST00000526215,ENST00000525948,ENST00000480602,ENST00000524516,ENST00000531867	NM_128476,NM_001012840,NM_001134123,NM_014676,NM_001020658,NM_001193123	PUM1	8.98e-05	1	11	2	0.000164416	TRUE
ENST00000306385,ENST00000354870,ENST00000397816,ENST00000520970,ENST00000306349,ENST00000518913,ENST00000397814,ENST00000520626,ENST00000520982,ENST00000518656,ENST00000521385,ENST00000471755,ENST00000483364,ENST00000521521,ENST00000523849,ENST00000523457,ENST00000523749,ENST00000517324,ENST00000522332	NM_214563,NR_033404,NR_033403,NM_001199,NM_006129,NM_001258063	BMP1	9.11e-05	1	8	2	1.66e-09	TRUE
ENST00000254942,ENST00000566051,ENST00000567130,ENST00000569584,ENST00000566750,ENST00000569542,ENST00000566257,ENST00000564982,ENST00000569611,ENST00000567296,ENST00000569280,ENST00000567841	NM_005652,NM_001205589	TERF2	9.11e-05	1	2	2	6.11e-20	TRUE
ENST00000260408,ENST00000402627,ENST00000561288,ENST00000482945,ENST00000396136,ENST00000396140,ENST00000470269,ENST00000462061,ENST00000481164,ENST00000475898,ENST00000559053,ENST00000558733,ENST00000439637,ENST00000497846,ENST00000558004,ENST00000560608,ENST00000561149,ENST00000461408	NM_204261,NM_001131095,NM_001110,NM_001130531,NM_174496	ADAM10	9.11e-05	1	6	2	3.3e-12	TRUE
ENST00000588618,ENST00000252699,ENST00000424234,ENST00000589528,ENST00000390009,ENST00000495553,ENST00000586538,ENST00000489451,ENST00000440400,ENST00000497637,ENST00000477174	NM_205126,NM_001133814,NM_001098052,NM_004924,NM_001261802	ACTN4	9.11e-05	17	35	2	0.000925679	TRUE
ENST00000573001,ENST00000326577,ENST00000341627,ENST00000574699,ENST00000575124,ENST00000575836,ENST00000571351	NM_016639,NM_001193299,NM_001142839,NM_001206328,NM_001206327	TNFRSF12A	9.11e-05	6	7	2	3.73e-26	TRUE
ENST00000400259,ENST00000344548,ENST00000315554,ENST00000498236,ENST00000421089,ENST00000411827	NM_205048,NM_044472,NM_001791,NM_001039802,NM_001003254,NM_001078680,NM_001046332,NM_001182116,NM_001257880	CDC42	9.11e-05	2	6	2	1.19e-16	TRUE
ENST00000587885,ENST00000292433,ENST00000588173	NM_004907,NM_001075871,NM_001266014	IER2	9.11e-05	1	5	2	8.34e-10	TRUE
ENST00000553824,ENST00000250405,ENST00000557236,ENST00000557579,ENST00000554635,ENST00000556599	NM_004050,NM_001199839,NM_001031635,NM_001076533	BCL2L2	9.11e-05	3	4	2	2.09e-42	TRUE
ENST00000323541,ENST00000449825,ENST00000454838,ENST00000532909,ENST00000529539,ENST00000323578,ENST00000534207,ENST00000429789,ENST00000528581,ENST00000336845,ENST00000436108,ENST00000524538,ENST00000528521,ENST00000526714,ENST00000528534,ENST00000524832,ENST00000531010,ENST00000531859,ENST00000534254,ENST00000528426,ENST00000533056,ENST00000533059,ENST00000530939,ENST00000525225,ENST00000525840…	NM_001199634,NM_001133685,NM_001142675,NM_001142677,NM_023947,NM_001142674,NM_001142676,NM_001015515,NM_001243810,NM_001266971	CHID1	9.11e-05	2	5	2	5.26e-06	TRUE
ENST00000539231,ENST00000477333,ENST00000377687,ENST00000476859,ENST00000464404	NM_001730,NM_001097489,NM_001083727,NM_001082053	KLF5	9.11e-05	5	5	2	2.93e-06	TRUE
ENST00000425361,ENST00000457492,ENST00000281871,ENST00000409255,ENST00000455239,ENST00000485869,ENST00000480182,ENST00000491178	NM_001193944,NM_025029,NM_001099204	MZT2B	9.11e-05	4	2	2	1.12e-07	TRUE
ENST00000373795,ENST00000546138,ENST00000466448,ENST00000497015,ENST00000477193,ENST00000489898,ENST00000472353	NM_005626,NM_001077216,NM_001101231,NM_001260878	SRSF4	9.11e-05	1	6	2	3.05e-10	TRUE
ENST00000306627,ENST00000484048,ENST00000346855,ENST00000495141,ENST00000481622,ENST00000442670,ENST00000424381,ENST00000467766,ENST00000475680,ENST00000452012,ENST00000493707	NM_182666,NM_003341,NM_001202476,NM_001206216	UBE2E1	9.11e-05	4	9	2	6.13e-29	TRUE
ENST00000374811,ENST00000374807,ENST00000312391,ENST00000484069,ENST00000374804,ENST00000469091	NM_001170649,NM_001170650,NM_031206,NM_001076815	LAS1L	9.11e-05	1	6	2	7.32e-19	TRUE
ENST00000481633,ENST00000406869,ENST00000399654,ENST00000402746,ENST00000496548,ENST00000468372,ENST00000265854,ENST00000477172,ENST00000450235,ENST00000437877,ENST00000438959,ENST00000444373,ENST00000421113,ENST00000464742,ENST00000491858,ENST00000483165,ENST00000459731,ENST00000486340,ENST00000469871,ENST00000445959,ENST00000429625,ENST00000455998,ENST00000429779	NM_003550,NM_001013836,NM_001013837,NM_001102044	MAD1L1	9.42e-05	2	52	2	0.00116812	TRUE
ENST00000449098,ENST00000320084,ENST00000336053,ENST00000554969,ENST00000556142,ENST00000554455,ENST00000430246,ENST00000553753,ENST00000555309,ENST00000555914,ENST00000557442,ENST00000556628,ENST00000556513,ENST00000555883,ENST00000553300,ENST00000557201,ENST00000553444,ENST00000556897,ENST00000420743,ENST00000557157,ENST00000554539,ENST00000554383,ENST00000555585,ENST00000554417,ENST00000555215…	NM_001132312,NM_031314,NM_001077443,NM_004500,NM_001077442,NM_001034395,NM_001082038,NM_001243694,NM_001243693,NM_001246442,NM_001261233	HNRNPC	9.42e-05	2	26	2	7.1e-11	TRUE
ENST00000287652,ENST00000448281,ENST00000450534,ENST00000437082,ENST00000426850,ENST00000496355	NM_001131647,NM_014760	TATDN2	9.42e-05	2	5	2	1.81e-08	TRUE
ENST00000380771,ENST00000380773,ENST00000380769,ENST00000380764	NM_020135,NM_130395,NM_001103106	WRNIP1	9.89e-05	1	2	2	0.00277481	TRUE
ENST00000219343,ENST00000379152,ENST00000566834,ENST00000566454,ENST00000568088,ENST00000564708,ENST00000562727,ENST00000563080,ENST00000563146,ENST00000568024,ENST00000566579,ENST00000567346,ENST00000563208,ENST00000562863,ENST00000567325	NM_003983,NM_001076785,NM_001075937	SLC7A6	9.89e-05	5	19	2	7.27e-07	TRUE
ENST00000423258,ENST00000333572,ENST00000448612,ENST00000479310,ENST00000546525,ENST00000441385,ENST00000467418,ENST00000420344,ENST00000486490,ENST00000476322,ENST00000496752,ENST00000464249,ENST00000546953,ENST00000474018	NM_001202550,NM_182552	WDR27	9.89e-05	2	18	2	0.0037955	TRUE
ENST00000493559,ENST00000373926,ENST00000340778,ENST00000453291,ENST00000474117,ENST00000476481	NM_001007842,NM_012164,NM_001076974	FBXW2	0.000104092	1	7	2	3.13e-09	TRUE
ENST00000395290,ENST00000358597,ENST00000395292,ENST00000310513,ENST00000361904,ENST00000539455,ENST00000531165,ENST00000532048,ENST00000524648,ENST00000539254,ENST00000534614,ENST00000422993,ENST00000532146,ENST00000530151,ENST00000528434,ENST00000525841,ENST00000543178,ENST00000535982,ENST00000526419,ENST00000528538,ENST00000526277	NM_001012521,NM_001132504,NM_198700,NM_006560,NM_001172639,NM_001025596,NM_001172640,NM_001101212	CELF1	0.000104092	1	12	2	9.35e-30	TRUE
ENST00000339686,ENST00000462721,ENST00000402589,ENST00000488542,ENST00000434389,ENST00000460327,ENST00000408915,ENST00000472365,ENST00000490622,ENST00000488762,ENST00000436012,ENST00000467532,ENST00000414866,ENST00000480502,ENST00000469960,ENST00000467637,ENST00000484064,ENST00000486756,ENST00000478648,ENST00000601368,ENST00000419602,ENST00000429837,ENST00000462126,ENST00000443640,ENST00000443857…	NM_001035516,NM_033317,NM_001126056,NM_001126058,NM_001126057,NM_001126059,NR_033746,NM_001190347,NM_001190348,NM_001190349,NM_001082463	DMKN	0.000104092	1	5	2	1.04e-09	TRUE
ENST00000258412,ENST00000396809,ENST00000444881,ENST00000465082,ENST00000445635,ENST00000437694,ENST00000439306,ENST00000492966,ENST00000466012,ENST00000429501,ENST00000425694,ENST00000476429,ENST00000495113,ENST00000418569,ENST00000440422,ENST00000444183,ENST00000453776,ENST00000444000,ENST00000453281,ENST00000451181,ENST00000434015,ENST00000413976,ENST00000420341	NM_001131251,NM_022152,NM_205798,NM_001266529	TMBIM1	0.000109199	1	5	2	0.000178172	TRUE
ENST00000514383,ENST00000502296,ENST00000504734,ENST00000415618,ENST00000452673,ENST00000247461,ENST00000502498,ENST00000507307,ENST00000504579,ENST00000502673,ENST00000513246,ENST00000506654,ENST00000512607,ENST00000514032,ENST00000510810,ENST00000509563,ENST00000503126,ENST00000508787,ENST00000506298,ENST00000505090,ENST00000503303	NM_001243210,NM_001030620,NM_001133567,NM_001746,NM_001024649,NM_001003232,NM_001105612	CANX	0.000109199	2	11	2	2.36e-05	TRUE
ENST00000295065,ENST00000404530,ENST00000379383,ENST00000490459,ENST00000426310,ENST00000422936,ENST00000413686,ENST00000407893,ENST00000437854	NM_001195423,NM_015955,NM_001137602,NM_001076395,NM_001244877	MEMO1	0.000114324	3	14	2	1.65e-05	TRUE
ENST00000263274,ENST00000597146,ENST00000599322,ENST00000536218,ENST00000427526,ENST00000594759,ENST00000594067,ENST00000601091,ENST00000596672,ENST00000596332,ENST00000596457,ENST00000597901,ENST00000542460,ENST00000595758,ENST00000596104,ENST00000599165,ENST00000596549,ENST00000593425,ENST00000600055,ENST00000598938	NM_100689,NM_000234,NM_001102548	LIG1	0.000114324	2	4	2	0.00025869	TRUE
ENST00000367090	NM_020823	TMEM181	0.000114324	7	24	2	0.000719831	TRUE
ENST00000273038,ENST00000413604,ENST00000451674,ENST00000424529,ENST00000426568,ENST00000430365,ENST00000404339,ENST00000445411,ENST00000418000,ENST00000458499,ENST00000417206,ENST00000417466,ENST00000424709,ENST00000419541,ENST00000437722,ENST00000480288,ENST00000463387	NM_001030593,NM_001194848,NM_001131575,NM_014667,NM_001128220,NM_001128221,NM_001128219,NM_001099128	VGLL4	0.000114324	1	15	2	1.81e-09	TRUE
ENST00000261965,ENST00000469302,ENST00000375669,ENST00000462580,ENST00000464139,ENST00000483532	NM_001168727,NM_001133794,NM_006322,NM_001192632	TUBGCP3	0.000114324	2	11	2	0.00290038	TRUE
ENST00000380358,ENST00000358181,ENST00000330494,ENST00000570758,ENST00000574022,ENST00000452447,ENST00000572579,ENST00000571249,ENST00000479080,ENST00000470531,ENST00000466233,ENST00000473376,ENST00000572750,ENST00000439235,ENST00000573936,ENST00000449744,ENST00000481999	NM_001005273,NM_001005271,NM_005852	CHD3	0.000120183	2	5	2	3.09e-09	TRUE
ENST00000452075,ENST00000452306,ENST00000435805,ENST00000473592	NR_026777	ZNF37BP	0.000120183	1	4	2	4.77e-11	TRUE
ENST00000356462,ENST00000400345,ENST00000589054,ENST00000256832,ENST00000382850,ENST00000256830,ENST00000590694,ENST00000591989,ENST00000591579,ENST00000592846,ENST00000585363,ENST00000588516,ENST00000456986,ENST00000585594,ENST00000587547,ENST00000357895,ENST00000435432,ENST00000586263,ENST00000456173,ENST00000588494,ENST00000588066,ENST00000431212,ENST00000586268,ENST00000587190,ENST00000585323…	NM_001132046,NM_001144968,NM_001144964,NM_001144971,NM_001144965,NM_001144969,NM_001144966,NM_015277,NM_001144967,NM_001144970,NM_001171236,NM_001243960	NEDD4L	0.000120183	2	15	2	0.00791598	TRUE
ENST00000393784,ENST00000519860,ENST00000520326,ENST00000520642,ENST00000523291,ENST00000518247,ENST00000326654,ENST00000519567,ENST00000519796,ENST00000523650,ENST00000521392,ENST00000523366,ENST00000520399,ENST00000523215	NM_001031711,NM_001076417	ERGIC1	0.000121192	10	25	2	7.39e-06	TRUE
ENST00000255681,ENST00000542105,ENST00000538042,ENST00000541041,ENST00000543422,ENST00000545464,ENST00000542359,ENST00000538595	NM_001194685,NM_014067,NM_001046509,NM_001204770	MACROD1	0.000121192	8	36	2	0.00143889	TRUE
ENST00000330106,ENST00000524587	NM_001193263,NM_016564,NM_213866,NM_001080222,NM_001257682	CEND1	0.000121192	2	1	2	1.27e-06	TRUE
ENST00000222329,ENST00000440177,ENST00000595448,ENST00000593944,ENST00000598965,ENST00000596818,ENST00000595941	NM_006494,NM_001205465	ERF	0.000121192	5	5	2	5.12e-19	TRUE
ENST00000246043,ENST00000377807,ENST00000360807,ENST00000377813,ENST00000470422,ENST00000468428,ENST00000455029,ENST00000495501,ENST00000398782	NM_004587,NM_001042576,NM_001003179,NM_001257346	RRBP1	0.000121192	2	4	2	3.59e-10	TRUE
ENST00000540224,ENST00000228865	NM_001310,NM_001076088,NM_001261237	CREBL2	0.000121192	5	11	2	0.00422907	TRUE
ENST00000553010	NR_002594	SLC7A5P2	0.000121192	1	3	2	4.62e-14	TRUE
ENST00000418331,ENST00000440289,ENST00000534219,ENST00000527952,ENST00000526550,ENST00000527026	NM_204621,NM_002843,NM_001098503	PTPRJ	0.000121192	6	25	2	0.000386881	TRUE
ENST00000442725,ENST00000600277,ENST00000252595,ENST00000598424,ENST00000599380,ENST00000600297,ENST00000593701,ENST00000594962,ENST00000598848,ENST00000599965	NM_001039602,NM_198580,NM_001083931,NM_001033625	SLC27A1	0.000121192	3	5	2	3.45e-13	TRUE
ENST00000379535,ENST00000559697,ENST00000426013,ENST00000331268,ENST00000557961,ENST00000559930,ENST00000558746,ENST00000558893,ENST00000558830,ENST00000558522,ENST00000559619,ENST00000559345,ENST00000561171,ENST00000558502,ENST00000559258,ENST00000559690,ENST00000559158,ENST00000560422,ENST00000558539,ENST00000559244,ENST00000559751,ENST00000558923,ENST00000560710	NM_001037176,NM_001037173,NM_001134207,NM_006791,NM_206839,NM_001035448,NM_001253749,NM_001265603,NM_001265604,NM_001265605,NM_001266183	MORF4L1	0.000121192	3	4	2	1.14e-38	TRUE
ENST00000367334,ENST00000367333,ENST00000367332,ENST00000367330,ENST00000367329,ENST00000472411,ENST00000485839,ENST00000495205,ENST00000497582,ENST00000455367,ENST00000435310,ENST00000414605	NM_016456,NM_001105491	TMEM9	0.000121192	1	7	2	4.63e-13	TRUE
ENST00000284719,ENST00000344357,ENST00000428402,ENST00000497760,ENST00000409546,ENST00000392560,ENST00000462000,ENST00000429575,ENST00000427472	NM_001031254,NM_001134033,NM_013341,NM_001011708,NM_001046045,NM_001178373,NM_001266628	OLA1	0.000121192	2	9	2	1.54e-07	TRUE
ENST00000377735,ENST00000270223,ENST00000537879,ENST00000602829,ENST00000601370,ENST00000597053,ENST00000602469,ENST00000598237	NM_004943	DMWD	0.000121192	1	1	2	0.000950365	TRUE
ENST00000423145,ENST00000245903,ENST00000597430	NM_001252,NM_001044531	CD70	0.000121192	3	1	2	1.25e-30	TRUE
ENST00000265753,ENST00000489484,ENST00000353999,ENST00000479338,ENST00000495187	NM_001080861,NM_001131977,NM_031992,NM_022170,NM_001075752,NM_001243448,NM_001243447,NM_001266062	EIF4H	0.000121192	5	3	2	1.1e-12	TRUE
ENST00000424310,ENST00000519865,ENST00000274542,ENST00000518284,ENST00000519985,ENST00000521606,ENST00000518802,ENST00000520638,ENST00000518062,ENST00000521266,ENST00000520548	NM_001199380,NM_144726,NM_001199381,NM_001199382,NM_001199383,NM_001102168	RNF145	0.000130912	1	8	2	7.84e-08	TRUE
ENST00000537971,ENST00000444315,ENST00000011898,ENST00000539631,ENST00000407263,ENST00000431374,ENST00000492305	NM_001168320,NM_006675,NM_001077226	TSPAN9	0.000136913	2	11	2	1.82e-09	TRUE
ENST00000509104,ENST00000434067,ENST00000415685,ENST00000506712,ENST00000265074,ENST00000415167,ENST00000507141	NM_000908,NM_001204375,NM_001204376,NM_174127,NM_001179103,NM_123879	NPR3	0.000136913	1	6	2	0.00109106	TRUE
ENST00000360768,ENST00000434382	NM_001001328,NM_173517,NM_001266931	VKORC1L1	0.000136913	1	6	2	1.81e-15	TRUE
ENST00000412143,ENST00000444400,ENST00000450562,ENST00000376242,ENST00000428067,ENST00000425066,ENST00000414348	NR_026816	PSORS1C3	0.00013958	4	3	2	4.5e-06	TRUE
ENST00000554581,ENST00000407796,ENST00000349310,ENST00000553506,ENST00000557552,ENST00000402615,ENST00000555528,ENST00000555458,ENST00000554192,ENST00000544168,ENST00000554585,ENST00000554848,ENST00000554826,ENST00000556836,ENST00000555380,ENST00000555926,ENST00000557494,ENST00000553797	NM_205055,NM_005163,NM_001014431,NM_001014432,NM_001159776,NM_173986,NM_001161857,NM_001261625	AKT1	0.000141966	4	9	2	0.00120996	TRUE
ENST00000255559,ENST00000542342,ENST00000579988,ENST00000582769,ENST00000581581,ENST00000579319,ENST00000583715,ENST00000579491,ENST00000584129,ENST00000579732,ENST00000580557,ENST00000583146,ENST00000582179,ENST00000581005,ENST00000579018,ENST00000578620,ENST00000583507	NM_001159770,NM_139177,NM_001076390	SLC39A11	0.000141966	2	17	2	2.58e-10	TRUE
ENST00000225603,ENST00000393408,ENST00000581003,ENST00000402583,ENST00000495350,ENST00000444685	NM_204332,NM_006807,NM_001127228,NM_001206415,NM_001252558	CBX1	0.000141966	4	6	2	1.06e-41	TRUE
ENST00000221214,ENST00000457542,ENST00000512970,ENST00000260357,ENST00000505373,ENST00000456763,ENST00000514566,ENST00000502292,ENST00000510535,ENST00000505061,ENST00000507762,ENST00000515164,ENST00000507147,ENST00000503526,ENST00000508050,ENST00000506301,ENST00000502695,ENST00000512433	NM_014994,NM_001128608,NM_001265611,NR_049761,NR_049762	MAPKBP1	0.000141966	1	8	2	1.5e-15	TRUE
ENST00000512828,ENST00000394730,ENST00000515255,ENST00000484843,ENST00000507281,ENST00000515279,ENST00000360505,ENST00000510865,ENST00000509336,ENST00000505640,ENST00000394728,ENST00000503409	NM_001031720,NM_024751,NM_001099035,NM_001266390	GSTCD	0.000141966	1	8	2	2.32e-08	TRUE
ENST00000337147,ENST00000367075,ENST00000392177,ENST00000476189	NM_204885,NM_003379,NM_001111077,NM_174217,NM_001082122	EZR	0.000147495	6	14	2	0.00438614	TRUE
ENST00000303127,ENST00000504071,ENST00000515209,ENST00000514458,ENST00000502560,ENST00000502721,ENST00000513877,ENST00000506310	NM_006816,NM_001003258,NM_001101309	LMAN2	0.000147495	2	2	2	4.7e-05	TRUE
ENST00000507810,ENST00000261486,ENST00000509342,ENST00000515047,ENST00000513333,ENST00000511790,ENST00000511405,ENST00000512395,ENST00000305368,ENST00000514203	NM_022140,NM_001105384	EPB41L4A	0.000147495	1	9	2	2.48e-12	TRUE
ENST00000524543,ENST00000299596,ENST00000528080,ENST00000533867,ENST00000527813,ENST00000533723	NM_001008469,NM_001131923,NR_028491,NM_001165030,NM_015012,NM_001099156	TMEM41B	0.000147495	1	7	2	0.00283765	TRUE
ENST00000343882,ENST00000406360,ENST00000540898	NM_001455,NM_201559,NM_001135959,NM_001206083,NM_001267889	FOXO3	0.000147495	1	8	2	0.000461939	TRUE
ENST00000376279,ENST00000376286,ENST00000376285,ENST00000485946,ENST00000424527,ENST00000443601,ENST00000458283,ENST00000413170,ENST00000428969	NM_001178004,NM_000282,NM_001127692,NM_001083509	PCCA	0.000147495	1	10	2	1.88e-06	TRUE
ENST00000546500,ENST00000547566,ENST00000547708,ENST00000547870,ENST00000330752,ENST00000340913,ENST00000551702,ENST00000547276,ENST00000548688,ENST00000550994,ENST00000550482,ENST00000551679,ENST00000551665,ENST00000551803	NM_001042783,NM_001197111,NM_001077218,NM_001045911,NM_002136,NM_031157,NM_001242509	HNRNPA1	0.000154808	5	4	2	9.86e-38	TRUE
ENST00000444945,ENST00000406078	NR_002944	HNRNPA1P10	0.000154808	2	4	2	1.13e-37	TRUE
ENST00000307365,ENST00000473155,ENST00000471240	NM_019058,NM_001075922,NM_001243452,NM_001257796	DDIT4	0.00016086	7	5	2	7.7e-16	TRUE
ENST00000457196,ENST00000404141,ENST00000464717,ENST00000397192,ENST00000473219,ENST00000485730,ENST00000475066,ENST00000494182,ENST00000419436	NM_007349,NM_001077917	PAXIP1	0.00016086	2	2	2	0.000135121	TRUE
ENST00000238823,ENST00000474985,ENST00000403368,ENST00000441530,ENST00000475122,ENST00000492649,ENST00000498340,ENST00000464415,ENST00000431950	NM_001031057,NM_001133125,NM_015475,NM_001083455,NM_001246541,NM_001267029	FAM98A	0.00016086	1	1	2	7.12e-30	TRUE
UNKNOWN	NR_003262	FDPSL2A	0.00016086	1	1	2	4.31e-13	TRUE
ENST00000450390,ENST00000347370,ENST00000349431,ENST00000348298,ENST00000339385,ENST00000400929,ENST00000464036,ENST00000360466,ENST00000400930,ENST00000467339,ENST00000473215,ENST00000435198,ENST00000509720,ENST00000491779,ENST00000466752,ENST00000503294,ENST00000477894,ENST00000471154,ENST00000422076,ENST00000502382,ENST00000461142,ENST00000488418	NM_194458,NM_058167,NM_194315,NM_194457,NM_001038043	UBE2J2	0.00016086	3	6	2	0.000810623	TRUE
ENST00000546424,ENST00000348549,ENST00000333868,ENST00000400777,ENST00000424908,ENST00000375890,ENST00000474305,ENST00000447522,ENST00000440484,ENST00000546969,ENST00000469637	NM_001229,NM_032996,NM_001031633,NM_001205504	CASP9	0.00016086	2	8	2	0.000678117	TRUE
ENST00000462274,ENST00000338785,ENST00000426672,ENST00000455097,ENST00000451934,ENST00000321219,ENST00000339659,ENST00000398960,ENST00000498351,ENST00000398956,ENST00000455387	NM_204550,NM_001396,NM_130436,NM_130438,NM_101395,NM_001206014,NM_001258143	DYRK1A	0.00016086	3	14	2	1.95e-12	TRUE
ENST00000262305,ENST00000457159,ENST00000434585,ENST00000450428,ENST00000452814,ENST00000449879,ENST00000483002,ENST00000412256,ENST00000495663,ENST00000487899,ENST00000461009,ENST00000464263	NM_001168822,NM_014700,NM_001142272	RAB11FIP3	0.00016086	6	8	2	0.00019953	TRUE
ENST00000453195,ENST00000454678,ENST00000437089,ENST00000480999,ENST00000416596,ENST00000418026,ENST00000434785,ENST00000487829,ENST00000471458,ENST00000456770,ENST00000439094,ENST00000425523,ENST00000422802,ENST00000438064,ENST00000453442,ENST00000440149,ENST00000484938,ENST00000436219,ENST00000455000,ENST00000438908,ENST00000493978,ENST00000446196,ENST00000451189,ENST00000422881,ENST00000435387…	NM_001114967,NM_001044376,NM_003449,NM_001123209,NM_001242783	TRIM26	0.00016086	1	1	2	1.81e-27	TRUE
ENST00000425780,ENST00000451769,ENST00000456590,ENST00000307569,ENST00000324432,ENST00000446600,ENST00000457529,ENST00000492339,ENST00000413936,ENST00000423646,ENST00000438930,ENST00000430490,ENST00000442516,ENST00000429179,ENST00000435861,ENST00000472426,ENST00000446820,ENST00000467729,ENST00000435251,ENST00000479915,ENST00000468546,ENST00000465488	NM_020892,NM_001102596,NM_001102594,NM_001102595,NM_001017945	DTX2	0.00016086	12	7	2	0.000235891	TRUE
ENST00000341942,ENST00000474141,ENST00000460732,ENST00000474831,ENST00000441173,ENST00000494136,ENST00000468582,ENST00000488241,ENST00000473459,ENST00000466498,ENST00000488338,ENST00000490633	NM_001008395,NM_001166607	LAMTOR4	0.00016086	1	3	2	1.51e-12	TRUE
ENST00000421564,ENST00000331758,ENST00000450482,ENST00000370848,ENST00000491916,ENST00000492466	NM_198935,NM_001078095	SS18L1	0.00016086	9	9	2	9.05e-06	TRUE
ENST00000270458	NM_031895	CACNG8	0.00016086	4	13	2	3.19e-39	TRUE
ENST00000394908,ENST00000394906,ENST00000580805,ENST00000585169,ENST00000577789,ENST00000584569,ENST00000586827,ENST00000465427,ENST00000593158,ENST00000580313,ENST00000582174,ENST00000581509	NM_001030719,NM_004475,NM_001035466	FLOT2	0.00016086	2	6	2	0.002624	TRUE
ENST00000566780,ENST00000569332,ENST00000539474,ENST00000406884,ENST00000402655,ENST00000566662,ENST00000562214,ENST00000569818,ENST00000355860,ENST00000408984,ENST00000565562,ENST00000561846,ENST00000563358,ENST00000562639,ENST00000565791,ENST00000566103	NM_001030574,NM_001132377,NM_016373,NM_130844,NM_130791,NM_001078092	WWOX	0.000162393	2	13	2	0.00032384	TRUE
ENST00000536985,ENST00000379789,ENST00000540253,ENST00000379785,ENST00000477914,ENST00000490474,ENST00000467491,ENST00000461744,ENST00000317350,ENST00000379782,ENST00000360521,ENST00000379775,ENST00000450232,ENST00000487989,ENST00000441697,ENST00000414237,ENST00000475881	NM_001135487,NM_001132491,NM_004566,NM_001145443,NM_001077837	PFKFB3	0.000162393	2	9	2	7.95e-05	TRUE
ENST00000333274,ENST00000510359,ENST00000509503,ENST00000504941,ENST00000505499	NM_205184,NM_001962,NM_001076432,NM_001265728	EFNA5	0.000169413	4	23	2	0.000133746	TRUE
ENST00000361131	NM_030949,NM_001078068	PPP1R14C	0.000169413	1	4	2	2.85e-05	TRUE
ENST00000409134,ENST00000447989,ENST00000553117,ENST00000485852,ENST00000497231,ENST00000476328,ENST00000503281,ENST00000509459,ENST00000433026,ENST00000413020,ENST00000458249,ENST00000510111,ENST00000511266,ENST00000509270,ENST00000479989,ENST00000412186	NM_001182,NM_001201377,NM_001202404,NM_001045969	ALDH7A1	0.000169413	1	5	2	1.07e-24	TRUE
ENST00000460265,ENST00000261366,ENST00000504788,ENST00000472034,ENST00000492190,ENST00000395354,ENST00000463908,ENST00000494185,ENST00000512460	NM_205286,NM_005573,NM_001198557,NM_001103295,NM_001260848	LMNB1	0.000173296	4	9	2	1.7e-24	TRUE
ENST00000550522,ENST00000293618,ENST00000429001,ENST00000548174,ENST00000548697,ENST00000548993,ENST00000398473,ENST00000522085,ENST00000518444,ENST00000551886,ENST00000523389,ENST00000518561,ENST00000347328,ENST00000550260,ENST00000517559,ENST00000552445,ENST00000520064,ENST00000521120	NM_001012700,NM_052879,NM_199188,NM_199190,NM_001170803,NM_001170804,NM_001170808,NR_033200,NM_001101189	LARP4	0.000175162	1	10	2	0.00790379	TRUE
ENST00000588752,ENST00000589238,ENST00000269159,ENST00000590107,ENST00000383376,ENST00000590138,ENST00000588927,ENST00000588863,ENST00000588167,ENST00000586230,ENST00000589374	NM_014214,NM_001192282,NM_001258195	IMPA2	0.000175162	4	16	2	2.41e-12	TRUE
ENST00000252744	NM_020928	ZSWIM6	0.000175162	2	14	2	5.24e-05	TRUE
ENST00000233146,ENST00000543555,ENST00000454849,ENST00000406134,ENST00000461394,ENST00000467323	NM_113607,NM_000251,NM_001195357,NM_001034584,NM_001183344,NM_001247138,NM_001258281	MSH2	0.000175162	1	5	2	2.51e-05	TRUE
ENST00000585664,ENST00000585922,ENST00000429461,ENST00000321562,ENST00000489591,ENST00000487489,ENST00000455106,ENST00000544340,ENST00000490938,ENST00000464180	NM_021939,NM_001046403,NM_001243807,NM_001260551	FKBP10	0.000186446	1	2	2	1.68e-07	TRUE
ENST00000557682,ENST00000553829,ENST00000556895,ENST00000554669,ENST00000554894,ENST00000557147,ENST00000556722,ENST00000554133,ENST00000555227,ENST00000556930,ENST00000555520,ENST00000394196,ENST00000557381,ENST00000309818,ENST00000420239,ENST00000554771,ENST00000554122,ENST00000536619,ENST00000556270,ENST00000553323,ENST00000555753,ENST00000555582,ENST00000557340,ENST00000557116,ENST00000553402…	NM_001133821,NM_001042572,NM_001271,NM_001102181	CHD2	0.000189456	1	24	2	2.18e-06	TRUE
ENST00000337198,ENST00000347770,ENST00000518697,ENST00000523071,ENST00000521536,ENST00000522311,ENST00000520402,ENST00000518353,ENST00000518940,ENST00000517581	NM_001008729,NM_001132849,NM_015878,NM_148174,NM_001128488,NM_001082611,NM_001260734	AZIN1	0.000189456	1	4	2	3.16e-10	TRUE
ENST00000358625,ENST00000425041	NM_001006198,NM_017588,NM_052821,NM_001105475	WDR5	0.000189456	1	4	2	0.00112803	TRUE
ENST00000493030,ENST00000284551,ENST00000460651,ENST00000602582,ENST00000475775,ENST00000366699,ENST00000602308	NM_145214,NM_001077920,NM_001261480	TRIM11	0.000189456	1	4	2	7.4e-07	TRUE
ENST00000382902,ENST00000307050,ENST00000560536,ENST00000558371,ENST00000560598	NM_130901,NM_001206968	OTUD7A	0.000189456	1	3	2	0.000128338	TRUE
ENST00000554411,ENST00000258807,ENST00000336557,ENST00000556756,ENST00000555471,ENST00000555817	NM_001194894,NM_014430,NM_001034567	CIDEB	0.000189456	2	8	2	1.27e-33	TRUE
ENST00000249806,ENST00000565471,ENST00000418702,ENST00000567060,ENST00000566347,ENST00000538696,ENST00000564752,ENST00000563917,ENST00000564846,ENST00000569336	NM_017882,NM_001011888,NM_001109984,NM_001040289,NM_001243614	CLN6	0.000189456	2	10	2	0.000712393	TRUE
ENST00000361156,ENST00000347108,ENST00000361396,ENST00000376829,ENST00000485031,ENST00000479518,ENST00000466569,ENST00000466027	NM_014934,NM_198968,NM_001166008,NM_001110066	DZIP1	0.000189456	2	4	2	1.5e-05	TRUE
ENST00000368457,ENST00000368456,ENST00000483463	NM_001133038,NM_138300,NM_001185175,NM_001102242	PYGO2	0.000195728	1	2	2	2.73e-06	TRUE
ENST00000453558,ENST00000455957,ENST00000602591,ENST00000602550,ENST00000438412,ENST00000426882,ENST00000454269,ENST00000454129,ENST00000449544,ENST00000444126,ENST00000412685,ENST00000602698,ENST00000602861,ENST00000413358,ENST00000602290,ENST00000602319,ENST00000602516,ENST00000602498,ENST00000453219,ENST00000421520,ENST00000448291,ENST00000414569,ENST00000438668,ENST00000429862,ENST00000423157…	NR_024052,NR_024053	HCG18	0.000195728	1	12	2	8.97e-15	TRUE
ENST00000442092,ENST00000266022,ENST00000443081,ENST00000539992,ENST00000419610,ENST00000441115,ENST00000493652,ENST00000422955,ENST00000454079,ENST00000425608,ENST00000434592,ENST00000433811,ENST00000491874,ENST00000488807,ENST00000464013,ENST00000483350,ENST00000446471,ENST00000466247,ENST00000478026,ENST00000438912,ENST00000421682	NM_001030588,NM_005777,NM_001167582	RBM6	0.000195728	1	13	2	7.52e-07	TRUE
ENST00000306085,ENST00000412507,ENST00000467847,ENST00000487252	NM_030961,NM_001206574,NM_001257087	TRIM56	0.000195728	2	2	2	1.59e-18	TRUE
ENST00000357429,ENST00000397100,ENST00000397098,ENST00000412051,ENST00000488073,ENST00000444428,ENST00000491163,ENST00000465681	NM_032350,NM_001134396,NM_001134395	C7orf50	0.000195728	3	16	2	0.000898988	TRUE
ENST00000367504,ENST00000367506,ENST00000465827,ENST00000458395,ENST00000487028	NM_001133219,NM_001098121,NM_030934,NM_001202423,NM_001260768	TRMT1L	0.000195728	1	1	2	5.17e-05	TRUE
ENST00000397661,ENST00000592199,ENST00000590027,ENST00000585382,ENST00000587760,ENST00000585575,ENST00000360105,ENST00000588228,ENST00000586797,ENST00000591028,ENST00000586873,ENST00000587260,ENST00000358552,ENST00000588680	NM_205270,NM_002501,NM_001271044,NM_001271043	NFIX	0.000195728	2	18	2	0.00693546	TRUE
ENST00000272433,ENST00000461352,ENST00000474528,ENST00000495208,ENST00000482289,ENST00000490056,ENST00000411783,ENST00000410065,ENST00000482542,ENST00000463277,ENST00000416579,ENST00000464825,ENST00000450185,ENST00000442582,ENST00000487508,ENST00000497144,ENST00000479293,ENST00000485057,ENST00000475630,ENST00000472259,ENST00000484123,ENST00000488839	NM_144579,NM_001075914	SFXN5	0.000202916	1	17	2	1.92e-05	TRUE
ENST00000490906,ENST00000460222,ENST00000495046,ENST00000472470,ENST00000485561,ENST00000484871,ENST00000489776,ENST00000467035,ENST00000484156,ENST00000477018,ENST00000497046,ENST00000491643,ENST00000498493,ENST00000476156,ENST00000462876,ENST00000478226,ENST00000465451,ENST00000222693,ENST00000343213,ENST00000393480,ENST00000495841	NM_001007086,NM_001168619,NM_001168712,NM_001135826,NM_001168534,NM_001233,NM_198212,NM_001010997,NM_001168694,NM_001114144,NM_001123091,NM_001007808,NM_001195310,NM_001171022,NM_001206747,NM_001206748	CAV2	0.000202916	1	1	2	1.58e-06	TRUE
UNKNOWN	NR_040091,NR_040092	LOC100506990	0.000202916	3	26	2	5.75e-22	TRUE
ENST00000540693,ENST00000379274,ENST00000261491,ENST00000337343,ENST00000536612,ENST00000498255,ENST00000538674,ENST00000489851	NM_001204504,NM_152910,NM_178009,NM_001204505,NM_001204506	DGKH	0.000202916	2	7	2	5.59e-05	TRUE
ENST00000322357,ENST00000601588	NM_204680,NM_015898,NM_001191247	ZBTB7A	0.000211175	3	9	2	0.00183841	TRUE
ENST00000406875,ENST00000428878,ENST00000342645	NM_001113239,NM_022740,NM_001014769,NM_001101922	HIPK2	0.000211175	1	18	2	0.000941836	TRUE
ENST00000404875,ENST00000423007,ENST00000341012,ENST00000441334,ENST00000372228,ENST00000419118,ENST00000402686,ENST00000541219,ENST00000354713,ENST00000418774,ENST00000415075,ENST00000448212,ENST00000483472,ENST00000430619,ENST00000462375,ENST00000485278,ENST00000372220,ENST00000467848,ENST00000494883	NM_001030685,NM_001135380,NM_001133054,NM_001136113,NM_007171,NM_001077365,NM_001077366,NM_001136114,NM_001080330,NM_001246645	POMT1	0.000211175	1	3	2	2.83e-07	TRUE
ENST00000263284,ENST00000595358,ENST00000596161,ENST00000594672,ENST00000596687,ENST00000536603,ENST00000594087,ENST00000599044,ENST00000601763	NM_001006546,NM_001267723	CCDC61	0.000211175	2	5	2	9.23e-09	TRUE
UNKNOWN	NR_029426	SMA4	0.000212031	1	4	2	4.65e-05	TRUE
ENST00000392038,ENST00000483166,ENST00000476266,ENST00000489375,ENST00000391844,ENST00000496089,ENST00000476247,ENST00000424901,ENST00000584288,ENST00000311278,ENST00000497948,ENST00000579047,ENST00000578615,ENST00000391845,ENST00000480878,ENST00000579345,ENST00000578282,ENST00000486647,ENST00000580878,ENST00000578310,ENST00000601166,ENST00000492463,ENST00000537834,ENST00000491778,ENST00000578975…	NM_001173979,NM_001626,NM_001012340,NM_001206146,NM_001243027,NM_001243028,NM_001256779,NM_001265989	AKT2	0.000212031	3	9	2	7.07e-06	TRUE
ENST00000368655	NM_020699,NM_001192047	GATAD2B	0.000212031	2	8	2	8.94e-07	TRUE
ENST00000375048,ENST00000602624,ENST00000415136,ENST00000475210,ENST00000464364,ENST00000477229	NM_001168008,NM_005216,NM_001003321,NM_001101073	DDOST	0.000212031	2	3	2	1.13e-15	TRUE
ENST00000460736,ENST00000379619,ENST00000264716,ENST00000436647,ENST00000545753	NM_001045836,NM_005253,NM_001192950,NM_001260911	FOSL2	0.000212031	7	18	2	0.00135756	TRUE
ENST00000373449,ENST00000548033,ENST00000482191,ENST00000491241,ENST00000467905,ENST00000354858,ENST00000480134,ENST00000550338,ENST00000469238,ENST00000466029,ENST00000487289,ENST00000548559,ENST00000551979	NM_001131371,NR_037592,NR_037591,NM_013411,NM_001199199,NM_001625,NM_173889,NM_001261078	AK2	0.000212031	3	7	2	4.2e-22	TRUE
ENST00000373242,ENST00000373241,ENST00000373239,ENST00000373238,ENST00000431664,ENST00000458634,ENST00000452767,ENST00000373236,ENST00000477464	NM_001133372,NM_001142648,NM_020150,NM_001031786,NM_001034521	SAR1A	0.000212031	1	3	2	3.26e-06	TRUE
ENST00000357022,ENST00000463681,ENST00000489653,ENST00000394457,ENST00000471542,ENST00000493310,ENST00000493628,ENST00000487904,ENST00000484217,ENST00000410073,ENST00000491217	NM_001199418,NM_152392,NM_001102134,NM_001245647	AHSA2	0.000212031	4	3	2	1.91e-05	TRUE
ENST00000355937,ENST00000371033,ENST00000463057,ENST00000466051	NM_001030866,NM_016045,NM_001113697,NM_001035476,NM_001256403	SLMO2	0.000212031	5	9	2	1.03e-07	TRUE
ENST00000282441,ENST00000526343,ENST00000345877,ENST00000537274,ENST00000531439,ENST00000524575,ENST00000526594,ENST00000529029,ENST00000528834	NM_205243,NM_001130145,NM_006106,NM_001195044,NM_001195045,NM_001182362,NM_001267881	YAP1	0.000212031	5	9	2	7.04e-21	TRUE
ENST00000253031,ENST00000586748,ENST00000592646,ENST00000589971,ENST00000591872,ENST00000590329,ENST00000586575,ENST00000587943,ENST00000588347,ENST00000585858,ENST00000588962,ENST00000592505	NM_024029,NM_001101094	YIPF2	0.000212031	2	2	2	4.52e-10	TRUE
ENST00000292894,ENST00000538849,ENST00000522483,ENST00000524106	NM_001194201,NM_152658,NM_001102200	THAP8	0.000219415	1	1	2	1.55e-13	TRUE
ENST00000591096,ENST00000486493,ENST00000592136,ENST00000593123,ENST00000587023,ENST00000474578,ENST00000427569,ENST00000483535,ENST00000486664,ENST00000478040,ENST00000491665,ENST00000450475,ENST00000441280,ENST00000430739,ENST00000591910,ENST00000483774,ENST00000436545,ENST00000416949,ENST00000492036	NM_001105482,NM_001038073,NM_001261434	AARSD1	0.000219415	1	6	2	6.07e-17	TRUE
ENST00000367306,ENST00000532313,ENST00000527662,ENST00000533402,ENST00000340006,ENST00000531916,ENST00000532460,ENST00000526256,ENST00000533432,ENST00000530120,ENST00000526317,ENST00000526723,ENST00000524951,ENST00000458271,ENST00000527573,ENST00000529975,ENST00000533188,ENST00000471596,ENST00000481851	NM_205248,NM_001131739,NM_001193572,NM_001193570,NM_001193571,NM_004078,NM_001083771,NM_001257285	CSRP1	0.000219415	2	11	2	7.82e-06	TRUE
ENST00000264670,ENST00000539938,ENST00000504374,ENST00000505892,ENST00000513888,ENST00000506139,ENST00000514127,ENST00000502932,ENST00000507888,ENST00000505264	NM_001031004,NM_001193455,NR_037947,NM_017755	NSUN2	0.000219415	4	5	2	7.17e-08	TRUE
ENST00000264935,ENST00000444221,ENST00000512038,ENST00000499639,ENST00000514507	NM_018140	CEP72	0.000219415	2	10	2	0.000141184	TRUE
ENST00000360221,ENST00000409399,ENST00000409103,ENST00000421990,ENST00000423601,ENST00000452752,ENST00000454303	NM_025267,NM_001136042	PTGES3L-AARSD1	0.000219415	1	8	2	5.81e-15	TRUE
ENST00000083182,ENST00000589341,ENST00000592995,ENST00000590244,ENST00000588668,ENST00000585368	NM_001030723,NM_001131419,NM_006380,NM_001261507	APPBP2	0.000219415	1	2	2	0.00429434	TRUE
ENST00000481752,ENST00000288986,ENST00000491539,ENST00000485096,ENST00000476286,ENST00000478862,ENST00000460960,ENST00000488930,ENST00000496489,ENST00000469404,ENST00000467911,ENST00000482071	NM_001131230,NM_006153,NM_001190796,NM_001137630,NM_001076072,NM_001166199,NM_001246580,NM_001257480	NCK1	0.000219415	1	4	2	0.000244051	TRUE
ENST00000525734,ENST00000533153,ENST00000278935,ENST00000525416,ENST00000527609,ENST00000533570,ENST00000533675,ENST00000533706,ENST00000529153,ENST00000533223,ENST00000528706,ENST00000532187,ENST00000533433	NM_014956	CEP164	0.000219415	1	4	2	0.000760371	TRUE
ENST00000550997,ENST00000549538,ENST00000549412,ENST00000550643,ENST00000548654,ENST00000548710,ENST00000549179,ENST00000548377,ENST00000549298,ENST00000549375,ENST00000553127,ENST00000321898,ENST00000551540,ENST00000552918,ENST00000548777,ENST00000552171,ENST00000547865,ENST00000548388,ENST00000549045,ENST00000552557,ENST00000552655,ENST00000548727,ENST00000547003	NM_023071,NM_001193175	SPATS2	0.000219415	2	10	2	0.00573363	TRUE
ENST00000376874,ENST00000340724,ENST00000544468	NM_178314,NM_001075226	RILPL1	0.000227937	3	6	2	5.11e-10	TRUE
ENST00000378847,ENST00000487696,ENST00000378845	NM_020397,NM_153498,NM_001243935	CAMK1D	0.000227937	2	44	2	0.000142801	TRUE
ENST00000434513,ENST00000452522,ENST00000361221,ENST00000375415,ENST00000375420,ENST00000482892,ENST00000469726,ENST00000375408,ENST00000167825,ENST00000475356,ENST00000482359,ENST00000466782,ENST00000495593	NM_001134135,NM_001011722,NM_018125,NM_001046297	ARHGEF10L	0.000227937	1	11	2	0.00580995	TRUE
ENST00000313708,ENST00000518836,ENST00000519739,ENST00000519890,ENST00000518323,ENST00000380654,ENST00000517373,ENST00000522192,ENST00000523464,ENST00000523315	NM_128106,NM_204752,NM_024007,NM_001192916,NM_001247929	EBF1	0.000227937	1	2	2	0.000615075	TRUE
UNKNOWN	NR_038253,NR_038254,NR_038255	LOC100288637	0.000227937	3	18	2	6.5e-13	TRUE
ENST00000256429,ENST00000579025,ENST00000578272,ENST00000398398,ENST00000583046	NM_001012403,NM_003927,NM_015832	MBD2	0.000227937	1	4	2	2.23e-22	TRUE
ENST00000355387,ENST00000361799,ENST00000487332,ENST00000372247,ENST00000470498,ENST00000443020,ENST00000496262,ENST00000453863,ENST00000335497,ENST00000440132,ENST00000474064,ENST00000471494,ENST00000488865,ENST00000497469,ENST00000475378,ENST00000484745,ENST00000474394,ENST00000480686,ENST00000474956	NM_001012599,NM_001109987,NM_001131864,NM_018150,NM_001076941	RNF220	0.000227937	3	29	2	0.00285902	TRUE
ENST00000553612,ENST00000298173,ENST00000434192,ENST00000556268	NM_001031207,NM_001131737,NM_015859,NM_201595,NM_001191217,NM_001257710,NR_048573	GTF2A1	0.000227937	1	2	2	0.00061894	TRUE
ENST00000425708,ENST00000396077,ENST00000460529,ENST00000474600	NM_181489,NM_001205819	ZNF445	0.000227937	1	4	2	6.23e-05	TRUE
ENST00000285737,ENST00000535754,ENST00000416006,ENST00000566755,ENST00000570174,ENST00000565867,ENST00000564259	NM_001199220,NM_001133043,NM_031490,NM_001034723	LONP2	0.000236975	1	4	2	7.92e-09	TRUE
ENST00000380958,ENST00000503791,ENST00000399613,ENST00000483842,ENST00000282391	NM_175854,NM_001179591	PAN3	0.000236975	1	6	2	5.71e-05	TRUE
ENST00000264498	NM_205433,NM_001110241,NM_002006,NM_001195221,NM_174056,NM_001009769,NM_001033976	FGF2	0.000236975	1	7	2	1.47e-09	TRUE
ENST00000417257,ENST00000402883,ENST00000421674,ENST00000458630,ENST00000484674,ENST00000449926,ENST00000558108,ENST00000451277,ENST00000473965,ENST00000479319,ENST00000456571	NM_032892,NM_001206201	FRMD5	0.000246977	3	15	2	5.57e-06	TRUE
ENST00000512351,ENST00000510778,ENST00000506956,ENST00000512671,ENST00000342295,ENST00000345843,ENST00000361572,ENST00000514380,ENST00000514807,ENST00000348160,ENST00000509158,ENST00000355476,ENST00000513182,ENST00000511401,ENST00000515023,ENST00000505958,ENST00000507561,ENST00000514730,ENST00000507574,ENST00000514675,ENST00000515573,ENST00000511546,ENST00000342320,ENST00000504907,ENST00000514656…	NM_015874,NM_203283,NM_005349,NM_203284,NM_001077001,NM_001260693	RBPJ	0.000246977	1	11	2	5.23e-12	TRUE
ENST00000358994,ENST00000455292,ENST00000393370,ENST00000337738,ENST00000348141,ENST00000452489,ENST00000357197,ENST00000347048,ENST00000445241,ENST00000355007,ENST00000414331,ENST00000417728,ENST00000453358,ENST00000417504,ENST00000440346,ENST00000455240,ENST00000411917,ENST00000423100,ENST00000524946,ENST00000414510,ENST00000436883,ENST00000432124,ENST00000435305,ENST00000419582,ENST00000432651…	NM_001031371,NM_001169081,NM_001131523,NM_178001,NM_021131,NM_178003,NM_178000,NM_001193397,NM_001046173,NM_001082680	PPP2R4	0.000246977	7	10	2	0.000358807	TRUE
UNKNOWN	NR_045214	LOC100507373	0.000246977	2	12	2	2.48e-18	TRUE
ENST00000373275,ENST00000473691,ENST00000497335,ENST00000487313,ENST00000478415	NM_153252,NM_170139	BRWD3	0.000254958	1	3	2	2.16e-10	TRUE
ENST00000375442,ENST00000553557,ENST00000579390,ENST00000578306,ENST00000556808,ENST00000463525	NM_022117	TSPYL2	0.000254958	1	2	2	6.06e-07	TRUE
ENST00000420646,ENST00000394989,ENST00000345009,ENST00000336904,ENST00000394991,ENST00000394986,ENST00000508895,ENST00000506244,ENST00000505199,ENST00000502987,ENST00000506691	NM_204673,NM_001009158,NM_001135542,NM_000345,NM_007308,NM_001146054,NM_001146055,NM_001037145,NM_001034041,NM_001048253,NM_001252184	SNCA	0.000254958	1	14	2	2.08e-20	TRUE
ENST00000448820,ENST00000541515,ENST00000354926,ENST00000435096,ENST00000456182,ENST00000541170,ENST00000263545,ENST00000463912,ENST00000498518,ENST00000482860	NM_001030755,NM_016019,NM_001131056,NM_001270643,NM_001244585	LUC7L2	0.000254958	2	12	2	2.57e-11	TRUE
ENST00000299164	NM_139055,NM_001192390	ADAMTS15	0.000254958	1	7	2	4.58e-05	TRUE
ENST00000303635,ENST00000490738,ENST00000476163,ENST00000473578,ENST00000557126,ENST00000467404,ENST00000439411,ENST00000461311,ENST00000486138,ENST00000482934,ENST00000470648,ENST00000461580,ENST00000472283,ENST00000467267,ENST00000495233,ENST00000490905,ENST00000476864	NM_015215,NM_001195563,NM_001242701,NR_038934	CAMTA1	0.000254958	2	36	2	3.5e-16	TRUE
ENST00000382192,ENST00000219091,ENST00000444510,ENST00000414351,ENST00000570935	NM_003456,NM_001042428,NM_001034473,NM_001243641	ZNF205	0.000254958	1	1	2	1.41e-24	TRUE
ENST00000376180,ENST00000478675,ENST00000545560,ENST00000376162,ENST00000474233,ENST00000490242	NM_004791,NM_001206834	ITGBL1	0.000254958	1	3	2	2.69e-17	TRUE
UNKNOWN	NM_001244584	C7orf55-LUC7L2	0.000254958	2	12	2	1.72e-11	TRUE
ENST00000240100,ENST00000240101	NM_204838,NM_001394,NM_057158,NM_001206953	DUSP4	0.000254958	1	1	2	1.21e-09	TRUE
ENST00000217402	NM_001006286,NM_176812,NM_001128506	CHMP4B	0.000263617	2	11	2	1.67e-32	TRUE
ENST00000370200,ENST00000477979,ENST00000470106,ENST00000477267,ENST00000465807	NM_030929,NM_001244551	KAZALD1	0.000263617	1	4	2	1.62e-08	TRUE
ENST00000324464,ENST00000450541,ENST00000593724,ENST00000243583,ENST00000595254,ENST00000596455,ENST00000599643,ENST00000601304,ENST00000601967,ENST00000601451,ENST00000600080,ENST00000593544,ENST00000594490,ENST00000594084,ENST00000594720,ENST00000600707,ENST00000596357,ENST00000593723	NM_001142555,NM_024876,NM_001265945	ADCK4	0.000263617	1	5	2	6.84e-20	TRUE
ENST00000263895,ENST00000375734,ENST00000409557,ENST00000497865,ENST00000473639,ENST00000466334,ENST00000472416,ENST00000439275,ENST00000454202	NM_001132475,NM_005168,NM_214296,NM_001191158,NM_001254738,NM_001261682	RND3	0.000263617	3	3	2	9.92e-05	TRUE
ENST00000353868,ENST00000393232,ENST00000539636,ENST00000477428,ENST00000454688,ENST00000311967,ENST00000223190,ENST00000393230,ENST00000393231	NM_001030646,NM_005011,NM_001040110,NM_001098002	NRF1	0.000263617	1	9	2	0.0028513	TRUE
ENST00000326080,ENST00000423554,ENST00000524250,ENST00000517938,ENST00000520581,ENST00000521518,ENST00000524363,ENST00000522825,ENST00000519501,ENST00000519258,ENST00000523997,ENST00000518651,ENST00000520968,ENST00000517448,ENST00000517874,ENST00000520461	NM_032385	C5orf4	0.000263617	2	3	2	9.74e-05	TRUE
ENST00000414478,ENST00000272203,ENST00000485632,ENST00000564627	NM_014935,NM_001075973	PLEKHA6	0.000263617	4	23	2	2.3e-05	TRUE
ENST00000441788,ENST00000588327,ENST00000591290,ENST00000313639,ENST00000395095,ENST00000592214,ENST00000586212,ENST00000588084	NM_204154,NM_016263,NM_001136197,NM_001136198,NM_001012296,NM_001037609,NM_001258128	FZR1	0.000263617	1	7	2	3.34e-05	TRUE
ENST00000359314,ENST00000477159,ENST00000463175,ENST00000479857,ENST00000486693	NM_001132276,NM_012120,NM_001206539,NM_001266309	CD2AP	0.000263617	1	2	2	0.0085132	TRUE
ENST00000395474,ENST00000429900,ENST00000488572,ENST00000462064,ENST00000489684,ENST00000473238,ENST00000438660,ENST00000415265,ENST00000452875,ENST00000420783,ENST00000471162,ENST00000472878,ENST00000448293,ENST00000419837,ENST00000461687,ENST00000489427,ENST00000491365,ENST00000498023,ENST00000492780	NM_001133897,NM_018031,NM_001105623,NM_001261701	WDR6	0.000272291	3	5	2	0.000131629	TRUE
ENST00000581959,ENST00000392563,ENST00000392564,ENST00000392562,ENST00000316804,ENST00000316615,ENST00000578961,ENST00000462266,ENST00000582582,ENST00000583912,ENST00000577711	NM_204411,NM_001133482,NM_203506,NM_002086,NM_001137628,NM_001034630,NM_001246617	GRB2	0.000272291	1	4	2	4.72e-14	TRUE
ENST00000473637,ENST00000335255,ENST00000527313,ENST00000570585,ENST00000531030,ENST00000526383,ENST00000571160,ENST00000575578,ENST00000571989,ENST00000529652,ENST00000576131,ENST00000574694	NM_004514	FOXK2	0.000272291	1	11	2	0.00687655	TRUE
ENST00000305786,ENST00000409409,ENST00000409764,ENST00000413447	NM_001079478,NM_001071821,NM_001131167,NM_018947,NM_001197045,NM_001164014,NM_001129970,NM_001046061,NM_001143673	CYCS	0.000272291	1	2	2	0.000358715	TRUE
ENST00000492714,ENST00000446845,ENST00000311806,ENST00000426620,ENST00000483695,ENST00000467900	NM_001133533,NM_005109,NM_214342,NM_001075892,NM_001257780	OXSR1	0.000272291	1	5	2	3.1e-22	TRUE
ENST00000340825,ENST00000379672,ENST00000580768,ENST00000544416,ENST00000262444,ENST00000578442,ENST00000538915,ENST00000583608,ENST00000578087,ENST00000581437,ENST00000584974,ENST00000579746	NM_014859	ARHGAP44	0.00027916	1	7	2	0.00147788	TRUE
ENST00000478993,ENST00000399959,ENST00000441189,ENST00000457138,ENST00000480592,ENST00000542215	NM_001030800,NM_001193416,NM_001193417,NM_001356,NM_001192962,NM_001246203	DDX3X	0.00027916	3	4	2	9.52e-13	TRUE
ENST00000307198,ENST00000435085,ENST00000419228,ENST00000538413,ENST00000535883,ENST00000447974,ENST00000289488,ENST00000539271,ENST00000412777,ENST00000423494,ENST00000539587,ENST00000538478,ENST00000544409,ENST00000427369,ENST00000439209,ENST00000324866,ENST00000542846,ENST00000541614,ENST00000537483,ENST00000536917,ENST00000440313,ENST00000541899	NM_001136102,NM_001199354,NM_001136142,NM_001199353,NM_001144865,NM_001199358,NM_001199359,NM_145309,NM_001145308,NM_001145307,NM_001024545,NM_001205138,NM_001271471,NM_001145309,NM_001145310,NR_073187,NR_073188,NR_026886	LRTOMT	0.00027916	1	5	2	2.47e-08	TRUE
ENST00000297991,ENST00000493581,ENST00000494313,ENST00000463983,ENST00000473153	NM_004925,NM_001110172,NM_001079794,NM_001258043	AQP3	0.00027916	3	3	2	1.13e-19	TRUE
ENST00000298316	NM_102771,NM_001036038,NM_001081705,NM_001194058,NM_001663,NM_001078677,NM_001162548,NM_001247734	ARF6	0.00027916	2	3	2	3.18e-09	TRUE
ENST00000333425,ENST00000268043,ENST00000559239,ENST00000559872,ENST00000559522,ENST00000558380,ENST00000558547,ENST00000560444,ENST00000560504	NM_025049,NM_001182420,NM_001206052	PIF1	0.00027916	2	2	2	6.65e-08	TRUE
ENST00000545249,ENST00000535107,ENST00000278671,ENST00000544594,ENST00000538404,ENST00000535872,ENST00000539797,ENST00000541403	NM_001132939,NM_017907,NM_001034769	LAMTOR1	0.00027916	1	3	2	0.00716235	TRUE
ENST00000355857,ENST00000492375,ENST00000535757,ENST00000535617,ENST00000409094,ENST00000311521,ENST00000460901,ENST00000542275,ENST00000393103,ENST00000475783	NM_204576,NM_001079862,NM_001079863,NM_001178043,NM_001178041,NM_020548,NM_001178042,NM_001178017,NM_001197047,NM_214119,NM_001113321	DBI	0.00027916	1	1	2	3.09e-22	TRUE
ENST00000353904,ENST00000373998,ENST00000314425,ENST00000373988,ENST00000373984,ENST00000489332,ENST00000470832,ENST00000460139,ENST00000373982,ENST00000373981,ENST00000373978	NM_005096,NM_001171162,NM_201599,NM_001171163,NM_001193249,NM_001257934	ZMYM3	0.00027916	2	3	2	0.000191285	TRUE
ENST00000475622,ENST00000283415,ENST00000503252,ENST00000513757,ENST00000514484,ENST00000507282	NM_024830,NM_001206811	LPCAT1	0.000281219	10	10	2	9.91e-06	TRUE
ENST00000366618,ENST00000366617	NM_173508,NM_001192935	SLC35F3	0.000281219	2	33	2	5.55e-14	TRUE
ENST00000373290,ENST00000478112,ENST00000475069,ENST00000452130,ENST00000490083,ENST00000486093,ENST00000459981,ENST00000470508	NM_001006499,NM_012339,NM_001075829,NM_001266979	TSPAN15	0.000281219	1	6	2	3.21e-07	TRUE
ENST00000534312,ENST00000527926,ENST00000525763,ENST00000533181,ENST00000395850,ENST00000533403,ENST00000351554,ENST00000528987,ENST00000415002,ENST00000445143,ENST00000426650,ENST00000437761,ENST00000527577,ENST00000528700	NM_001133389,NM_001127223,NM_203329,NM_000611,NM_203330,NM_001127225,NM_001127226,NM_203331,NM_001127227,NM_214170,NM_001037446,NM_001082712,NM_001261705	CD59	0.000281219	1	5	2	0.00107208	TRUE
ENST00000592458,ENST00000545225,ENST00000590720,ENST00000586114,ENST00000585805,ENST00000541124,ENST00000441946,ENST00000592578,ENST00000591152,ENST00000589469,ENST00000543428,ENST00000591722,ENST00000293362,ENST00000592169,ENST00000586312,ENST00000593111	NM_001012550,NM_001131189,NM_005789,NM_176863,NM_214348,NM_001251895,NM_001267045,NR_049772	PSME3	0.000281219	1	4	2	0.0058055	TRUE
ENST00000394287,ENST00000300651,ENST00000577831,ENST00000584308,ENST00000581334	NM_004774,NM_001184167,NM_141084,NM_001202224,NM_001205876	MED1	0.000281219	1	3	2	2.47e-10	TRUE
ENST00000396671,ENST00000356447,ENST00000416420,ENST00000280696,ENST00000413780,ENST00000447875,ENST00000415021,ENST00000453729,ENST00000431815,ENST00000447414,ENST00000428492,ENST00000418247	NM_205447,NM_000461,NM_001128176,NM_001128177,NM_001252221,NM_001252634	THRB	0.000291437	1	8	2	0.00675633	TRUE
ENST00000432519,ENST00000334133,ENST00000483671,ENST00000451036,ENST00000495666,ENST00000484752,ENST00000470458,ENST00000449415,ENST00000441460,ENST00000453536,ENST00000431547	NM_204458,NM_015150	RFTN1	0.000291437	2	7	2	0.000142741	TRUE
ENST00000345506,ENST00000590949,ENST00000546010,ENST00000590726,ENST00000469124,ENST00000452307,ENST00000444283,ENST00000588868,ENST00000478897,ENST00000479417,ENST00000468096,ENST00000591556,ENST00000587646	NM_003152,NM_214290,NM_001012673,NM_001009402	STAT5A	0.000291437	2	15	2	0.000103133	TRUE
ENST00000371712	NM_001194013,NM_001077513,NM_019892,NM_001192090	INPP5E	0.000291437	1	4	2	5.67e-13	TRUE
ENST00000270288,ENST00000590071,ENST00000585928	NM_001080436,NM_001205562	WTIP	0.000301893	1	2	2	1.13e-05	TRUE
ENST00000515707,ENST00000513511,ENST00000285238,ENST00000427699,ENST00000505699,ENST00000502426,ENST00000515585,ENST00000513589,ENST00000571855,ENST00000515070,ENST00000503304,ENST00000510633,ENST00000506464,ENST00000513745,ENST00000510891,ENST00000503337,ENST00000508929,ENST00000504586	NM_001144070,NM_003786,NM_001192756	ABCC3	0.000301893	2	4	2	0.00627168	TRUE
UNKNOWN	NR_024278	LOC646762	0.000301893	1	4	2	1.15e-11	TRUE
ENST00000465139,ENST00000409628,ENST00000486054,ENST00000267918,ENST00000483551,ENST00000560303,ENST00000480858,ENST00000561430,ENST00000495420,ENST00000495764,ENST00000483221	NM_006305,NM_001003013,NM_001195019,NM_001260818	ANP32A	0.000312291	3	12	2	1.71e-44	TRUE
UNKNOWN	NR_026758	LOC440905	0.000312291	1	8	2	3.13e-06	TRUE
UNKNOWN	NR_026808	ANP32A-IT1	0.000312291	1	1	2	9.83e-05	TRUE
ENST00000531326,ENST00000392597,ENST00000351677,ENST00000530818	NM_204968,NM_002834,NM_001261109,NM_080601	PTPN11	0.000324584	1	8	2	3.19e-05	TRUE
ENST00000239940,ENST00000452853,ENST00000423691,ENST00000481767,ENST00000460404,ENST00000468323,ENST00000494827,ENST00000497060,ENST00000490975,ENST00000497148,ENST00000498169,ENST00000475518,ENST00000481275,ENST00000498307,ENST00000489155,ENST00000461930,ENST00000461868	NM_119080,NM_001079760,NM_001133095,NM_002628,NM_053024,NM_001128197	PFN2	0.000324584	1	3	2	6.21e-07	TRUE
ENST00000370377,ENST00000346693,ENST00000437787,ENST00000355149,ENST00000466436,ENST00000418547,ENST00000491877,ENST00000320893	NM_001131456,NM_134446,NM_001184808,NM_134445,NM_031462,NM_001083758,NM_001242614,NM_001261370	CD99L2	0.000324584	1	8	2	4.03e-05	TRUE
UNKNOWN	NR_037601,NR_037602,NR_037600	LOC100507217	0.000324584	1	4	2	1.22e-17	TRUE
ENST00000557485,ENST00000335263,ENST00000424963,ENST00000322340,ENST00000499851,ENST00000556807,ENST00000342702,ENST00000555879,ENST00000561154,ENST00000558567,ENST00000299135,ENST00000454394,ENST00000556094,ENST00000556511,ENST00000557186,ENST00000545563,ENST00000558854,ENST00000559708,ENST00000558135,ENST00000558448,ENST00000555973,ENST00000559478	NM_144574,NM_181291,NM_181308,NM_001191156,NM_001242414,NM_001242416,NM_001242415,NM_001242417,NM_001242418,NR_038354,NM_001266073	WDR20	0.000324584	1	4	2	0.000138497	TRUE
ENST00000372435,ENST00000372428,ENST00000372419,ENST00000543248,ENST00000372418	NM_001131155,NM_001204402,NM_002764,NM_001046189,NM_001260582	PRPS1	0.000324584	4	1	2	2.13e-24	TRUE
ENST00000403733,ENST00000378925,ENST00000508614,ENST00000448232,ENST00000513834,ENST00000427431,ENST00000438543,ENST00000504005,ENST00000506225,ENST00000515284,ENST00000508747	NM_024949	WWC2	0.000336684	1	19	2	0.000467432	TRUE
UNKNOWN	NR_027253	LOC285696	0.000336684	1	6	2	6.09e-11	TRUE
ENST00000418696,ENST00000429663,ENST00000431757,ENST00000450026,ENST00000436447,ENST00000457926,ENST00000423742,ENST00000437774,ENST00000557444,ENST00000421164,ENST00000388970,ENST00000421780,ENST00000423684,ENST00000458301,ENST00000355531,ENST00000427658,ENST00000454997	NR_003226,NR_003227,NR_003228	AFG3L1P	0.000336684	1	3	2	0.00174589	TRUE
ENST00000373816,ENST00000456852,ENST00000361872,ENST00000294409,ENST00000480454	NM_006582,NM_024482,NM_001046475	GMEB1	0.000336684	1	4	2	0.000164795	TRUE
ENST00000423759,ENST00000449580,ENST00000373790,ENST00000276072,ENST00000483365,ENST00000472567,ENST00000478305,ENST00000474917,ENST00000483985,ENST00000463163,ENST00000373775,ENST00000437147,ENST00000461764,ENST00000468167,ENST00000485087,ENST00000462588,ENST00000492404,ENST00000482544,ENST00000461157,ENST00000467309,ENST00000497222	NM_004606,NM_138923,NM_001181403	TAF1	0.000336684	1	3	2	0.00392956	TRUE
ENST00000253799,ENST00000452774	NM_113476,NM_009590,NM_001158,NM_001206861	AOC2	0.000336684	1	5	2	5.21e-08	TRUE
ENST00000230461,ENST00000370050,ENST00000475111,ENST00000518161	NM_001012879,NM_001131090,NM_001143958,NM_018247,NM_001075223,NM_001260817	TMEM30A	0.000336684	1	3	2	3.11e-10	TRUE
UNKNOWN	NR_037897	FLJ38109	0.000336684	2	8	2	7.71e-05	TRUE
ENST00000265735,ENST00000522045,ENST00000445866,ENST00000437425,ENST00000447873,ENST00000428696,ENST00000472326,ENST00000415788,ENST00000462731,ENST00000450385,ENST00000425444	NM_001132212,NM_003919,NM_001099400,NM_001099401,NM_001144124,NM_001075145	SGCE	0.000336684	2	2	2	1.28e-14	TRUE
ENST00000390975,ENST00000583861	NR_002439	SNORD43	0.000349489	1	1	2	5.95e-17	TRUE
ENST00000395189,ENST00000354613,ENST00000313375,ENST00000345114,ENST00000429400,ENST00000414749,ENST00000434326,ENST00000467221,ENST00000476404,ENST00000453275,ENST00000488212,ENST00000456640	NM_001110841,NM_032951,NM_032953,NM_032952,NM_032954,NM_001205408	MLXIPL	0.000349489	6	8	2	7.22e-06	TRUE
ENST00000255764,ENST00000503112,ENST00000504058	NM_001135513,NM_032286,NM_001034756,NM_140592,NM_001260853	MED10	0.000349489	1	4	2	3.1e-12	TRUE
ENST00000453744,ENST00000394803,ENST00000394801,ENST00000394804,ENST00000343106,ENST00000508474,ENST00000503742,ENST00000321805,ENST00000350435,ENST00000338145,ENST00000349311,ENST00000504211,ENST00000505009,ENST00000357194,ENST00000505207,ENST00000507845,ENST00000502404,ENST00000508635,ENST00000505307,ENST00000510129,ENST00000508476,ENST00000502563,ENST00000508238,ENST00000514755,ENST00000508974…	NM_001031153,NM_181886,NM_181891,NM_181889,NM_181888,NM_003340,NM_181887,NM_181890,NM_181893,NM_181892,NM_001075135,NM_001261204	UBE2D3	0.000349489	1	7	2	2.86e-09	TRUE
ENST00000261900,ENST00000417344,ENST00000551989,ENST00000550457	NM_001009054,NM_001240,NM_001081846,NM_001001147	CCNT1	0.000349489	1	6	2	7.37e-07	TRUE
ENST00000292147,ENST00000594342,ENST00000600651,ENST00000598330,ENST00000602138,ENST00000595115	NM_014297,NM_001034344	ETHE1	0.00036022	1	5	2	0.000529427	TRUE
ENST00000561208,ENST00000338564,ENST00000397624,ENST00000340545,ENST00000444725,ENST00000382766,ENST00000560702,ENST00000314177,ENST00000219869,ENST00000560570,ENST00000559085,ENST00000397620,ENST00000424352,ENST00000559972,ENST00000561264,ENST00000561284,ENST00000559371,ENST00000557992,ENST00000558643,ENST00000559561,ENST00000559408,ENST00000561163,ENST00000561422,ENST00000557796,ENST00000560617…	NM_204803,NM_001133677,NM_002399,NM_170674,NM_170677,NM_172316,NM_170675,NM_170676,NM_172315,NM_001191269,NM_001220482,NR_051953	MEIS2	0.00036022	1	6	2	2.19e-22	TRUE
ENST00000298537,ENST00000357365,ENST00000371725,ENST00000461693,ENST00000481114,ENST00000417512,ENST00000466579,ENST00000486441,ENST00000468963,ENST00000371723,ENST00000446833	NM_006643,NM_001039708,NM_001039707,NM_001046140	SDCCAG3	0.00036022	3	5	2	0.00364444	TRUE
ENST00000489923,ENST00000316218,ENST00000484644,ENST00000495004,ENST00000472319,ENST00000467157,ENST00000485208,ENST00000469649	NR_028444,NM_006810,NM_001046091,NM_001163046	PDIA5	0.00036022	2	11	2	1.7e-05	TRUE
ENST00000488523,ENST00000366844,ENST00000358675,ENST00000366843,ENST00000284563,ENST00000498108,ENST00000483952,ENST00000497899,ENST00000391874	NM_204300,NM_018212,NM_001008493	ENAH	0.00036022	1	8	2	7.53e-20	TRUE
ENST00000561234,ENST00000416165,ENST00000560846,ENST00000561464	NM_001199543,NM_014952,NM_001206282,NM_001257462	BAHD1	0.00036022	1	2	2	6.41e-05	TRUE
ENST00000475792,ENST00000361317,ENST00000343484,ENST00000395053,ENST00000487164,ENST00000476113,ENST00000339217,ENST00000415602,ENST00000440819,ENST00000470559,ENST00000465111,ENST00000458442,ENST00000465433,ENST00000477783,ENST00000495168,ENST00000461072,ENST00000475236	NM_003195,NM_198723,NM_001075329,NM_001257499	TCEA2	0.00036022	1	5	2	1.97e-06	TRUE
ENST00000475243,ENST00000395802,ENST00000520497,ENST00000265619,ENST00000463370,ENST00000476395	NM_001006296,NM_004738,NM_001195677,NR_036633,NM_001123213,NM_001082423,NM_001257488	VAPB	0.00036022	2	12	2	1.48e-06	TRUE
ENST00000589627,ENST00000245932,ENST00000592139,ENST00000590603,ENST00000586014,ENST00000586619,ENST00000588482,ENST00000590459,ENST00000588463,ENST00000588273,ENST00000587444	NM_003370,NM_001003256,NM_001038110	VASP	0.00036022	1	4	2	0.00738701	TRUE
ENST00000220507	NM_133639,NM_001076099,NM_001163596,NM_001244417	RHOV	0.00036022	2	4	2	2.29e-38	TRUE
ENST00000505286,ENST00000306200,ENST00000503692,ENST00000515687,ENST00000503861,ENST00000502267,ENST00000510296,ENST00000512195,ENST00000507908,ENST00000512780	NM_016930,NM_001099719,NM_001131413,NM_001252158,NM_001260531	STX18	0.00036022	1	12	2	0.00173605	TRUE
ENST00000263269	NM_000836	GRIN2D	0.000364966	1	5	2	2.95e-06	TRUE
ENST00000248450,ENST00000444053,ENST00000475678,ENST00000420660,ENST00000494720,ENST00000489767,ENST00000422731,ENST00000465442,ENST00000447885,ENST00000461911	NM_001079747,NM_001171059,NM_001131816,NM_001087,NM_001013850,NM_001076995,NM_001246564	AAMP	0.000364966	1	2	2	1.64e-08	TRUE
ENST00000539803,ENST00000545280,ENST00000266542,ENST00000504702,ENST00000544702,ENST00000534950,ENST00000543933,ENST00000537833,ENST00000534969,ENST00000545337,ENST00000543941,ENST00000539927	NM_016546,NM_001192155	C1RL	0.000364966	2	6	2	9.64e-20	TRUE
ENST00000274606,ENST00000314397,ENST00000502263,ENST00000514354,ENST00000511078,ENST00000510363	NM_001131876,NM_017838,NM_001034833,NM_001015626,NM_001180268,NM_143708,NM_001252144,NM_001267011	NHP2	0.000364966	1	1	2	0.0030546	TRUE
ENST00000517970,ENST00000523863,ENST00000349423,ENST00000341922,ENST00000265428,ENST00000518683,ENST00000520374,ENST00000521079,ENST00000520453,ENST00000521997,ENST00000524036,ENST00000520521,ENST00000520798	NM_001012554,NM_007013,NM_001037463,NM_001260797	WWP1	0.000364966	1	4	2	1.21e-13	TRUE
ENST00000510267,ENST00000315423,ENST00000503235,ENST00000502256,ENST00000505186,ENST00000507686,ENST00000511352	NM_001031166,NM_024309,NM_001161527,NM_001244591	TNIP2	0.000364966	1	1	2	8.84e-05	TRUE
ENST00000506502,ENST00000265271,ENST00000508019	NM_018989,NM_001193172,NM_001261062	RBM27	0.000364966	1	6	2	1.79e-05	TRUE
ENST00000256474,ENST00000345392,ENST00000477538	NM_001132918,NM_000551,NM_198156,NM_001008552,NM_001110019	VHL	0.000364966	1	1	2	3.29e-08	TRUE
ENST00000366697,ENST00000295033,ENST00000366698,ENST00000456946,ENST00000479800,ENST00000355586,ENST00000457345,ENST00000520264	NM_016102,NM_001134855,NM_001024940,NM_001105011	TRIM17	0.000364966	3	3	2	6.75e-14	TRUE
ENST00000358183,ENST00000381311,ENST00000572543,ENST00000361571,ENST00000414043,ENST00000574951,ENST00000348066,ENST00000572192,ENST00000574442,ENST00000576872,ENST00000572326,ENST00000575192,ENST00000575365,ENST00000573004,ENST00000574606,ENST00000571831,ENST00000575580	NM_001171168,NM_001171166,NM_001171167,NM_015099,NM_001255972	CAMTA2	0.000364966	4	9	2	3.98e-12	TRUE
ENST00000534025,ENST00000309134,ENST00000525069,ENST00000528117,ENST00000530136	NM_001132297,NM_020644,NM_001034507	TMEM9B	0.000364966	2	1	2	6.26e-31	TRUE
ENST00000436842,ENST00000315212,ENST00000464986,ENST00000454734	NM_204998,NM_002936,NM_001046505,NM_001243681,NM_001257858	RNASEH1	0.000364966	2	2	2	5.14e-26	TRUE
ENST00000497759,ENST00000414441,ENST00000479201,ENST00000310512	NM_001134115,NM_019606,NM_001194991,NM_001194992,NM_001194990,NM_001080283,NM_001261658	MEPCE	0.000364966	2	4	2	2.08e-21	TRUE
ENST00000330263,ENST00000493700,ENST00000479559	NM_016183,NM_001083399,NM_001243715,NM_001266423	MRTO4	0.000364966	2	3	2	7.7e-05	TRUE
UNKNOWN	NR_002809	LOC338799	0.000364966	1	4	2	1.52e-09	TRUE
ENST00000323981,ENST00000526015,ENST00000534079,ENST00000546088,ENST00000393259,ENST00000530769,ENST00000525928,ENST00000529435,ENST00000529900,ENST00000540232,ENST00000527169,ENST00000530089,ENST00000533794,ENST00000529794,ENST00000527068,ENST00000448108,ENST00000528734,ENST00000534770,ENST00000532235,ENST00000532455,ENST00000529508,ENST00000527690	NM_001135511,NM_024116,NM_001037586,NM_001257644	TAF1D	0.000364966	4	3	2	2.71e-14	TRUE
ENST00000602662,ENST00000602293,ENST00000602384,ENST00000602450,ENST00000428975,ENST00000289749,ENST00000451758,ENST00000439664,ENST00000375136,ENST00000548815,ENST00000425400,ENST00000439278,ENST00000427894	NM_204149,NM_005380,NM_001204084,NM_001204086,NM_182744,NM_001204085,NM_001164945,NM_001184671	NBL1	0.000372211	1	2	2	8.28e-18	TRUE
ENST00000240922,ENST00000477813,ENST00000497525,ENST00000497255,ENST00000493454,ENST00000481432,ENST00000493900,ENST00000478020,ENST00000467022	NM_001030778,NM_001131258,NM_025146,NM_001075750,NM_001244807,NM_001261371	NAA50	0.000372211	1	4	2	0.000720669	TRUE
ENST00000393196,ENST00000487481,ENST00000336097,ENST00000480143,ENST00000512768,ENST00000511355,ENST00000475573,ENST00000013034,ENST00000456492,ENST00000465188	NM_001204752,NM_001131882,NM_000269,NM_198175,NM_001204742,NM_205818,NM_205777,NM_001204749,NM_001204511,NM_001204512,NM_001204515,NM_001204523,NM_001204759,NM_001024637,NM_001204761,NM_001204763,NM_001204876	NME1	0.000372211	1	3	2	9.28e-05	TRUE
ENST00000326648,ENST00000558680,ENST00000559364	NM_015042,NM_001193023,NM_001258136	ZNF609	0.000372211	1	12	2	7.2e-14	TRUE
ENST00000436367,ENST00000244769,ENST00000483591,ENST00000473388,ENST00000495178,ENST00000483954,ENST00000467008,ENST00000344707,ENST00000296858,ENST00000498374,ENST00000492857,ENST00000479680	NM_000332,NM_001128164	ATXN1	0.000372211	3	13	2	0.000106565	TRUE
UNKNOWN	NR_027034	LOC150381	0.000372211	1	6	2	1.93e-08	TRUE
ENST00000395086,ENST00000354624,ENST00000488706,ENST00000470920	NM_025130,NM_001191484	HKDC1	0.000372211	1	7	2	6e-10	TRUE
ENST00000409911,ENST00000409884,ENST00000409093,ENST00000409088,ENST00000409282,ENST00000456154,ENST00000491242	NM_001132970,NM_024993,NM_001134745	LRRTM4	0.000372211	1	8	2	0.00736037	TRUE
UNKNOWN	NM_001204088,NM_001204089	C1orf151-NBL1	0.000372211	1	7	2	1.54e-24	TRUE
ENST00000592666,ENST00000591733,ENST00000262952,ENST00000587870,ENST00000587187,ENST00000591699,ENST00000543616,ENST00000592200,ENST00000398240	NM_013282,NM_001048201,NM_001103098,NM_001242456	UHRF1	0.000372211	2	11	2	0.00142244	TRUE
ENST00000584307,ENST00000577961,ENST00000314574,ENST00000577611,ENST00000581960	NM_205301,NM_001133736,NM_005433,NM_001003239,NM_001101060,NM_001257512	YES1	0.000372211	2	4	2	0.0040493	TRUE
ENST00000416904,ENST00000552593,ENST00000549739,ENST00000551514	NM_001004304,NM_001103252,NM_001266894	ZNF740	0.000372211	4	5	2	2.38e-13	TRUE
ENST00000525907,ENST00000529925,ENST00000423745,ENST00000307823,ENST00000531958,ENST00000531040,ENST00000445895,ENST00000531388,ENST00000524740	NM_001172593,NM_020811,NM_001166222	CARNS1	0.000372211	1	3	2	5.27e-05	TRUE
ENST00000360578	NM_007030,NM_001123206,NM_173976,NM_001266695	TPPP	0.000372211	5	13	2	0.000299978	TRUE
ENST00000584672,ENST00000398519,ENST00000314028,ENST00000581241,ENST00000584377,ENST00000392334,ENST00000577578,ENST00000578501,ENST00000581737,ENST00000580784,ENST00000269361,ENST00000584913,ENST00000403276,ENST00000580565,ENST00000581108,ENST00000582844,ENST00000578904,ENST00000580446,ENST00000581660,ENST00000578194,ENST00000579316,ENST00000584472,ENST00000580061,ENST00000585026,ENST00000579308…	NM_001131871,NM_139062,NM_001893,NM_001102080	CSNK1D	0.000386568	1	6	2	0.00495585	TRUE
ENST00000295470,ENST00000349655,ENST00000502762,ENST00000602300,ENST00000507721,ENST00000514511	NM_001031142,NM_031372,NR_003249,NM_001083725,NM_001207000,NM_001260709	HNRPDL	0.000386568	1	4	2	3.47e-14	TRUE
ENST00000361570,ENST00000579755,ENST00000304494,ENST00000579122,ENST00000578845,ENST00000530628,ENST00000498124,ENST00000498628,ENST00000380151,ENST00000494262,ENST00000446177,ENST00000479692,ENST00000577854,ENST00000380150,ENST00000497750,ENST00000470819,ENST00000582361	NM_204434,NM_001146290,NM_058195,NM_058197,NM_000077,NM_001195132,NM_001032973,NM_001034076	CDKN2A	0.000386568	3	9	2	8.35e-08	TRUE
ENST00000548075,ENST00000328827,ENST00000550603,ENST00000549050,ENST00000547699,ENST00000551712,ENST00000550006,ENST00000547571,ENST00000547016,ENST00000548426,ENST00000552637	NM_002583	PAWR	0.000386568	2	7	2	0.000850194	TRUE
ENST00000581135,ENST00000578681,ENST00000583590,ENST00000359353,ENST00000389924,ENST00000580108,ENST00000578137,ENST00000457800,ENST00000584261,ENST00000577940,ENST00000579511,ENST00000577978,ENST00000584010,ENST00000581477,ENST00000578593,ENST00000584951,ENST00000579539,ENST00000582985,ENST00000581767	NM_001030926,NM_001132896,NM_007372,NM_203499,NM_001261555	DDX42	0.000386568	1	3	2	6.4e-16	TRUE
ENST00000372980,ENST00000342272	NM_175913,NM_020433,NM_001081998	JPH2	0.000386568	1	8	2	4.71e-09	TRUE
ENST00000262352,ENST00000490167,ENST00000422398	NM_004170,NM_001003139,NM_001164649,NM_174599,NM_001082249,NM_001265831	SLC1A1	0.000386568	1	7	2	0.00114704	TRUE
ENST00000253861,ENST00000486013,ENST00000393161,ENST00000462055,ENST00000481074,ENST00000492326,ENST00000539845,ENST00000480840,ENST00000486409,ENST00000479839,ENST00000494685,ENST00000498024,ENST00000483800,ENST00000545148,ENST00000469115,ENST00000489931,ENST00000482089,ENST00000460346,ENST00000463150,ENST00000472020,ENST00000478265,ENST00000541309,ENST00000484397,ENST00000480337,ENST00000459626…	NM_001199320,NM_001131551,NM_021807,NM_001037126,NM_001102207	EXOC4	0.000386568	4	27	2	3.71e-07	TRUE
ENST00000539068,ENST00000536438,ENST00000357266,ENST00000540787,ENST00000542713	NM_001005431,NM_001131217,NM_001145775,NM_004117,NM_001145776,NM_001145777,NM_001192862	FKBP5	0.000386568	2	9	2	1.28e-12	TRUE
ENST00000454935	NR_026762	LINC00263	0.000401249	1	3	2	1.82e-14	TRUE
ENST00000340124,ENST00000562132,ENST00000440783,ENST00000562801,ENST00000569193	NM_104862,NM_001142466,NM_133443,NM_001193187,NM_001179857	GPT2	0.000401715	1	9	2	0.00282073	TRUE
ENST00000570156,ENST00000284548,ENST00000366709,ENST00000366707,ENST00000422127,ENST00000493977,ENST00000359599,ENST00000366706,ENST00000366704,ENST00000483539,ENST00000494839,ENST00000602685,ENST00000602832,ENST00000441106,ENST00000474237	NM_052843,NM_001098623,NM_001102196,NM_001271223	OBSCN	0.000401715	1	23	2	0.00117625	TRUE
ENST00000503906,ENST00000355238,ENST00000369622,ENST00000444272	NM_001031083,NM_001193845,NM_001159673,NM_001159674,NM_001159675,NM_001159676,NM_001159677,NM_006372,NM_001253771	SYNCRIP	0.000401715	4	4	2	2.87e-36	TRUE
ENST00000309295,ENST00000533237,ENST00000531106,ENST00000526990,ENST00000533465,ENST00000529099,ENST00000529596,ENST00000533364,ENST00000527214,ENST00000529056	NM_001099409,NM_001191243	EHBP1L1	0.000401715	1	10	2	8.91e-31	TRUE
ENST00000414371,ENST00000495147,ENST00000370784,ENST00000370785,ENST00000482240,ENST00000475361,ENST00000445123,ENST00000494709,ENST00000470657,ENST00000460216,ENST00000463842	NM_138819,NM_001170779,NM_001170780,NM_001170781,NM_001170782,NM_001170783,NM_001170784	FAM122C	0.000401715	1	3	2	0.00107617	TRUE
ENST00000571088,ENST00000399759,ENST00000174621,ENST00000399756,ENST00000574085,ENST00000425167,ENST00000576351,ENST00000310522,ENST00000570742	NM_204572,NM_080704,NM_018727,NM_080705,NM_080706,NM_001003970,NM_001082166	TRPV1	0.000401715	1	7	2	0.00627404	TRUE
ENST00000358409,ENST00000540314,ENST00000536826,ENST00000359864,ENST00000543035,ENST00000397122,ENST00000443986,ENST00000544666	NM_001001338,NM_001001341,NM_001001339,NM_001001337,NM_001001340,NM_204771,NM_003213,NM_201441,NM_201443,NM_001142666	TEAD4	0.000401715	3	9	2	1.29e-07	TRUE
ENST00000471236,ENST00000383657,ENST00000493515,ENST00000480081,ENST00000469317	NM_001012920,NM_001132017,NM_198402,NM_001130757,NM_001261129	PTPLB	0.000401715	1	9	2	2.13e-07	TRUE
ENST00000312932,ENST00000428195,ENST00000403484,ENST00000467218,ENST00000452649,ENST00000437022,ENST00000416523,ENST00000405717,ENST00000402592,ENST00000459728,ENST00000429917,ENST00000415072,ENST00000464335,ENST00000484486,ENST00000485482,ENST00000483116,ENST00000478762	NM_001131359,NM_012429,NM_033382,NM_001204204,NM_001198918,NM_177943	SEC14L2	0.000401715	1	3	2	1.67e-11	TRUE
ENST00000267512,ENST00000533601,ENST00000436278,ENST00000585059,ENST00000426039,ENST00000554593,ENST00000555256	NM_198686,NM_001046538	RAB15	0.000401715	1	1	2	0.00343735	TRUE
ENST00000426335,ENST00000524782,ENST00000395449,ENST00000319543,ENST00000533243,ENST00000419701,ENST00000527776,ENST00000526342,ENST00000527927,ENST00000532478,ENST00000525635,ENST00000532438,ENST00000529455,ENST00000525398,ENST00000526948,ENST00000531750,ENST00000525314,ENST00000527097,ENST00000528444,ENST00000524727,ENST00000529599,ENST00000528041,ENST00000529439,ENST00000530596,ENST00000533939…	NM_001033871,NM_001132185,NM_032389,NM_001080227,NM_001242832,NM_001244552	ARFGAP2	0.000401715	1	2	2	0.00147921	TRUE
ENST00000343815,ENST00000428931,ENST00000441890,ENST00000271877,ENST00000412596,ENST00000368504,ENST00000437652,ENST00000456325,ENST00000361546,ENST00000466173,ENST00000495676,ENST00000489076,ENST00000433615,ENST00000428595,ENST00000465855,ENST00000484696,ENST00000475373,ENST00000493867,ENST00000484819	NM_001127320,NM_014847,NM_001103107	UBAP2L	0.000401715	1	7	2	0.0098698	TRUE
ENST00000422611,ENST00000338335,ENST00000316341,ENST00000572037,ENST00000541864,ENST00000576616,ENST00000570802,ENST00000537830,ENST00000570616,ENST00000575857,ENST00000573023,ENST00000576513,ENST00000572476,ENST00000574665,ENST00000572766,ENST00000573702,ENST00000576377,ENST00000571299,ENST00000572010,ENST00000576462	NM_001145961,NM_001145964,NM_001145962,NM_005072,NM_001145963,NM_001010952,NM_213949,NM_001174091	SLC12A4	0.000401715	2	10	2	0.00232376	TRUE
ENST00000392272,ENST00000368173,ENST00000360089,ENST00000359209,ENST00000416935,ENST00000368172	NM_018240	KIRREL	0.000401715	1	23	2	1.34e-07	TRUE
ENST00000522664,ENST00000354546,ENST00000356496,ENST00000377751,ENST00000523714,ENST00000521512,ENST00000517486,ENST00000519644,ENST00000520054,ENST00000517707,ENST00000517677,ENST00000521749,ENST00000517757,ENST00000520378,ENST00000523164,ENST00000519610	NM_204730,NM_001131761,NM_001155,NM_001193544,NM_001103224	ANXA6	0.000401715	1	17	2	3.13e-08	TRUE
ENST00000393946,ENST00000525457,ENST00000527043,ENST00000526281,ENST00000531392,ENST00000533427,ENST00000525149	NM_001199512,NM_001132775,NM_001177880,NM_177963,NM_001192890	SYT12	0.000401715	2	17	2	5.45e-12	TRUE
ENST00000393085,ENST00000435723	NM_204886,NM_145808,NM_001002989,NM_203362,NM_001256778,NM_001260744	MTPN	0.000416859	1	2	2	1.13e-12	TRUE
ENST00000321919,ENST00000436648,ENST00000588732,ENST00000589389,ENST00000381983,ENST00000587936,ENST00000591451,ENST00000591846,ENST00000588297,ENST00000586095,ENST00000587297,ENST00000586901,ENST00000587875,ENST00000591159	NM_001006572,NM_001134047,NM_032569,NM_001040568,NM_113449,NM_001035688	GLYR1	0.000416859	1	6	2	1.29e-09	TRUE
UNKNOWN	NR_029192	LOC100133315	0.000416859	1	12	2	0.0015996	TRUE
ENST00000357430,ENST00000392066,ENST00000535678,ENST00000413316,ENST00000542810,ENST00000540115,ENST00000463813,ENST00000421680,ENST00000407441,ENST00000474422,ENST00000495541	NM_001134109,NM_004457,NM_203372,NM_001143698,NM_001205468	ACSL3	0.000416859	4	9	2	4.49e-09	TRUE
ENST00000432190,ENST00000222644,ENST00000409761,ENST00000396475,ENST00000430180,ENST00000426450,ENST00000472674,ENST00000464384	NM_016447,NM_001183201,NM_001246656,NM_001260678	MPP6	0.000416859	2	4	2	2.32e-26	TRUE
ENST00000589735	NM_001128619	LUZP6	0.000416859	1	2	2	1.14e-12	TRUE
ENST00000296484,ENST00000394970,ENST00000474012	NM_001161581,NM_015426,NM_001161580,NM_001038560	POC1A	0.000430326	1	7	2	0.00151354	TRUE
ENST00000215829,ENST00000468770,ENST00000402849,ENST00000404603,ENST00000439775	NM_001007838,NM_001194052,NM_004175,NM_001076479,NM_001243426	SNRPD3	0.000430326	1	1	2	1.27e-08	TRUE
ENST00000446423	NR_040047,NR_040048,NR_040049	SDCBP2-AS1	0.000430326	1	6	2	1.54e-06	TRUE
ENST00000397049,ENST00000356714,ENST00000397046,ENST00000397048,ENST00000454650,ENST00000339737,ENST00000343985,ENST00000471348,ENST00000487426	NM_001006160,NM_198948,NM_198950,NM_198953,NM_198949,NM_198954,NM_002452,NM_198952,NM_001244568,NM_001261225	NUDT1	0.000430326	1	3	2	4.67e-14	TRUE
ENST00000256951,ENST00000431267,ENST00000542289,ENST00000544053,ENST00000542474,ENST00000538364,ENST00000396301,ENST00000541935,ENST00000535134,ENST00000537612,ENST00000536383,ENST00000546357	NM_001133806,NM_001423,NM_001099940,NM_001082357	EMP1	0.000430326	1	2	2	2.6e-32	TRUE
ENST00000274137,ENST00000469176,ENST00000510329	NM_001194314,NM_001130134,NM_004553,NM_175810	NDUFS6	0.000430326	1	4	2	2.3e-10	TRUE
ENST00000379887,ENST00000570085,ENST00000564062,ENST00000567762,ENST00000561987,ENST00000565950,ENST00000561770,ENST00000566063,ENST00000562891,ENST00000563310	NM_001030387,NM_005744,NM_001081714,NM_001244645	ARIH1	0.000430326	1	5	2	0.000113412	TRUE
ENST00000469372,ENST00000497706,ENST00000452323,ENST00000452202,ENST00000411571,ENST00000413154,ENST00000484636,ENST00000299367,ENST00000442278,ENST00000447952,ENST00000418949,ENST00000482060,ENST00000383177,ENST00000494905,ENST00000485690,ENST00000486124,ENST00000468407,ENST00000498138,ENST00000418584,ENST00000431247,ENST00000488666,ENST00000458410,ENST00000462325,ENST00000550363,ENST00000551081…	NM_001132609,NM_001178063,NM_001145903,NM_000063,NM_001101815,NM_001034492,NM_013484,NM_172222,NR_073063	C2	0.000430326	1	1	2	9.41e-18	TRUE
ENST00000263238,ENST00000443297,ENST00000415792,ENST00000446821,ENST00000536059,ENST00000535589,ENST00000489779,ENST00000484165,ENST00000478928	NM_204307,NM_001132599,NM_005721,NM_001134343,NM_174226	ACTR3	0.00044405	2	3	2	6.76e-14	TRUE
ENST00000360803,ENST00000538293,ENST00000491635,ENST00000360059,ENST00000545048,ENST00000491261,ENST00000483839	NM_001006354,NM_012341,NM_001192601,NM_001253779	GTPBP4	0.00044405	1	3	2	1.06e-18	TRUE
ENST00000347967,ENST00000535772,ENST00000340799,ENST00000351559,ENST00000262410,ENST00000344290,ENST00000571311,ENST00000570299,ENST00000334239,ENST00000446361,ENST00000431008,ENST00000574436,ENST00000571987,ENST00000415613,ENST00000420682,ENST00000576518,ENST00000572440,ENST00000576238,ENST00000577017	NM_001199193,NM_001009068,NM_001203251,NM_001203252,NM_001123067,NM_001123066,NM_016841,NM_016835,NM_005910,NM_016834,NM_001110801,NM_174106	MAPT	0.00044405	1	11	2	0.00517698	TRUE
ENST00000269701,ENST00000598597,ENST00000537303,ENST00000599883,ENST00000594314,ENST00000595416	NM_005858,NM_001007123,NM_001102072	AKAP8	0.00044405	1	10	2	0.00385922	TRUE
ENST00000425441,ENST00000546280,ENST00000292314,ENST00000488069,ENST00000446836,ENST00000494655,ENST00000460035,ENST00000492819	NM_001006353,NM_144716,NM_001076466	CCDC12	0.00044405	1	7	2	8.1e-12	TRUE
ENST00000462520,ENST00000368917,ENST00000368918,ENST00000489549,ENST00000486076,ENST00000368916,ENST00000467551	NM_144618,NM_001076242,NM_001246456	GABPB2	0.00044405	1	3	2	4.41e-10	TRUE
ENST00000308508	NM_001897,NM_001192782	CSPG4	0.00044405	2	4	2	0.00180614	TRUE
ENST00000217130,ENST00000450537,ENST00000369888	NM_020713,NM_001270577	ZNF512B	0.00044405	1	4	2	2.35e-06	TRUE
ENST00000455895,ENST00000413080,ENST00000444377,ENST00000341071,ENST00000526031,ENST00000419121,ENST00000446293,ENST00000463967,ENST00000373520,ENST00000449308,ENST00000527513,ENST00000527163,ENST00000530485,ENST00000474414,ENST00000530876,ENST00000530753,ENST00000533084,ENST00000531222	NM_001012842,NM_001143889,NM_018045,NM_001143890,NM_001143888,NM_001035026,NM_001243957,NM_001253722	BSDC1	0.00044405	1	3	2	0.0019897	TRUE
UNKNOWN	NM_001204299	ZNF664-FAM101A	0.000460136	3	7	2	1.44e-14	TRUE
ENST00000370610,ENST00000370613,ENST00000357540,ENST00000337540,ENST00000393677,ENST00000453958,ENST00000359980,ENST00000462887,ENST00000356257,ENST00000423811,ENST00000481956,ENST00000477521,ENST00000473237	NM_001039304,NM_001132850,NM_001174119,NM_001174120,NM_001174121,NM_001174122,NM_001002261,NM_144588,NM_001002262,NM_001017939	ZFYVE27	0.000460136	1	4	2	0.00763162	TRUE
ENST00000357869,ENST00000547260,ENST00000550422,ENST00000307885,ENST00000552099,ENST00000548351,ENST00000552090,ENST00000551435,ENST00000548820	NM_020983,NM_015270,NM_001195147,NM_001143877	ADCY6	0.000460136	6	13	2	4.03e-09	TRUE
ENST00000574306,ENST00000334146,ENST00000576749,ENST00000570416,ENST00000571595,ENST00000571091,ENST00000573127,ENST00000576489,ENST00000575626,ENST00000573075,ENST00000574016,ENST00000577164	NR_028502,NR_028503,NR_028504,NR_028505	MIR22HG	0.000460136	2	6	2	1.76e-06	TRUE
ENST00000589876,ENST00000245925,ENST00000586195,ENST00000588308,ENST00000536630,ENST00000587152,ENST00000592433,ENST00000586405,ENST00000587484,ENST00000592482,ENST00000590819,ENST00000399594,ENST00000590575,ENST00000588272,ENST00000588000,ENST00000588610,ENST00000588496,ENST00000586902,ENST00000590580,ENST00000592853,ENST00000586770,ENST00000587804,ENST00000588889,ENST00000591721,ENST00000593255…	NR_034098,NM_012155,NM_001193268,NM_001193269	EML2	0.000460136	6	8	2	8.61e-20	TRUE
ENST00000412615,ENST00000550051,ENST00000257604,ENST00000549358,ENST00000547063,ENST00000548092,ENST00000552890,ENST00000552896,ENST00000548277	NM_001006191,NM_001143906,NM_006700,NM_001014908,NM_001266507	TRAFD1	0.000460136	1	4	2	6.67e-05	TRUE
ENST00000537532,ENST00000539644,ENST00000392404,ENST00000538932,ENST00000541448,ENST00000540009,ENST00000542820,ENST00000542493,ENST00000543017,ENST00000539257,ENST00000337815,ENST00000546098,ENST00000539501,ENST00000540498	NM_001194125,NM_001132221,NM_001204298,NM_152437	ZNF664	0.000460136	3	5	2	5.09e-24	TRUE
ENST00000538392,ENST00000542222,ENST00000545581,ENST00000544681,ENST00000537087,ENST00000229281,ENST00000540506	NM_138425	C12orf57	0.000460136	1	2	2	1.78e-11	TRUE
ENST00000393238,ENST00000432054,ENST00000426664,ENST00000329333,ENST00000510323,ENST00000505616,ENST00000505924,ENST00000513411,ENST00000512902,ENST00000508869,ENST00000503256,ENST00000515024,ENST00000508729,ENST00000509440,ENST00000510521	NR_033361,NM_001017395,NM_001128224,NM_001101925,NM_001258443,NM_001261150	TMCC1	0.000460136	1	8	2	2.17e-06	TRUE
ENST00000588522,ENST00000291270,ENST00000600757,ENST00000596686,ENST00000343373,ENST00000447742,ENST00000458663,ENST00000598272,ENST00000354227,ENST00000544740,ENST00000593574,ENST00000597660,ENST00000600370,ENST00000595361,ENST00000599002,ENST00000598191,ENST00000596920,ENST00000598180,ENST00000596067,ENST00000599392	NM_004409,NM_001081562,NM_001081560,NM_001081563,NM_001260568	DMPK	0.000460136	1	5	2	8.41e-11	TRUE
ENST00000342907,ENST00000393640,ENST00000567822,ENST00000566097,ENST00000561708,ENST00000567586	NM_204480,NM_001037307,NM_006927,NM_001002892,NM_001266341	ST3GAL2	0.000460136	1	10	2	2.6e-05	TRUE
ENST00000441561,ENST00000262177,ENST00000429029,ENST00000486083,ENST00000417758,ENST00000452797,ENST00000459889,ENST00000443280,ENST00000488001,ENST00000441291,ENST00000437030,ENST00000412557,ENST00000453383,ENST00000439402,ENST00000468928,ENST00000465908,ENST00000487480,ENST00000486247,ENST00000494267	NM_001012556,NM_001134012,NM_058246,NM_005494,NM_174532,NM_001257911	DNAJB6	0.000460136	1	16	2	4.12e-05	TRUE
ENST00000532317,ENST00000526033,ENST00000530692,ENST00000526548,ENST00000393346,ENST00000529760,ENST00000528398,ENST00000532603,ENST00000356360,ENST00000529016,ENST00000526961,ENST00000526907,ENST00000530542,ENST00000534375,ENST00000534412,ENST00000533350,ENST00000531771,ENST00000531558,ENST00000531930,ENST00000532041,ENST00000525162,ENST00000528256,ENST00000528411	NM_007166,NM_001008660,NM_001101977,NM_001206946,NM_001206947,NM_001246270,NM_001266499	PICALM	0.000460136	1	6	2	1.56e-24	TRUE
ENST00000339209,ENST00000366780,ENST00000480008,ENST00000464779	NM_018288,NM_133325,NM_001038052	PHF10	0.000460136	1	5	2	2.01e-12	TRUE
ENST00000248098,ENST00000569256,ENST00000567717,ENST00000562684,ENST00000561516,ENST00000382711,ENST00000566742,ENST00000569765,ENST00000566925,ENST00000382710,ENST00000566691,ENST00000565851,ENST00000568376,ENST00000562569	NM_001030651,NM_144570,NM_001048070,NM_001081546,NM_001260714	HN1L	0.000467895	2	4	2	4.53e-11	TRUE
ENST00000309481,ENST00000394175,ENST00000360317,ENST00000479136,ENST00000477054,ENST00000394179,ENST00000418519,ENST00000520542,ENST00000524039,ENST00000522564,ENST00000523371,ENST00000486560,ENST00000468820,ENST00000519429,ENST00000464556	NM_018530,NM_001165958,NM_001042471,NM_001165959,NM_001244217	GSDMB	0.00047461	3	4	2	1.15e-21	TRUE
ENST00000537545,ENST00000357103,ENST00000540974,ENST00000543456,ENST00000535774,ENST00000544470,ENST00000537190	NM_001007854,NM_024551,NM_001163830,NM_001007192,NM_001040499,NM_001266618	ADIPOR2	0.00047461	1	4	2	2.07e-09	TRUE
ENST00000007699,ENST00000571485,ENST00000571834,ENST00000571464,ENST00000570720,ENST00000570627,ENST00000571127	NM_015982,NM_001098126	YBX2	0.00047461	1	8	2	7.7e-08	TRUE
ENST00000297071,ENST00000392502,ENST00000497730,ENST00000475970,ENST00000482395,ENST00000538367,ENST00000486934,ENST00000494255,ENST00000474586,ENST00000490942,ENST00000448549	NM_001006360,NM_001168888,NM_013293,NM_001077223,NM_001046380,NM_001130937,NM_001258113	TRA2A	0.00047461	1	4	2	2.18e-28	TRUE
ENST00000565560,ENST00000563439,ENST00000432069,ENST00000568086,ENST00000564992,ENST00000564053,ENST00000565645,ENST00000568199,ENST00000566871,ENST00000568503,ENST00000268605,ENST00000563258,ENST00000568146,ENST00000564860	NM_001185058,NM_001185057,NM_003946,NM_001083688	NOL3	0.00047461	1	2	2	6.25e-24	TRUE
ENST00000272091,ENST00000366817	NM_152608,NM_001099065	SDE2	0.00047461	1	1	2	1.99e-10	TRUE
ENST00000366711,ENST00000484749,ENST00000546123	NM_001030958,NM_001181780,NM_001010867,NM_001205580,NM_001244830	IBA57	0.00047461	2	1	2	1.15e-17	TRUE
ENST00000384994	NR_032646,NR_035941,NR_030343	MIR612	0.00047461	2	1	2	1.31e-06	TRUE
ENST00000555834,ENST00000555647,ENST00000555009,ENST00000555910,ENST00000354625,ENST00000553646,ENST00000556848,ENST00000553315,ENST00000553971,ENST00000553789,ENST00000358328,ENST00000557413,ENST00000554834,ENST00000553894,ENST00000554900,ENST00000557383,ENST00000556776	NM_001132323,NM_031464,NM_001037472	RPS6KL1	0.00047461	1	2	2	6.2e-10	TRUE
ENST00000294576,ENST00000448924,ENST00000379339,ENST00000421241,ENST00000379325,ENST00000465822,ENST00000467751,ENST00000477196,ENST00000487177,ENST00000464905,ENST00000379320,ENST00000379319,ENST00000434641,ENST00000482816,ENST00000437760,ENST00000462097,ENST00000473600,ENST00000475119,ENST00000442117,ENST00000427787,ENST00000472741,ENST00000480643	NM_001133430,NM_017891	C1orf159	0.00047461	2	9	2	4.79e-06	TRUE
ENST00000474221,ENST00000409548,ENST00000409655,ENST00000529087,ENST00000409479,ENST00000482937,ENST00000476372,ENST00000397660	NM_025092	ATHL1	0.00047461	1	6	2	9.18e-08	TRUE
ENST00000221980,ENST00000588912,ENST00000586004,ENST00000587398,ENST00000586480	NM_003259,NM_001113762,NM_001171150	ICAM5	0.00047461	1	4	2	1.77e-08	TRUE
ENST00000397397,ENST00000397411,ENST00000397396,ENST00000397408,ENST00000530404,ENST00000525334,ENST00000397406,ENST00000409543,ENST00000525201,ENST00000397404,ENST00000526055,ENST00000524895,ENST00000532375,ENST00000346501,ENST00000464987,ENST00000409531,ENST00000527644,ENST00000468468,ENST00000529566,ENST00000494815	NM_001025239,NM_001025234,NM_001025236,NM_001025238,NM_001025237,NM_003271,NM_001025235,NM_001101852,NM_001132211	TSPAN4	0.00047461	2	5	2	0.000131611	TRUE
ENST00000229340,ENST00000432953,ENST00000544304,ENST00000534951,ENST00000538903,ENST00000543364,ENST00000540803	NM_001030669,NM_001194766,NM_001167606,NM_006861,NM_001098127,NM_001243291	RAB35	0.00047461	1	3	2	1.02e-14	TRUE
ENST00000366607,ENST00000467767,ENST00000473132	NM_001133939,NM_014765,NM_001099183,NM_001261051	TOMM20	0.00047461	2	3	2	3.15e-18	TRUE
ENST00000532631,ENST00000451872,ENST00000367342,ENST00000413687,ENST00000531649,ENST00000526172,ENST00000465162	NM_018265,NM_001142569	C1orf106	0.000476244	1	3	2	1.68e-07	TRUE
ENST00000391945,ENST00000391942,ENST00000588652,ENST00000391944,ENST00000391941,ENST00000587376,ENST00000485403,ENST00000391940,ENST00000221481,ENST00000586131,ENST00000591309,ENST00000586737,ENST00000586441,ENST00000586856	NM_000400,NM_001130867,NM_001103317,NM_001246590	ERCC2	0.000476244	2	8	2	9.53e-05	TRUE
ENST00000296847	NM_152554	C6orf195	0.000476244	1	4	2	6.71e-13	TRUE
ENST00000600004,ENST00000594234,ENST00000599369,ENST00000215057,ENST00000595245,ENST00000594108,ENST00000600048,ENST00000596039	NM_003422,NM_198055,NM_001206304,NM_001267033	MZF1	0.000476244	2	1	2	2.49e-20	TRUE
UNKNOWN	NR_027334	LOC100131691	0.000476244	3	1	2	1.68e-33	TRUE
ENST00000261973,ENST00000540173,ENST00000527432,ENST00000531500,ENST00000532683,ENST00000525321,ENST00000526754,ENST00000525161,ENST00000528081,ENST00000532192,ENST00000532483,ENST00000527449,ENST00000530978	NM_001199684,NM_021239,NM_001243829	RBM25	0.000494223	1	2	2	2.72e-06	TRUE
ENST00000289361,ENST00000476549,ENST00000425234,ENST00000450085,ENST00000465690,ENST00000427334,ENST00000506698,ENST00000414912,ENST00000082468,ENST00000513047,ENST00000502361	NM_001145008,NM_194441,NM_001145009,NM_007048	BTN3A1	0.000494223	1	2	2	0.000796194	TRUE
ENST00000584667,ENST00000583170,ENST00000578354,ENST00000355423,ENST00000584861,ENST00000577292,ENST00000542343,ENST00000579877,ENST00000578288,ENST00000583737,ENST00000579864,ENST00000293208,ENST00000580484,ENST00000582022,ENST00000580322,ENST00000583536,ENST00000578909,ENST00000580601,ENST00000584240,ENST00000583063,ENST00000581207,ENST00000583329,ENST00000578756,ENST00000581385,ENST00000584557…	NM_013260,NM_001075627,NM_001261024	SAP30BP	0.000494223	1	3	2	0.000183683	TRUE
ENST00000433119,ENST00000295757,ENST00000402259,ENST00000402271,ENST00000446613,ENST00000425430,ENST00000404040,ENST00000404548,ENST00000458642,ENST00000405478,ENST00000405025,ENST00000475818,ENST00000522202,ENST00000418189,ENST00000434848,ENST00000416248,ENST00000455904,ENST00000437379,ENST00000487585,ENST00000498532,ENST00000495099	NM_001136041,NM_024827,NM_001102056,NM_001265655	HDAC11	0.000494223	1	5	2	1.73e-21	TRUE
ENST00000405510,ENST00000216064,ENST00000405018,ENST00000406622,ENST00000411587,ENST00000455125,ENST00000470642,ENST00000477262,ENST00000469086,ENST00000464202,ENST00000430185,ENST00000438058,ENST00000456894,ENST00000480307,ENST00000420859,ENST00000452294,ENST00000494273,ENST00000433561,ENST00000417332,ENST00000439339	NM_001199580,NM_015374,NM_001199579,NM_001102319,NM_111910	SUN2	0.000494223	1	8	2	3.96e-08	TRUE
ENST00000393028,ENST00000393029,ENST00000345425,ENST00000393033,ENST00000585606,ENST00000589631,ENST00000591349,ENST00000586027,ENST00000589497,ENST00000587210,ENST00000587969,ENST00000587811,ENST00000587934,ENST00000591245	NM_202468,NM_202470,NM_202494,NM_005716,NM_202469,NM_001193018	GIPC1	0.000494223	1	2	2	2.38e-07	TRUE
UNKNOWN	NM_182832	PLAC4	0.000511405	2	3	2	5.81e-23	TRUE
ENST00000355973,ENST00000472823,ENST00000376977,ENST00000377016,ENST00000377012,ENST00000377034,ENST00000491829,ENST00000478931,ENST00000494877,ENST00000488334,ENST00000486434,ENST00000473774,ENST00000489839,ENST00000494634,ENST00000477029,ENST00000485508,ENST00000489385,ENST00000467259,ENST00000462632,ENST00000476670,ENST00000449163,ENST00000547410,ENST00000550428,ENST00000546913,ENST00000461230…	NM_001132517,NM_001470,NM_021903,NM_021904,NM_001123114,NM_001163275,NM_001098963,NM_001261276	GABBR1	0.000511405	1	8	2	4.42e-09	TRUE
ENST00000251535,ENST00000480801,ENST00000406228	NM_000697,NM_213931,NM_001192336,NM_001146148	ALOX12	0.000511405	1	3	2	2.38e-05	TRUE
ENST00000446710,ENST00000420564,ENST00000476146,ENST00000397527,ENST00000342580,ENST00000461386,ENST00000397524,ENST00000425934,ENST00000465987,ENST00000474829,ENST00000425096,ENST00000487467,ENST00000425525,ENST00000422671	NM_001169093,NM_007186	CEP250	0.000511405	1	11	2	0.00968342	TRUE
ENST00000371711	NM_004776	B4GALT5	0.000511405	1	11	2	2.19e-11	TRUE
ENST00000441714,ENST00000345046,ENST00000458587,ENST00000477175,ENST00000442093,ENST00000429550,ENST00000416815,ENST00000423827,ENST00000430088,ENST00000468947	NM_001132651,NM_001139457,NM_001139441,NM_005745,NM_001014941,NM_001256447	BCAP31	0.000511405	3	4	2	3.14e-08	TRUE
ENST00000358344,ENST00000506339,ENST00000355836,ENST00000514633,ENST00000515193,ENST00000506259,ENST00000504898,ENST00000504796	NM_205328,NM_031266,NM_004499,NM_001112695,NM_001040522,NM_001257812	HNRNPAB	0.00053074	1	8	2	7.35e-27	TRUE
ENST00000308158,ENST00000481436,ENST00000489262,ENST00000481811,ENST00000474052,ENST00000393488,ENST00000493197,ENST00000494126,ENST00000510991,ENST00000476487,ENST00000506045,ENST00000510913,ENST00000504096,ENST00000514424,ENST00000323594,ENST00000506001,ENST00000511716,ENST00000476170	NM_153373,NM_001192899,NM_001260930	AGXT2L2	0.00053074	4	13	2	4.14e-08	TRUE
ENST00000536230,ENST00000392282,ENST00000538427,ENST00000461481,ENST00000367456,ENST00000470466,ENST00000286332,ENST00000484505	NM_001133572,NM_015093,NM_001192372,NM_001257790	TAB2	0.00053074	2	7	2	1.89e-19	TRUE
ENST00000420274,ENST00000521746,ENST00000518571,ENST00000388745,ENST00000519640,ENST00000521784,ENST00000518070,ENST00000521382,ENST00000518939,ENST00000521123	NM_204698,NM_001159803,NM_001035383,NM_021623	PLEKHA2	0.00053074	1	6	2	1.03e-05	TRUE
ENST00000530686,ENST00000532965,ENST00000499568,ENST00000500662,ENST00000502161,ENST00000499008,ENST00000501176,ENST00000530313,ENST00000501663	NR_033312,NR_002832,NR_033313,NR_033314,NR_033315	BDNF-AS	0.00053074	1	5	2	6.3e-08	TRUE
ENST00000420794,ENST00000395980,ENST00000314915,ENST00000525950,ENST00000395978,ENST00000395981,ENST00000532997,ENST00000584049,ENST00000438929,ENST00000395983,ENST00000530786,ENST00000530861,ENST00000533246,ENST00000418212,ENST00000356660,ENST00000533131,ENST00000395986,ENST00000525528,ENST00000439476	NM_001031616,NM_001012441,NM_170731,NM_170732,NM_170733,NM_001709,NM_170734,NM_170735,NM_001143805,NM_001143806,NM_001143807,NM_001143808,NM_001143809,NM_001143810,NM_001143811,NM_001143812,NM_001143813,NM_001143814,NM_001143816,NM_001002975,NM_001009828,NM_001081787,NM_214259,NM_001046607,NM_001048255	BDNF	0.00053074	1	5	2	1.53e-13	TRUE
ENST00000453386,ENST00000492417,ENST00000463328,ENST00000259043,ENST00000414862,ENST00000487615,ENST00000466832,ENST00000456380,ENST00000382191,ENST00000465245,ENST00000485530,ENST00000493864,ENST00000477939,ENST00000471134,ENST00000480461,ENST00000342294	NM_204678,NM_001131942,NM_004593,NM_001077221,NM_001034776,NM_001243879,NM_001261336	TRA2B	0.000550316	1	5	2	7.07e-05	TRUE
ENST00000377126	NM_001206,NM_001011504,NM_001193214,NM_001265918	KLF9	0.000550316	1	3	2	8.68e-20	TRUE
UNKNOWN	NM_001135036,NM_145301,NM_001046152	FAM18B2	0.000550316	3	12	2	1.46e-07	TRUE
ENST00000369799,ENST00000475081,ENST00000359172,ENST00000393614,ENST00000481423,ENST00000469401	NM_001030913,NM_006621,NM_001101052,NM_001242673,NM_001242674,NM_001242675,NM_001242676,NM_001258058	AHCYL1	0.000550316	1	7	2	6.73e-10	TRUE
ENST00000405409,ENST00000449924,ENST00000414461,ENST00000262829,ENST00000397303,ENST00000359369,ENST00000463509,ENST00000416721,ENST00000495377,ENST00000438146,ENST00000408983,ENST00000491982,ENST00000397305,ENST00000473487	NM_014309,NM_001031695,NM_001082576,NM_001082577,NM_001082578,NM_001082579,NM_001205372,NM_001244837,NM_001261516	RBFOX2	0.00056947	2	20	2	4.21e-09	TRUE
ENST00000340647,ENST00000330045,ENST00000369459,ENST00000369462,ENST00000411985,ENST00000399042,ENST00000453705,ENST00000399026	NM_001132435,NM_024332,NM_001018055,NM_001075790,NM_001242640	BRCC3	0.00056947	1	2	2	2.47e-09	TRUE
ENST00000269554,ENST00000583278,ENST00000311500,ENST00000581097	NM_003559,NM_001192196	PIP4K2B	0.00056947	1	3	2	1.36e-15	TRUE
ENST00000216180,ENST00000406117,ENST00000423180,ENST00000478713,ENST00000497129	NM_025225	PNPLA3	0.00056947	1	4	2	8.78e-06	TRUE
ENST00000320954,ENST00000449224,ENST00000485310	NM_205100,NM_006371,NM_001206045,NM_001261752	CRTAP	0.00059021	1	2	2	3.94e-08	TRUE
ENST00000469583,ENST00000359316,ENST00000366913,ENST00000425560,ENST00000496078,ENST00000472447	NM_017898	MARC2	0.00059021	1	6	2	0.000558074	TRUE
ENST00000431614,ENST00000281394,ENST00000416913,ENST00000294952,ENST00000449090,ENST00000421486,ENST00000460299,ENST00000455978,ENST00000476199	NM_001012873,NM_001135629,NM_152994,NR_024188,NM_001193475,NM_001103093	PPP1R21	0.00059021	1	2	2	2.86e-06	TRUE
ENST00000427146,ENST00000306601,ENST00000463519,ENST00000366471,ENST00000533927,ENST00000476503,ENST00000366469,ENST00000477070,ENST00000412341,ENST00000482023,ENST00000451251,ENST00000470787,ENST00000462037,ENST00000474351,ENST00000478107,ENST00000491971,ENST00000496411,ENST00000468455,ENST00000483223,ENST00000533647,ENST00000496231,ENST00000495731,ENST00000528141,ENST00000497847,ENST00000530986…	NM_001099356,NM_001136036,NM_001193328,NM_017865,NM_001024496,NM_001261269	ZNF692	0.00059021	4	5	2	1.29e-21	TRUE
ENST00000379565,ENST00000544447,ENST00000379548,ENST00000540702,ENST00000479809,ENST00000457145,ENST00000492128,ENST00000438357,ENST00000474266	NM_004586,NM_001098937	RPS6KA3	0.00059021	1	7	2	1.54e-09	TRUE
ENST00000313486,ENST00000539476,ENST00000575288,ENST00000574991,ENST00000576722,ENST00000575895,ENST00000576761,ENST00000576010,ENST00000572004,ENST00000573231,ENST00000573056	NM_006224,NM_001046582,NM_001171151,NM_001260719	PITPNA	0.00059021	2	6	2	1.31e-06	TRUE
ENST00000452015,ENST00000561426,ENST00000558058,ENST00000559314,ENST00000560913,ENST00000559942,ENST00000560073,ENST00000561178,ENST00000561437	NR_026862	PPP1R3E	0.00059021	1	4	2	5.72e-30	TRUE
ENST00000544451,ENST00000360540,ENST00000519559,ENST00000522514,ENST00000519554,ENST00000519975,ENST00000521344,ENST00000521046	NM_001031019,NM_001132519,NM_052937,NM_001081526,NM_001260718	PCMTD1	0.00059021	1	4	2	4.1e-08	TRUE
ENST00000544305,ENST00000400191,ENST00000374630,ENST00000374632,ENST00000374627,ENST00000465676,ENST00000490436	NM_206951,NM_017449,NM_004442,NM_001191498	EPHB2	0.00059021	3	11	2	1.48e-14	TRUE
ENST00000467100,ENST00000319725,ENST00000465949,ENST00000487406,ENST00000472006,ENST00000492199	NM_001006199,NM_003934,NM_001101217,NM_001244285,NM_001257743	FUBP3	0.000614525	3	7	2	5.3e-19	TRUE
ENST00000541285,ENST00000399138,ENST00000490106	NM_001193988,NM_017758,NM_001205517	ALKBH5	0.000614525	1	7	2	8.37e-05	TRUE
ENST00000356244,ENST00000405486,ENST00000455915,ENST00000407260,ENST00000446258,ENST00000452543,ENST00000418067,ENST00000422838	NM_001006237,NM_001134177,NM_002883,NM_001110089,NM_116178,NM_001203237,NM_001242478	RANGAP1	0.000614525	1	6	2	4.94e-06	TRUE
ENST00000345057,ENST00000486556,ENST00000566247,ENST00000563348,ENST00000566104	NM_003789,NM_001045896	TRADD	0.000614525	1	2	2	9.19e-08	TRUE
ENST00000381556,ENST00000254718,ENST00000573116,ENST00000571368,ENST00000574934,ENST00000573723,ENST00000574547,ENST00000574167,ENST00000572759,ENST00000575662,ENST00000571354,ENST00000573175,ENST00000570986	NM_001105538,NM_014520	MYBBP1A	0.000614525	3	5	2	0.00424624	TRUE
ENST00000332556,ENST00000397181,ENST00000472564,ENST00000471046	NM_205283,NM_005561,NM_001163655,NM_001075124,NM_001246562	LAMP1	0.000614525	3	3	2	8.86e-21	TRUE
ENST00000372450,ENST00000310739,ENST00000357658,ENST00000406439,ENST00000562955,ENST00000470139,ENST00000372442,ENST00000478140,ENST00000470897,ENST00000471177,ENST00000460536	NM_015284	SZT2	0.000614525	3	4	2	6.34e-11	TRUE
ENST00000520965,ENST00000391711,ENST00000520907	NM_001037232,NM_001171979	ZNF829	0.000614525	1	1	2	0.000777834	TRUE
ENST00000378756,ENST00000378755,ENST00000536055,ENST00000339113,ENST00000439513,ENST00000429957,ENST00000400830	NM_001170536,NM_001170535,NM_018188,NM_001105462	ATAD3A	0.000614525	1	2	2	0.00190805	TRUE
ENST00000326974,ENST00000244670,ENST00000332245	NM_057161,NM_001105314,NM_001014966,NR_040101,NM_001246514	KLHDC3	0.000619231	1	3	2	6.44e-15	TRUE
ENST00000360947,ENST00000451119,ENST00000421093,ENST00000555270,ENST00000554478,ENST00000556174,ENST00000554923,ENST00000553296,ENST00000553980,ENST00000556944,ENST00000555697,ENST00000556101,ENST00000557002	NM_016423,NM_001101672,NM_001102454	ZNF219	0.000619231	2	3	2	2.54e-09	TRUE
ENST00000461377,ENST00000258781,ENST00000544363,ENST00000541586,ENST00000478582,ENST00000488727,ENST00000478169,ENST00000381112,ENST00000475551,ENST00000474617,ENST00000480658,ENST00000492883,ENST00000482714,ENST00000472223,ENST00000476594,ENST00000481194,ENST00000477605,ENST00000480382,ENST00000470837	NM_001197144,NR_030770,NM_001167935,NM_031443,NM_001029835,NM_001167934,NM_001193211,NM_001257533	CCM2	0.000619231	1	2	2	0.000613391	TRUE
ENST00000536883,ENST00000542539,ENST00000455147,ENST00000540398,ENST00000266563,ENST00000543974,ENST00000545220,ENST00000434354,ENST00000544456,ENST00000545574,ENST00000420616,ENST00000412720,ENST00000396637,ENST00000535486,ENST00000536841,ENST00000266564,ENST00000537873,ENST00000545845,ENST00000539304,ENST00000541850	NM_125012,NM_001012818,NM_000319,NM_001131024,NM_001131025,NM_001131023,NM_001131026,NM_001046183,NM_001180552	PEX5	0.000619231	1	2	2	6.87e-19	TRUE
ENST00000533589,ENST00000299163,ENST00000526476,ENST00000528044,ENST00000478787	NM_017902,NM_001083443	HIF1AN	0.000619231	3	4	2	1.2e-06	TRUE
ENST00000283921,ENST00000396344,ENST00000524368,ENST00000521421,ENST00000519593	NM_001169065,NM_001105017,NM_018951,NR_037939,NM_001206432,NM_001257354	HOXA10	0.000637036	1	2	2	1.29e-06	TRUE
ENST00000452392,ENST00000374899,ENST00000374897,ENST00000464100,ENST00000485701,ENST00000439425,ENST00000455842,ENST00000495854,ENST00000490587,ENST00000414145,ENST00000443713,ENST00000485043,ENST00000463174,ENST00000451907,ENST00000452371,ENST00000462883,ENST00000468636,ENST00000383119,ENST00000383118,ENST00000495722,ENST00000474736,ENST00000445986,ENST00000419142,ENST00000481574,ENST00000460458…	NM_123266,NM_001099357,NM_000544,NM_018833,NM_174222,NM_001206441,NM_001242747	TAP2	0.000637036	3	3	2	1.2e-08	TRUE
ENST00000261427,ENST00000295963,ENST00000510934,ENST00000438068,ENST00000513231,ENST00000503368,ENST00000445950,ENST00000510719	NM_001031540,NM_005339,NM_001111112,NM_001111113,NM_174080,NM_001246525,NM_001260841	UBE2K	0.000637036	3	13	2	5.37e-34	TRUE
ENST00000376621,ENST00000462708,ENST00000464231,ENST00000487166,ENST00000433809,ENST00000383450,ENST00000478748,ENST00000496960,ENST00000497332,ENST00000456550,ENST00000441604,ENST00000550904,ENST00000465483,ENST00000492408,ENST00000481420,ENST00000450423,ENST00000428189,ENST00000551708,ENST00000478986,ENST00000479883,ENST00000487687,ENST00000435788,ENST00000454829,ENST00000552589,ENST00000480572…	NM_123312,NM_001047139,NM_001071796,NM_001132355,NM_005275,NM_001128478,NM_001103272	GNL1	0.000637036	1	2	2	1.13e-19	TRUE
UNKNOWN	NR_033851	MGC39372	0.000637036	2	1	2	1.47e-35	TRUE
ENST00000435296,ENST00000257696,ENST00000481454,ENST00000466473	NM_001193365,NM_001098786,NM_013332,NM_001105498	HILPDA	0.000637036	1	1	2	5.75e-06	TRUE
ENST00000322723,ENST00000461347,ENST00000356936,ENST00000466274,ENST00000494618,ENST00000454824,ENST00000417652,ENST00000453992,ENST00000436894,ENST00000484328	NM_205265,NM_001133706,NM_005381,NM_001206660	NCL	0.000637036	3	3	2	0.000292391	TRUE
ENST00000311268,ENST00000535220,ENST00000428545,ENST00000541431,ENST00000382315,ENST00000541358,ENST00000542330	NM_014449,NM_019858,NM_001076217,NM_001266769	GPR162	0.000637036	1	2	2	3.7e-38	TRUE
ENST00000331238	NM_178568	RTN4RL1	0.000637036	2	8	2	4.69e-15	TRUE
ENST00000336498,ENST00000510379,ENST00000506054,ENST00000414545,ENST00000507661,ENST00000506020,ENST00000513548,ENST00000510076	NM_024605,NM_001076830	ARHGAP10	0.000637036	1	10	2	0.000334965	TRUE
ENST00000594144,ENST00000594526,ENST00000597808,ENST00000413379,ENST00000600706,ENST00000540850,ENST00000598840,ENST00000414294,ENST00000600753,ENST00000270225,ENST00000596995,ENST00000392776	NM_001133483,NR_027280,NM_001145714,NM_005500,NM_001145713,NM_001081711,NM_001246619	SAE1	0.000637036	3	13	2	1.42e-05	TRUE
ENST00000423729,ENST00000331662	NM_178557	NAT8L	0.000637036	1	4	2	1.51e-09	TRUE
ENST00000550711,ENST00000547956,ENST00000549260,ENST00000303694,ENST00000546689,ENST00000549016	NM_018413,NM_001173982,NM_001192668,NM_001258082	CHST11	0.0006635	3	21	2	3.11e-10	TRUE
ENST00000529284,ENST00000532489,ENST00000527382,ENST00000528623,ENST00000534465,ENST00000391851,ENST00000534280,ENST00000534676,ENST00000525915,ENST00000454376,ENST00000525616,ENST00000524771,ENST00000529836,ENST00000526224,ENST00000527412,ENST00000529650,ENST00000530070,ENST00000530361,ENST00000528126,ENST00000527866	NM_001132788,NM_198318,NM_001536,NR_033397,NM_001015624,NM_001207042	PRMT1	0.0006635	2	5	2	7.05e-09	TRUE
ENST00000514342,ENST00000503750,ENST00000511363,ENST00000505697,ENST00000503790,ENST00000507812,ENST00000503888,ENST00000510303,ENST00000502524,ENST00000515175,ENST00000513414,ENST00000510040,ENST00000281631,ENST00000503707,ENST00000503665,ENST00000513738,ENST00000514067,ENST00000503046,ENST00000503193,ENST00000515166,ENST00000505554,ENST00000505180,ENST00000503561	NM_001159787,NM_001178056,NM_024615,NM_001178055,NM_001192298	PARP8	0.0006635	1	4	2	0.001962	TRUE
ENST00000369797,ENST00000493610,ENST00000471061,ENST00000490787,ENST00000466959,ENST00000478543	NM_014976,NM_001102103	PDCD11	0.0006635	1	10	2	5.47e-06	TRUE
ENST00000461016,ENST00000540482,ENST00000448342,ENST00000418037,ENST00000275729,ENST00000428758,ENST00000415287,ENST00000462106,ENST00000354161,ENST00000416675,ENST00000434158,ENST00000475687,ENST00000467972,ENST00000497958,ENST00000487651,ENST00000475623,ENST00000482184	NM_020246,NM_001206286,NM_001267812,NM_001267814	SLC12A9	0.0006635	1	2	2	5.82e-08	TRUE
ENST00000374656,ENST00000478431,ENST00000415941,ENST00000479405,ENST00000430233,ENST00000482708,ENST00000436128,ENST00000484884,ENST00000427374,ENST00000472412,ENST00000383212,ENST00000498835	NM_001114959,NM_001081482,NM_002931,NM_001048128,NM_001190235,NM_001105051,NM_121076	RING1	0.0006635	2	1	2	3.54e-24	TRUE
ENST00000579695,ENST00000304046,ENST00000579287,ENST00000581284,ENST00000394169,ENST00000584220,ENST00000584000,ENST00000582052	NM_001193815,NM_001133360,NM_139280,NM_001076367	ORMDL3	0.0006635	3	3	2	7.86e-41	TRUE
ENST00000238618,ENST00000555463,ENST00000555694,ENST00000357971,ENST00000555135,ENST00000553302	NM_001168005,NM_001107,NM_203488,NM_001190198,NM_001190199,NM_001045982,NM_001245785,NM_001245876	ACYP1	0.0006635	1	2	2	2.11e-26	TRUE
ENST00000534695,ENST00000455725,ENST00000531273,ENST00000530300,ENST00000420461,ENST00000378852,ENST00000534600,ENST00000526394,ENST00000532267,ENST00000529932,ENST00000529334	NM_001006474,NM_001133144,NR_024625,NM_001142930,NM_001142931,NM_006595,NM_001144083,NM_001243747,NM_001257933	API5	0.000689508	1	2	2	8.69e-08	TRUE
ENST00000455511,ENST00000481473,ENST00000552087,ENST00000486321,ENST00000452721,ENST00000450008,ENST00000471602,ENST00000547199,ENST00000548234,ENST00000546720,ENST00000552170,ENST00000464697	NM_016238,NM_001137664,NM_001192845	ANAPC7	0.000689508	2	6	2	1.52e-06	TRUE
ENST00000469882,ENST00000484790,ENST00000465551,ENST00000357559,ENST00000305586,ENST00000475315,ENST00000491674,ENST00000468861,ENST00000491062,ENST00000479176,ENST00000445140,ENST00000472339,ENST00000484958,ENST00000480918,ENST00000484042,ENST00000461801,ENST00000473375,ENST00000461044,ENST00000498658,ENST00000476672,ENST00000482125,ENST00000481383	NM_001012601,NM_001132554,NM_001013439,NM_005087,NM_001013438,NM_001038562	FXR1	0.000689508	3	4	2	5.36e-14	TRUE
UNKNOWN	NM_001199535	TGIF2-C20ORF24	0.000689508	1	9	2	1.06e-06	TRUE
ENST00000552383,ENST00000401449,ENST00000547233,ENST00000550958,ENST00000548489,ENST00000549780,ENST00000549253,ENST00000551557,ENST00000405385,ENST00000343820,ENST00000407501,ENST00000546979,ENST00000551402,ENST00000577543,ENST00000551541,ENST00000345133,ENST00000330513,ENST00000549546,ENST00000400167,ENST00000549468,ENST00000551333,ENST00000472042	NM_205379,NM_001009815,NM_173207,NM_173210,NM_173208,NM_174886,NM_173211,NM_170695,NM_173209,NM_003244,NM_001128499,NM_001244288,NM_001244289,NM_001244290	TGIF1	0.000689508	1	4	2	0.000327248	TRUE
ENST00000360415,ENST00000395326,ENST00000431089,ENST00000398684,ENST00000338592,ENST00000486848,ENST00000415001,ENST00000492264	NR_024548,NM_001077870,NM_001142414,NM_014478,NM_001040647,NM_001040648,NM_001242429	CRCP	0.000717198	1	3	2	0.00436826	TRUE
ENST00000585509,ENST00000589297,ENST00000591455,ENST00000446868,ENST00000589296,ENST00000361101,ENST00000586299,ENST00000586175,ENST00000591574,ENST00000586430,ENST00000590775,ENST00000589768,ENST00000586043,ENST00000587308,ENST00000590300,ENST00000591095,ENST00000592497	NM_001031105,NM_017456,NM_004762,NM_001261797	CYTH1	0.000717198	1	3	2	0.000685741	TRUE
ENST00000416152,ENST00000381916,ENST00000333602,ENST00000420716,ENST00000428187,ENST00000392400,ENST00000495247,ENST00000464041,ENST00000439230,ENST00000481865,ENST00000424563,ENST00000478623,ENST00000411741,ENST00000489628,ENST00000478715,ENST00000468680,ENST00000316664,ENST00000486523,ENST00000438207,ENST00000430929,ENST00000468819,ENST00000447060,ENST00000433111,ENST00000427576	NM_001010938,NM_005781,NM_173885	TNK2	0.000717198	2	4	2	2.56e-19	TRUE
ENST00000483618,ENST00000372425,ENST00000583037,ENST00000372433,ENST00000372434,ENST00000470662,ENST00000487366,ENST00000372430,ENST00000372432,ENST00000372427,ENST00000372426,ENST00000486909,ENST00000496142,ENST00000469587	NM_031207,NM_001190880,NM_001243526	HYI	0.000717198	3	1	2	1.53e-18	TRUE
ENST00000599680,ENST00000309877,ENST00000600911,ENST00000596822,ENST00000601291,ENST00000377139,ENST00000597198,ENST00000596644,ENST00000597636,ENST00000599223,ENST00000593922,ENST00000600022,ENST00000596765,ENST00000599144,ENST00000598808,ENST00000377135,ENST00000596756,ENST00000602190,ENST00000598108,ENST00000595034,ENST00000593818,ENST00000601373,ENST00000593337,ENST00000595240,ENST00000594387…	NM_001135797,NM_001571,NM_001197122,NM_001197123,NM_001197124,NM_001197125,NM_001197126,NM_001197127,NM_001197128,NM_213770,NM_001029845,NR_045568	IRF3	0.000717198	1	6	2	2.86e-32	TRUE
ENST00000275532,ENST00000443322,ENST00000503687,ENST00000449064,ENST00000510829,ENST00000380828,ENST00000451741	NM_001039269,NM_001167961,NM_153033,NM_001102545	KCTD7	0.000717198	1	1	2	1.55e-11	TRUE
ENST00000366676,ENST00000258281,ENST00000366675,ENST00000477957,ENST00000366674	NM_001025247,NM_014409,NM_001257498	TAF5L	0.000717198	1	2	2	1.08e-11	TRUE
ENST00000469783,ENST00000296350,ENST00000296351,ENST00000489445,ENST00000439320,ENST00000491399,ENST00000473501	NM_205207,NM_033316,NM_005929,NM_001192312,NM_001081992	MFI2	0.000717198	1	3	2	4.61e-13	TRUE
ENST00000554913,ENST00000352127,ENST00000554811,ENST00000553264,ENST00000555055,ENST00000445556,ENST00000554974,ENST00000554774,ENST00000555451,ENST00000555832,ENST00000553807,ENST00000557439,ENST00000553361,ENST00000556980,ENST00000555964,ENST00000555231,ENST00000556682,ENST00000553332,ENST00000554170	NM_001006489,NM_005432,NM_001100118,NM_001100119,NM_001078117,NM_180871,NM_125127	XRCC3	0.000747509	3	7	2	0.002798	TRUE
ENST00000433218,ENST00000392351,ENST00000539827,ENST00000221222,ENST00000594794,ENST00000594439,ENST00000355887,ENST00000542541,ENST00000595756,ENST00000596482,ENST00000600077,ENST00000599808,ENST00000599097	NM_001145724,NR_027297,NM_001145722,NM_004838,NM_001145721,NM_001257689	HOMER3	0.000747509	1	1	2	5.6e-07	TRUE
ENST00000448811,ENST00000416973,ENST00000426601,ENST00000409581,ENST00000337386,ENST00000357215,ENST00000423376,ENST00000423076,ENST00000409641,ENST00000545490,ENST00000434473,ENST00000484774	NM_204268,NM_001133959,NM_005966,NM_001102039,NM_001257641	NAB1	0.000747509	1	7	2	5.9e-05	TRUE
ENST00000338304,ENST00000559884,ENST00000558686,ENST00000398121,ENST00000354296,ENST00000559163,ENST00000557932,ENST00000558784,ENST00000378819,ENST00000560956	NR_003659	WASH3P	0.000747509	1	5	2	2.73e-09	TRUE
ENST00000507881,ENST00000323249,ENST00000502922,ENST00000510492	NM_120359,NM_030567,NM_001174101,NM_001174102,NM_001192059	PRR7	0.000747509	1	5	2	2.88e-06	TRUE
ENST00000421748,ENST00000404125,ENST00000389993,ENST00000476586,ENST00000488687,ENST00000466539,ENST00000478731,ENST00000461810,ENST00000475694,ENST00000481518	NM_001006393,NM_014614,NM_001205952	PSME4	0.000747509	3	10	2	0.000256887	TRUE
ENST00000496112,ENST00000447123,ENST00000223369,ENST00000463014,ENST00000478411,ENST00000424864,ENST00000421621	NM_001113744,NM_006555,NM_001035047,NM_001179762,NM_001244914,NM_001266540	YKT6	0.000769037	1	2	2	2.76e-21	TRUE
ENST00000301364,ENST00000575049,ENST00000570951,ENST00000576112,ENST00000571806,ENST00000576202	NM_001133569,NM_018128,NM_001101933,NM_001180119	TSR1	0.000776601	1	3	2	0.000277942	TRUE
ENST00000334370,ENST00000251268,ENST00000593840,ENST00000598762,ENST00000378073,ENST00000593647,ENST00000599787	NM_001410	MEGF8	0.000776601	1	3	2	8.11e-11	TRUE
ENST00000350669,ENST00000396076,ENST00000470985,ENST00000542765,ENST00000396075,ENST00000470280,ENST00000450584,ENST00000539782,ENST00000544151,ENST00000535112	NM_204177,NM_001195809,NM_001098561,NM_002300,NM_001174097,NM_001145111,NM_001113287,NM_174100,NM_001195707,NM_001032978,NM_001198585,NM_001252164	LDHB	0.000776601	3	2	2	5.03e-05	TRUE
ENST00000392378,ENST00000358186,ENST00000392379,ENST00000441275,ENST00000479425,ENST00000446746,ENST00000455876,ENST00000477015,ENST00000483920,ENST00000434143,ENST00000432819,ENST00000495285,ENST00000431056,ENST00000445160,ENST00000468710,ENST00000492681,ENST00000476764	NM_001006547,NM_203314,NM_004051,NM_203315,NM_001034600,NM_001178202	BDH1	0.000776601	1	3	2	2.02e-07	TRUE
ENST00000464615,ENST00000265758,ENST00000421304,ENST00000432522,ENST00000421744,ENST00000496153,ENST00000478670,ENST00000441822,ENST00000423166,ENST00000436944,ENST00000428163,ENST00000463307,ENST00000423497,ENST00000430270,ENST00000487006,ENST00000430446,ENST00000442099,ENST00000453316,ENST00000471215	NM_001039332,NM_017528,NM_001202560,NR_037776,NM_001034457,NR_045512,NM_001266959	WBSCR22	0.000776601	2	6	2	9.11e-12	TRUE
ENST00000504557,ENST00000508190,ENST00000303450	NM_006897	HOXC9	0.000776601	1	1	2	3.05e-26	TRUE
ENST00000298784,ENST00000298786,ENST00000358313,ENST00000342900	NM_001131780,NM_019054	FAM35A	0.000776601	1	4	2	3.22e-06	TRUE
ENST00000512062,ENST00000307892,ENST00000514123,ENST00000515314,ENST00000561792,ENST00000568237,ENST00000568342	NM_001030581,NM_001194167,NM_001131577,NM_030579,NM_001159592,NM_001163782,NM_001242609	CYB5B	0.000776601	1	3	2	0.00128499	TRUE
ENST00000494022,ENST00000375201,ENST00000375203,ENST00000453203,ENST00000475705,ENST00000492342,ENST00000495579,ENST00000485314,ENST00000468502,ENST00000549095,ENST00000439240,ENST00000427136,ENST00000417614,ENST00000477445,ENST00000465605,ENST00000498564,ENST00000477295,ENST00000475964,ENST00000547111,ENST00000383156,ENST00000293709,ENST00000413319,ENST00000465333,ENST00000491968,ENST00000463669…	NM_001132488,NM_001136153,NM_004381,NM_001123103,NM_001083683	ATF6B	0.000802493	1	2	2	1.05e-20	TRUE
ENST00000317063,ENST00000262315,ENST00000464728,ENST00000455171,ENST00000479976,ENST00000563545,ENST00000570058,ENST00000440239,ENST00000471202,ENST00000491530,ENST00000426047,ENST00000484349,ENST00000569270,ENST00000567620,ENST00000565787,ENST00000461268,ENST00000493715,ENST00000498439,ENST00000564940	NM_022092,NM_001192460	CHTF18	0.000802493	3	6	2	0.00383187	TRUE
ENST00000397722,ENST00000454619,ENST00000448828,ENST00000444498,ENST00000460297,ENST00000219479,ENST00000382940,ENST00000433358,ENST00000450036,ENST00000468031	NM_005009,NM_001143720,NM_001077906,NM_001204461	NME4	0.000802493	2	1	2	2.03e-15	TRUE
ENST00000383331,ENST00000424675,ENST00000414008,ENST00000415276,ENST00000452334,ENST00000430914,ENST00000432497,ENST00000416945,ENST00000458660,ENST00000430277,ENST00000438084,ENST00000458434,ENST00000436256,ENST00000452180,ENST00000420800,ENST00000407772,ENST00000420467,ENST00000446297,ENST00000416551,ENST00000449665,ENST00000413992	NR_026791	HCG27	0.000802493	2	2	2	1.68e-05	TRUE
UNKNOWN	NR_049729,NR_049730	C17orf65	0.000802493	2	2	2	0.000363698	TRUE
ENST00000388802,ENST00000326382,ENST00000479294,ENST00000464752,ENST00000479284,ENST00000413003	NM_001110199	SRRM3	0.000802493	3	2	2	5.46e-18	TRUE
ENST00000341385,ENST00000378212,ENST00000338895,ENST00000491998,ENST00000378209,ENST00000468793,ENST00000339350,ENST00000477548,ENST00000378206,ENST00000475969,ENST00000481945,ENST00000461150	NM_204285,NM_004402,NM_001035109	DFFB	0.000802493	1	2	2	0.00476376	TRUE
ENST00000532465,ENST00000325327,ENST00000582871,ENST00000475819,ENST00000490554,ENST00000527409,ENST00000534495	NM_205285,NM_032737	LMNB2	0.000802493	6	4	2	5.38e-09	TRUE
ENST00000592184,ENST00000247970,ENST00000587625,ENST00000586025,ENST00000590540,ENST00000588695,ENST00000586352,ENST00000585442,ENST00000589058,ENST00000380889,ENST00000591777	NM_106017,NM_006221,NM_001034632,NR_038422,NR_038830,NM_001244371	PIN1	0.000802493	1	3	2	5.56e-09	TRUE
ENST00000254322,ENST00000396969,ENST00000598235,ENST00000595139,ENST00000596853,ENST00000595992,ENST00000594099,ENST00000601533,ENST00000598692,ENST00000596075,ENST00000601087	NM_006145,NM_001033763,NM_001244430	DNAJB1	0.000802493	1	1	2	0.000641876	TRUE
ENST00000556460,ENST00000334220,ENST00000555492,ENST00000557012,ENST00000334212,ENST00000554612,ENST00000238671,ENST00000556582,ENST00000555071,ENST00000555190,ENST00000555459,ENST00000556190,ENST00000555089,ENST00000554806,ENST00000555988,ENST00000550473	NM_001012901,NR_033814,NM_001933,NM_214397,NM_001075282,NM_001244883,NR_045209,NM_001260749	DLST	0.000802493	5	1	2	1.86e-05	TRUE
ENST00000216039,ENST00000545590,ENST00000482442,ENST00000427389,ENST00000412832,ENST00000417712,ENST00000456626,ENST00000462610,ENST00000490169,ENST00000493939	NM_001132956,NM_014876,NM_001014898,NM_001266873	JOSD1	0.000802493	2	4	2	1.85e-15	TRUE
ENST00000320270	NM_123894,NM_001085246,NM_015169,NM_001075481,NM_001180649,NM_001183713	RRS1	0.000802493	1	1	2	4.23e-28	TRUE
ENST00000455833,ENST00000355609,ENST00000416166	NM_001136265	IFFO2	0.000807867	1	4	2	1.61e-18	TRUE
ENST00000371532,ENST00000371528	NM_001004339,NM_001205891	ZYG11A	0.000807867	2	6	2	0.00353287	TRUE
ENST00000515800,ENST00000274376,ENST00000456692,ENST00000506290,ENST00000512763,ENST00000509953	NM_001131793,NM_002890,NM_022650,NM_174449	RASA1	0.000807867	1	2	2	1.16e-09	TRUE
ENST00000367635,ENST00000495034,ENST00000367634,ENST00000324778,ENST00000477383,ENST00000415888,ENST00000480743,ENST00000367632,ENST00000478871	NM_001006532,NM_152663,NM_001191426	RALGPS2	0.000807867	2	3	2	2.01e-07	TRUE
ENST00000523023,ENST00000221138,ENST00000518564,ENST00000518532,ENST00000522113,ENST00000520334,ENST00000523804,ENST00000518243,ENST00000520056,ENST00000520500	NM_205124,NM_001009552,NM_001075857,NM_001101707,NM_001260748	PPP2CB	0.000807867	1	5	2	3.2e-29	TRUE
ENST00000221200,ENST00000519665,ENST00000523140,ENST00000522493,ENST00000518067,ENST00000518997,ENST00000523294,ENST00000521458,ENST00000524217,ENST00000520405,ENST00000517914	NM_001012839,NM_017634,NM_001102269,NM_001260902	KCTD9	0.000807867	2	4	2	1.21e-34	TRUE
ENST00000369016,ENST00000369014,ENST00000369009,ENST00000361532,ENST00000361631,ENST00000509582,ENST00000339643,ENST00000271690,ENST00000356527,ENST00000513281,ENST00000505321,ENST00000503345,ENST00000354702,ENST00000503241,ENST00000362052	NM_001007965,NM_207168,NM_004436,NM_207042,NM_207043,NM_207044,NM_207045,NM_207046,NM_207047,NM_214174,NM_174050	ENSA	0.000840476	1	6	2	2.87e-43	TRUE
ENST00000327532,ENST00000486487,ENST00000488595,ENST00000469243,ENST00000466301,ENST00000473850,ENST00000490472,ENST00000467030,ENST00000492010	NM_173543,NM_001170538	DZIP1L	0.000840476	1	6	2	0.00122271	TRUE
ENST00000369135,ENST00000417191,ENST00000479905	NM_020205,NM_001144093,NM_001266823	OTUD7B	0.000840476	1	9	2	1.24e-31	TRUE
ENST00000357903,ENST00000348990,ENST00000354192,ENST00000346798,ENST00000359726,ENST00000358918,ENST00000448388,ENST00000440126,ENST00000439274,ENST00000464867,ENST00000456209,ENST00000448850,ENST00000415997,ENST00000491395,ENST00000474136,ENST00000463070,ENST00000548570,ENST00000462267,ENST00000466453	NM_204308,NM_001013018,NM_001133542,NM_001204301,NM_001204302,NM_001204303,NM_001136130,NM_001136129,NM_000484,NM_201413,NM_201414,NM_001136016,NM_001136131,NM_001006601,NM_214372,NM_001076796	APP	0.000840476	2	10	2	1.78e-07	TRUE
ENST00000457167,ENST00000587727,ENST00000426588,ENST00000588814,ENST00000316603,ENST00000585693,ENST00000586335,ENST00000590197,ENST00000590847,ENST00000589810,ENST00000588641,ENST00000590348,ENST00000591153,ENST00000589576,ENST00000590774,ENST00000589586,ENST00000585866,ENST00000589773,ENST00000590886,ENST00000591787,ENST00000589547,ENST00000587380,ENST00000586240	NM_001031502,NM_001132671,NR_029431,NM_003315,NM_001144766,NM_001205976,NM_001261251	DNAJC7	0.000840476	2	4	2	1.14e-14	TRUE
ENST00000352632,ENST00000595535,ENST00000344104,ENST00000338932,ENST00000598249,ENST00000598775,ENST00000597389,ENST00000392025,ENST00000392023,ENST00000596900,ENST00000593932,ENST00000599926,ENST00000593816,ENST00000596411,ENST00000595690	NM_020971,NM_025213,NM_001192910	SPTBN4	0.000840476	1	4	2	0.00048052	TRUE
ENST00000510763,ENST00000509119,ENST00000507123,ENST00000506360,ENST00000502669,ENST00000382521,ENST00000245105,ENST00000539824,ENST00000515682,ENST00000457650,ENST00000504822,ENST00000503284,ENST00000504223,ENST00000512100,ENST00000507891,ENST00000508641,ENST00000514274,ENST00000508438,ENST00000509553,ENST00000511002,ENST00000502350,ENST00000508183,ENST00000513495,ENST00000507801,ENST00000502559	NM_001134679,NM_018986	SH3TC1	0.000840476	1	6	2	0.000142458	TRUE
ENST00000291634,ENST00000397826,ENST00000458015,ENST00000479127,ENST00000485207	NM_058190,NM_001046108	FAM207A	0.000840476	1	9	2	2.94e-23	TRUE
ENST00000360635,ENST00000355346,ENST00000238091,ENST00000483795,ENST00000490426,ENST00000497031,ENST00000464228,ENST00000359712,ENST00000465527,ENST00000460720,ENST00000488451,ENST00000470507,ENST00000456913,ENST00000482798,ENST00000492079,ENST00000463190,ENST00000494563,ENST00000467606,ENST00000484735,ENST00000460001,ENST00000497105	NM_001133221,NM_004763,NM_022334,NM_001034448	ITGB1BP1	0.000875573	1	6	2	1.35e-08	TRUE
ENST00000283629,ENST00000492136,ENST00000447368,ENST00000466441,ENST00000283628,ENST00000486388,ENST00000464787,ENST00000411650,ENST00000490112,ENST00000467613,ENST00000481761,ENST00000456378,ENST00000496310	NM_001128161,NM_014517,NM_001128160,NM_001180181,NM_128838,NM_001266788	UBP1	0.000875573	1	5	2	2.53e-07	TRUE
ENST00000229416,ENST00000509541,ENST00000515580,ENST00000510837,ENST00000504353,ENST00000514373,ENST00000504525,ENST00000514004,ENST00000505294,ENST00000513939,ENST00000514933,ENST00000505197	NM_001498,NM_001197115,NM_001083674,NM_001261107	GCLC	0.000875573	1	3	2	4.39e-05	TRUE
ENST00000591500,ENST00000524242,ENST00000334586,ENST00000425015,ENST00000392503,ENST00000421794,ENST00000590045	NM_180990,NM_001010955,NM_001191252	ZACN	0.000875573	1	4	2	0.00784003	TRUE
ENST00000360802,ENST00000449054,ENST00000379238,ENST00000379235,ENST00000379239,ENST00000539807,ENST00000474372,ENST00000488443,ENST00000418786,ENST00000379225,ENST00000412543,ENST00000421278,ENST00000462799,ENST00000480885,ENST00000459988	NM_018449,NM_001191276	UBAP2	0.000875573	4	6	2	1.33e-07	TRUE
ENST00000539243,ENST00000587186,ENST00000313093,ENST00000536472,ENST00000587602,ENST00000591293,ENST00000590214,ENST00000586866,ENST00000543365,ENST00000592335,ENST00000586033,ENST00000590577,ENST00000586937,ENST00000590512,ENST00000586378,ENST00000592297,ENST00000591169	NM_001030937,NM_001133892,NM_012292,NM_001205741,NM_001258328,NR_047652	HMHA1	0.000875573	1	6	2	8.57e-10	TRUE
ENST00000378710,ENST00000360522,ENST00000357210,ENST00000520777,ENST00000355826,ENST00000518681,ENST00000505820,ENST00000479659,ENST00000489635,ENST00000511502,ENST00000477990,ENST00000514363,ENST00000487053,ENST00000502470,ENST00000378712,ENST00000507082,ENST00000463492,ENST00000510793,ENST00000504599,ENST00000507229,ENST00000503789,ENST00000378708,ENST00000506488,ENST00000512004,ENST00000508455…	NM_001006301,NR_033183,NM_001170687,NM_080875,NM_001170688,NM_001170686,NM_001170689	MIB2	0.000875573	2	5	2	2.56e-07	TRUE
ENST00000367975,ENST00000342751,ENST00000515731,ENST00000432287,ENST00000513009,ENST00000392169,ENST00000504963,ENST00000470743,ENST00000513700	NM_001193587,NM_001035511,NM_001035512,NM_003001,NM_001035513,NM_175814	SDHC	0.000875573	3	2	2	3.62e-35	TRUE
ENST00000570103,ENST00000283882,ENST00000564793,ENST00000562602,ENST00000569341,ENST00000570279,ENST00000566901,ENST00000565646,ENST00000564286,ENST00000566254	NM_001001189,NM_001194469,NM_006324,NM_174268	CFDP1	0.000913338	1	4	2	5.1e-15	TRUE
ENST00000451356,ENST00000599795,ENST00000593537,ENST00000301411,ENST00000595857,ENST00000594938	NM_001194831,NM_006179,NM_001190429,NM_001243713	NTF4	0.000913338	1	2	2	1.03e-07	TRUE
ENST00000456545,ENST00000308354,ENST00000339162,ENST00000397760,ENST00000452226,ENST00000397761,ENST00000436754,ENST00000426493,ENST00000429812,ENST00000409141,ENST00000265810,ENST00000409417,ENST00000416159,ENST00000448520,ENST00000491330,ENST00000464275,ENST00000443561	NM_198042,NM_021630,NM_176871,NM_001034430	PDLIM2	0.000913338	1	4	2	6.31e-08	TRUE
ENST00000261735,ENST00000455836,ENST00000553161,ENST00000552052,ENST00000546477	NM_001195735,NM_006817,NM_001034025,NM_001076271,NM_001126354	ERP29	0.000913338	1	4	2	2.85e-24	TRUE
ENST00000493223,ENST00000278795,ENST00000305958,ENST00000339123,ENST00000484515,ENST00000346595,ENST00000602910,ENST00000379460,ENST00000457205,ENST00000494098,ENST00000486998,ENST00000466004	NM_175839,NM_175842,NM_175840,NM_175841,NM_001185170,NM_001270691,NM_001205439	SMOX	0.000913338	1	7	2	1.57e-05	TRUE
ENST00000255608,ENST00000589685,ENST00000592895,ENST00000587825,ENST00000592082,ENST00000587225,ENST00000589200,ENST00000590646,ENST00000587742,ENST00000588395	NM_017797	BTBD2	0.000913338	1	2	2	0.00365206	TRUE
ENST00000540508,ENST00000538604,ENST00000391411,ENST00000426261,ENST00000468381,ENST00000535846,ENST00000412778	NM_001113434	C17orf51	0.000954472	1	2	2	7.51e-05	TRUE
ENST00000307750	NM_014872,NM_001077937,NM_001261623	ZBTB5	0.000954472	1	4	2	4.42e-06	TRUE
ENST00000011684,ENST00000536531,ENST00000538208,ENST00000396988,ENST00000449001,ENST00000543000,ENST00000535616,ENST00000544743,ENST00000304581	NM_018173,NM_001144856,NM_001144857	PLEKHG6	0.000954472	2	2	2	1.42e-05	TRUE
ENST00000422163,ENST00000446079,ENST00000491100,ENST00000480090,ENST00000313601,ENST00000536647,ENST00000441156,ENST00000440628,ENST00000451956,ENST00000490122,ENST00000266027,ENST00000468422,ENST00000492383	NM_205402,NM_002070,NM_001166425,NM_001003364,NM_001123116,NM_001101040,NM_001162566,NM_001258107	GNAI2	0.000954472	1	2	2	1.69e-06	TRUE
ENST00000602198,ENST00000253435,ENST00000601707,ENST00000598265	NM_001130011,NM_031451,NM_001101252	TEX101	0.000954472	2	1	2	1.5e-07	TRUE
ENST00000338282,ENST00000452625,ENST00000396324,ENST00000573908,ENST00000576790,ENST00000300036,ENST00000576164,ENST00000571275,ENST00000574119,ENST00000570785,ENST00000571910,ENST00000571505	NM_205274,NM_001040113,NM_022844,NM_001040114,NM_002474,NM_001102127,NM_001082308,NM_001246444	MYH11	0.000954472	1	4	2	0.000336617	TRUE
ENST00000381697,ENST00000412718,ENST00000465545	NM_001009610	FAM22D	0.000954472	2	5	2	1.44e-06	TRUE
ENST00000330842,ENST00000409749,ENST00000447030,ENST00000430053,ENST00000487961,ENST00000469508	NM_212556	ASB18	0.000994841	1	11	2	2.12e-05	TRUE
ENST00000298992,ENST00000435224,ENST00000530814	NM_145804	ABTB2	0.000994841	4	10	2	0.0037964	TRUE
ENST00000017003,ENST00000509778,ENST00000507602,ENST00000376550,ENST00000511654,ENST00000574840,ENST00000571021	NM_001001785,NM_001009086,NM_022167,NM_001008714,NM_001008667	XYLT2	0.000994841	2	3	2	5.61e-06	TRUE
UNKNOWN	NR_040060,NR_040061,NR_040062,NR_040059	LOC100131089	0.000994841	1	4	2	0.000136728	TRUE
ENST00000441864,ENST00000246785,ENST00000246784,ENST00000594157,ENST00000598979,ENST00000601168,ENST00000600947,ENST00000598306,ENST00000594793	NM_138639,NM_001040668,NM_001101148	BCL2L12	0.000994841	1	4	2	1.76e-31	TRUE
ENST00000293748,ENST00000479510,ENST00000418600,ENST00000449372,ENST00000496374,ENST00000428982,ENST00000495633,ENST00000486399,ENST00000470232,ENST00000551507,ENST00000461459,ENST00000455687,ENST00000395071,ENST00000414753,ENST00000490978,ENST00000355818,ENST00000484671,ENST00000481000	NM_006772,NM_001205466	SYNGAP1	0.000994841	1	3	2	1.78e-11	TRUE
ENST00000313597,ENST00000480506,ENST00000373917,ENST00000358215,ENST00000443704,ENST00000373908,ENST00000455657,ENST00000435316,ENST00000341142,ENST00000481170,ENST00000493655,ENST00000480034,ENST00000496536	NM_001169098,NM_205847,NM_013335,NM_001206175,NM_001244657,NM_001244658,NM_001257524	GMPPA	0.000994841	1	3	2	4.54e-17	TRUE
ENST00000375050,ENST00000495300,ENST00000478678,ENST00000496171,ENST00000480254,ENST00000453487,ENST00000551389,ENST00000549406,ENST00000549520,ENST00000471428,ENST00000498292,ENST00000498723,ENST00000494427,ENST00000453961,ENST00000547363,ENST00000552094,ENST00000553136,ENST00000461857,ENST00000485304,ENST00000488105,ENST00000476638,ENST00000431537,ENST00000548572,ENST00000546976,ENST00000549894…	NM_002586,NM_001123157,NM_001256883	PBX2	0.0010266	1	4	2	2.28e-29	TRUE
ENST00000409975,ENST00000357765,ENST00000409347,ENST00000423713,ENST00000393493,ENST00000466492	NM_001195448,NM_014044,NM_001014921	UNC50	0.0010266	1	2	2	6.33e-29	TRUE
ENST00000303277,ENST00000382936,ENST00000536901,ENST00000460722,ENST00000476253,ENST00000480360	NM_001031168,NM_138385,NM_001127266,NM_001076864	TMEM129	0.0010266	1	1	2	4.01e-13	TRUE
ENST00000262888,ENST00000600909,ENST00000598836,ENST00000597184,ENST00000599720,ENST00000601549,ENST00000600408,ENST00000599107	NM_002250,NM_214018,NM_001076905	KCNN4	0.0010266	1	2	2	1.18e-06	TRUE
ENST00000319084,ENST00000435905,ENST00000377674,ENST00000488936,ENST00000482360,ENST00000498342,ENST00000466813,ENST00000466941	NM_001044642,NM_001133152,NM_005341,NM_001192979	ZBTB48	0.0010266	2	5	2	1.14e-07	TRUE
ENST00000545111,ENST00000394232,ENST00000557410,ENST00000557291,ENST00000330276,ENST00000553727	NM_001167580,NM_014848,NM_001083448,NM_001260629	SV2B	0.0010266	1	1	2	0.00286907	TRUE
ENST00000291552,ENST00000380276,ENST00000475639,ENST00000464750,ENST00000459639,ENST00000478282,ENST00000471250,ENST00000398137,ENST00000486519,ENST00000463599,ENST00000496462,ENST00000468039	NM_204655,NM_001025203,NM_001025204,NM_006758,NM_001080268	U2AF1	0.0010266	1	1	2	1.93e-20	TRUE
ENST00000262971,ENST00000599999,ENST00000600566,ENST00000593518,ENST00000596144,ENST00000601439	NM_015897,NM_001083482	PIAS4	0.0010266	2	2	2	5.71e-12	TRUE
ENST00000375792,ENST00000375787,ENST00000483792,ENST00000480913,ENST00000375789,ENST00000469963,ENST00000437288,ENST00000416410,ENST00000436437,ENST00000488119,ENST00000411456,ENST00000413532,ENST00000494205,ENST00000493926,ENST00000443533,ENST00000475648,ENST00000436457,ENST00000455919,ENST00000434107,ENST00000490665,ENST00000437889,ENST00000430482,ENST00000496782,ENST00000488668,ENST00000451411…	NM_013974,NM_001034704,NM_001260633	DDAH2	0.0010266	2	2	2	2.1e-32	TRUE
ENST00000558945,ENST00000558457,ENST00000500949,ENST00000561275,ENST00000560706,ENST00000559368,ENST00000560545,ENST00000561226,ENST00000557993,ENST00000501665	NR_026757	OIP5-AS1	0.00103817	2	2	2	1.2e-10	TRUE
ENST00000397843,ENST00000356641,ENST00000532993,ENST00000529970,ENST00000530388,ENST00000528225,ENST00000525960,ENST00000532823,ENST00000525222,ENST00000530747,ENST00000531616,ENST00000526067,ENST00000528681	NM_015313,NM_001198665,NM_001123033	ARHGEF12	0.00103817	2	5	2	0.000449333	TRUE
ENST00000450976,ENST00000418281,ENST00000340957,ENST00000433578,ENST00000418768,ENST00000383847,ENST00000497070,ENST00000453072,ENST00000310585,ENST00000487702	NM_144635,NM_001171093,NM_001076118,NM_001243359	FAM131A	0.00103817	1	1	2	1.62e-09	TRUE
ENST00000503445,ENST00000505459,ENST00000506997,ENST00000512790,ENST00000282999,ENST00000515463,ENST00000515755,ENST00000445150,ENST00000506987,ENST00000509024,ENST00000504696	NM_001131982,NM_003135,NM_001204193,NM_001204194,NM_001204196,NM_001204199,NM_001034478,NM_001242420,NM_001252291	SRP19	0.00103817	1	3	2	0.00857797	TRUE
ENST00000337351,ENST00000293872,ENST00000426094,ENST00000397783,ENST00000490762,ENST00000429378,ENST00000468732,ENST00000464711,ENST00000442701,ENST00000419516,ENST00000397780,ENST00000495349,ENST00000418978,ENST00000430864,ENST00000443357,ENST00000494366,ENST00000469109,ENST00000428363,ENST00000467552,ENST00000494545	NM_001169050,NM_001133049,NM_201412,NM_018032,NM_001080301	LUC7L	0.00103817	2	2	2	2.92e-08	TRUE
ENST00000323013,ENST00000416699,ENST00000483303	NM_001194373,NM_001132351,NM_015703,NM_001110074,NM_001198822	RRP7A	0.00103817	1	1	2	0.00573363	TRUE
ENST00000575322,ENST00000337714,ENST00000314126,ENST00000571629,ENST00000575186,ENST00000570423,ENST00000573085,ENST00000572814,ENST00000574683,ENST00000572557,ENST00000481416,ENST00000539273,ENST00000576591,ENST00000572156,ENST00000576295,ENST00000573326,ENST00000575032,ENST00000572560	NM_003488,NM_001204773,NM_001242902,NM_001242903,NM_001261641	AKAP1	0.00103817	1	3	2	1.19e-16	TRUE
ENST00000329565	NM_001193439,NM_003498,NM_001113722	SNN	0.00103817	1	2	2	1.94e-06	TRUE
ENST00000582161,ENST00000395511,ENST00000579099,ENST00000578426,ENST00000579303,ENST00000581020,ENST00000577350,ENST00000346603,ENST00000583388,ENST00000581463	NM_001133909,NM_015510,NM_001035343,NM_001261025	DHRS7B	0.00103817	2	2	2	1.3e-07	TRUE
ENST00000455578,ENST00000359906,ENST00000421475,ENST00000434218	NR_027786	SERHL	0.00103817	1	1	2	0.000850746	TRUE
ENST00000526958,ENST00000227155,ENST00000342935,ENST00000532544,ENST00000529277,ENST00000525210,ENST00000525898,ENST00000527737,ENST00000524704,ENST00000525813,ENST00000529853,ENST00000530601,ENST00000530931,ENST00000524750	NM_001008470,NM_001024844,NM_002231,NM_001145218,NM_001097990	CD82	0.00103817	1	3	2	4.77e-29	TRUE
UNKNOWN	NR_036527,NR_036528,NR_036529	LOC100499484-C9ORF174	0.00103817	1	2	2	0.000745048	TRUE
ENST00000593039,ENST00000591723,ENST00000592181,ENST00000588372,ENST00000394589,ENST00000345365,ENST00000360276,ENST00000586044,ENST00000335858,ENST00000588594,ENST00000587977,ENST00000590016,ENST00000586210,ENST00000460118,ENST00000590380,ENST00000587405,ENST00000592577,ENST00000590631,ENST00000415064,ENST00000587982,ENST00000592430,ENST00000585947,ENST00000585982,ENST00000592928,ENST00000586186…	NM_001084010,NM_100649,NM_001198646,NR_037711,NM_002878,NM_133629,NM_001142571,NR_037712,NM_001046304	RAD51D	0.00108305	1	3	2	0.000832545	TRUE
ENST00000373662,ENST00000423432,ENST00000218432,ENST00000373669,ENST00000439980,ENST00000496835,ENST00000446576	NM_179592,NM_126203,NR_033187,NM_001170747,NM_006223,NM_001105657,NM_001178291,NM_001247255,NM_001245417	PIN4	0.00108305	1	5	2	1.02e-35	TRUE
ENST00000373825,ENST00000373822,ENST00000423325,ENST00000346162,ENST00000361690,ENST00000505885,ENST00000507292,ENST00000502969,ENST00000510290,ENST00000373821,ENST00000508473,ENST00000512445,ENST00000513367,ENST00000507909	NM_001131683,NR_034069,NM_003137,NM_001144113	SRPK1	0.00108305	2	5	2	3.5e-11	TRUE
ENST00000562759,ENST00000478497,ENST00000485386	NM_001100880,NR_037652,NM_001199757,NR_037653,NM_001100879	ST20	0.00113254	1	7	2	2.92e-13	TRUE
ENST00000367811,ENST00000472647,ENST00000493481,ENST00000530739,ENST00000525440,ENST00000483228,ENST00000528517,ENST00000480478,ENST00000524967,ENST00000469474,ENST00000485609,ENST00000472984,ENST00000491225,ENST00000527460	NM_013330,NM_197972,NM_001015656	NME7	0.00113254	2	5	2	2.33e-12	TRUE
ENST00000356876,ENST00000377782,ENST00000480393,ENST00000485036,ENST00000513135,ENST00000473343,ENST00000351959,ENST00000510563,ENST00000502730,ENST00000502588,ENST00000348333,ENST00000351748,ENST00000414040,ENST00000453260,ENST00000475730,ENST00000469691,ENST00000481401,ENST00000461703,ENST00000453341,ENST00000515145	NM_001039664,NM_003790,NM_148965,NM_148966,NM_148967,NM_148970,NM_001144077	TNFRSF25	0.00113254	1	2	2	3.16e-06	TRUE
ENST00000331410,ENST00000448667,ENST00000481472,ENST00000483089,ENST00000488485,ENST00000493485,ENST00000447047,ENST00000379724,ENST00000465438,ENST00000468705,ENST00000481108,ENST00000494186	NM_213603,NM_001013258,NM_001105470,NM_001244408	ZNF789	0.00113254	2	5	2	1.2e-05	TRUE
ENST00000435235,ENST00000469679,ENST00000350320,ENST00000399034,ENST00000399035,ENST00000475109,ENST00000493626,ENST00000494488,ENST00000425198,ENST00000473201,ENST00000432293,ENST00000492940,ENST00000485569	NM_001012559,NM_001197121,NM_001009103,NM_001135363,NM_001133400,NM_001011553,NM_001788,NM_001001168,NM_001242956,NM_001258100	SEPT7	0.00113254	1	6	2	0.000245114	TRUE
ENST00000371142,ENST00000485093,ENST00000490192,ENST00000443638,ENST00000464654,ENST00000475401	NM_020123,NM_001193217	TM9SF3	0.00113254	2	2	2	8.24e-23	TRUE
UNKNOWN	NR_038956,NR_038957	LOC100506714	0.00113254	1	5	2	0.00038286	TRUE
ENST00000397981,ENST00000545011,ENST00000468058,ENST00000397983,ENST00000397979,ENST00000475022,ENST00000494348,ENST00000465324,ENST00000498118	NM_145185,NM_001161879	MAP2K7	0.00113254	3	4	2	6.87e-16	TRUE
ENST00000523037,ENST00000265229,ENST00000439747,ENST00000522038,ENST00000519059,ENST00000520040,ENST00000518364	NM_001194584,NM_001132873,NM_014180,NM_001014990,NM_001035454,NM_001183015	MRPL22	0.001181	1	2	2	2.63e-10	TRUE
ENST00000576370,ENST00000573912,ENST00000572088,ENST00000576084,ENST00000572558,ENST00000574821,ENST00000574989,ENST00000299335,ENST00000571584	NM_001195440,NM_001162861,NR_027941,NR_027942,NM_001162862,NM_004375,NM_001083403,NM_001183946	COX11	0.001181	1	2	2	4.35e-08	TRUE
ENST00000291576,ENST00000456705,ENST00000486126,ENST00000471490,ENST00000494310,ENST00000476948	NM_001135528,NM_005049,NM_001178769,NM_101414,NM_202107,NM_001257755	PWP2	0.001181	1	2	2	0.000267118	TRUE
UNKNOWN	NR_033854	LOC283335	0.001181	1	3	2	6.96e-49	TRUE
ENST00000342784,ENST00000600440,ENST00000597977,ENST00000600252,ENST00000602203	NM_033025	SYDE1	0.001181	2	2	2	0.00628185	TRUE
ENST00000309446,ENST00000421199,ENST00000423015,ENST00000412414,ENST00000458272,ENST00000467833,ENST00000435602,ENST00000426163,ENST00000457962,ENST00000451244	NM_003709,NM_001097487,NM_001192919,NR_073108,NM_001270944,NM_001270942,NM_001270943	KLF7	0.001181	1	4	2	2.13e-12	TRUE
ENST00000395892,ENST00000375780,ENST00000375779,ENST00000375784,ENST00000423804,ENST00000447338,ENST00000447369,ENST00000457485,ENST00000415179,ENST00000431921,ENST00000438708,ENST00000422167,ENST00000433916,ENST00000420458,ENST00000434202,ENST00000456863,ENST00000435242,ENST00000442045,ENST00000423055,ENST00000418285,ENST00000400058,ENST00000383405,ENST00000383404,ENST00000400052,ENST00000451546…	NM_001288,NM_001015608,NM_001082111,NM_001252138	CLIC1	0.001181	1	2	2	9.32e-21	TRUE
ENST00000307145,ENST00000558921,ENST00000560473,ENST00000558844,ENST00000558673,ENST00000500533,ENST00000558225	NM_015995,NM_001011505,NM_001083533	KLF13	0.001181	2	8	2	9.26e-05	TRUE
ENST00000379902,ENST00000314276,ENST00000549498,ENST00000551302,ENST00000451358,ENST00000314250,ENST00000552403,ENST00000549311,ENST00000549700,ENST00000552570,ENST00000546602,ENST00000551693,ENST00000549789,ENST00000547223,ENST00000602335,ENST00000546759,ENST00000551583,ENST00000546772,ENST00000550660,ENST00000552168,ENST00000550048	NM_170754,NM_198316,NM_015319	TENC1	0.001181	1	4	2	8.82e-14	TRUE
ENST00000367627,ENST00000367625,ENST00000483887,ENST00000352445,ENST00000472001,ENST00000447595,ENST00000495145	NM_022371,NM_001080376,NM_001265670	TOR3A	0.001181	1	4	2	5.52e-15	TRUE
ENST00000298838,ENST00000539589,ENST00000532457,ENST00000533686,ENST00000528462,ENST00000530513,ENST00000528201,ENST00000531226,ENST00000525725,ENST00000524509,ENST00000530405	NM_001044652,NM_016223,NM_001184974,NM_001184975,NM_001191420,NM_001245300,NM_001266225	PACSIN3	0.001181	1	3	2	2e-17	TRUE
ENST00000320785,ENST00000574165,ENST00000572959,ENST00000573815	NM_001131349,NM_006612,NM_001205802,NM_001266243	KIF1C	0.001181	1	6	2	4.13e-06	TRUE
ENST00000568871,ENST00000534964,ENST00000261844,ENST00000546305,ENST00000568637,ENST00000399202,ENST00000570204,ENST00000566948,ENST00000568668,ENST00000562135,ENST00000566768,ENST00000561490,ENST00000561543,ENST00000568863,ENST00000562351	NM_001005811,NM_019600	FAM214A	0.00123144	2	2	2	7.24e-22	TRUE
ENST00000393203,ENST00000496699,ENST00000497385	NM_020440	PTGFRN	0.00123144	1	10	2	2.86e-11	TRUE
ENST00000602840,ENST00000518127,ENST00000520210,ENST00000520242,ENST00000519487,ENST00000284811,ENST00000522337,ENST00000523815,ENST00000519082	NM_001007888,NM_001198677,NM_001046493,NM_005648,NM_001204857,NM_001204858,NM_001204859,NM_001204860,NM_001204861,NM_001204862,NM_001204863,NM_001204864,NM_001246227,NM_001252005	TCEB1	0.00123144	1	2	2	1.94e-29	TRUE
UNKNOWN	NR_047651	LOC100289137	0.00123144	1	4	2	1.31e-21	TRUE
ENST00000159087,ENST00000597643,ENST00000600711	NM_020959	ANO8	0.00123144	1	2	2	2.11e-07	TRUE
ENST00000261880,ENST00000538028,ENST00000561452,ENST00000542650,ENST00000558725,ENST00000560362,ENST00000561229	NM_001131313,NM_024666,NM_001098896,NM_001271528	AAGAB	0.00129029	1	1	2	8.47e-07	TRUE
ENST00000396593,ENST00000311052,ENST00000561530,ENST00000567554,ENST00000565287,ENST00000567908,ENST00000570125,ENST00000568117,ENST00000568968,ENST00000563815,ENST00000562843,ENST00000569398,ENST00000569572,ENST00000562586,ENST00000567626	NM_014316,NM_001042476,NM_001045951,NM_001261063	CARHSP1	0.00129029	1	6	2	1.39e-12	TRUE
ENST00000341653,ENST00000358402,ENST00000394606,ENST00000555932,ENST00000284165,ENST00000358664,ENST00000555419,ENST00000553928,ENST00000557277,ENST00000556892,ENST00000553951,ENST00000556979,ENST00000555667,ENST00000557746,ENST00000556443,ENST00000246163,ENST00000556702,ENST00000554709	NM_197957,NM_002382,NM_145112,NM_145113,NM_145114,NM_001009866,NM_001105633,NM_001261369,NM_001271068,NM_001271069,NR_073137,NR_073138	MAX	0.00129029	1	4	2	1.85e-07	TRUE
ENST00000344795,ENST00000492721,ENST00000483815,ENST00000491113,ENST00000373852,ENST00000342422,ENST00000494506	NM_018840,NR_026562,NM_001199534,NM_199483	C20orf24	0.00131931	1	2	2	3.97e-06	TRUE
ENST00000541682,ENST00000317814,ENST00000577735	NM_032580,NM_001165967,NM_001206279	HES7	0.00131931	5	1	2	7.01e-18	TRUE
ENST00000539229,ENST00000433100,ENST00000342456,ENST00000007633,ENST00000316367,ENST00000529232,ENST00000531459,ENST00000434449,ENST00000530046,ENST00000525518,ENST00000527179,ENST00000526609,ENST00000527514	NM_001161473,NM_000694,NM_001030010,NM_001075518	ALDH3B1	0.00131931	1	1	2	2.93e-08	TRUE
ENST00000301012,ENST00000565149,ENST00000562981,ENST00000561895,ENST00000569177,ENST00000567064,ENST00000568133,ENST00000563785,ENST00000568709,ENST00000563170,ENST00000566636,ENST00000565720,ENST00000562651,ENST00000565610,ENST00000563463,ENST00000562741,ENST00000565842	NM_002461,NM_001075424,NM_001260543	MVD	0.00131931	1	1	2	4.77e-19	TRUE
ENST00000391826,ENST00000601717,ENST00000341114,ENST00000595948,ENST00000593956,ENST00000596022,ENST00000597295,ENST00000596011	NM_152899,NM_172374,NM_001099351,NM_001258017,NM_001258018,NR_047577	IL4I1	0.00131931	1	5	2	1.65e-05	TRUE
ENST00000327827	NM_014117	C16orf72	0.00131931	1	1	2	3.99e-08	TRUE
ENST00000264938,ENST00000514375,ENST00000507407	NM_004174,NM_001192154	SLC9A3	0.00131931	2	3	2	4.32e-42	TRUE
ENST00000470472,ENST00000460428,ENST00000468598,ENST00000471991,ENST00000485365,ENST00000490668,ENST00000466213,ENST00000466745,ENST00000485454,ENST00000357214	NM_005066,NM_001206291,NM_001251847	SFPQ	0.00131931	2	1	2	0.00926398	TRUE
ENST00000216410,ENST00000554421,ENST00000554230,ENST00000557604,ENST00000553987	NM_001132226,NM_198066,NM_001075559,NM_001243376,NM_001260699	GNPNAT1	0.00131931	1	1	2	0.000680237	TRUE
ENST00000491064,ENST00000443891,ENST00000492545,ENST00000473420,ENST00000498160,ENST00000273062,ENST00000497677,ENST00000494067,ENST00000452977,ENST00000428361,ENST00000496785,ENST00000431127,ENST00000488627,ENST00000482272,ENST00000464255	NM_001193873,NM_182642,NM_021198,NM_001192440,NM_001206878	CTDSP1	0.00131931	1	1	2	2.47e-06	TRUE
ENST00000430857,ENST00000477022,ENST00000300176,ENST00000262935,ENST00000474713,ENST00000429987	NM_006076,NM_001206722	AGFG2	0.00134968	2	7	2	4.84e-08	TRUE
ENST00000297533,ENST00000392818,ENST00000462940,ENST00000482202,ENST00000476627,ENST00000488752,ENST00000492838	NM_001194233,NM_031434,NM_001136044,NM_001034675,NM_001244336	TMUB1	0.00134968	2	2	2	1.54e-42	TRUE
ENST00000375151	NM_001193626,NM_058163,NM_001035097,NM_001182323	TSR2	0.00134968	1	1	2	2.38e-46	TRUE
ENST00000394417,ENST00000466642,ENST00000484142,ENST00000467648,ENST00000482668,ENST00000497510,ENST00000483461,ENST00000480679,ENST00000483108,ENST00000487469,ENST00000493222,ENST00000467400,ENST00000487640,ENST00000337130,ENST00000475550,ENST00000484056,ENST00000488245,ENST00000497883,ENST00000445915,ENST00000496334,ENST00000467999,ENST00000475462,ENST00000487042,ENST00000491621,ENST00000472047…	NM_121737,NM_204111,NM_001133003,NM_006759,NM_001001521,NM_213980,NM_174212,NM_180506,NM_001261518	UGP2	0.00134968	1	7	2	2.43e-25	TRUE
ENST00000391859,ENST00000597033,ENST00000426897,ENST00000598095,ENST00000323906,ENST00000595725,ENST00000593512,ENST00000597852,ENST00000535669,ENST00000596426,ENST00000598134,ENST00000597602,ENST00000595660,ENST00000594743,ENST00000600121	NM_001040031,NM_001774,NM_001046011	CD37	0.00134968	1	2	2	4.87e-26	TRUE
ENST00000356654,ENST00000396684,ENST00000544325,ENST00000541029,ENST00000537488	NM_113672,NM_001034165,NM_001007026,NM_001940,NM_001205748	ATN1	0.0014105	1	6	2	2.22e-05	TRUE
ENST00000558928,ENST00000394412,ENST00000445906	NM_198525	KIF7	0.0014105	1	2	2	4.9e-06	TRUE
ENST00000368361,ENST00000361168,ENST00000355560,ENST00000476983,ENST00000497188,ENST00000536801,ENST00000471047,ENST00000484699	NM_001031326,NM_003993,NM_001206264	CLK2	0.0014105	1	4	2	1.74e-16	TRUE
ENST00000580114,ENST00000421453,ENST00000264009,ENST00000518227,ENST00000518603,ENST00000523360,ENST00000522870,ENST00000522295,ENST00000434833,ENST00000522023,ENST00000521314,ENST00000523562,ENST00000521624,ENST00000584272,ENST00000521374,ENST00000517685,ENST00000523077,ENST00000517729,ENST00000519224,ENST00000517750,ENST00000517680,ENST00000522027,ENST00000522459,ENST00000519105,ENST00000517867…	NM_119862,NM_001172374,NM_001040667,NM_001538,NM_001048121,NM_001191202	HSF4	0.0014105	1	3	2	0.00494861	TRUE
ENST00000402550,ENST00000440612,ENST00000452318,ENST00000402394,ENST00000405600,ENST00000312734,ENST00000404694,ENST00000260595,ENST00000467539	NM_001166240,NM_001166241,NM_006569,NM_001166239,NM_001045977	CGREF1	0.0014105	1	2	2	6.08e-05	TRUE
ENST00000370025,ENST00000370022,ENST00000467302,ENST00000370021,ENST00000485810	NR_037185,NM_018061	PRPF38B	0.0014105	1	2	2	7.26e-06	TRUE
ENST00000434816,ENST00000396872,ENST00000444741,ENST00000297195,ENST00000406453,ENST00000439491	NM_153247,NM_001040661,NM_001193196	SLC29A4	0.00147857	1	1	2	0.00171274	TRUE
ENST00000274605	NM_001031607,NM_015111,NM_001205742	N4BP3	0.00147857	1	4	2	8.82e-07	TRUE
UNKNOWN	NR_037861	PPT2-EGFL8	0.00147857	1	2	2	2.74e-06	TRUE
ENST00000568999,ENST00000564207,ENST00000562764,ENST00000258187,ENST00000569404,ENST00000569539,ENST00000564126,ENST00000562725,ENST00000565304,ENST00000567667,ENST00000394282,ENST00000567454,ENST00000564867,ENST00000566065,ENST00000421602,ENST00000569578,ENST00000561779,ENST00000567063,ENST00000565430,ENST00000566041,ENST00000566061,ENST00000565434,ENST00000394279,ENST00000564486,ENST00000561724…	NM_022910,NM_001130487,NM_020465,NM_001075695,NM_001242833,NM_001242834,NM_001242835,NM_001242836,NR_040072	NDRG4	0.00147857	1	2	2	0.00606118	TRUE
ENST00000373248,ENST00000307864,ENST00000482166	NM_001133471,NM_032797,NM_001198696,NM_001040556,NM_001245543	AIFM2	0.0015519	1	1	2	2.24e-25	TRUE
ENST00000488633,ENST00000469320,ENST00000272402,ENST00000491394	NM_004804,NM_001037482,NM_001258112	CIAO1	0.0015519	1	2	2	1.03e-08	TRUE
UNKNOWN	NR_040772,NR_040773	LOC100505666	0.0015519	3	5	2	4.75e-05	TRUE
ENST00000462592,ENST00000214893,ENST00000339450,ENST00000489219,ENST00000543230,ENST00000381506,ENST00000487088,ENST00000475005	NM_024896	ERMP1	0.00162531	1	3	2	1.08e-07	TRUE
ENST00000269499,ENST00000588676,ENST00000585873,ENST00000591632,ENST00000586834,ENST00000591435,ENST00000585949,ENST00000587612,ENST00000591145,ENST00000590840	NM_017742	ZCCHC2	0.00162531	1	1	2	1.65e-13	TRUE
ENST00000588465,ENST00000590382,ENST00000407327,ENST00000335757,ENST00000588688,ENST00000590857,ENST00000586078,ENST00000588409,ENST00000592293,ENST00000588393,ENST00000589561,ENST00000588214,ENST00000591194,ENST00000586549,ENST00000590475	NM_001133264,NM_001145056,NM_020428,NM_001098139	SLC44A2	0.00168788	1	1	2	9.25e-05	TRUE
ENST00000454859,ENST00000531967,ENST00000474289,ENST00000368295,ENST00000454591,ENST00000528402,ENST00000479525,ENST00000368291,ENST00000309620,ENST00000475319,ENST00000430841,ENST00000368289,ENST00000417628,ENST00000368292,ENST00000488087,ENST00000436638,ENST00000460558,ENST00000461239,ENST00000525745,ENST00000534442,ENST00000526299,ENST00000474240,ENST00000531582,ENST00000368287	NM_001098573,NM_001133414,NM_001139510,NM_001002030,NM_001105544,NM_001105545,NM_018479,NM_001035415,NM_001261505	ECHDC1	0.00168788	2	3	2	5.85e-35	TRUE
ENST00000409826,ENST00000417645,ENST00000306406,ENST00000465296	NM_183240,NM_001034744	TMEM37	0.00168788	1	1	2	3.09e-06	TRUE
ENST00000601048,ENST00000509570,ENST00000593892,ENST00000599874,ENST00000601419,ENST00000595615,ENST00000599302,ENST00000599590,ENST00000598273,ENST00000595509,ENST00000598956,ENST00000598083,ENST00000601937,ENST00000599627,ENST00000602163	NM_001166327,NM_001199908,NM_001042737,NM_001154577,NM_001133657,NM_003009,NM_001115012,NM_001170422,NM_213977,NM_001163225	SEPW1	0.00168788	3	3	2	4.57e-06	TRUE
ENST00000370544,ENST00000495705,ENST00000370542,ENST00000489303	NM_204112,NM_006769,NM_001112686,NM_001034751,NM_001257841	LMO4	0.00168788	1	3	2	2.16e-23	TRUE
ENST00000533839,ENST00000263578,ENST00000534011,ENST00000529802,ENST00000442061,ENST00000525770,ENST00000525083,ENST00000526525,ENST00000527004,ENST00000526366,ENST00000524751,ENST00000532101,ENST00000532125,ENST00000534315,ENST00000531257,ENST00000527875,ENST00000533395,ENST00000530642,ENST00000532590	NM_017547,NR_037647,NR_037648,NM_001034371,NM_001244921	FOXRED1	0.00168788	2	3	2	4.95e-11	TRUE
ENST00000261868,ENST00000424492,ENST00000535391,ENST00000558227,ENST00000558053,ENST00000536248,ENST00000558353	NM_001012771,NM_001132675,NM_003758,NM_001076143,NM_001261052	EIF3J	0.00168788	1	1	2	2.72e-16	TRUE
UNKNOWN	NR_036494	LOC643201	0.00170138	2	3	2	0.00808901	TRUE
UNKNOWN	NR_027284	LINC00602	0.00170138	1	1	2	1.39e-10	TRUE
ENST00000445576,ENST00000428388,ENST00000437001,ENST00000585246,ENST00000422437,ENST00000453656,ENST00000583227,ENST00000479001,ENST00000421600,ENST00000333845,ENST00000395512,ENST00000581472,ENST00000432129,ENST00000466239,ENST00000482938,ENST00000489721,ENST00000414111,ENST00000433364,ENST00000418522,ENST00000482403,ENST00000492224,ENST00000489013,ENST00000447331,ENST00000399648,ENST00000422193…	NM_001194641,NM_030652,NR_037860,NM_001123111,NM_001099187	EGFL8	0.00170138	1	1	2	3.56e-08	TRUE
ENST00000249066,ENST00000358502,ENST00000451256,ENST00000529194,ENST00000454728,ENST00000476579,ENST00000489186,ENST00000473549,ENST00000484830	NM_145637,NM_030882	APOL2	0.00170138	2	5	2	2.09e-35	TRUE
ENST00000321895	NM_022903,NM_001046000,NM_001246466,NM_001266198	CCDC71	0.00178219	1	1	2	5.61e-19	TRUE
ENST00000221561,ENST00000592414,ENST00000586742,ENST00000327141,ENST00000587393,ENST00000592330,ENST00000590067,ENST00000586839,ENST00000585557,ENST00000587083,ENST00000585782,ENST00000586003	NM_198969,NM_198970,NM_001130,NM_001128497	AES	0.00178219	1	3	2	1.05e-17	TRUE
ENST00000263212,ENST00000407142,ENST00000538191,ENST00000496143,ENST00000397495,ENST00000484588,ENST00000445205,ENST00000424647,ENST00000486259,ENST00000497072	NM_014634	PPM1F	0.00178219	2	2	2	0.000143273	TRUE
ENST00000270328,ENST00000595838,ENST00000593913,ENST00000597188,ENST00000596851,ENST00000596911,ENST00000593826,ENST00000596236,ENST00000601163,ENST00000601872,ENST00000596709,ENST00000596466,ENST00000593534	NM_030957,NM_001205750,NM_001246250,NM_001265632	ADAMTS10	0.00178219	1	2	2	3.18e-05	TRUE
ENST00000310823,ENST00000497134,ENST00000478059	NM_001008682,NM_003183,NM_001099926	ADAM17	0.00187131	2	4	2	1.25e-05	TRUE
ENST00000309502,ENST00000367236,ENST00000337894,ENST00000367235,ENST00000464019,ENST00000472535,ENST00000467253	NM_204316,NM_001131239,NM_001048230,NM_000674,NM_001003279,NM_174497,NM_001261667	ADORA1	0.00187131	1	4	2	1.57e-06	TRUE
ENST00000270238,ENST00000600059	NM_001080434	LMTK3	0.00187131	1	1	2	3.74e-16	TRUE
ENST00000373640,ENST00000477463,ENST00000463834	NM_001144994	C2orf72	0.00187131	1	2	2	5.06e-07	TRUE
ENST00000396062,ENST00000216330,ENST00000557324,ENST00000556231	NM_204641,NM_002013,NM_001038112,NM_001244157	FKBP3	0.00187131	1	2	2	0.0012419	TRUE
ENST00000261783,ENST00000557120,ENST00000556491,ENST00000557319	NM_001199704,NM_001172,NM_001145120,NM_001017942,NM_001082181,NM_001181504,NM_001246922,NM_001261253	ARG2	0.00196062	1	1	2	1.61e-21	TRUE
ENST00000285106,ENST00000412036,ENST00000589940,ENST00000590901,ENST00000587342,ENST00000587170,ENST00000586144,ENST00000586568,ENST00000586502,ENST00000590234,ENST00000591190,ENST00000591474,ENST00000592078,ENST00000589548,ENST00000586837,ENST00000586365,ENST00000587396	NM_014593,NM_001101654,NM_001024517,NM_001266065	CXXC1	0.00196062	1	3	2	3.72e-14	TRUE
ENST00000342694,ENST00000464810,ENST00000421267,ENST00000447210,ENST00000448821,ENST00000469249	NM_174126,NM_001178877,NM_003995,NM_001205340,NM_001244322	NPR2	0.00196062	1	1	2	1.46e-06	TRUE
ENST00000319283,ENST00000441302,ENST00000452389,ENST00000453680,ENST00000422110,ENST00000431601,ENST00000479927,ENST00000476334,ENST00000427459,ENST00000470910,ENST00000419156,ENST00000489587,ENST00000466443,ENST00000488479,ENST00000473827,ENST00000479124,ENST00000437458,ENST00000411813,ENST00000416741,ENST00000493851,ENST00000492064,ENST00000413243,ENST00000441081,ENST00000493938,ENST00000493751…	NM_001030963,NM_031899,NM_001046518	GORASP1	0.00196062	1	3	2	0.00129211	TRUE
ENST00000513088,ENST00000341832,ENST00000340677,ENST00000317673,ENST00000407249,ENST00000341028	NM_033486,NM_033487,NM_033488,NM_033489,NM_033492,NM_033493	CDK11B	0.00205565	1	3	2	5.47e-23	TRUE
ENST00000293973	NM_006181,NM_001206905	NTN3	0.00214922	1	1	2	1.57e-19	TRUE
ENST00000368575,ENST00000462680,ENST00000495720,ENST00000484297	NM_002870,NM_001024540,NM_001261291	RAB13	0.00214922	2	1	2	8.91e-31	TRUE
ENST00000356554,ENST00000482811,ENST00000449370,ENST00000421535,ENST00000422329	NM_006699,NM_001206877,NM_001261288	MAN1A2	0.00214922	1	3	2	5.14e-12	TRUE
ENST00000540458,ENST00000229264,ENST00000541257,ENST00000541978,ENST00000435982,ENST00000539127,ENST00000542868,ENST00000537035,ENST00000542751	NM_002075,NM_001003004,NM_001192347,NM_001243493,NM_001266130	GNB3	0.00214922	1	3	2	0.000304518	TRUE
ENST00000264158,ENST00000539493,ENST00000442034,ENST00000425393,ENST00000487003,ENST00000489858,ENST00000497080	NM_012233,NM_001172435,NM_001083483	RAB3GAP1	0.0021609	1	4	2	0.000310034	TRUE
ENST00000515499,ENST00000315073,ENST00000351937,ENST00000508930,ENST00000503114,ENST00000515223,ENST00000515834,ENST00000514219,ENST00000510072	NM_001030672,NM_033549,NM_201627,NM_001206165,NR_045218	TRIM41	0.0021609	1	5	2	1.77e-40	TRUE
ENST00000567684,ENST00000326152,ENST00000569303,ENST00000566606	NM_000196,NM_001081926,NM_213913,NM_174642,NM_001082752	HSD11B2	0.0021609	1	1	2	1.02e-05	TRUE
ENST00000434410,ENST00000232854,ENST00000448997,ENST00000455834,ENST00000482974,ENST00000424388,ENST00000443894	NM_016173,NM_001035308	HEMK1	0.0021609	1	3	2	4.31e-06	TRUE
ENST00000372733,ENST00000537976	NM_001007869,NM_001169028,NM_001133906,NM_002999,NM_214284,NM_001257434	SDC4	0.0021609	2	2	2	2.28e-18	TRUE
ENST00000215570,ENST00000591871	NM_012458,NM_001080277,NM_001261039	TIMM13	0.00218864	1	1	2	1.53e-17	TRUE
ENST00000574727,ENST00000573104,ENST00000576636,ENST00000574271,ENST00000570835,ENST00000571201,ENST00000570890,ENST00000570921,ENST00000572215,ENST00000572357,ENST00000575787,ENST00000574183	NR_002710	ALOX12P2	0.00227328	2	1	2	0.000241291	TRUE
ENST00000240343	NM_080677,NM_001113303,NM_001242621	DYNLL2	0.00227328	1	1	2	2.31e-40	TRUE
ENST00000339697,ENST00000368454	NM_001031074,NM_001132252,NM_020755,NM_001035427,NM_001257550	SERINC1	0.00227328	1	1	2	0.00108977	TRUE
ENST00000251203,ENST00000558276,ENST00000557978,ENST00000559264,ENST00000558222,ENST00000559735	NM_025245,NM_001192515,NR_038198	PBX4	0.00239465	1	1	2	3.97e-05	TRUE
ENST00000545387,ENST00000402551,ENST00000316273,ENST00000593515,ENST00000597011,ENST00000599246,ENST00000599510,ENST00000598162,ENST00000595376,ENST00000601681,ENST00000601496,ENST00000596981	NM_001131336,NR_028450,NR_028451,NM_001190,NM_001164773,NM_001013593	BCAT2	0.00239465	1	1	2	2.32e-05	TRUE
ENST00000473905,ENST00000533732,ENST00000480331,ENST00000527418,ENST00000368410,ENST00000355956,ENST00000368412,ENST00000360674,ENST00000359280,ENST00000449910,ENST00000356955,ENST00000526491,ENST00000529473,ENST00000531703,ENST00000477533,ENST00000271836,ENST00000461564,ENST00000368413,ENST00000485346,ENST00000487956,ENST00000531455,ENST00000531831,ENST00000447332,ENST00000472434,ENST00000534019…	NM_207191,NM_207194,NM_207197,NM_003815,NM_207195,NM_207196,NM_001205442,NM_001261464,NM_001261465,NM_001261466,NR_048577,NR_048578,NR_048579	ADAM15	0.00239465	3	4	2	0.00659675	TRUE
ENST00000312962,ENST00000536689,ENST00000537363,ENST00000478863,ENST00000361821,ENST00000537433,ENST00000543842,ENST00000539027,ENST00000536714,ENST00000432197,ENST00000543682,ENST00000546063,ENST00000537964,ENST00000544397	NM_023008,NM_001110072,NM_001183146	KRI1	0.00251508	1	5	2	0.00182192	TRUE
ENST00000509864,ENST00000508394,ENST00000514685,ENST00000506595,ENST00000511854,ENST00000505128,ENST00000337581,ENST00000243112,ENST00000513838,ENST00000505662,ENST00000401977,ENST00000514196,ENST00000511522,ENST00000504338,ENST00000509078,ENST00000507904,ENST00000503447,ENST00000504797,ENST00000506169,ENST00000503306,ENST00000505597,ENST00000503231	NM_001194757,NM_014311,NM_001014958,NM_001243787,NM_001243788,NM_001243789,NM_001243791,NM_001243790,NR_045039	SMUG1	0.00251508	1	3	2	3.55e-09	TRUE
ENST00000477033,ENST00000370167,ENST00000433144,ENST00000342782	NM_001395,NM_001193027,NM_001265730	DUSP9	0.00251508	1	1	2	4.06e-11	TRUE
ENST00000215582	NM_173481	C19orf21	0.00264058	1	4	2	0.00219401	TRUE
ENST00000560255	NR_028330	C15orf37	0.00264058	1	1	2	9.31e-22	TRUE
ENST00000348959,ENST00000261173,ENST00000359142,ENST00000428670,ENST00000393164,ENST00000550716,ENST00000552275,ENST00000551009,ENST00000549727,ENST00000549585,ENST00000551310	NM_001168002,NM_001001323,NM_001682,NM_001197084,NM_214352,NM_174696,NM_001101719	ATP2B1	0.00268721	1	2	2	0.00499997	TRUE
ENST00000447799,ENST00000392876,ENST00000415849,ENST00000474268,ENST00000465502	NM_001031701	NT5DC3	0.00270434	2	1	2	9.29e-06	TRUE
ENST00000526809,ENST00000279263,ENST00000524986,ENST00000528026,ENST00000533766,ENST00000534371,ENST00000533646,ENST00000529601,ENST00000540748,ENST00000525385,ENST00000345348,ENST00000531321,ENST00000529292,ENST00000529414,ENST00000526085,ENST00000530650,ENST00000530750,ENST00000524690,ENST00000530892,ENST00000531029,ENST00000529233,ENST00000527851,ENST00000534667,ENST00000532328,ENST00000527968…	NM_003273,NM_174622	TM7SF2	0.00270434	1	2	2	2.06e-12	TRUE
ENST00000369800,ENST00000522853,ENST00000520919	NM_001142651	NEURL1B	0.00270434	4	2	2	0.000392346	TRUE
ENST00000263207,ENST00000344269,ENST00000495096,ENST00000406259,ENST00000406522,ENST00000401994,ENST00000480792,ENST00000473551,ENST00000487793,ENST00000492625,ENST00000462319,ENST00000467828	NM_204465,NM_001670,NM_001105380	ARVCF	0.00270434	1	2	2	9.58e-06	TRUE
ENST00000372022,ENST00000468290	NM_001030682,NM_001194177,NM_006753,NM_001075529	SURF6	0.00270434	2	1	2	1.07e-13	TRUE
ENST00000467672,ENST00000402859,ENST00000444995,ENST00000402785,ENST00000474163,ENST00000484509,ENST00000468442	NM_182492,NM_001135772	LRP5L	0.00278129	1	3	2	4.61e-07	TRUE
ENST00000455114,ENST00000450020,ENST00000005995,ENST00000570629,ENST00000570594,ENST00000574813,ENST00000571141,ENST00000577043,ENST00000575199,ENST00000574265,ENST00000575739	NM_144956,NM_144957,NM_006799,NR_073012,NM_001270452	PRSS21	0.00278129	4	4	2	0.00599833	TRUE
ENST00000272937,ENST00000409160,ENST00000409002,ENST00000409182,ENST00000417803,ENST00000409574,ENST00000409356,ENST00000436051,ENST00000450098	NM_018645,NM_001142853,NM_001075949	HES6	0.00292852	2	1	2	4.59e-11	TRUE
ENST00000511998,ENST00000433902,ENST00000383461,ENST00000537780,ENST00000502789	NR_026991	H1FX-AS1	0.00292852	1	2	2	1.66e-23	TRUE
ENST00000239367,ENST00000546019,ENST00000463728,ENST00000367368,ENST00000472053	NM_001206831,NM_032832	LRP11	0.00292852	1	1	2	5.98e-06	TRUE
ENST00000256545,ENST00000527822,ENST00000528949,ENST00000532113	NM_020154,NM_001099143	EMC7	0.00292852	1	2	2	5.87e-25	TRUE
ENST00000327726,ENST00000592860	NM_001928,NM_001034255	CFD	0.00308145	2	1	2	7.31e-23	TRUE
ENST00000406310,ENST00000000442,ENST00000539594,ENST00000405666,ENST00000468670,ENST00000467987,ENST00000545035	NM_001002936,NM_001170521,NM_001191373,NM_004451	ESRRA	0.00308145	2	3	2	3.91e-13	TRUE
ENST00000562798,ENST00000471231,ENST00000338343,ENST00000380310,ENST00000562319,ENST00000565690,ENST00000427128,ENST00000566320,ENST00000565939	NM_001099784,NM_001265720	FBXL19	0.00342138	1	2	2	5.3e-28	TRUE
ENST00000534355,ENST00000533321,ENST00000388857,ENST00000528798,ENST00000534386	NM_170746	C11orf31	0.00342138	1	1	2	8.15e-18	TRUE
ENST00000247833,ENST00000325555,ENST00000417413,ENST00000483530,ENST00000378815,ENST00000549760,ENST00000550536,ENST00000362025,ENST00000378809,ENST00000552199,ENST00000547591,ENST00000550647,ENST00000547055,ENST00000551641,ENST00000553099,ENST00000526994,ENST00000550847,ENST00000550437,ENST00000481897,ENST00000552610	NM_001131126,NM_022456,NM_175625,NM_175623,NM_001024647,NM_175624,NM_001046347,NM_001135415	RAB3IP	0.00342138	1	1	2	1.04e-09	TRUE
ENST00000361298,ENST00000372645,ENST00000372635,ENST00000372634,ENST00000299872	NM_001194916,NM_014380,NM_206917,NM_206915,NM_001163777,NM_001244827,NM_001244828	NGFRAP1	0.00342138	1	2	2	2.14e-22	TRUE
ENST00000261712,ENST00000578213,ENST00000457654,ENST00000578397,ENST00000579451,ENST00000481992,ENST00000580904,ENST00000584340,ENST00000493026,ENST00000469475,ENST00000585265	NM_002815,NM_001046148,NM_001270482	PSMD11	0.00342138	1	3	2	0.00692346	TRUE
ENST00000344147,ENST00000479629,ENST00000373714,ENST00000546109,ENST00000422613,ENST00000490049	NM_206978,NM_001133352,NM_016505,NM_001034652,NM_001261640	ZCCHC17	0.00342138	1	1	2	0.000407121	TRUE
ENST00000541015,ENST00000250916,ENST00000592313	NM_031918,NM_001164009	KLF16	0.00342138	2	3	2	1.37e-11	TRUE
ENST00000294117	NM_012202,NM_174073,NM_001267786	GNG3	0.00342138	1	1	2	9.48e-07	TRUE
ENST00000295228	NM_205206,NM_002193,NM_001164842,NM_176852	INHBB	0.00342202	1	1	2	6.2e-12	TRUE
ENST00000425696,ENST00000380087,ENST00000330735,ENST00000380084,ENST00000465244,ENST00000404022,ENST00000481586,ENST00000444437,ENST00000416035,ENST00000486166,ENST00000468092,ENST00000493145	NM_204670,NM_001198719,NM_002893,NM_001034638,NM_001205352,NM_001261191	RBBP7	0.00342202	1	2	2	8.46e-05	TRUE
ENST00000397542,ENST00000358353,ENST00000349570,ENST00000531177,ENST00000531899,ENST00000532949,ENST00000526077,ENST00000534311,ENST00000531088,ENST00000529337	NM_021924,NM_031264,NM_001171968,NM_001103326	CDHR5	0.00360331	2	1	2	2.24e-05	TRUE
ENST00000413040,ENST00000568733,ENST00000566856,ENST00000355851,ENST00000468404,ENST00000470229,ENST00000470316,ENST00000483358,ENST00000493588,ENST00000480907,ENST00000477666,ENST00000497987,ENST00000460712,ENST00000480714	NM_001159792,NM_016118,NM_001080906,NM_001243351	NUB1	0.00360331	1	1	2	2.1e-05	TRUE
ENST00000312438,ENST00000533438,ENST00000528474	NM_013246,NM_001166212	CLCF1	0.00360331	1	1	2	2.31e-12	TRUE
ENST00000421306,ENST00000262483,ENST00000576664,ENST00000572795,ENST00000575201	NM_031220,NM_001165966	PITPNM3	0.00379461	1	6	2	2.04e-09	TRUE
UNKNOWN	NM_033420,NM_001033026	C19orf6	0.00379461	1	2	2	0.00109387	TRUE
ENST00000247161,ENST00000376983,ENST00000592066,ENST00000480157,ENST00000343894,ENST00000468956	NM_005229,NM_001114123,NM_001191236,NM_001257168,NM_001257188	ELK1	0.00399309	1	1	2	1.03e-06	TRUE
UNKNOWN	NR_034014,NR_034015	LOC100131060	0.00399309	1	1	2	0.00984402	TRUE
ENST00000396008,ENST00000333761	NM_018280	C22orf26	0.00399309	1	2	2	2.08e-05	TRUE
ENST00000335870,ENST00000486371,ENST00000462724,ENST00000481584,ENST00000488917	NM_012256	ZNF212	0.00399309	1	1	2	0.00185965	TRUE
ENST00000361716,ENST00000400911,ENST00000544432,ENST00000535180,ENST00000396308,ENST00000538970,ENST00000535927,ENST00000539047	NM_001039486,NM_016830,NM_199245,NM_014231,NM_001075630,NM_001261331	VAMP1	0.00421308	1	2	2	1.11e-06	TRUE
ENST00000482954,ENST00000476279,ENST00000247866,ENST00000461457,ENST00000465506,ENST00000464564,ENST00000204307,ENST00000476181,ENST00000464566,ENST00000460088,ENST00000472695,ENST00000476470,ENST00000471136,ENST00000462847,ENST00000475276,ENST00000479181	NM_001071798,NM_004546,NM_175828,NM_001244885,NM_001245765	NDUFB2	0.00421308	1	1	2	0.000104163	TRUE
UNKNOWN	NR_024014	PP14571	0.00427799	2	1	2	6.72e-06	TRUE
ENST00000228515,ENST00000548206,ENST00000548981,ENST00000550533,ENST00000552899,ENST00000546935,ENST00000552680,ENST00000550461	NM_030809,NM_001192458,NR_045072	CSRNP2	0.00427799	1	1	2	0.000298368	TRUE
ENST00000394583,ENST00000340281,ENST00000361911,ENST00000370447,ENST00000455342	NM_001006533,NM_001131855,NM_182976,NM_182975,NM_001206028,NM_001267024	ZNF326	0.00427799	1	1	2	1.24e-27	TRUE
ENST00000274979,ENST00000402530,ENST00000402430,ENST00000475532,ENST00000471606,ENST00000451047,ENST00000487192,ENST00000481071,ENST00000459928	NM_001001891,NM_001001666	ANO7	0.00427799	1	1	2	0.000314825	TRUE
ENST00000371974,ENST00000495952,ENST00000437995,ENST00000463965	NM_112672,NM_001012653,NM_003172	SURF1	0.00427799	2	1	2	1.22e-06	TRUE
ENST00000568223,ENST00000570132,ENST00000219542,ENST00000567076,ENST00000564661,ENST00000568415	NM_024042,NM_001102026	METRN	0.00443229	2	1	2	7.06e-16	TRUE
ENST00000374296	NM_001163651,NM_178422,NM_213739,NM_001038553	PAQR7	0.00467663	2	2	2	2.04e-27	TRUE
ENST00000266557,ENST00000541233	NM_001242,NM_001082434	CD27	0.00493065	1	1	2	2.08e-05	TRUE
ENST00000400282,ENST00000582141,ENST00000581816	NR_027349,NR_027350	MIR17HG	0.00493065	1	1	2	0.00416042	TRUE
ENST00000361910,ENST00000497931,ENST00000538627,ENST00000539247,ENST00000462302,ENST00000467089,ENST00000495964,ENST00000494624	NR_033669,NR_033670,NM_001009584,NM_001184768,NM_019007,NM_001078125	ARMCX6	0.00520793	1	1	2	6.49e-08	TRUE
UNKNOWN	NR_026817	LOC148696	0.00520793	1	1	2	4.84e-11	TRUE
ENST00000520515,ENST00000518409,ENST00000536186,ENST00000435240,ENST00000520693,ENST00000519312,ENST00000265334,ENST00000518990,ENST00000523054,ENST00000521118,ENST00000521755,ENST00000523832,ENST00000520592,ENST00000435211,ENST00000522501	NM_016508,NM_001113575,NM_001192854	CDKL3	0.00520793	1	1	2	0.00183846	TRUE
ENST00000368374,ENST00000486869,ENST00000459805,ENST00000473223,ENST00000486197,ENST00000313929,ENST00000566701,ENST00000463838,ENST00000462587	NR_002188	GBAP1	0.00534034	2	1	2	0.000672152	TRUE
ENST00000341885,ENST00000468695,ENST00000492007,ENST00000373506,ENST00000467652,ENST00000498691,ENST00000436661,ENST00000478041,ENST00000473294,ENST00000373501,ENST00000476493,ENST00000488075,ENST00000465588,ENST00000483138,ENST00000479075,ENST00000473383,ENST00000466361	NM_178547,NM_001076288	ZBTB8OS	0.00549676	1	2	2	0.00344569	TRUE
ENST00000403299,ENST00000488141,ENST00000467812,ENST00000251973,ENST00000406271,ENST00000437756,ENST00000486118,ENST00000433485,ENST00000476871,ENST00000494166	NM_014550	CARD10	0.00549676	1	1	2	3.31e-05	TRUE
ENST00000446880,ENST00000543656,ENST00000443642,ENST00000450199	NM_001039517	RUSC1-AS1	0.00549676	1	2	2	2.63e-07	TRUE
ENST00000464240,ENST00000474861,ENST00000483260,ENST00000256644,ENST00000602318,ENST00000602858,ENST00000531779	NM_006402	LAMTOR5	0.00580477	1	1	2	3.24e-14	TRUE
ENST00000222219,ENST00000588777,ENST00000538460,ENST00000592506,ENST00000586547	NM_001131328,NM_001375,NM_214196,NM_001075127	DNASE2	0.00612634	1	1	2	1.82e-09	TRUE
ENST00000522927,ENST00000523214,ENST00000276692,ENST00000523631,ENST00000519548,ENST00000522810,ENST00000518485,ENST00000517678,ENST00000519776,ENST00000521546,ENST00000521973,ENST00000522310,ENST00000520321,ENST00000519232,ENST00000520938,ENST00000523888,ENST00000523152,ENST00000518133,ENST00000522280	NR_027427,NM_032026,NM_001146160,NM_001075402,NM_001244525	TATDN1	0.00612634	1	1	2	2.7e-05	TRUE
ENST00000397333,ENST00000462829,ENST00000541489,ENST00000329073,ENST00000545991,ENST00000546058	NM_175066	DDX51	0.00659356	1	1	2	8.49e-10	TRUE
ENST00000306014,ENST00000314045,ENST00000549271,ENST00000551912,ENST00000546898,ENST00000550016,ENST00000548786,ENST00000551344,ENST00000552375,ENST00000546869	NM_001111322,NM_024072	DDX54	0.00684302	1	1	2	3.8e-10	TRUE
ENST00000409257,ENST00000591256,ENST00000589256,ENST00000592988,ENST00000589107,ENST00000588199,ENST00000588800,ENST00000591952,ENST00000327898,ENST00000586542,ENST00000586731,ENST00000591538,ENST00000587750,ENST00000589664,ENST00000585419	NR_027083,NM_001010982,NM_001145526,NM_001192502	AFMID	0.00764153	1	1	2	6.13e-09	TRUE
ENST00000375205,ENST00000411667,ENST00000375202,ENST00000395220,ENST00000357054,ENST00000472746,ENST00000494917,ENST00000460482,ENST00000529487,ENST00000528678,ENST00000530011,ENST00000471314,ENST00000527182,ENST00000483504,ENST00000526038,ENST00000534189,ENST00000530551,ENST00000487976	NM_020893	C9orf174	0.00764153	1	1	2	8.33e-06	TRUE
ENST00000331573,ENST00000481921,ENST00000411828,ENST00000380900,ENST00000431628	NM_001012543,NM_001169084,NM_003720,NM_203433,NM_001076347,NM_001171289,NM_001244457,NM_001261824,NR_049728	PSMG1	0.00805501	1	1	2	2.23e-25	TRUE
ENST00000370468,ENST00000290291,ENST00000370461,ENST00000450048	NM_007346,NM_001077019	OGFR	0.00806943	1	1	2	4.39e-12	TRUE
ENST00000368494	NM_001194492,NM_138459,NM_001180253,NM_001245104,NM_001255968	NUS1	0.00806943	2	2	2	7.62e-29	TRUE
ENST00000350792,ENST00000298687,ENST00000397858,ENST00000360463,ENST00000397853,ENST00000553503,ENST00000555158,ENST00000554104,ENST00000557633,ENST00000556716,ENST00000397855,ENST00000397856,ENST00000397847,ENST00000397851,ENST00000554143,ENST00000557353,ENST00000556147,ENST00000298684,ENST00000555650,ENST00000397844,ENST00000403829,ENST00000553593,ENST00000553793,ENST00000556008,ENST00000557416…	NM_001195153,NM_001134106,NM_201536,NM_201538,NM_201541,NM_201535,NM_016250,NM_201539,NM_201537,NM_201540,NM_001035304	NDRG2	0.00952273	1	1	2	4.11e-24	TRUE
ENST00000356956,ENST00000464636,ENST00000479434,ENST00000487607,ENST00000475834,ENST00000475584	NM_204970,NM_000876,NM_001122602,NM_174352,NM_001244473	IGF2R	1e-300	2	8	2	1	FALSE
ENST00000374864,ENST00000486883,ENST00000535650,ENST00000479215,ENST00000262650,ENST00000483727,ENST00000461661	NM_031483,NM_001082428,NM_001257137,NM_001257138	ITCH	1e-300	1	14	2	1	FALSE
ENST00000379350,ENST00000379348,ENST00000332995,ENST00000406205,ENST00000482982,ENST00000379345,ENST00000457702,ENST00000434977,ENST00000415087,ENST00000489548,ENST00000379335,ENST00000379329,ENST00000481706	NM_204446,NM_030948,NM_001192911,NM_001242648,NM_001260596	PHACTR1	1e-300	2	2	2	1	FALSE
ENST00000516868,ENST00000458922,ENST00000517283,ENST00000408493	NR_002989	SNORA81	1e-300	2	1	2	1	FALSE
ENST00000403766,ENST00000355700,ENST00000468067,ENST00000473091,ENST00000376440,ENST00000457666,ENST00000494576,ENST00000473194,ENST00000460562,ENST00000480738,ENST00000474510	NM_001006268,NM_001171176,NR_026644,NM_177967,NM_001144072,NM_001103344,NM_001246491	UBAC2	1e-300	2	12	2	1	FALSE
ENST00000516383,ENST00000384170,ENST00000362412,ENST00000384215,ENST00000365361	NR_002952	SNORA9	1e-300	2	3	2	1	FALSE
ENST00000306749,ENST00000584610,ENST00000580382,ENST00000579758,ENST00000578424,ENST00000579410	NM_205155,NM_004104,NM_001099930,NM_001012669	FASN	1e-300	2	7	2	1	FALSE
ENST00000601319,ENST00000513325,ENST00000598772,ENST00000597259,ENST00000402738,ENST00000431413,ENST00000422770,ENST00000407637,ENST00000426683,ENST00000452979,ENST00000264345,ENST00000543130,ENST00000470815,ENST00000504994,ENST00000512194	NM_001039298,NM_014606,NM_001083663,NM_001261366	HERC3	1e-300	1	3	2	1	FALSE
ENST00000335551,ENST00000602557,ENST00000520002,ENST00000602723,ENST00000400186,ENST00000542608,ENST00000537824,ENST00000519623,ENST00000523062,ENST00000520561,ENST00000523387,ENST00000539096,ENST00000523488,ENST00000520451,ENST00000521646,ENST00000520630,ENST00000524177,ENST00000519090,ENST00000518151	NM_033225	CSMD1	1e-300	1	4	2	1	FALSE
UNKNOWN	NR_024258	SNAR-E	1e-300	1	1	2	1	FALSE
ENST00000507866,ENST00000329016,ENST00000511199,ENST00000505529	NM_020777	SORCS2	1e-300	3	27	2	1	FALSE
ENST00000369550,ENST00000475423,ENST00000413910,ENST00000473552,ENST00000452771,ENST00000437719,ENST00000412124,ENST00000426673,ENST00000484317,ENST00000475966,ENST00000481062,ENST00000492372	NM_001031115,NM_001168809,NM_001142463,NM_001363,NM_001142668,NM_001105395,NM_001142513,NM_001260994	DKC1	1e-300	1	3	2	1	FALSE
ENST00000379083,ENST00000422236,ENST00000340010,ENST00000469651,ENST00000468551,ENST00000453332	NM_001199444,NM_000111,NM_001128071,NM_001130248,NM_001083676,NM_001184899,NM_001082098,NM_001242510	SLC26A3	1e-300	1	1	2	1	FALSE
ENST00000444368,ENST00000448507,ENST00000409757,ENST00000427736,ENST00000410031,ENST00000451522,ENST00000467966,ENST00000446947,ENST00000439515	NM_001132117,NM_001113363,NM_020773,NM_001113361,NM_001099176,NM_001252314	TBC1D14	1e-300	1	10	2	1	FALSE
ENST00000349051,ENST00000357321,ENST00000488223,ENST00000469925,ENST00000537969,ENST00000544879,ENST00000372997	NM_001131883,NM_015901,NM_001045905	NUDT13	1e-300	0	5	1	1	FALSE
ENST00000517138	NR_002997	SCARNA1	1e-300	0	1	1	1	FALSE
UNKNOWN	NR_035604,NR_031650,NR_032967	MIR1248	1e-300	2	1	2	1	FALSE
ENST00000261483,ENST00000502261,ENST00000508043,ENST00000513921,ENST00000505313,ENST00000503970	NM_002372,NM_001205886	MAN2A1	1e-300	2	15	2	1	FALSE
ENST00000539486,ENST00000325954,ENST00000542438,ENST00000538796,ENST00000413266,ENST00000551139,ENST00000536869,ENST00000537997,ENST00000543578,ENST00000535417,ENST00000542207,ENST00000541955,ENST00000543675,ENST00000537740,ENST00000537376,ENST00000546262,ENST00000544124,ENST00000540046,ENST00000545419,ENST00000535395,ENST00000366112,ENST00000535470,ENST00000538254,ENST00000543757,ENST00000542701…	NM_014868,NM_001076869,NM_001260820	RNF10	1e-300	1	6	2	1	FALSE
ENST00000541565,ENST00000413764,ENST00000391905,ENST00000537898,ENST00000545154,ENST00000545781,ENST00000308852,ENST00000261458,ENST00000367010,ENST00000426968,ENST00000367009	NM_018194,NM_001170580,NM_001170564,NM_001170588,NM_001122834,NM_001170587	HHAT	1e-300	2	4	2	1	FALSE
ENST00000441007,ENST00000445596,ENST00000323963,ENST00000426808,ENST00000465222,ENST00000491473,ENST00000486805,ENST00000465032,ENST00000465267,ENST00000495049,ENST00000429589,ENST00000425053,ENST00000440191,ENST00000485101,ENST00000475653,ENST00000443963,ENST00000356531,ENST00000498746,ENST00000467585,ENST00000466362,ENST00000468362,ENST00000492144,ENST00000465792,ENST00000475409,ENST00000497177…	NM_204549,NM_001195661,NM_001133407,NM_001967,NM_001100195,NM_001034044,NM_001246518	EIF4A2	1e-300	6	11	2	0.0239732	FALSE
ENST00000578968,ENST00000577700,ENST00000585030,ENST00000579383,ENST00000580458,ENST00000438705,ENST00000584327,ENST00000582727,ENST00000584686,ENST00000580528	NR_003697	SNHG15	1e-300	2	3	2	1	FALSE
ENST00000403263,ENST00000424117,ENST00000414320	NM_017759,NM_001205940	INO80D	1e-300	2	4	2	1	FALSE
ENST00000413221,ENST00000427306,ENST00000442823,ENST00000508590	NR_015370	EPB41L4A-AS1	1e-300	1	3	2	0.0114252	FALSE
ENST00000261622,ENST00000565644,ENST00000563489	NM_001030579,NM_003486,NM_174613,NM_001082120	SLC7A5	1e-300	85	81	2	1	FALSE
ENST00000329276,ENST00000494697,ENST00000470143,ENST00000469588,ENST00000445139,ENST00000460258,ENST00000496775,ENST00000480992,ENST00000484998,ENST00000467196,ENST00000415272,ENST00000492135,ENST00000466447,ENST00000480447,ENST00000490753,ENST00000471023,ENST00000462630,ENST00000467857	NM_001031388,NM_001132344,NR_027700,NM_006392,NM_001033622,NM_001182084,NM_104489,NM_001244305,NM_001244674	NOP56	1e-300	2	5	2	1	FALSE
ENST00000361255,ENST00000449912,ENST00000376871,ENST00000376872,ENST00000451710,ENST00000360774,ENST00000376864,ENST00000483186,ENST00000359047	NM_017662,NM_001177310,NM_001177311	TRPM6	1e-300	1	1	2	1	FALSE
ENST00000369144,ENST00000478852,ENST00000541549,ENST00000462527	NM_117213,NM_003750,NM_001206314	EIF3A	1e-300	1	8	2	0.0157142	FALSE
ENST00000384295,ENST00000384151,ENST00000384171,ENST00000384234,ENST00000384696,ENST00000384418,ENST00000364993,ENST00000384442,ENST00000364646,ENST00000384448,ENST00000363243,ENST00000364595,ENST00000384126	NR_002981	SNORA51	1e-300	1	2	2	1	FALSE
ENST00000384737,ENST00000410656,ENST00000516013,ENST00000516165	NR_002917	SNORA19	1e-300	1	3	2	1	FALSE
ENST00000458790	NR_002922	SNORA13	1e-300	1	3	2	1	FALSE
ENST00000384221	NR_002969	SNORA36A	1e-300	1	1	2	1	FALSE
ENST00000447870,ENST00000477564,ENST00000534080,ENST00000416156,ENST00000340239,ENST00000327678,ENST00000527167,ENST00000407614,ENST00000335879,ENST00000472589	NM_014509	SERHL2	1e-300	4	7	2	1	FALSE
ENST00000342183,ENST00000378262,ENST00000412315,ENST00000484192,ENST00000406316,ENST00000404971,ENST00000401710,ENST00000401669,ENST00000405472,ENST00000406859,ENST00000402717,ENST00000331040,ENST00000474354,ENST00000462791,ENST00000495871,ENST00000405581,ENST00000496792	NM_001198975,NM_001198976,NM_001135659,NM_004801,NM_138735,NM_001109805,NM_174404	NRXN1	4.66e-14	1	1	2	1	FALSE
ENST00000286355,ENST00000377928,ENST00000522949	NM_001115,NM_001192841	ADCY8	4.66e-14	1	1	2	1	FALSE
ENST00000359867,ENST00000396832,ENST00000400206,ENST00000366216,ENST00000431632,ENST00000495232,ENST00000403904,ENST00000431611,ENST00000494610,ENST00000413574,ENST00000405675,ENST00000498529,ENST00000442216,ENST00000451964,ENST00000467976,ENST00000430335	NM_204377,NM_001894,NM_152221,NM_001078109,NM_001261652	CSNK1E	4.66e-14	6	21	2	0.0138536	FALSE
ENST00000570049,ENST00000566392,ENST00000562841,ENST00000569333,ENST00000304372,ENST00000562860,ENST00000568736,ENST00000562721,ENST00000567976,ENST00000561625,ENST00000566295	NM_001100915,NM_001105392	KCTD19	4.66e-14	1	1	2	1	FALSE
ENST00000518164,ENST00000521534,ENST00000287038,ENST00000518850,ENST00000396070,ENST00000521291,ENST00000523172,ENST00000521726,ENST00000517489,ENST00000517805,ENST00000522156,ENST00000520998,ENST00000521112	NM_001007967,NM_000989,NM_001190178,NM_001034434,NM_001180895	RPL30	4.66e-14	2	2	2	1	FALSE
ENST00000481437,ENST00000451562,ENST00000468812,ENST00000489459,ENST00000355968,ENST00000479021,ENST00000415933,ENST00000494484,ENST00000480603	NM_001166326,NM_001032809,NM_001112655,NM_001132588,NM_021130,NM_001009370,NM_214353,NM_178320,NM_001082057,NM_001245462	PPIA	4.66e-14	8	11	2	1	FALSE
ENST00000420027,ENST00000371677,ENST00000415862,ENST00000340309,ENST00000371674,ENST00000396059,ENST00000371657,ENST00000483534,ENST00000492371,ENST00000486653,ENST00000490555,ENST00000493090,ENST00000467839,ENST00000472923,ENST00000432266,ENST00000470565,ENST00000490289,ENST00000462217,ENST00000461960,ENST00000473860,ENST00000468926	NM_021988,NM_022442,NM_199144,NM_001032288,NM_001035497,NM_001135478,NM_001205077,NM_001205084,NM_001205089,NM_001205091,NM_001205096,NM_001205097,NM_001205094,NM_001205107,NM_001257393,NM_001257394,NM_001257395,NM_001257396,NM_001257397,NM_001257398,NM_001257399,NR_047553,NR_047554,NR_047555,NR_047556	UBE2V1	4.66e-14	1	7	2	0.0193809	FALSE
ENST00000263097,ENST00000562015,ENST00000348419,ENST00000565096,ENST00000562958,ENST00000569352,ENST00000562075,ENST00000566695,ENST00000568865,ENST00000564572	NM_001142256,NM_001131129,NM_004368,NM_201277,NM_001035420	CNN2	4.66e-14	5	4	2	0.0203405	FALSE
ENST00000489418,ENST00000429429,ENST00000318386,ENST00000483348,ENST00000488267,ENST00000480936	NM_214666,NM_001004403,NM_006527,NM_001045880,NM_001244857,NM_001246472	SLBP	4.66e-14	4	3	2	1	FALSE
ENST00000365074,ENST00000365028,ENST00000384520,ENST00000384174,ENST00000384356,ENST00000363485,ENST00000384339,ENST00000516349	NR_002581	SNORA72	4.66e-14	1	2	2	1	FALSE
ENST00000228740,ENST00000552789,ENST00000537111,ENST00000553041,ENST00000413268,ENST00000548852,ENST00000547393,ENST00000548375,ENST00000547982,ENST00000552091	NM_001006234,NM_001131330,NM_000895,NM_001185132,NM_001034280,NM_001256644,NM_001256643	LTA4H	4.66e-14	1	2	2	1	FALSE
ENST00000378463,ENST00000413905,ENST00000378455,ENST00000397354,ENST00000342274,ENST00000378444,ENST00000442018,ENST00000427012,ENST00000406200,ENST00000490976,ENST00000412952	NM_001123383,NM_001123384,NM_017745,NM_001123385,NM_001191544	BCOR	4.66e-14	21	48	2	1	FALSE
ENST00000381312,ENST00000381310,ENST00000474762,ENST00000490172,ENST00000381305,ENST00000477140,ENST00000469464	NM_018702,NM_001192588	ADARB2	4.66e-14	582	693	2	1	FALSE
ENST00000584177,ENST00000487066,ENST00000580180,ENST00000475947,ENST00000481898,ENST00000497774,ENST00000582911,ENST00000580770,ENST00000581718,ENST00000581361,ENST00000584926,ENST00000584141,ENST00000579473,ENST00000492250,ENST00000578757,ENST00000475953,ENST00000578380,ENST00000470491,ENST00000581913,ENST00000583400,ENST00000481027,ENST00000477249,ENST00000483588,ENST00000472367,ENST00000478103…	NR_027158,NR_027159,NR_027160,NR_027161,NR_027162,NR_027163,NR_027164,NR_027165,NR_027166,NR_027167,NR_027168,NR_027169,NR_027170,NR_027171,NR_027172,NR_027173,NR_027174,NR_027175,NR_027176,NR_027177,NR_027178,NR_027179,NR_027667,NR_045021,NR_045022,NR_045023,NR_045024,NR_045025,NR_045026,NR_045027,NR_045028,NR_045029	C17orf76-AS1	4.66e-14	4	11	2	1	FALSE
ENST00000437600,ENST00000497815,ENST00000292538,ENST00000393824,ENST00000547394,ENST00000360264,ENST00000425244,ENST00000292535,ENST00000556210,ENST00000546411,ENST00000550008,ENST00000549414,ENST00000558469,ENST00000560541,ENST00000558836,ENST00000465461,ENST00000485792,ENST00000487284	NM_001131232,NM_001135473,NM_181552,NM_181500,NM_001202546,NM_001202543,NM_001202544,NM_001913,NM_001202545	CUX1	4.66e-14	173	286	2	1	FALSE
ENST00000341698	NM_199203	TMEM189-UBE2V1	4.66e-14	2	19	2	1	FALSE
ENST00000391079,ENST00000390889,ENST00000390927,ENST00000390962,ENST00000459126	NR_003054	SNORD65	4.66e-14	1	1	2	1	FALSE
ENST00000384176,ENST00000384401,ENST00000384096	NR_002963	SNORA24	4.66e-14	3	2	2	1	FALSE
ENST00000427076,ENST00000454572,ENST00000422304,ENST00000326391,ENST00000418424	NR_003655	POLR2J4	4.66e-14	53	41	2	1	FALSE
ENST00000372409,ENST00000479348	NM_001133358,NM_022104,NM_001103099	PCIF1	4.66e-14	1	2	2	1	FALSE
ENST00000264052,ENST00000427101,ENST00000432979,ENST00000409824,ENST00000409341,ENST00000341950,ENST00000340126,ENST00000409112,ENST00000409897,ENST00000470940,ENST00000466710,ENST00000413284,ENST00000452345,ENST00000462751,ENST00000494508,ENST00000492546,ENST00000459786,ENST00000431952,ENST00000494901,ENST00000488180	NM_001172589,NM_001131333,NM_003113,NM_001080391,NM_001206701,NM_001206702,NM_001206703,NM_001206704	SP100	4.66e-14	1	4	2	1	FALSE
ENST00000513200,ENST00000427991,ENST00000504117,ENST00000312498,ENST00000329378	NM_001145678,NM_173665	KIAA0825	4.66e-14	3	14	2	1	FALSE
ENST00000444465,ENST00000455853,ENST00000581850,ENST00000584179,ENST00000584911	NR_026860,NR_026861	LINC00473	4.66e-14	68	110	2	0.0338099	FALSE
ENST00000411630,ENST00000441504,ENST00000425653,ENST00000444958	NR_024031	DANCR	4.66e-14	3	5	2	1	FALSE
ENST00000254908,ENST00000512783,ENST00000504352,ENST00000510013	NM_204203,NM_032151	PCBD2	4.66e-14	37	37	2	1	FALSE
ENST00000435030,ENST00000414838,ENST00000450621,ENST00000464066,ENST00000397413,ENST00000460377,ENST00000482151	NM_004522,NM_001076127	KIF5C	4.66e-14	2	1	2	1	FALSE
ENST00000419505,ENST00000484567,ENST00000518793,ENST00000301015,ENST00000327397,ENST00000521877,ENST00000451779,ENST00000472168,ENST00000495568,ENST00000466823,ENST00000497793,ENST00000566414,ENST00000474606,ENST00000475586,ENST00000491917,ENST00000490756	NM_001142864	PIEZO1	4.66e-14	47	64	2	1	FALSE
ENST00000365645	NR_026705	VTRNA1-3	4.66e-14	1	1	2	1	FALSE
ENST00000408749	NR_023344	RNU6ATAC	4.66e-14	3	1	2	1	FALSE
ENST00000378781,ENST00000429979,ENST00000378797,ENST00000389908,ENST00000378787,ENST00000441284,ENST00000378784,ENST00000487195,ENST00000409879,ENST00000322896,ENST00000534925,ENST00000417405,ENST00000439642,ENST00000480935	NM_025113,NM_001102041	KIAA0226L	4.66e-14	2	1	2	1	FALSE
UNKNOWN	NR_033898	LOC285577	4.66e-14	1	1	2	1	FALSE
ENST00000518043,ENST00000417946,ENST00000523702,ENST00000430249,ENST00000233072,ENST00000497163,ENST00000451903,ENST00000467353,ENST00000497121,ENST00000470791,ENST00000479988	NM_001045841,NM_001122633,NM_001122634,NM_001875,NM_001192258,NM_001181605	CPS1	4.66e-14	31	59	2	1	FALSE
ENST00000589123,ENST00000346156,ENST00000395111,ENST00000586919,ENST00000341919,ENST00000590282,ENST00000443272,ENST00000588839,ENST00000589537,ENST00000589164,ENST00000589969	NM_205271,NM_005597,NM_205843,NM_001024574,NM_001245002,NM_001245004,NM_001245005	NFIC	4.66e-14	8	38	2	1	FALSE
ENST00000302118,ENST00000452118,ENST00000543384,ENST00000490692	NM_001112660,NM_001111122,NM_174936,NM_001267753	PCSK9	4.67e-14	33	16	2	0.0491678	FALSE
ENST00000372159,ENST00000372155,ENST00000372153,ENST00000438527,ENST00000310532,ENST00000480876,ENST00000544003,ENST00000482620	NM_022779,NM_138620,NM_001101886	DDX31	4.68e-14	2	5	2	1	FALSE
ENST00000589070,ENST00000427177,ENST00000591833,ENST00000591198,ENST00000590576,ENST00000431235,ENST00000449803,ENST00000587237,ENST00000590294,ENST00000329047,ENST00000588575,ENST00000590595,ENST00000591934,ENST00000588690,ENST00000592098,ENST00000423034,ENST00000590059,ENST00000587514,ENST00000590586,ENST00000592407,ENST00000427674,ENST00000589140,ENST00000590825,ENST00000586812,ENST00000592420…	NM_001030701,NM_006640,NM_001113492,NM_001113495,NM_001113493,NM_001113496,NM_001113491,NM_001113494	SEPT9	4.74e-14	26	90	2	1	FALSE
ENST00000340243,ENST00000374277,ENST00000449464,ENST00000538825	NM_001630	ANXA8L2	5.69e-14	22	24	2	1	FALSE
ENST00000516236,ENST00000364957,ENST00000365413,ENST00000363664	NR_002436	SNORA33	6.17e-14	1	2	2	1	FALSE
ENST00000230050,ENST00000484616	NM_001195665,NM_001016,NM_214363,NM_001014387,NM_001183789,NM_001252509	RPS12	6.17e-14	3	5	2	1	FALSE
ENST00000361198,ENST00000425280,ENST00000461873,ENST00000490751	NM_205070,NM_003893,NM_001113407,NM_001266417	LDB1	6.17e-14	2	7	2	0.0391656	FALSE
ENST00000301740,ENST00000576924,ENST00000575009,ENST00000576894,ENST00000575701,ENST00000576415,ENST00000571378,ENST00000574340,ENST00000570971,ENST00000575870,ENST00000573451,ENST00000571372,ENST00000570655,ENST00000573498,ENST00000572278,ENST00000576076,ENST00000572952,ENST00000576674,ENST00000574593,ENST00000572883,ENST00000572721,ENST00000573311,ENST00000571041,ENST00000570705,ENST00000576878…	NM_016333,NM_001244545	SRRM2	7.84e-14	10	15	2	1	FALSE
ENST00000516672	NR_003002	SCARNA13	9.16e-14	1	2	2	1	FALSE
ENST00000500370,ENST00000554169,ENST00000553559,ENST00000555866	NR_003138,NR_001459	SNHG10	9.16e-14	1	4	2	1	FALSE
ENST00000492698,ENST00000370691,ENST00000252999,ENST00000495695,ENST00000462415,ENST00000491036,ENST00000468786,ENST00000471042,ENST00000481120,ENST00000464134,ENST00000497363,ENST00000474128,ENST00000370692,ENST00000370677,ENST00000497053	NM_005560	LAMA5	9.16e-14	60	91	2	1	FALSE
ENST00000313949,ENST00000371075,ENST00000371098,ENST00000453292,ENST00000419558,ENST00000491348,ENST00000472183,ENST00000482112,ENST00000462499,ENST00000490374,ENST00000493744,ENST00000467227,ENST00000464624,ENST00000371102,ENST00000371100,ENST00000371099,ENST00000306120,ENST00000481768,ENST00000450130,ENST00000349036,ENST00000423897,ENST00000464960,ENST00000488546,ENST00000481039,ENST00000468895…	NM_000516,NM_080426,NM_080425,NM_016592,NM_001077490,NM_001077489,NM_001077488,NR_003259,NM_001003263,NR_033291,NR_033292,NM_001171983,NM_001171985,NM_214312,NM_001130215,NM_001171984,NM_181021	GNAS	1.39e-13	37	37	2	1	FALSE
ENST00000339464,ENST00000410089,ENST00000409496,ENST00000410058,ENST00000428540	NM_001171593,NM_001037274,NM_058238	WNT7B	1.39e-13	14	41	2	1	FALSE
ENST00000295955,ENST00000503277,ENST00000508595,ENST00000449470,ENST00000511643,ENST00000506581,ENST00000514842,ENST00000503040,ENST00000504470,ENST00000511075,ENST00000437992	NM_001193558,NM_001132412,NM_001024921,NM_000661,NM_001024469,NM_114358,NM_001243481,NM_001257333	RPL9	1.39e-13	2	2	2	1	FALSE
ENST00000359568,ENST00000490468,ENST00000480896,ENST00000466474,ENST00000483844,ENST00000482575,ENST00000418394,ENST00000465356	NM_006031	PCNT	4.11e-13	1	7	2	1	FALSE
ENST00000371817,ENST00000464187,ENST00000469093,ENST00000463925,ENST00000460264,ENST00000371820,ENST00000465877	NM_204790,NM_000093,NM_001014971	COL5A1	4.11e-13	15	50	2	1	FALSE
ENST00000414282,ENST00000416970,ENST00000436596,ENST00000447221	NR_003672,NR_024542,NR_024543	SNHG7	7.63e-13	2	8	2	1	FALSE
ENST00000391287,ENST00000391159,ENST00000391185	NR_002958	SNORA17	7.63e-13	1	3	2	1	FALSE
ENST00000371873,ENST00000371871,ENST00000471289,ENST00000450808,ENST00000371870	NM_001031564,NM_001193618,NM_016308,NM_001136140,NM_001046044,NR_046394,NR_046395	CMPK1	1.04e-12	1	4	2	0.0478409	FALSE
ENST00000513024,ENST00000509638,ENST00000512946,ENST00000508501,ENST00000313860,ENST00000512632,ENST00000512228,ENST00000514190,ENST00000512820,ENST00000511424,ENST00000446625,ENST00000515847,ENST00000503057,ENST00000511496,ENST00000514096,ENST00000509277,ENST00000381753,ENST00000396595,ENST00000509454,ENST00000508466,ENST00000515785,ENST00000505705	NM_001112718,NM_014988,NM_001112719,NM_001112717,NM_001112720,NM_001191521	LIMCH1	1.04e-12	21	91	2	1	FALSE
ENST00000602920,ENST00000602294,ENST00000602938,ENST00000602737,ENST00000602772,ENST00000414209,ENST00000602895,ENST00000602546,ENST00000453317,ENST00000602985,ENST00000415215,ENST00000538519	NR_024582	JPX	1.04e-12	3	10	2	1	FALSE
ENST00000205061,ENST00000422840,ENST00000447066,ENST00000562090,ENST00000567951,ENST00000561942,ENST00000561481,ENST00000563646,ENST00000563432,ENST00000566601,ENST00000567911,ENST00000565474,ENST00000565260	NM_205496,NR_027264,NR_027265,NM_012201,NM_001145666,NM_001145667,NM_001179848,NM_001244140	GLG1	1.44e-12	1	5	2	1	FALSE
UNKNOWN	NR_027001	LOC388152	1.44e-12	27	55	2	0.0145509	FALSE
ENST00000394333,ENST00000394332,ENST00000479035,ENST00000584912,ENST00000245857,ENST00000584583,ENST00000577407,ENST00000470646,ENST00000378096,ENST00000577760,ENST00000584056	NM_001131307,NM_000978,NM_001003100,NM_001129955,NM_001035014,NM_001266209	RPL23	1.44e-12	1	9	2	1	FALSE
ENST00000398081,ENST00000468090,ENST00000291565,ENST00000398085,ENST00000476084,ENST00000470029,ENST00000498040,ENST00000327574,ENST00000472777,ENST00000476313,ENST00000481512,ENST00000490666,ENST00000467908,ENST00000343528,ENST00000398078,ENST00000468392,ENST00000461123	NM_003681,NM_213943,NM_001075651,NM_001009220	PDXK	1.99e-12	23	35	2	1	FALSE
ENST00000378741,ENST00000308647,ENST00000472194,ENST00000378736,ENST00000485748,ENST00000474481	NM_031921	ATAD3B	3.81e-12	2	10	2	1	FALSE
ENST00000368346,ENST00000392403,ENST00000478837,ENST00000548566,ENST00000492987,ENST00000477427,ENST00000548830	NM_001133844,NM_018489,NM_001192743	ASH1L	5.28e-12	1	7	2	1	FALSE
ENST00000516882,ENST00000516330,ENST00000516215,ENST00000516505,ENST00000516796,ENST00000459004	NR_003139	SCARNA18	6.15e-12	0	1	1	1	FALSE
ENST00000326764,ENST00000439657,ENST00000376514,ENST00000376526,ENST00000436479,ENST00000443957,ENST00000431846,ENST00000462541,ENST00000421200	NM_052925,NM_001102100,NM_001171396	LENG8	7.33e-12	8	16	2	1	FALSE
ENST00000512953,ENST00000398450,ENST00000511106	NM_001171844,NM_001040129	SPINK13	1.02e-11	10	15	2	1	FALSE
ENST00000429711,ENST00000396957,ENST00000273223,ENST00000435983,ENST00000396953,ENST00000457131,ENST00000452606,ENST00000434963	NM_001193573,NM_000994,NM_001007073,NM_001007074,NM_001001636,NM_001034783,NM_001171505,NM_001178332,NM_001252169,NM_001252255	RPL32	1.02e-11	3	11	2	1	FALSE
ENST00000321949,ENST00000338797,ENST00000594658,ENST00000601916	NM_015321,NM_001098482,NM_001206319	CRTC1	1.41e-11	8	17	2	1	FALSE
ENST00000268035,ENST00000558762,ENST00000559925,ENST00000558355,ENST00000557938,ENST00000560186,ENST00000560277,ENST00000557873,ENST00000558898,ENST00000560432,ENST00000558947,ENST00000559582,ENST00000560144,ENST00000561049,ENST00000560343,ENST00000560972,ENST00000558751	NM_205032,NM_001131787,NM_000875,NM_214172,NM_001244612,NM_001261352	IGF1R	1.41e-11	89	239	2	1	FALSE
ENST00000292205,ENST00000368471,ENST00000368474,ENST00000492630,ENST00000529168,ENST00000530954,ENST00000534279,ENST00000463920,ENST00000494866,ENST00000471068,ENST00000526905	NM_001111,NM_015840,NM_015841,NM_001025107,NM_001193495	ADAR	1.96e-11	2	7	2	1	FALSE
ENST00000419152,ENST00000532400,ENST00000317198,ENST00000423316,ENST00000529272,ENST00000395119,ENST00000533833,ENST00000528610,ENST00000442189,ENST00000526838,ENST00000532741,ENST00000527741,ENST00000530109,ENST00000529576,ENST00000531621,ENST00000529007,ENST00000524624,ENST00000524397,ENST00000534380,ENST00000528382,ENST00000534377,ENST00000526786,ENST00000530191,ENST00000533204,ENST00000530616…	NM_001960,NM_001130057,NM_001130053,NM_001130056,NM_032378,NM_001130055,NM_001195203,NM_001206620	EEF1D	2.63e-11	30	29	2	1	FALSE
ENST00000254508,ENST00000485755,ENST00000479519,ENST00000420141	NM_024923,NM_001191461	NUP210	2.72e-11	5	27	2	1	FALSE
ENST00000551697,ENST00000380189,ENST00000547787,ENST00000551005,ENST00000317551,ENST00000546406,ENST00000550919,ENST00000553122,ENST00000550079,ENST00000422340,ENST00000551757,ENST00000548942,ENST00000550547,ENST00000438450,ENST00000547138,ENST00000546676,ENST00000542320,ENST00000547800,ENST00000549089,ENST00000548930,ENST00000551384,ENST00000549389,ENST00000550258,ENST00000547455,ENST00000546514…	NM_147190,NM_001102132	CERS5	5.26e-11	2	6	2	1	FALSE
ENST00000389395,ENST00000398558,ENST00000585788,ENST00000589157,ENST00000355415,ENST00000588918,ENST00000589063,ENST00000589995,ENST00000585814,ENST00000592652,ENST00000591878,ENST00000588626,ENST00000586402	NM_021731,NM_001042680,NM_174983	MFSD12	7.33e-11	56	49	2	1	FALSE
ENST00000558518,ENST00000557933,ENST00000545707,ENST00000535915,ENST00000455727,ENST00000557958,ENST00000560502,ENST00000558013,ENST00000561343,ENST00000252444,ENST00000560467,ENST00000558528,ENST00000560173,ENST00000559340,ENST00000560628	NM_001032906,NM_000527,NM_001195798,NM_001195799,NM_001195800,NM_001195802,NM_001195803,NM_001166530,NM_204452,NM_001206354	LDLR	7.33e-11	2	6	2	1	FALSE
ENST00000234111,ENST00000405333,ENST00000446285,ENST00000443218	NM_001167766,NM_001198686,NM_002539,NM_174130,NM_001183948	ODC1	9.63e-11	0	2	1	1	FALSE
ENST00000383906	NR_028374	SNORA80B	9.63e-11	0	2	1	1	FALSE
ENST00000304381,ENST00000569532,ENST00000568469,ENST00000421369,ENST00000561963	NM_001030641,NM_001160364,NM_024847,NM_001257826	TMC7	1.02e-10	21	13	2	1	FALSE
ENST00000602385,ENST00000363312	NR_001594,NR_033817,NR_033816,NR_001566,NR_001576	TERC	1.03e-10	2	3	2	1	FALSE
ENST00000482518,ENST00000392054,ENST00000409462,ENST00000392055,ENST00000354069,ENST00000534952	NM_001178144,NM_017933,NM_001100818,NM_001173520,NM_001079584,NM_001265883	PID1	1.26e-10	1	1	2	0.0163015	FALSE
ENST00000261623,ENST00000565588,ENST00000566534,ENST00000566229,ENST00000567174,ENST00000569359,ENST00000563526,ENST00000568278,ENST00000562209,ENST00000561972	NM_000101,NM_001100290,NM_214267,NM_174034,NM_001082099	CYBA	1.96e-10	1	4	2	1	FALSE
ENST00000537098,ENST00000539778,ENST00000566513,ENST00000565029,ENST00000398040,ENST00000564666,ENST00000566462,ENST00000565680,ENST00000569146,ENST00000568590,ENST00000561605	NM_198390,NM_030629	CMIP	1.96e-10	59	140	2	1	FALSE
ENST00000354588,ENST00000524958,ENST00000532786,ENST00000431002,ENST00000532208,ENST00000525675,ENST00000415855,ENST00000527679,ENST00000524759,ENST00000528115,ENST00000528862,ENST00000377954,ENST00000526490	NM_024099	C11orf48	2.51e-10	1	9	2	1	FALSE
ENST00000411095,ENST00000383870,ENST00000391265,ENST00000391227	NR_004390	SNORA57	2.51e-10	0	4	1	1.96e-45	FALSE
ENST00000532971,ENST00000398922,ENST00000529868,ENST00000594728	NM_001194712,NM_001131805,NM_001043229,NM_001192320,NM_001243949	METTL12	2.51e-10	0	7	1	1.19e-27	FALSE
ENST00000569188,ENST00000568321,ENST00000219322,ENST00000566118,ENST00000306560	NM_001110777,NM_005329,NM_138612,NM_001199280,NM_001001268,NM_001192867,NM_001082709	HAS3	2.73e-10	1	0	1	7.94e-13	FALSE
ENST00000470729,ENST00000465868,ENST00000409867,ENST00000481691,ENST00000295181,ENST00000471048	NR_027020,NR_027019	ANKRD30BL	3.08e-10	8	10	2	1	FALSE
ENST00000358951,ENST00000483278,ENST00000491005,ENST00000474966,ENST00000491305,ENST00000478976,ENST00000237724,ENST00000484658,ENST00000474178,ENST00000475769,ENST00000462353	NM_001163800,NM_012414,NM_001192199,NM_001163799	RAB3GAP2	3.31e-10	1	10	2	1	FALSE
ENST00000395957,ENST00000395958,ENST00000457309,ENST00000395956,ENST00000353245,ENST00000523848,ENST00000521309,ENST00000522542,ENST00000522819,ENST00000395953,ENST00000395948,ENST00000395951,ENST00000419477,ENST00000521607,ENST00000480304,ENST00000518736,ENST00000517727,ENST00000521328,ENST00000418997,ENST00000437293,ENST00000523131,ENST00000523938,ENST00000492736	NM_001031343,NM_001133140,NM_145690,NM_001135701,NM_001135699,NM_001135702,NM_003406,NM_001135700,NM_174814,NM_001260899,NM_001267887	YWHAZ	3.78e-10	3	15	2	1	FALSE
ENST00000066544,ENST00000531206,ENST00000570740,ENST00000446365,ENST00000533415,ENST00000571643,ENST00000527547,ENST00000526866,ENST00000573502,ENST00000525495,ENST00000574304,ENST00000575830,ENST00000576484,ENST00000573550,ENST00000570818,ENST00000575483,ENST00000532893,ENST00000528748,ENST00000532575,ENST00000528147	NM_001006331,NM_001256,NM_001114091,NM_001105428,NM_001178324	CDC27	5.03e-10	6	14	2	1	FALSE
ENST00000359232,ENST00000554912,ENST00000539621,ENST00000392908,ENST00000556505,ENST00000555927,ENST00000554224,ENST00000556715,ENST00000554291,ENST00000554060,ENST00000556868,ENST00000555949,ENST00000555475,ENST00000553359,ENST00000556873,ENST00000553574,ENST00000555051,ENST00000557438,ENST00000555888,ENST00000556201,ENST00000556844	NM_001039355,NM_001077871	SLC25A29	5.23e-10	5	10	2	1	FALSE
ENST00000516903	NR_004388	SCARNA14	5.87e-10	0	1	1	1	FALSE
ENST00000261881,ENST00000367709,ENST00000566524,ENST00000562124,ENST00000568216,ENST00000570251,ENST00000561773	NM_001012690,NM_017858,NM_001105336	TIPIN	5.87e-10	0	1	1	1	FALSE
ENST00000399537,ENST00000430969,ENST00000328270,ENST00000464852,ENST00000455076,ENST00000497663,ENST00000440081,ENST00000413081,ENST00000434361,ENST00000399434	NM_001080495	TNRC18	7.47e-10	22	34	2	1	FALSE
ENST00000371421,ENST00000483563,ENST00000431925,ENST00000461627,ENST00000419386,ENST00000466367,ENST00000495220,ENST00000471125,ENST00000491911,ENST00000497877,ENST00000468983,ENST00000475658	NM_001031475,NM_152285,NM_001080365	ARRDC1	1.01e-09	4	4	2	1	FALSE
ENST00000363046	NR_003051,NR_036646	RMRP	1.33e-09	2	2	2	1	FALSE
ENST00000430131,ENST00000377560,ENST00000550722,ENST00000549306,ENST00000549141,ENST00000547085,ENST00000548140,ENST00000548588,ENST00000548896,ENST00000550968,ENST00000552437,ENST00000547519,ENST00000311694,ENST00000547352,ENST00000550724	NM_001109662	HECTD4	1.72e-09	2	11	2	1	FALSE
ENST00000479214,ENST00000366504,ENST00000491337,ENST00000487338,ENST00000498046,ENST00000339986	NM_020394,NM_001204221,NR_037892	ZNF695	1.93e-09	2	4	2	1	FALSE
UNKNOWN	NR_037894	ZNF670-ZNF695	1.93e-09	2	4	2	1	FALSE
ENST00000393239,ENST00000324093,ENST00000504524,ENST00000504689,ENST00000501038,ENST00000512744,ENST00000506979,ENST00000508630,ENST00000512807,ENST00000504979,ENST00000503166,ENST00000514990,ENST00000504767,ENST00000511018,ENST00000515191,ENST00000505505,ENST00000505665,ENST00000505237	NM_015103	PLXND1	1.93e-09	2	7	2	1	FALSE
ENST00000405995,ENST00000357304,ENST00000458550,ENST00000489593,ENST00000372249,ENST00000422467,ENST00000456307,ENST00000451855,ENST00000320547,ENST00000465931	NM_013318	PRRC2B	1.93e-09	3	13	2	1	FALSE
ENST00000355300,ENST00000561030,ENST00000557798,ENST00000561686,ENST00000567726,ENST00000566711,ENST00000559893,ENST00000564472,ENST00000570216,ENST00000562933,ENST00000563316,ENST00000567605,ENST00000568951,ENST00000564066	NM_001024577,NM_001131578,NM_032808	LINGO1	1.93e-09	1	1	2	1	FALSE
ENST00000284224,ENST00000581714,ENST00000580774	NM_031422,NM_001075879,NM_001256316,NM_001261472	CHST9	2.66e-09	1	0	1	1	FALSE
ENST00000222247,ENST00000600147,ENST00000599898,ENST00000602216,ENST00000597648,ENST00000599870,ENST00000600238	NM_000980,NM_001033619,NM_001183374,NM_001252032	RPL18A	2.66e-09	4	3	2	1	FALSE
ENST00000582605,ENST00000579964,ENST00000578701,ENST00000568797	NR_026908	AQP4-AS1	2.66e-09	1	0	1	6.34e-05	FALSE
ENST00000458591,ENST00000555259,ENST00000463622,ENST00000544052,ENST00000556768,ENST00000484733,ENST00000421551,ENST00000557713,ENST00000311943,ENST00000541123,ENST00000557076,ENST00000553693,ENST00000396629,ENST00000556413,ENST00000554776,ENST00000556534,ENST00000469043,ENST00000554819,ENST00000553278,ENST00000555953,ENST00000554486,ENST00000554437,ENST00000556486,ENST00000556256,ENST00000555550…	NM_001199714,NM_182835,NM_016106,NM_001191365,NM_001257376,NR_047546,NR_047547,NR_047548,NM_001266523	SCFD1	2.66e-09	1	1	2	1	FALSE
ENST00000405858,ENST00000404360,ENST00000342651,ENST00000394917,ENST00000491565	NM_016265,NM_006956,NM_001110071	ZNF12	2.66e-09	1	3	2	1	FALSE
ENST00000515906,ENST00000391263,ENST00000384437,ENST00000364518,ENST00000516649,ENST00000364537	NR_000012	SNORA68	2.66e-09	3	2	2	1	FALSE
ENST00000264057,ENST00000427930,ENST00000447484,ENST00000489613,ENST00000409813,ENST00000472732,ENST00000490764,ENST00000474488,ENST00000430834,ENST00000480535,ENST00000465569,ENST00000471764,ENST00000495901	NM_152879,NM_003648,NM_001035282	DGKD	2.66e-09	12	54	2	1	FALSE
ENST00000508803,ENST00000507820,ENST00000508355,ENST00000514045,ENST00000515806,ENST00000436793,ENST00000382892,ENST00000382891,ENST00000353275,ENST00000382895,ENST00000312087,ENST00000420906,ENST00000503128,ENST00000509115,ENST00000398261,ENST00000512700,ENST00000511904,ENST00000513726,ENST00000482415,ENST00000514329,ENST00000502425,ENST00000382888,ENST00000505643,ENST00000503207,ENST00000507094…	NM_001042424,NM_133330,NM_133331,NM_007331,NM_133335,NM_133334	WHSC1	3.39e-09	5	20	2	1	FALSE
ENST00000503991	NR_003004	SCARNA22	3.39e-09	1	2	2	1	FALSE
ENST00000384072,ENST00000364514,ENST00000384772,ENST00000384049	NR_003032	SNORA32	3.65e-09	0	1	1	1	FALSE
ENST00000378536,ENST00000508416,ENST00000478223,ENST00000507179	NM_001039318,NM_003036	SKI	3.65e-09	13	26	2	1	FALSE
ENST00000586171,ENST00000292431,ENST00000585663	NM_052876,NM_001192612	NACC1	3.65e-09	14	10	2	1	FALSE
ENST00000465313,ENST00000528309,ENST00000397472,ENST00000319863,ENST00000354286,ENST00000526650,ENST00000526325,ENST00000442059,ENST00000524550,ENST00000532320,ENST00000530209,ENST00000534603,ENST00000529966,ENST00000533960,ENST00000532839,ENST00000528602,ENST00000529362	NM_001199565,NM_001199566,NM_182612,NM_001114640,NM_001046147	PDDC1	3.65e-09	1	6	2	1	FALSE
UNKNOWN	NR_026874	LOC100130417	3.65e-09	2	1	2	1	FALSE
ENST00000265734,ENST00000467166,ENST00000424848,ENST00000473078,ENST00000491250	NM_001007892,NM_001259,NM_001145306,NM_001192301,NM_001261307	CDK6	3.65e-09	9	87	2	1	FALSE
ENST00000543760,ENST00000494106,ENST00000366672,ENST00000488903,ENST00000541865,ENST00000485438,ENST00000492568	NM_004481,NM_001193103,NM_001261355	GALNT2	3.65e-09	77	124	2	1	FALSE
ENST00000433674,ENST00000434648,ENST00000295006,ENST00000483579,ENST00000480581,ENST00000474026,ENST00000487223,ENST00000492565,ENST00000472601,ENST00000498027,ENST00000492664,ENST00000463997	NM_205080,NM_001146068,NM_001748,NM_001100188,NM_001103086,NM_001112817,NM_001195722,NM_001260667	CAPN2	3.65e-09	2	5	2	1	FALSE
ENST00000536178,ENST00000444095,ENST00000306803,ENST00000432527	NM_020979	SH2B2	4.14e-09	4	4	2	1	FALSE
ENST00000337554,ENST00000396265,ENST00000583777,ENST00000472378,ENST00000428336,ENST00000329563	NM_130344,NM_000714,NM_213753,NM_175776,NM_001256530,NM_001256531,NR_046308,NM_001258111	TSPO	5e-09	1	6	2	1	FALSE
UNKNOWN	UNKNOWN	X	5.16e-09	1	6	2	1	FALSE
ENST00000362512,ENST00000602478	NR_029422	RNU12	6.69e-09	3	3	2	1	FALSE
ENST00000524763,ENST00000527199,ENST00000318562,ENST00000533256,ENST00000534755,ENST00000529346,ENST00000526909,ENST00000530093,ENST00000529680,ENST00000533500,ENST00000527807,ENST00000531348,ENST00000526380,ENST00000530636,ENST00000526198,ENST00000530118,ENST00000524474,ENST00000531471,ENST00000526651,ENST00000532545,ENST00000528770,ENST00000530452,ENST00000533816,ENST00000531393,ENST00000527832…	NM_001131916,NM_022772	EPS8L2	6.88e-09	3	3	2	1	FALSE
ENST00000363120	NR_026703	VTRNA1-1	8.98e-09	1	1	2	1	FALSE
ENST00000351288,ENST00000433118,ENST00000412570,ENST00000454468,ENST00000453750,ENST00000431183,ENST00000409031,ENST00000439886,ENST00000482171,ENST00000491128,ENST00000443958,ENST00000339679,ENST00000452225,ENST00000426662,ENST00000457039,ENST00000491319,ENST00000449159,ENST00000461187,ENST00000430682,ENST00000435455,ENST00000451542,ENST00000473720,ENST00000455548,ENST00000439029,ENST00000441135	NM_001133546,NR_033230,NR_033231,NR_033232,NM_017751,NM_017951,NM_001171083,NM_001205602	SMPD4	9.52e-09	5	7	2	1	FALSE
ENST00000409457,ENST00000336665,ENST00000304032,ENST00000402604,ENST00000409538,ENST00000428334,ENST00000448025,ENST00000418654,ENST00000466575,ENST00000482882,ENST00000453371	NM_014914,NM_001037131,NM_001244888,NM_001261633	AGAP1	9.52e-09	21	109	2	1	FALSE
ENST00000408404	NR_031752	MIR548Q	9.52e-09	1	2	2	1	FALSE
ENST00000367064,ENST00000367063,ENST00000391921,ENST00000367067,ENST00000488171,ENST00000314754,ENST00000367062,ENST00000391920,ENST00000367065,ENST00000482390,ENST00000343420,ENST00000476590,ENST00000465534	NM_000574,NM_001114752,NM_213815,NM_001030303	CD55	1e-08	21	40	2	1	FALSE
ENST00000396024,ENST00000451270,ENST00000332680,ENST00000560014,ENST00000504475,ENST00000421017,ENST00000559647,ENST00000559176,ENST00000558985,ENST00000559818,ENST00000560466,ENST00000558132,ENST00000561022,ENST00000560367,ENST00000558503,ENST00000558998,ENST00000559559,ENST00000557906,ENST00000559113,ENST00000560165,ENST00000560389,ENST00000559725,ENST00000559350,ENST00000558558,ENST00000558986…	NM_205351,NM_001133344,NM_001136015,NM_001002858,NM_001002857,NM_004039,NM_001002961,NM_001123380,NM_001005726,NM_174716,NM_001093788	ANXA2	1e-08	5	13	2	1	FALSE
ENST00000359062,ENST00000542675,ENST00000544307	NM_000921,NM_001163977,NM_213736,NM_001244683	PDE3A	1.71e-08	58	147	2	1	FALSE
ENST00000389934,ENST00000582740,ENST00000349033,ENST00000240361,ENST00000584699,ENST00000581147	NM_031272,NM_001201457,NM_198393,NM_001192568	TEX14	1.79e-08	4	11	2	1	FALSE
ENST00000314136,ENST00000369119,ENST00000369116,ENST00000436748,ENST00000534437,ENST00000369114,ENST00000369115,ENST00000533654,ENST00000534220,ENST00000532744	NM_001006564,NM_001132290,NM_001136479,NM_001136478,NM_030920,NM_001075306	ANP32E	1.8e-08	1	0	1	4.86e-37	FALSE
ENST00000404909,ENST00000394611,ENST00000357732,ENST00000317610,ENST00000337526,ENST00000357376,ENST00000405240,ENST00000394609,ENST00000486085,ENST00000491592,ENST00000485749,ENST00000354474,ENST00000402434,ENST00000438462,ENST00000427710,ENST00000461004	NM_001033911,NM_001133403,NM_020532,NM_153828,NM_007008,NM_207520,NM_207521,NM_001129963,NM_001075138,NM_001113221,NM_001145178,NM_001205127	RTN4	1.8e-08	4	7	2	1	FALSE
ENST00000263382,ENST00000592798,ENST00000590835,ENST00000589468,ENST00000474890	NM_123171,NM_018154,NM_001137625,NM_001075453	ASF1B	1.8e-08	1	2	2	1	FALSE
ENST00000420329,ENST00000560098,ENST00000561218,ENST00000268184,ENST00000558619,ENST00000560927,ENST00000561119,ENST00000558005,ENST00000561290,ENST00000558496,ENST00000561255,ENST00000560047,ENST00000560320,ENST00000558167	NM_022769,NM_001042574	CRTC3	1.8e-08	9	42	2	1	FALSE
ENST00000423118,ENST00000262304,ENST00000472577,ENST00000564313,ENST00000561668,ENST00000487932,ENST00000485120,ENST00000562425,ENST00000567355,ENST00000472659,ENST00000568796,ENST00000483731,ENST00000415938,ENST00000486339,ENST00000567946,ENST00000562297,ENST00000570253,ENST00000566905,ENST00000496574,ENST00000566784,ENST00000471603,ENST00000480227,ENST00000570193,ENST00000469851,ENST00000483814…	NM_001009944,NM_000296,NM_001006650,NM_001246202	PKD1	1.8e-08	14	14	2	1	FALSE
ENST00000276198,ENST00000371951,ENST00000371950	NM_001033932,NM_000868,NM_001006648,NM_001256760,NM_001256761	HTR2C	1.8e-08	1	0	1	1	FALSE
ENST00000401604,ENST00000373985,ENST00000373980,ENST00000373976,ENST00000373975	NM_001098512,NM_006258,NM_001044574,NM_174436,NM_001082042	PRKG1	1.8e-08	1	1	2	1	FALSE
ENST00000497311,ENST00000357388,ENST00000465903,ENST00000485645,ENST00000360111,ENST00000472282,ENST00000472991,ENST00000469762,ENST00000468653,ENST00000467468,ENST00000469858,ENST00000489573,ENST00000462787,ENST00000485867,ENST00000490207,ENST00000344722,ENST00000470240,ENST00000497984,ENST00000487747,ENST00000465563,ENST00000494612,ENST00000467263,ENST00000462668,ENST00000493695,ENST00000484799…	NM_204518,NM_001002800,NM_005496,NM_001181973,NM_001105326,NM_001261676	SMC4	1.8e-08	3	2	2	1	FALSE
ENST00000370425,ENST00000462405,ENST00000294696,ENST00000370424,ENST00000430465,ENST00000497520,ENST00000481900,ENST00000488023,ENST00000448819,ENST00000427444,ENST00000455133	NM_001017975,NM_001181117,NM_001205576	HFM1	2.05e-08	5	4	2	1	FALSE
ENST00000404621,ENST00000405201,ENST00000404121,ENST00000397355,ENST00000356219,ENST00000429285,ENST00000418829,ENST00000443451,ENST00000413172,ENST00000464377,ENST00000440337,ENST00000461081,ENST00000474079,ENST00000440187,ENST00000453428,ENST00000458234,ENST00000473999,ENST00000536195,ENST00000493859,ENST00000448614,ENST00000420698,ENST00000494460,ENST00000542927,ENST00000448008,ENST00000542565	NM_001077261,NM_006312,NM_001206654	NCOR2	2.22e-08	31	84	2	1	FALSE
ENST00000577514,ENST00000395811,ENST00000395807,ENST00000395806,ENST00000444976,ENST00000395804,ENST00000341712,ENST00000584936,ENST00000584067,ENST00000466186,ENST00000578521,ENST00000581955,ENST00000579832,ENST00000313485,ENST00000414263,ENST00000578548,ENST00000429184,ENST00000581855,ENST00000578209,ENST00000462033,ENST00000579361	NM_015134,NM_201274,NM_001105627	MPRIP	2.48e-08	21	62	2	1	FALSE
ENST00000319555,ENST00000562417,ENST00000569086,ENST00000562437,ENST00000563351	NM_153813	ZFPM1	2.48e-08	7	20	2	1	FALSE
ENST00000395337,ENST00000373097,ENST00000373094,ENST00000361724,ENST00000298274,ENST00000504220,ENST00000373088,ENST00000406881,ENST00000361655	NM_032969,NM_001168361,NM_032967,NM_014522,NM_001168362,NM_032968,NM_001168360,NM_001168363	PCDH11X	2.48e-08	1	8	2	1	FALSE
ENST00000283558,ENST00000375645,ENST00000375630,ENST00000487903,ENST00000466946,ENST00000459908,ENST00000418678,ENST00000489577,ENST00000471555,ENST00000459011,ENST00000419631,ENST00000495930,ENST00000493489,ENST00000415301,ENST00000479193	NM_001169079,NM_015205,NM_032189	ATP11A	2.96e-08	6	44	2	1	FALSE
ENST00000517251,ENST00000516052,ENST00000516969,ENST00000516991,ENST00000516913,ENST00000516009,ENST00000516768	NR_002999	SCARNA20	2.96e-08	0	1	1	1	FALSE
ENST00000300896,ENST00000592339,ENST00000593071,ENST00000586238,ENST00000585720,ENST00000590133,ENST00000591768,ENST00000587651,ENST00000589552,ENST00000589335,ENST00000393003,ENST00000588898,ENST00000589761,ENST00000586881,ENST00000590297	NM_032582	USP32	2.96e-08	0	4	1	8.5e-08	FALSE
ENST00000391036,ENST00000364749,ENST00000384423,ENST00000516664,ENST00000384688,ENST00000384366,ENST00000384300,ENST00000391093	NR_002912	SNORA67	3.17e-08	1	2	2	1	FALSE
ENST00000486442,ENST00000489446,ENST00000288548,ENST00000471654	NM_052920,NM_001164494	KLHL29	3.17e-08	0	30	1	1	FALSE
ENST00000378953,ENST00000337752,ENST00000461203,ENST00000407797,ENST00000378947,ENST00000464024	NR_045116	C5orf56	3.39e-08	1	5	2	1	FALSE
ENST00000563679,ENST00000563667,ENST00000325823,ENST00000563522,ENST00000447912,ENST00000535621,ENST00000566426,ENST00000455313,ENST00000562119,ENST00000396410,ENST00000570001,ENST00000569715,ENST00000450288,ENST00000565362,ENST00000567306,ENST00000561930,ENST00000566633,ENST00000565986	NM_015027,NM_001101859	PDXDC1	3.39e-08	0	5	1	0.0165316	FALSE
ENST00000391975,ENST00000310931,ENST00000391976,ENST00000427183,ENST00000373292,ENST00000487169,ENST00000484412,ENST00000442730,ENST00000494862,ENST00000488013,ENST00000470482,ENST00000479894,ENST00000483086,ENST00000479169,ENST00000427487,ENST00000459788,ENST00000471294,ENST00000452931,ENST00000460826,ENST00000488923,ENST00000498595,ENST00000476807,ENST00000477477,ENST00000453141,ENST00000467435…	NM_205096,NM_001133967,NM_203346,NM_005336,NM_001243900	HDLBP	3.42e-08	8	20	2	1	FALSE
ENST00000389658,ENST00000488064,ENST00000492048,ENST00000579014,ENST00000488089,ENST00000490190,ENST00000484335,ENST00000585178	NM_001199806,NM_005559	LAMA1	3.93e-08	5	30	2	1	FALSE
ENST00000384785,ENST00000384675	NR_002590	SNORA41	4.23e-08	1	2	2	1	FALSE
ENST00000236957,ENST00000392221,ENST00000392222,ENST00000445505,ENST00000479587,ENST00000429769,ENST00000460760,ENST00000415904,ENST00000455150,ENST00000435123,ENST00000482103	NM_204901,NM_001037663,NM_001959,NM_021121,NM_001014936,NM_001243524,NM_001266385	EEF1B2	4.23e-08	1	4	2	1	FALSE
ENST00000540511,ENST00000322765,ENST00000539433,ENST00000543623,ENST00000544333,ENST00000545702,ENST00000412978,ENST00000546350,ENST00000542173,ENST00000538988,ENST00000590644,ENST00000538093,ENST00000544446	NM_133373,NM_001193028	PLCD3	4.69e-08	4	16	2	1	FALSE
ENST00000379655,ENST00000465878,ENST00000445690,ENST00000565397,ENST00000421376,ENST00000541240,ENST00000540079,ENST00000543930,ENST00000562903,ENST00000564136,ENST00000539578,ENST00000565753,ENST00000565270,ENST00000563266,ENST00000565481,ENST00000562503,ENST00000569222,ENST00000562311,ENST00000569112,ENST00000562984,ENST00000567204,ENST00000566648,ENST00000561524,ENST00000569619,ENST00000565351…	NM_001133269,NM_001130100,NM_005550,NM_001130099	KIFC3	4.69e-08	2	15	2	1	FALSE
ENST00000520348,ENST00000520944,ENST00000521399,ENST00000520619,ENST00000521127	NR_002599	SNHG6	4.69e-08	3	1	2	1	FALSE
ENST00000379370,ENST00000477585,ENST00000469403,ENST00000479707,ENST00000466223,ENST00000478677,ENST00000492947,ENST00000419249,ENST00000461111	NM_205527,NM_198576	AGRN	4.69e-08	13	16	2	1	FALSE
ENST00000265755,ENST00000455841,ENST00000424337,ENST00000476977,ENST00000489094,ENST00000470715,ENST00000486086	NM_016328,NM_005685,NM_001199207,NM_001191468,NM_001265985	GTF2IRD1	4.69e-08	25	47	2	1	FALSE
ENST00000587730,ENST00000324340,ENST00000589318,ENST00000588692,ENST00000242776,ENST00000592927,ENST00000592391,ENST00000588542,ENST00000454233,ENST00000589675,ENST00000593026,ENST00000590315,ENST00000590556,ENST00000590260,ENST00000586558,ENST00000590239,ENST00000586993,ENST00000592632,ENST00000593008,ENST00000591275,ENST00000590696	NM_001193491,NM_005804,NM_001034752,NR_038336,NR_046366	DDX39A	4.84e-08	2	5	2	1	FALSE
ENST00000582471,ENST00000293842,ENST00000584164,ENST00000578069,ENST00000584441,ENST00000582485,ENST00000582556,ENST00000584906,ENST00000583011,ENST00000585176,ENST00000584343,ENST00000578812,ENST00000583515,ENST00000578115	NM_001193566,NM_000987,NM_001015512,NM_001243458,NM_001252400	RPL26	4.84e-08	2	2	2	1	FALSE
ENST00000429617,ENST00000369331,ENST00000369321,ENST00000345633,ENST00000369318,ENST00000369315,ENST00000452490,ENST00000468790,ENST00000487232	NM_033340,NM_001227,NM_033339,NM_033338,NM_001267056,NM_001267057,NM_001267058	CASP7	5.32e-08	1	3	2	1	FALSE
ENST00000497825,ENST00000361436,ENST00000536368,ENST00000497322,ENST00000483598	NM_001193560,NM_000976,NM_205797,NM_001251929,NM_001251956	RPL12	6.45e-08	5	6	2	1	FALSE
ENST00000307650,ENST00000491999,ENST00000474840,ENST00000575894	NM_001193773,NM_138418,NM_001079511,NM_001251932	FAM195A	6.45e-08	4	4	2	1	FALSE
ENST00000364432	NR_002449	SNORA65	6.45e-08	1	2	2	1	FALSE
ENST00000432186,ENST00000492475,ENST00000006251,ENST00000403581,ENST00000459857,ENST00000492289,ENST00000336985,ENST00000457960,ENST00000403696,ENST00000431834,ENST00000432916,ENST00000477331,ENST00000455389,ENST00000495017,ENST00000475850	NM_001029980,NM_015366,NM_001017530,NM_181333,NM_001017528,NM_001198721,NM_001017529,NM_001101305,NM_122355,NM_001204382,NM_001204409,NM_001204407,NM_001204412	PRR5	6.45e-08	2	5	2	0.011709	FALSE
ENST00000361473,ENST00000352766,ENST00000495250,ENST00000515632	NM_181334	PRR5-ARHGAP8	6.45e-08	4	10	2	1	FALSE
ENST00000372621,ENST00000541520,ENST00000470271,ENST00000475060,ENST00000479480,ENST00000543104,ENST00000372616,ENST00000480420,ENST00000484267,ENST00000463285,ENST00000486889,ENST00000497210,ENST00000464283,ENST00000463423,ENST00000498694	NM_001905	CTPS1	8.83e-08	4	17	2	1	FALSE
ENST00000262940,ENST00000461209,ENST00000449970,ENST00000522223,ENST00000541884,ENST00000462172,ENST00000523568,ENST00000521822,ENST00000521397,ENST00000520577,ENST00000519539,ENST00000522801,ENST00000519878,ENST00000521076,ENST00000520042,ENST00000522443,ENST00000521892	NM_006989,NM_001079877	RASA4	8.83e-08	2	8	2	1	FALSE
ENST00000370321,ENST00000470843,ENST00000315741,ENST00000461952,ENST00000497519	NM_204581,NM_000969,NM_001081885,NM_001114284,NM_001035306,NM_001195679,NM_001183945	RPL5	8.83e-08	6	4	2	1	FALSE
ENST00000541275,ENST00000437231,ENST00000447282,ENST00000359282,ENST00000439930,ENST00000549863,ENST00000359462,ENST00000550520,ENST00000546463,ENST00000552296,ENST00000550192,ENST00000551104,ENST00000552980,ENST00000552819,ENST00000550910,ENST00000455667,ENST00000548933,ENST00000546652,ENST00000562264,ENST00000548190,ENST00000550585,ENST00000547987,ENST00000553064,ENST00000547859,ENST00000549272…	NM_001098620,NM_001128911,NM_001128914,NM_005016,NM_001128912,NM_031989,NM_001128913,NM_001034711,NM_001244512	PCBP2	8.83e-08	7	18	2	1	FALSE
ENST00000419213,ENST00000316347,ENST00000454939,ENST00000418948,ENST00000454314,ENST00000414456,ENST00000426144,ENST00000441915,ENST00000456560,ENST00000439487,ENST00000434030,ENST00000456210,ENST00000418576,ENST00000419007,ENST00000433753,ENST00000416295	NM_004636,NM_001005914,NM_001205747	SEMA3B	8.83e-08	4	8	2	1	FALSE
ENST00000260126,ENST00000524945,ENST00000526750,ENST00000530307,ENST00000532388,ENST00000528658,ENST00000524703,ENST00000531422	NM_001146008,NM_030958,NM_001146009	SLCO5A1	8.83e-08	3	1	2	1	FALSE
ENST00000580972,ENST00000385771	NR_023343	RNU4ATAC	8.83e-08	1	0	1	1	FALSE
ENST00000409078,ENST00000541859,ENST00000541377,ENST00000397587,ENST00000455322,ENST00000263710,ENST00000545861,ENST00000452274,ENST00000472776,ENST00000463621,ENST00000430234,ENST00000491646,ENST00000418989,ENST00000449975,ENST00000474065,ENST00000480007,ENST00000485112	NM_001142273,NM_001142274,NM_015282,NM_001191492,NM_001207051	CLASP1	8.83e-08	1	22	2	1	FALSE
ENST00000392011,ENST00000484097,ENST00000416021,ENST00000409212,ENST00000489601,ENST00000344528,ENST00000444916,ENST00000446904,ENST00000462602,ENST00000493436,ENST00000454947	NM_014521,NM_001144088,NM_001261601	SH3BP4	1.13e-07	11	31	2	1	FALSE
ENST00000555895,ENST00000361611,ENST00000460922,ENST00000493471,ENST00000425762,ENST00000334454	NM_001132591,NM_002797,NM_001130725,NM_001144932,NM_001037612,NM_001260845	PSMB5	1.21e-07	1	0	1	1	FALSE
ENST00000375441,ENST00000451881,ENST00000326335,ENST00000375440,ENST00000488558,ENST00000474116,ENST00000494985,ENST00000463426,ENST00000498562,ENST00000470067,ENST00000472083	NM_003589,NM_001008895	CUL4A	1.21e-07	10	29	2	1	FALSE
ENST00000353383,ENST00000489697,ENST00000471135,ENST00000395774,ENST00000261641,ENST00000583166,ENST00000582514	NM_030665,NM_001181112	RAI1	1.21e-07	22	52	2	1	FALSE
ENST00000360458,ENST00000451301,ENST00000422154,ENST00000433176,ENST00000372620,ENST00000423833,ENST00000441076,ENST00000434230,ENST00000418819,ENST00000442614,ENST00000492116,ENST00000422355,ENST00000474653,ENST00000498064,ENST00000467755,ENST00000488331	NM_001098562,NM_001133861,NM_001142418,NM_001142419,NM_001142421,NM_001142422,NM_001142424,NM_001142425,NM_001142427,NM_001142428,NM_001142430,NM_001142431,NM_001142420,NM_001142423,NM_001142426,NM_001142429,NM_001142432,NM_012286,NM_001099084	MORF4L2	1.21e-07	2	4	2	1	FALSE
ENST00000602301,ENST00000365160	NR_030583	VTRNA2-1	1.21e-07	1	1	2	1	FALSE
ENST00000343262,ENST00000526522,ENST00000533161,ENST00000531065,ENST00000530225,ENST00000527871,ENST00000527109,ENST00000533872,ENST00000532746,ENST00000533186,ENST00000526586,ENST00000529806,ENST00000534461,ENST00000527302,ENST00000526908,ENST00000527826,ENST00000563194	NM_111231,NM_118742,NM_001193577,NM_002952,NM_001033613,NM_001180988	RPS2	1.21e-07	6	9	2	1	FALSE
ENST00000535206,ENST00000379731,ENST00000541851	NM_205202,NM_001497,NM_177512,NM_001246211,NM_001258145	B4GALT1	1.41e-07	8	18	2	1	FALSE
ENST00000536684	NM_001193596,NM_001190702	MTRNR2L8	1.66e-07	4	4	2	1	FALSE
ENST00000509990,ENST00000506147,ENST00000512107,ENST00000448190,ENST00000507692,ENST00000506188,ENST00000361059,ENST00000513259,ENST00000514694,ENST00000504203,ENST00000502929,ENST00000394800,ENST00000507197,ENST00000509644,ENST00000508735,ENST00000514110,ENST00000505522,ENST00000505016,ENST00000502394,ENST00000394805,ENST00000512876,ENST00000513678,ENST00000513121,ENST00000504045,ENST00000504311…	NM_204147,NM_001135438,NM_001133091,NR_036535,NM_199189,NM_001194955,NM_018834,NM_001194956,NM_001194954,NM_001102486,NM_001205232,NM_001205233,NM_001205237,NM_001205238,NM_001205240,NM_001205256,NM_001205257,NM_001205258,NM_001205261,NM_001205264,NM_001205269	MATR3	1.66e-07	16	23	2	1	FALSE
ENST00000461395,ENST00000358078,ENST00000347842,ENST00000474489,ENST00000473709	NM_182847	ASIC4	1.66e-07	1	0	1	1	FALSE
ENST00000380909,ENST00000303434,ENST00000463233,ENST00000395827,ENST00000395829,ENST00000472677	NM_001030732,NM_025204,NM_001034452	TRABD	1.66e-07	2	5	2	1	FALSE
UNKNOWN	NR_036444,NR_033925	FOXF1-AS1	1.87e-07	3	24	2	1	FALSE
ENST00000364578,ENST00000516639,ENST00000364921,ENST00000362763,ENST00000364359,ENST00000362493,ENST00000363548,ENST00000363450,ENST00000365579,ENST00000362682,ENST00000362603,ENST00000516293,ENST00000363260	NR_002586,NR_033236	SNORA63	1.87e-07	0	3	1	1	FALSE
ENST00000348165,ENST00000389103,ENST00000430750,ENST00000469336,ENST00000470408,ENST00000497368,ENST00000494532,ENST00000474153	NM_001030967,NM_014671,NM_001192188	UBE3C	2.02e-07	13	25	2	1	FALSE
ENST00000388913,ENST00000395103	NM_198488	FAM83H	2.16e-07	6	6	2	1	FALSE
ENST00000364672,ENST00000365110,ENST00000516634,ENST00000516575,ENST00000365493,ENST00000365504,ENST00000364287	NR_002324,NR_036674	SNORA62	2.16e-07	2	2	2	1	FALSE
ENST00000301821,ENST00000477325,ENST00000475346,ENST00000487876,ENST00000458478,ENST00000443003,ENST00000444512,ENST00000490490,ENST00000478027,ENST00000495394	NM_001007823,NM_001195480,NM_001012321,NM_002295,NM_001143951,NM_001037146,NM_174379,NM_001252230	RPSA	2.16e-07	6	6	2	1	FALSE
ENST00000414786,ENST00000445220,ENST00000262795	NM_033517,NM_001267763	SHANK3	2.27e-07	10	34	2	0.0386896	FALSE
ENST00000377351,ENST00000412206,ENST00000427561,ENST00000442035,ENST00000457753,ENST00000335972,ENST00000451702,ENST00000490869,ENST00000377269	NM_128566,NM_003334,NM_153280,NM_001102477,NM_001082371,NM_001179775	UBA1	2.27e-07	9	11	2	1	FALSE
ENST00000407835,ENST00000438587,ENST00000491520,ENST00000455750,ENST00000437685,ENST00000263201,ENST00000483431,ENST00000404724,ENST00000487669,ENST00000428937,ENST00000471470,ENST00000493724	NM_113414,NM_001178010,NM_001178011,NM_003504,NM_001024490,NM_001181990	CDC45	2.27e-07	2	7	2	0.0163946	FALSE
ENST00000537646,ENST00000535923,ENST00000546111,ENST00000543465,ENST00000542912,ENST00000440277,ENST00000399433,ENST00000545555,ENST00000545167,ENST00000544888,ENST00000536316,ENST00000544134,ENST00000546217,ENST00000542294	NM_100266,NM_202026,NM_202027,NM_001080885,NM_001132131,NM_001144831,NM_001046198,NM_001181360,NM_001243556,NM_001266316,NM_001267700	PHB2	2.27e-07	2	5	2	1	FALSE
ENST00000391893,ENST00000403703,ENST00000389221,ENST00000248104,ENST00000562537,ENST00000397464,ENST00000508903,ENST00000402641,ENST00000511095,ENST00000513783,ENST00000515195,ENST00000397462,ENST00000382757,ENST00000509981,ENST00000301712,ENST00000502438,ENST00000503648,ENST00000566707,ENST00000561783	NM_001037125,NM_001193389,NM_023076,NM_001193388	UNKL	2.27e-07	9	13	2	0.0362753	FALSE
ENST00000459155	NR_003010	SCARNA12	2.27e-07	2	4	2	1	FALSE
ENST00000327892,ENST00000435534,ENST00000330914,ENST00000396389,ENST00000396384,ENST00000421473,ENST00000548314,ENST00000549614,ENST00000413547,ENST00000419551,ENST00000454620,ENST00000422674,ENST00000550696,ENST00000548023,ENST00000435546,ENST00000420400,ENST00000453350,ENST00000419792,ENST00000549410,ENST00000547690,ENST00000436335,ENST00000425136,ENST00000444441,ENST00000436628,ENST00000549230…	NM_205315,NM_001032813,NM_001045509,NM_178014,NM_001046549	TUBB	2.27e-07	3	3	2	1	FALSE
ENST00000435159,ENST00000315208,ENST00000537538	NM_001136103,NM_001197119	TMEM132C	2.27e-07	1	1	2	1	FALSE
ENST00000552023,ENST00000281928,ENST00000548784,ENST00000552447,ENST00000548694,ENST00000552340,ENST00000549786,ENST00000549755,ENST00000551197,ENST00000548743	NM_015335,NM_001192468,NM_001261532	MED13L	2.27e-07	2	21	2	1	FALSE
ENST00000459342,ENST00000458900,ENST00000458800	NR_003033	SNORD5	2.27e-07	1	0	1	1	FALSE
ENST00000408237,ENST00000408133,ENST00000408163,ENST00000408471,ENST00000408318,ENST00000408789,ENST00000408823	NR_002953	SNORA11	2.48e-07	0	1	1	1	FALSE
ENST00000330634,ENST00000398337,ENST00000392634,ENST00000252527,ENST00000474229,ENST00000480763,ENST00000477497,ENST00000481338	NM_001132099,NM_022489,NM_001031714,NM_032714	INF2	2.48e-07	6	16	2	1	FALSE
ENST00000253251,ENST00000377157,ENST00000377153,ENST00000343090,ENST00000462658,ENST00000475795,ENST00000470736,ENST00000466379,ENST00000488228,ENST00000487244,ENST00000465408	NM_001105562,NM_006048,NM_001102504	UBE4B	2.86e-07	0	12	1	1	FALSE
ENST00000217133	NM_205445,NM_030773,NM_001134989,NM_001113696,NM_001144100	TUBB1	3.07e-07	0	1	1	0.000297733	FALSE
ENST00000374333,ENST00000344304,ENST00000395889,ENST00000374320	NM_001003811,NM_031276	TEX11	3.07e-07	0	1	1	0.00179589	FALSE
ENST00000304987,ENST00000533868	NM_001131291,NM_015191,NM_001192277,NM_130616,NM_001251359	SIK2	3.07e-07	5	29	2	1	FALSE
ENST00000376327,ENST00000376322	NM_002668,NM_203363,NM_001082097,NM_001183700,NM_001244435,NM_001265866	PLP2	3.11e-07	1	3	2	1	FALSE
UNKNOWN	NR_003605,NR_003604,NR_003606,NR_036658,NR_036659	ZNFX1-AS1	3.11e-07	23	15	2	1	FALSE
ENST00000376929,ENST00000506042,ENST00000514093,ENST00000506690,ENST00000512234,ENST00000422245,ENST00000481335,ENST00000464493,ENST00000389805,ENST00000508284,ENST00000504627,ENST00000453046,ENST00000402874,ENST00000510187,ENST00000360718,ENST00000485412,ENST00000466342	NM_001132076,NM_003900,NM_001142298,NM_001142299,NM_176641,NM_001163043,NM_001266358	SQSTM1	3.11e-07	10	23	2	1	FALSE
ENST00000602813,ENST00000387069	NR_004407	RNU11	3.11e-07	1	2	2	1	FALSE
ENST00000417523,ENST00000359863,ENST00000355540,ENST00000446306,ENST00000456197,ENST00000480695	NM_003496,NM_001192137,NM_001244580	TRRAP	3.11e-07	4	12	2	1	FALSE
ENST00000259523,ENST00000517291,ENST00000377970,ENST00000524013,ENST00000520751	NM_001030952,NM_001142873,NM_001142794,NM_002467,NM_001003246,NM_001173446,NM_001005154,NM_001046074,NM_001009426	MYC	3.11e-07	3	5	2	1	FALSE
ENST00000427707,ENST00000414305,ENST00000427148,ENST00000543135,ENST00000357639,ENST00000423831,ENST00000358229,ENST00000470930,ENST00000494023	NM_001133260,NM_005021,NM_001075923	ENPP3	3.53e-07	0	1	1	1	FALSE
ENST00000245407,ENST00000437841,ENST00000435065,ENST00000415928,ENST00000461013,ENST00000448810,ENST00000479605,ENST00000447841,ENST00000475308	NM_001045828,NM_001168756,NM_003060,NM_001046502	SLC22A5	3.53e-07	1	11	2	1	FALSE
ENST00000334944,ENST00000377394,ENST00000448404,ENST00000227503,ENST00000377390,ENST00000377387,ENST00000422298,ENST00000443908,ENST00000413725,ENST00000433274,ENST00000486867,ENST00000477596,ENST00000489544,ENST00000486960,ENST00000496969,ENST00000413951,ENST00000432725,ENST00000482693,ENST00000463343,ENST00000472725	NM_001169091,NM_201997,NM_004630,NM_201995,NM_201998,NM_001178030,NM_001178031,NR_033649,NR_033650,NM_001081614,NM_001171327,NM_079915	SF1	3.79e-07	1	6	2	1	FALSE
ENST00000373719,ENST00000488174,ENST00000373701,ENST00000472270,ENST00000498566,ENST00000444774,ENST00000455587,ENST00000459760,ENST00000462638,ENST00000466181,ENST00000474633	NM_001133824,NM_181673,NM_181672,NM_001039748,NM_001098070	OGT	4.24e-07	2	13	2	1	FALSE
ENST00000368407,ENST00000368406,ENST00000469878,ENST00000474413,ENST00000497282	NM_004428,NM_182685,NM_001123110,NM_001034292	EFNA1	4.24e-07	5	2	2	1	FALSE
ENST00000403222,ENST00000438716,ENST00000407373,ENST00000332585,ENST00000382310,ENST00000446658,ENST00000401475,ENST00000445781,ENST00000477355,ENST00000464341,ENST00000496367,ENST00000424224,ENST00000437268,ENST00000535268,ENST00000431368,ENST00000453621,ENST00000454145,ENST00000452656,ENST00000496575,ENST00000433183	NM_001133036,NM_030758,NM_001192252	OSBP2	4.24e-07	6	34	2	1	FALSE
ENST00000361745,ENST00000446292,ENST00000440641,ENST00000436069,ENST00000437511,ENST00000475794,ENST00000471829,ENST00000487922,ENST00000315913,ENST00000372289,ENST00000463950,ENST00000372290,ENST00000488433,ENST00000483741,ENST00000494092	NM_001034024,NM_019100,NM_001034023,NM_001075346,NM_137659,NM_001243640,NM_001246459	DMAP1	4.24e-07	2	4	2	1	FALSE
ENST00000356321,ENST00000559564	NM_014106,NM_001261541	ZNF770	4.24e-07	2	0	1	3.11e-07	FALSE
ENST00000418539	NR_001568	BCYRN1	4.24e-07	6	29	2	1	FALSE
ENST00000046640,ENST00000381870,ENST00000452111,ENST00000441220,ENST00000574776,ENST00000414524,ENST00000495445,ENST00000467663,ENST00000488623,ENST00000574218,ENST00000399306,ENST00000576979	NM_001031681,NM_004937,NM_001102264	CTNS	4.24e-07	1	4	2	0.0227984	FALSE
ENST00000373913,ENST00000401952,ENST00000373907,ENST00000339266,ENST00000475894,ENST00000482872,ENST00000495241,ENST00000491207,ENST00000482037,ENST00000340491,ENST00000479220,ENST00000489701,ENST00000479951,ENST00000478910,ENST00000497862,ENST00000477195	NM_001133849,NM_014902,NM_183006,NM_001042486,NM_001077942,NM_001266455	DLGAP4	4.37e-07	0	12	1	1	FALSE
ENST00000359741,ENST00000520644,ENST00000240095,ENST00000381237,ENST00000289952,ENST00000524285,ENST00000520832,ENST00000519960,ENST00000522881,ENST00000517552,ENST00000517370,ENST00000518348	NM_015359,NM_001135154,NM_001128431,NM_001135153,NM_001098036	SLC39A14	5.77e-07	2	6	2	1	FALSE
ENST00000401073,ENST00000468130,ENST00000373481,ENST00000294521,ENST00000373480	NM_020888,NM_001198973,NM_001198972	KIAA1522	5.77e-07	5	7	2	1	FALSE
ENST00000376185,ENST00000480131,ENST00000475917,ENST00000453381	NR_037853	ATP6V1G2-DDX39B	5.77e-07	7	11	2	1	FALSE
ENST00000369836,ENST00000336075,ENST00000464733,ENST00000461767,ENST00000479578,ENST00000326729,ENST00000495742,ENST00000369833,ENST00000485640,ENST00000489066,ENST00000478397,ENST00000493171,ENST00000493395	NR_024538,NM_000850,NM_147148	GSTM4	5.77e-07	1	0	1	1	FALSE
ENST00000374114,ENST00000359646,ENST00000374104,ENST00000424458,ENST00000431148,ENST00000435161	NM_206986,NM_001032840,NM_001169012,NM_001132002,NM_006047,NM_152838,NM_001198838,NM_001198840,NM_001171748,NM_001171746,NM_001198892,NM_001171333,NM_001251846	RBM12	5.77e-07	2	4	2	1	FALSE
ENST00000352393,ENST00000317677,ENST00000415920,ENST00000498814,ENST00000473373,ENST00000462352,ENST00000397443,ENST00000397445,ENST00000397446,ENST00000317619,ENST00000483359,ENST00000397442,ENST00000483495,ENST00000401607,ENST00000437340,ENST00000498056,ENST00000430570,ENST00000412056,ENST00000486021,ENST00000414664,ENST00000416778,ENST00000439806,ENST00000439669,ENST00000420363,ENST00000434795…	NM_001171738,NR_037188,NM_003915,NM_152926,NM_152925,NM_152927,NM_001198863,NM_152928,NM_001171749,NM_001171745,NM_001143703,NM_001076940,NM_001161890,NM_001171493,NM_001267789	CPNE1	5.77e-07	4	10	2	0.0176298	FALSE
ENST00000469655,ENST00000489935,ENST00000369787,ENST00000413138,ENST00000438661,ENST00000412512,ENST00000459877	NR_036437,NM_004978,NM_001039574,NM_001192780	KCNC4	5.77e-07	1	3	2	1	FALSE
ENST00000417556,ENST00000396172,ENST00000458640,ENST00000462256,ENST00000376177,ENST00000484566,ENST00000474961,ENST00000462421,ENST00000415382,ENST00000417023,ENST00000478365,ENST00000482195,ENST00000431908,ENST00000481456,ENST00000427214,ENST00000453105,ENST00000428098,ENST00000419338,ENST00000456662,ENST00000449074,ENST00000428450,ENST00000449757,ENST00000456976,ENST00000418897,ENST00000419020…	NM_001047143,NM_001114163,NM_001134014,NM_004640,NM_080598,NR_037852,NM_001014377,NM_001005157,NM_001033629	DDX39B	5.77e-07	7	11	2	1	FALSE
ENST00000398532,ENST00000577454,ENST00000578648,ENST00000579565,ENST00000578826,ENST00000582920,ENST00000582884,ENST00000581246,ENST00000339569,ENST00000583127,ENST00000580086	NM_001012241,NM_001179531,NM_001099836	MSL1	5.77e-07	2	0	1	0.00422907	FALSE
ENST00000599564,ENST00000594597,ENST00000317991,ENST00000504615,ENST00000600231,ENST00000411896,ENST00000598073,ENST00000599476,ENST00000598580,ENST00000595596,ENST00000598362,ENST00000598118	NM_001136199,NM_020895	GRAMD1A	5.77e-07	2	12	2	1	FALSE
ENST00000305366,ENST00000472441,ENST00000493348,ENST00000493298	NM_001131452,NM_014220,NM_001075980,NM_001266715	TM4SF1	5.84e-07	2	11	2	1	FALSE
ENST00000535681,ENST00000306773,ENST00000571100,ENST00000575212	NM_002522,NM_001192354,NM_001266044	NPTX1	5.98e-07	10	18	2	1	FALSE
ENST00000421699,ENST00000462089,ENST00000496221,ENST00000486411,ENST00000461031,ENST00000470630,ENST00000450617,ENST00000490257,ENST00000468488,ENST00000458730,ENST00000490628	NM_004486,NM_001192195	GOLGA2	6.25e-07	0	8	1	3.32e-14	FALSE
ENST00000535781,ENST00000266079	NM_001131843,NM_012469,NM_001046375	PRPF6	6.72e-07	1	2	2	1	FALSE
ENST00000216085,ENST00000413137,ENST00000496342,ENST00000414672,ENST00000406335,ENST00000493894,ENST00000488106	NM_001194302,NM_012265,NM_001080238	RHBDD3	7.19e-07	2	7	2	0.0226317	FALSE
ENST00000391305	NR_002977	SNORA45	7.74e-07	2	3	2	1	FALSE
ENST00000395655,ENST00000361278,ENST00000258770,ENST00000494076,ENST00000495973,ENST00000483615,ENST00000482482,ENST00000478116,ENST00000488222,ENST00000484326,ENST00000478532,ENST00000461363,ENST00000477328,ENST00000471142,ENST00000475893,ENST00000482285,ENST00000495078	NM_004749,NM_030900,NM_199122,NM_001076967,NM_001261834	TBRG4	7.74e-07	0	4	1	1	FALSE
ENST00000384111	NR_002919	SNORA5A	7.74e-07	0	1	1	1	FALSE
ENST00000393240,ENST00000261205,ENST00000457153,ENST00000552074,ENST00000549454,ENST00000547046,ENST00000549671,ENST00000551304,ENST00000552744,ENST00000552624,ENST00000446242,ENST00000549559	NM_205171,NM_001133924,NM_001135806,NM_001135805,NM_005639,NM_174192,NM_001048260,NM_001184192	SYT1	7.87e-07	12	39	2	1	FALSE
ENST00000517671,ENST00000296930,ENST00000521672,ENST00000351986,ENST00000393820,ENST00000523339,ENST00000523622,ENST00000518587,ENST00000521260,ENST00000521710,ENST00000519955,ENST00000524204	NM_205267,NM_001131605,NM_002520,NM_199185,NM_001037738,NM_001035441,NM_001171319,NM_001251976,NM_001252171	NPM1	7.87e-07	6	15	2	1	FALSE
ENST00000472722,ENST00000482119,ENST00000418323,ENST00000341310,ENST00000445186,ENST00000452692,ENST00000438299,ENST00000452319,ENST00000314490,ENST00000361492,ENST00000437950,ENST00000435313,ENST00000433812,ENST00000360874	NM_005270,NM_001192250	GLI2	7.87e-07	6	30	2	1	FALSE
ENST00000431643,ENST00000360876,ENST00000413917,ENST00000397011,ENST00000463229,ENST00000468250,ENST00000463026,ENST00000466199,ENST00000475415,ENST00000468611,ENST00000465670,ENST00000494658	NM_003751,NM_001037283,NM_001102356	EIF3B	7.87e-07	2	8	2	1	FALSE
ENST00000267205,ENST00000537265,ENST00000537171,ENST00000535560	NM_001030660,NM_019034,NM_001123190,NM_001040602,NM_001127285	RHOF	7.87e-07	1	3	2	1	FALSE
ENST00000454754,ENST00000263119,ENST00000405822,ENST00000445422,ENST00000398319,ENST00000474981,ENST00000484593,ENST00000496016,ENST00000467937,ENST00000337989,ENST00000495121,ENST00000485008,ENST00000459824	NM_001199281,NM_001201429,NM_012295	CABIN1	7.87e-07	3	20	2	1	FALSE
UNKNOWN	NR_038848	LOC643401	7.87e-07	5	10	2	0.0491628	FALSE
ENST00000278070,ENST00000413464,ENST00000370012,ENST00000489648,ENST00000462933,ENST00000495914	NM_015062,NM_001205755	PPRC1	7.87e-07	2	3	2	1	FALSE
ENST00000530124,ENST00000257247,ENST00000525875,ENST00000533365,ENST00000378024,ENST00000530285,ENST00000528508,ENST00000531324	NM_024060,NM_001620	AHNAK	8.93e-07	5	8	2	1	FALSE
UNKNOWN	NM_001135865	LOC100132247	8.93e-07	0	1	1	1	FALSE
ENST00000583517,ENST00000407008,ENST00000582037,ENST00000496808,ENST00000584188,ENST00000584878	NM_016231,NM_001193253	NLK	9.55e-07	0	10	1	4.05e-06	FALSE
ENST00000431231,ENST00000437668,ENST00000582409,ENST00000443378,ENST00000549246,ENST00000548333,ENST00000581782,ENST00000578665,ENST00000548703,ENST00000581023,ENST00000547158,ENST00000583703	NM_001199417	ARHGAP23	9.87e-07	16	41	2	1	FALSE
ENST00000361069,ENST00000480883,ENST00000355452,ENST00000462567	NM_006059	LAMC3	9.87e-07	11	17	2	1	FALSE
ENST00000372923,ENST00000341179,ENST00000475805,ENST00000393594,ENST00000486160,ENST00000441149,ENST00000482638,ENST00000463998,ENST00000479174,ENST00000493925	NM_004408,NM_001005336,NM_001131049,NM_001076820,NM_001181821	DNM1	1.01e-06	9	30	2	1	FALSE
ENST00000375715,ENST00000375708,ENST00000550066,ENST00000548585,ENST00000495386,ENST00000546883,ENST00000476440,ENST00000493846	NM_001080716,NM_004560,NM_001105464	ROR2	1.03e-06	18	47	2	1	FALSE
ENST00000467933,ENST00000463366,ENST00000494534,ENST00000491897	NR_034178	SRGAP2B	1.07e-06	3	38	2	1	FALSE
ENST00000371753,ENST00000277554,ENST00000467669	NM_001030681,NM_144653,NM_001192649,NM_001261341	NACC2	1.07e-06	6	26	2	1	FALSE
ENST00000306052,ENST00000529670,ENST00000371454,ENST00000354412,ENST00000465675,ENST00000480045,ENST00000347547,ENST00000459674,ENST00000460214,ENST00000481431,ENST00000475501,ENST00000496580	NM_205186,NM_033300,NM_004631,NM_017522,NM_001018054,NM_001199891,NM_001097565	LRP8	1.07e-06	19	25	2	1	FALSE
ENST00000354570,ENST00000454590,ENST00000544465,ENST00000438100,ENST00000432797	NM_001031072,NM_001133034,NM_001198609,NM_001198615,NM_001198618,NM_003980,NM_001198616,NM_001198619,NM_001198608,NM_001198611,NM_001198614,NM_001198617,NM_001101874	MAP7	1.07e-06	12	32	2	1	FALSE
ENST00000587394,ENST00000589097,ENST00000588450,ENST00000592552,ENST00000326631,ENST00000589791,ENST00000588633,ENST00000588545,ENST00000587962,ENST00000586608,ENST00000591099,ENST00000585423,ENST00000586497,ENST00000588356	NM_001031503,NM_018049,NM_001034569,NM_001266867	PLEKHJ1	1.07e-06	1	0	1	0.0374541	FALSE
ENST00000368468,ENST00000368466	NM_005907,NM_213885,NM_001195721,NM_001205972	MAN1A1	1.07e-06	2	1	2	1	FALSE
UNKNOWN	NR_038291	LOC100507127	1.07e-06	1	7	2	1	FALSE
ENST00000520539,ENST00000220959,ENST00000517465,ENST00000521922,ENST00000518205,ENST00000521767,ENST00000521312,ENST00000521566,ENST00000519528,ENST00000520898,ENST00000519365,ENST00000518145,ENST00000522327	NM_015902,NM_001192417	UBR5	1.07e-06	1	5	2	1	FALSE
ENST00000462705,ENST00000393785,ENST00000471418,ENST00000481632,ENST00000474710,ENST00000357258,ENST00000464560,ENST00000479879,ENST00000470311,ENST00000482689,ENST00000463890,ENST00000486152,ENST00000491500,ENST00000480832,ENST00000492665,ENST00000470556,ENST00000463497,ENST00000488663,ENST00000468769,ENST00000470186	NM_001164342,NM_015642,NM_001164343,NM_001164344,NM_001164345,NM_001164346,NM_001164347	ZBTB20	1.07e-06	15	130	2	1	FALSE
ENST00000263409,ENST00000453190,ENST00000508477,ENST00000506003,ENST00000503088,ENST00000506990,ENST00000512723,ENST00000511561,ENST00000507786	NM_204575,NM_001127671,NM_002310,NM_001005760,NM_001192263	LIFR	1.07e-06	3	19	2	1	FALSE
ENST00000431285,ENST00000402466,ENST00000402198,ENST00000450326,ENST00000463180,ENST00000478475,ENST00000415650,ENST00000443339,ENST00000406341,ENST00000468208,ENST00000407969,ENST00000442373,ENST00000302463,ENST00000466172,ENST00000490791,ENST00000493918,ENST00000399686,ENST00000413704,ENST00000497213,ENST00000466242,ENST00000464410,ENST00000488236,ENST00000421188,ENST00000478961,ENST00000476740…	NM_001080517,NM_001206005,NM_001265978	SETD5	1.07e-06	5	15	2	1	FALSE
ENST00000226319,ENST00000511647,ENST00000452328,ENST00000504089,ENST00000512960,ENST00000503785,ENST00000514740,ENST00000510308,ENST00000511925,ENST00000413543,ENST00000507833,ENST00000508997	NM_199320,NM_024900,NM_001015559,NM_001266133	PHF17	1.07e-06	2	11	2	1	FALSE
ENST00000357008,ENST00000309577,ENST00000544040,ENST00000544484,ENST00000535717,ENST00000542717,ENST00000536301,ENST00000540960,ENST00000537634,ENST00000545083,ENST00000536999,ENST00000535810,ENST00000545942,ENST00000430771,ENST00000545584	NM_001273,NM_001206501	CHD4	1.1e-06	4	3	2	1	FALSE
ENST00000517276,ENST00000517183,ENST00000516089,ENST00000516918	NR_003012	SCARNA11	1.1e-06	1	2	2	1	FALSE
ENST00000592996,ENST00000593069,ENST00000308964,ENST00000587213,ENST00000586790,ENST00000588740,ENST00000591578,ENST00000586864,ENST00000591241	NM_001193843,NM_013301,NM_001080334	CCDC106	1.19e-06	0	3	1	7.13e-05	FALSE
ENST00000354334,ENST00000080059,ENST00000470668,ENST00000548938,ENST00000459625,ENST00000548080,ENST00000549883,ENST00000552960,ENST00000477203,ENST00000380610,ENST00000547259,ENST00000427332,ENST00000471235,ENST00000488927,ENST00000477937,ENST00000491464,ENST00000463732,ENST00000485796,ENST00000425451,ENST00000430670,ENST00000422254,ENST00000440293,ENST00000447463,ENST00000434070,ENST00000421231…	NM_001031402,NM_015401,NM_001098416,NM_001193141	HDAC7	1.28e-06	3	16	2	1	FALSE
ENST00000392027,ENST00000474529,ENST00000485563	NM_001632	ALPP	1.45e-06	5	8	2	1	FALSE
ENST00000563783,ENST00000568509,ENST00000566371,ENST00000268704,ENST00000341316,ENST00000569363,ENST00000568151,ENST00000562775,ENST00000564047,ENST00000564409,ENST00000561945,ENST00000567138,ENST00000563218,ENST00000569820,ENST00000566221,ENST00000561911,ENST00000565370,ENST00000561702,ENST00000568205,ENST00000566682,ENST00000569720,ENST00000565891	NM_001012527,NM_199367,NM_003119,NM_001102022	SPG7	1.45e-06	4	8	2	1	FALSE
ENST00000370598,ENST00000238918,ENST00000546190	NM_001704	BAI3	1.45e-06	1	1	2	1	FALSE
ENST00000260665,ENST00000419884,ENST00000463456,ENST00000472420,ENST00000483489,ENST00000467058,ENST00000409946,ENST00000409659,ENST00000447246	NM_133259	LRPPRC	1.45e-06	5	11	2	1	FALSE
ENST00000486901,ENST00000374695,ENST00000481644,ENST00000469378,ENST00000426143,ENST00000471322,ENST00000374676,ENST00000453796,ENST00000430507,ENST00000493940,ENST00000427897,ENST00000498495,ENST00000480900,ENST00000412328,ENST00000374673,ENST00000439717	NM_001001876,NM_005529	HSPG2	1.45e-06	7	39	2	1	FALSE
ENST00000264560,ENST00000587219,ENST00000592870,ENST00000338448,ENST00000586055,ENST00000586776,ENST00000589012,ENST00000593172,ENST00000592155,ENST00000590161,ENST00000587513	NM_001167689,NM_001167690,NM_204892,NM_001040134,NM_002579,NM_001038636	PALM	1.45e-06	3	8	2	1	FALSE
ENST00000265843,ENST00000443411,ENST00000428840,ENST00000525344,ENST00000526312,ENST00000533052,ENST00000524840,ENST00000531386	NM_015065	EXPH5	1.45e-06	1	2	2	1	FALSE
ENST00000445403,ENST00000497734,ENST00000373578,ENST00000358208,ENST00000360723,ENST00000373567,ENST00000373558,ENST00000472968,ENST00000489153,ENST00000477066,ENST00000467556,ENST00000477475,ENST00000493775	NM_205457,NM_005417,NM_198291,NM_001110804,NM_001256800,NM_001261334	SRC	1.52e-06	1	6	2	1	FALSE
ENST00000292591,ENST00000337755,ENST00000518778,ENST00000519836,ENST00000520969,ENST00000522293,ENST00000518980,ENST00000522451,ENST00000523382,ENST00000520875,ENST00000518867,ENST00000518702,ENST00000520822,ENST00000523108,ENST00000521855,ENST00000520918,ENST00000521305,ENST00000523329,ENST00000518168,ENST00000520134,ENST00000519616,ENST00000520019,ENST00000519965	NM_014275,NM_054013,NM_001103261,NM_001266822	MGAT4B	1.58e-06	3	12	2	1	FALSE
ENST00000379066,ENST00000234179,ENST00000469275,ENST00000452104,ENST00000443977,ENST00000494667,ENST00000475912,ENST00000443187,ENST00000464552,ENST00000477132	NM_005813,NM_001205538,NM_001257548	PRKD3	1.68e-06	6	22	2	1	FALSE
ENST00000408189	NR_003078	SNORD110	1.68e-06	0	1	1	1	FALSE
ENST00000347215,ENST00000395816,ENST00000341744,ENST00000265626,ENST00000395814,ENST00000414037,ENST00000395819,ENST00000472841	NM_001031492,NM_199169,NM_199170,NM_020182,NM_199171,NM_001123203,NM_001078078,NM_001255976	PMEPA1	1.68e-06	4	18	2	1	FALSE
ENST00000424484,ENST00000418644,ENST00000455805,ENST00000458657,ENST00000441519,ENST00000357508,ENST00000535358,ENST00000445071,ENST00000453711,ENST00000421398,ENST00000444751,ENST00000434068,ENST00000434520,ENST00000427321,ENST00000446792,ENST00000444525,ENST00000440383,ENST00000427336,ENST00000418779,ENST00000568406	NM_001145636	C1orf228	1.8e-06	6	8	2	1	FALSE
ENST00000359139,ENST00000395741,ENST00000395744,ENST00000216061,ENST00000401672,ENST00000427222,ENST00000473283,ENST00000470046	NM_014678,NM_001206372,NM_001242898,NM_001242899,NM_001242900	PPP6R2	1.8e-06	1	22	2	0.0338528	FALSE
ENST00000298048,ENST00000538311,ENST00000536987,ENST00000536860,ENST00000545008,ENST00000495529,ENST00000489766,ENST00000536329,ENST00000541717,ENST00000543751,ENST00000487398,ENST00000480021	NM_001031509,NM_014791,NM_001111260,NM_001256689,NM_001256685,NM_001256687,NM_001256688,NM_001256690,NM_001256691,NM_001256692,NM_001256693,NR_046337	MELK	1.8e-06	0	7	1	0.0341787	FALSE
ENST00000251312,ENST00000590554,ENST00000590527,ENST00000394445,ENST00000491046,ENST00000593204,ENST00000585376,ENST00000586848	NM_204507,NM_001194811,NM_024308,NM_001035088,NM_001244532	DHRS11	1.97e-06	3	3	2	1	FALSE
ENST00000581484,ENST00000306739,ENST00000306729,ENST00000344865,ENST00000581647,ENST00000580534,ENST00000583503,ENST00000579684,ENST00000582019,ENST00000584454,ENST00000582355,ENST00000577733,ENST00000578236,ENST00000581608,ENST00000585274,ENST00000583744,ENST00000578361,ENST00000583142,ENST00000583693,ENST00000582404,ENST00000585140	NM_024083,NM_001104980,NM_001251888,NR_045351	ASPSCR1	1.97e-06	2	6	2	1	FALSE
ENST00000263253	NM_001429,NM_001244670,NM_001266486	EP300	1.97e-06	2	9	2	1	FALSE
ENST00000338791,ENST00000419067,ENST00000484496,ENST00000469328,ENST00000354269,ENST00000496200,ENST00000378717,ENST00000343214,ENST00000348127,ENST00000470772,ENST00000480861,ENST00000460045,ENST00000497868,ENST00000468842,ENST00000489263,ENST00000496487,ENST00000491376,ENST00000473463	NM_001142574,NM_001142575,NM_001142576,NM_000883,NM_183243,NM_001102605,NM_001142573,NM_001077841,NM_001249198	IMPDH1	1.97e-06	2	7	2	1	FALSE
ENST00000398160,ENST00000358932,ENST00000398169,ENST00000437553,ENST00000353689,ENST00000398163,ENST00000554184,ENST00000556854,ENST00000557665,ENST00000554047,ENST00000556563,ENST00000553291,ENST00000553516,ENST00000555348,ENST00000557114,ENST00000555963	NM_182852,NM_021178,NM_182849,NM_001046565	CCNB1IP1	1.97e-06	1	0	1	1	FALSE
ENST00000412278,ENST00000503028,ENST00000421355,ENST00000500635,ENST00000514361	NM_001198845,NM_001198846	RBM14-RBM4	1.97e-06	5	8	2	1	FALSE
ENST00000222330,ENST00000398249,ENST00000453535,ENST00000493059	NM_019884,NM_001102192,NM_001266636	GSK3A	1.97e-06	2	3	2	1	FALSE
ENST00000368321,ENST00000368320,ENST00000478002,ENST00000466520,ENST00000465953,ENST00000483237,ENST00000368319,ENST00000482337,ENST00000466713,ENST00000491599	NM_001031328,NM_014949,NM_001083456	KIAA0907	1.97e-06	5	9	2	1	FALSE
ENST00000516313,ENST00000408535,ENST00000517198,ENST00000517095	NR_002995	SNORA76	2.07e-06	0	1	1	1	FALSE
ENST00000264657,ENST00000585517,ENST00000462286,ENST00000389272,ENST00000588969,ENST00000491272,ENST00000404395,ENST00000462269,ENST00000471989,ENST00000498330,ENST00000478276,ENST00000585360,ENST00000588065,ENST00000590776	NM_001030931,NM_001131222,NM_139276,NM_003150,NM_213662,NM_001044580,NM_001012671	STAT3	2.21e-06	0	13	1	1	FALSE
ENST00000602348,ENST00000444583,ENST00000388955,ENST00000485741,ENST00000457352	NR_033323	NSUN5P2	2.44e-06	1	5	2	0.0405554	FALSE
ENST00000516595,ENST00000516956,ENST00000516520,ENST00000515981,ENST00000516133,ENST00000517114	NR_003013	SCARNA16	2.54e-06	1	2	2	1	FALSE
UNKNOWN	NR_024430	MIR100HG	2.54e-06	2	9	2	0.0410507	FALSE
ENST00000568363,ENST00000434411,ENST00000565256,ENST00000566583,ENST00000366365	NR_027058	LINC00338	2.54e-06	1	5	2	0.0404008	FALSE
ENST00000496939,ENST00000464527,ENST00000422269,ENST00000482548,ENST00000272298,ENST00000460218,ENST00000432899,ENST00000482532,ENST00000456319,ENST00000409563,ENST00000484408,ENST00000489742	NM_001098558,NM_001132771,NM_001743,NM_001009759,NM_001195640,NM_001198599,NM_001242587	CALM2	2.67e-06	3	6	2	1	FALSE
ENST00000265343,ENST00000378595,ENST00000478588,ENST00000425658,ENST00000378593,ENST00000477369,ENST00000491831,ENST00000465484,ENST00000421773	NM_001168765,NM_014423,NM_001191129,NM_001171499	AFF4	2.67e-06	2	6	2	0.0101707	FALSE
ENST00000300452,ENST00000372875,ENST00000461102	NM_016035,NM_001083672,NM_001180512	COQ4	2.67e-06	1	5	2	1	FALSE
ENST00000316292,ENST00000309268,ENST00000491404,ENST00000490569,ENST00000331523,ENST00000495333,ENST00000488500,ENST00000356303,ENST00000455918	NM_204157,NM_001195750,NM_001168941,NM_001009165,NM_001133439,NM_001402,NM_001197116,NM_001009326,NM_001081781,NM_001097418,NM_174535,NM_001082339,NM_001184809	EEF1A1	2.67e-06	5	5	2	1	FALSE
ENST00000587296,ENST00000544494,ENST00000380339,ENST00000393261,ENST00000587955	NM_032301,NM_001038151	FBXW9	2.67e-06	1	1	2	1	FALSE
ENST00000370192,ENST00000474241,ENST00000423006,ENST00000306031,ENST00000460019	NM_001132697,NM_001160301,NM_000110,NM_214044,NM_174041	DPYD	2.67e-06	3	18	2	1	FALSE
ENST00000340607,ENST00000481476	NM_001194983,NM_004878,NM_001122854,NM_001081935,NM_001038631,NM_174443,NM_001261168	PTGES	2.67e-06	1	1	2	1	FALSE
ENST00000448128,ENST00000245838,ENST00000441692,ENST00000492203,ENST00000419633,ENST00000497887,ENST00000432353,ENST00000455053,ENST00000355725,ENST00000416618,ENST00000491737,ENST00000464992,ENST00000496830,ENST00000464604,ENST00000464982,ENST00000438358,ENST00000459945,ENST00000472687,ENST00000464161,ENST00000433883,ENST00000419789	NM_001081550,NM_001206697,NM_001260621	THOC2	2.67e-06	2	4	2	1	FALSE
ENST00000534064,ENST00000433818,ENST00000535943,ENST00000533180,ENST00000531059,ENST00000525268,ENST00000525931,ENST00000529807,ENST00000534408,ENST00000524766,ENST00000527522	NM_033547,NM_001110065	INTS4	2.67e-06	2	3	2	1	FALSE
UNKNOWN	NR_029390	LOC284412	2.73e-06	0	7	1	1	FALSE
ENST00000530422	NR_002569	SCARNA9	2.94e-06	0	2	1	1	FALSE
ENST00000325212,ENST00000344196,ENST00000411936,ENST00000531622,ENST00000531877,ENST00000531700,ENST00000525446,ENST00000530425,ENST00000531404,ENST00000529185	NM_033395	KIAA1731	2.94e-06	0	5	1	1	FALSE
UNKNOWN	NR_015366,NR_027241	LOC388796	3.17e-06	9	17	2	1	FALSE
ENST00000439912,ENST00000364729	NR_002911	SNORA71A	3.17e-06	0	2	1	1	FALSE
ENST00000352480,ENST00000372394,ENST00000372393,ENST00000422569,ENST00000443588,ENST00000467695,ENST00000493984,ENST00000492400,ENST00000470849,ENST00000372386	NM_001013395,NM_001133340,NM_000050,NM_054012,NM_173892	ASS1	3.6e-06	13	34	2	1	FALSE
ENST00000366600,ENST00000477694,ENST00000462374,ENST00000478199,ENST00000313984,ENST00000494378,ENST00000461994	NM_152490,NM_001103343	B3GALNT2	3.6e-06	1	7	2	1	FALSE
ENST00000264724,ENST00000383737,ENST00000429422,ENST00000395734,ENST00000426837,ENST00000360240,ENST00000420772,ENST00000441748,ENST00000335271,ENST00000477765,ENST00000383736,ENST00000462206,ENST00000497735,ENST00000482752,ENST00000423088,ENST00000434267,ENST00000439356,ENST00000468075	NM_001133466,NM_002375,NM_001134364,NM_030885,NM_001164033,NM_174105,NM_001266271	MAP4	3.6e-06	4	13	2	1	FALSE
ENST00000377617,ENST00000389153,ENST00000389154,ENST00000550104,ENST00000483311,ENST00000484991,ENST00000482777,ENST00000542287,ENST00000535949,ENST00000475132,ENST00000550844,ENST00000468920,ENST00000551551,ENST00000550889,ENST00000495342,ENST00000551755,ENST00000552323,ENST00000492467,ENST00000546483,ENST00000550236,ENST00000392645,ENST00000481331,ENST00000471866,ENST00000549455,ENST00000548492	NM_002973	ATXN2	3.6e-06	3	13	2	1	FALSE
ENST00000328908,ENST00000491864,ENST00000440139,ENST00000483019,ENST00000397588,ENST00000472453,ENST00000449732,ENST00000343762,ENST00000469671	NR_026590,NM_001143970,NM_004824,NM_001143971,NM_001102223	CDYL	3.6e-06	2	8	2	1	FALSE
ENST00000420083,ENST00000318511,ENST00000449870,ENST00000587928,ENST00000407004,ENST00000589998,ENST00000589600,ENST00000589283,ENST00000590009,ENST00000593199,ENST00000587505,ENST00000589052,ENST00000250241,ENST00000590261,ENST00000588657,ENST00000592763,ENST00000587941,ENST00000587840,ENST00000589416,ENST00000585835,ENST00000589485,ENST00000589173,ENST00000593061,ENST00000590869,ENST00000591649…	NM_012218,NM_017620,NM_004516,NM_001137673,NM_153464,NM_001206495	ILF3	3.6e-06	2	9	2	1	FALSE
ENST00000397961,ENST00000349048,ENST00000496824,ENST00000466134,ENST00000491298,ENST00000403390,ENST00000474114,ENST00000498841,ENST00000460020,ENST00000467315,ENST00000460521,ENST00000495274	NM_001132791,NR_024108,NM_002626,NM_001080244	PFKL	3.6e-06	2	6	2	1	FALSE
ENST00000263200,ENST00000353891,ENST00000427926,ENST00000442042,ENST00000412649,ENST00000536806,ENST00000505027,ENST00000413132,ENST00000538828,ENST00000458188,ENST00000540896,ENST00000449918	NM_007098,NM_001835	CLTCL1	3.6e-06	11	22	2	1	FALSE
ENST00000303407,ENST00000473349,ENST00000371834,ENST00000357885,ENST00000494743,ENST00000371842,ENST00000433041	NM_001194118,NM_007371,NM_001076873	BRD3	3.6e-06	1	7	2	1	FALSE
ENST00000306329,ENST00000517570,ENST00000306285,ENST00000400050,ENST00000359865,ENST00000522146,ENST00000523122,ENST00000520495,ENST00000523811,ENST00000517554,ENST00000521018,ENST00000518815,ENST00000522592,ENST00000518226,ENST00000519823,ENST00000520926,ENST00000581670	NM_015210	SOGA2	3.6e-06	33	68	2	1	FALSE
ENST00000264933,ENST00000515587,ENST00000513582,ENST00000505221,ENST00000507528,ENST00000509581,ENST00000505526,ENST00000506909,ENST00000507473,ENST00000511482,ENST00000512466	NM_013232,NM_001105497,NM_001267556,NM_001267557,NM_001267558,NM_001267559	PDCD6	3.6e-06	3	17	2	1	FALSE
ENST00000436881	NM_001080482	C9orf172	3.6e-06	4	6	2	1	FALSE
ENST00000308249	NM_014906,NR_048561	PPM1E	3.62e-06	1	2	2	1	FALSE
ENST00000555449,ENST00000331299,ENST00000556444,ENST00000546428,ENST00000557611	NM_001131197,NM_030631,NM_001171170,NM_001015587,NM_001265644	SLC25A21	3.88e-06	0	5	1	1	FALSE
ENST00000404984,ENST00000402050,ENST00000415271,ENST00000470731,ENST00000438376,ENST00000325997,ENST00000476665,ENST00000325979,ENST00000423395,ENST00000422276,ENST00000497572,ENST00000427817,ENST00000490913,ENST00000423196,ENST00000486730	NM_001100390,NM_152558	IQCE	4.15e-06	0	6	1	1.32e-14	FALSE
ENST00000359543,ENST00000566033,ENST00000536829,ENST00000342147	NM_001105239,NM_001424,NM_001075324,NM_001265948	EMP2	4.15e-06	1	9	2	1	FALSE
ENST00000322764,ENST00000449630,ENST00000468083,ENST00000457235,ENST00000449423,ENST00000354434,ENST00000392910,ENST00000477373,ENST00000436448,ENST00000446634,ENST00000497119	NM_001004386,NM_001010972,NM_003461,NM_001078101,NM_001261048	ZYX	4.15e-06	1	6	2	1	FALSE
ENST00000217909,ENST00000336249,ENST00000488158,ENST00000493093,ENST00000495750,ENST00000484058	NM_145305	SLC25A43	4.21e-06	1	8	2	1	FALSE
ENST00000549554,ENST00000550574,ENST00000541364,ENST00000549818,ENST00000552448,ENST00000552125,ENST00000301072,ENST00000549183,ENST00000548470	NM_032704,NM_001034204	TUBA1C	4.45e-06	3	3	2	1	FALSE
ENST00000485080,ENST00000578469,ENST00000338854,ENST00000261646,ENST00000355815,ENST00000395751,ENST00000395757,ENST00000395756,ENST00000486311,ENST00000478616,ENST00000447641,ENST00000581707,ENST00000490796,ENST00000584760,ENST00000471445,ENST00000469356,ENST00000580540,ENST00000583080,ENST00000487401,ENST00000435530,ENST00000470247,ENST00000423161,ENST00000583732,ENST00000577897,ENST00000476994	NM_204126,NM_004176,NM_001005291,NM_001197083,NM_214157,NM_001113302	SREBF1	4.75e-06	14	31	2	1	FALSE
ENST00000401419,ENST00000397129,ENST00000404802,ENST00000429360,ENST00000341116,ENST00000404393,ENST00000485587,ENST00000397225	NM_001194752,NM_021126,NM_001130517,NM_001013436,NM_001034291,NM_001244324	MPST	4.75e-06	0	2	1	1	FALSE
ENST00000472851,ENST00000356607,ENST00000538836,ENST00000491661,ENST00000492696	NM_125676,NM_004565,NM_001080237,NM_001181018	PEX14	4.75e-06	0	10	1	0.0100758	FALSE
ENST00000318568,ENST00000394959,ENST00000337023,ENST00000380410,ENST00000398065	NR_027777,NR_027775,NR_027776	PMS2P5	4.88e-06	1	1	2	1	FALSE
ENST00000529047,ENST00000393955,ENST00000393958,ENST00000393960,ENST00000528224,ENST00000529352,ENST00000530259,ENST00000530187,ENST00000355677,ENST00000524491,ENST00000531614,ENST00000528403,ENST00000534194,ENST00000525476	NM_022172,NM_000920,NM_001040716,NM_214349,NM_177946,NM_001201434,NM_001261584	PC	4.88e-06	9	30	2	1	FALSE
ENST00000268138,ENST00000560985,ENST00000561095	NM_152259	TICRR	4.88e-06	2	7	2	1	FALSE
ENST00000461263,ENST00000315758,ENST00000443006,ENST00000461665,ENST00000432020,ENST00000490105,ENST00000492663,ENST00000424167	NM_001134205,NM_005918,NM_001195526,NM_001013587,NM_001183380,NM_001244153	MDH2	4.88e-06	3	5	2	1	FALSE
ENST00000370247,ENST00000370244,ENST00000260502,ENST00000539242,ENST00000370243,ENST00000538653,ENST00000466632,ENST00000490377,ENST00000479503,ENST00000469315	NM_003567,NM_001024483,NM_001261408,NM_001261409,NM_001261410	BCAR3	4.88e-06	2	33	2	1	FALSE
ENST00000439616,ENST00000443864,ENST00000449767,ENST00000447398,ENST00000419661,ENST00000444676,ENST00000222673,ENST00000543843,ENST00000459672,ENST00000497326	NM_001031382,NM_001131845,NM_001165036,NM_002541,NM_001003941,NM_001076030	OGDH	4.88e-06	13	31	2	1	FALSE
ENST00000268720,ENST00000525982,ENST00000319518,ENST00000532500,ENST00000529800,ENST00000568977,ENST00000566398,ENST00000526232,ENST00000564421	NM_014427,NM_153636,NM_001192413	CPNE7	4.88e-06	13	16	2	1	FALSE
ENST00000598742,ENST00000600467,ENST00000601492,ENST00000598466,ENST00000221975,ENST00000593863,ENST00000598261,ENST00000598399	NM_124103,NM_001132617,NM_001022,NM_001037467	RPS19	4.88e-06	3	11	2	1	FALSE
ENST00000561585,ENST00000561958,ENST00000263346,ENST00000563032,ENST00000565196,ENST00000564652,ENST00000568412,ENST00000563406,ENST00000565404,ENST00000566751,ENST00000562256,ENST00000263347,ENST00000568409,ENST00000568870,ENST00000562184,ENST00000563636,ENST00000570116,ENST00000566158,ENST00000562193,ENST00000563484,ENST00000566283,ENST00000567171,ENST00000564957,ENST00000565860	NM_014972,NM_001099177	TCF25	4.88e-06	2	8	2	1	FALSE
ENST00000373233,ENST00000480022,ENST00000440697,ENST00000309279,ENST00000476641,ENST00000373222,ENST00000470470,ENST00000482596,ENST00000440647	NM_032221,NM_001243300	CHD6	5.46e-06	0	13	1	1	FALSE
ENST00000371882,ENST00000545703,ENST00000262820,ENST00000539496,ENST00000540167,ENST00000541812,ENST00000447671,ENST00000371878,ENST00000371876,ENST00000469946,ENST00000453826	NM_001031116,NM_033495,NM_001168301,NM_001168299,NM_001168302,NM_001168300,NM_001168303,NM_001102511	KLHL13	5.46e-06	3	21	2	1	FALSE
ENST00000262244	NM_024761,NM_001046491,NM_001261049	MOB3B	5.46e-06	0	5	1	1	FALSE
ENST00000258742,ENST00000485250,ENST00000438012,ENST00000410002,ENST00000497500,ENST00000487595,ENST00000413919,ENST00000437140,ENST00000486136,ENST00000477844,ENST00000489145	NM_001030984,NM_001132082,NM_007342,NM_001077923,NM_001266179	NUPL2	5.46e-06	1	4	2	1	FALSE
ENST00000367078,ENST00000492730,ENST00000452902,ENST00000243611,ENST00000367076,ENST00000391923,ENST00000451804,ENST00000469326,ENST00000470767	NM_001017364,NM_001017367,NM_001017365,NM_000716,NM_001017366,NM_174253	C4BPB	5.46e-06	7	11	2	1	FALSE
ENST00000222345,ENST00000599644,ENST00000476317,ENST00000595982,ENST00000595384,ENST00000601222,ENST00000594553,ENST00000601881,ENST00000600919,ENST00000595495,ENST00000601054,ENST00000596403	NM_015073	SIPA1L3	5.84e-06	0	17	1	1	FALSE
ENST00000361905,ENST00000527636,ENST00000527376,ENST00000334310,ENST00000527575,ENST00000361985,ENST00000525312,ENST00000526600	NM_001199405,NM_021961	TEAD1	5.84e-06	17	106	2	1	FALSE
ENST00000400754,ENST00000416067,ENST00000559466	NR_038327,NR_038328,NR_038329	TEKT4P2	5.84e-06	1	19	2	1	FALSE
ENST00000600027,ENST00000599167,ENST00000270625,ENST00000602252,ENST00000596873,ENST00000594493,ENST00000601216,ENST00000599561,ENST00000601306	NM_001030833,NM_001195754,NM_001015,NM_001024568,NM_001244070,NM_001250039	RPS11	5.84e-06	1	5	2	1	FALSE
ENST00000500728,ENST00000296325,ENST00000515119,ENST00000509198	NM_205062,NM_001131664,NM_002337,NM_001113436,NM_001080225,NM_001246391	LRPAP1	6.59e-06	4	13	2	1	FALSE
ENST00000519397,ENST00000487455,ENST00000479668,ENST00000540729,ENST00000444957,ENST00000397281,ENST00000466559,ENST00000489432,ENST00000475514,ENST00000473391,ENST00000482680,ENST00000488943,ENST00000495535,ENST00000467980,ENST00000469309,ENST00000518514,ENST00000522266,ENST00000518462,ENST00000486714,ENST00000425389	NM_013400,NM_014374,NM_001099695,NM_001099696,NM_001075521	REPIN1	6.59e-06	4	4	2	1	FALSE
ENST00000331134,ENST00000572760,ENST00000574964,ENST00000572346,ENST00000573519,ENST00000573876,ENST00000571714,ENST00000572824,ENST00000573212,ENST00000374747,ENST00000576940,ENST00000539314,ENST00000574897,ENST00000576713,ENST00000572351,ENST00000570324,ENST00000573328,ENST00000574344,ENST00000570300,ENST00000571562,ENST00000574095	NM_017921,NM_001192189	NPLOC4	6.59e-06	2	10	2	1	FALSE
ENST00000421351	NM_022121,NM_001034350,NM_001244825	PERP	6.59e-06	1	1	2	1	FALSE
ENST00000308191,ENST00000446774	NM_018945,NM_001102068	PDE7B	6.59e-06	6	46	2	1	FALSE
ENST00000369980,ENST00000369974,ENST00000393682,ENST00000444230,ENST00000477274,ENST00000455690,ENST00000369973,ENST00000444254,ENST00000437278,ENST00000429936,ENST00000393687,ENST00000443220,ENST00000467236,ENST00000463031	NM_001569,NM_001025242,NM_001025243,NM_001040555	IRAK1	6.59e-06	1	3	2	1	FALSE
UNKNOWN	NR_073170,NR_073171,NR_073172	LOC101055625	6.59e-06	2	1	2	1	FALSE
ENST00000361320,ENST00000485868,ENST00000472278	NM_001199545,NM_178011,NM_001103283,NM_001266575	LRRTM3	6.59e-06	1	1	2	1	FALSE
ENST00000433211,ENST00000373744,ENST00000373735,ENST00000494580,ENST00000545309,ENST00000330298	NM_001199536,NM_001127384,NM_013266,NM_001079638	CTNNA3	6.59e-06	1	2	2	1	FALSE
ENST00000318445,ENST00000553653,ENST00000424469,ENST00000555111,ENST00000553304,ENST00000555769,ENST00000556649,ENST00000555549,ENST00000555892,ENST00000555210,ENST00000555439,ENST00000555513,ENST00000564072,ENST00000566477	NM_001145044,NM_013272,NM_001001134,NM_001261477	SLCO3A1	6.59e-06	38	148	2	1	FALSE
ENST00000400913,ENST00000340850,ENST00000377748,ENST00000489097,ENST00000377740,ENST00000400915,ENST00000377732,ENST00000377728,ENST00000377725,ENST00000487949,ENST00000377737,ENST00000535355,ENST00000537245,ENST00000544978	NM_198681,NM_001042664,NM_001042663,NM_001042665,NM_020631,NM_001265592,NM_001265593,NM_001265594	PLEKHG5	6.59e-06	2	11	2	1	FALSE
ENST00000441493,ENST00000252134,ENST00000580469,ENST00000577821,ENST00000579997,ENST00000584751,ENST00000498573,ENST00000578984,ENST00000400561,ENST00000444520,ENST00000495076,ENST00000414725,ENST00000578905,ENST00000383094,ENST00000207726,ENST00000429452,ENST00000461307,ENST00000585038,ENST00000462645,ENST00000465886,ENST00000498345,ENST00000424046	NM_015241,NM_001136004,NM_001122731	MICAL3	6.59e-06	4	29	2	1	FALSE
UNKNOWN	NM_145253,NM_001076951	FAM100A	6.59e-06	1	3	2	1	FALSE
ENST00000533752,ENST00000333090,ENST00000525167,ENST00000527881	NM_001005346,NM_015516,NM_001103268,NM_001258210	TSKU	6.59e-06	6	15	2	1	FALSE
ENST00000378980,ENST00000351266,ENST00000417345	NM_205028,NM_001842,NM_147164,NM_001003353,NM_001207011,NM_001257683	CNTFR	6.59e-06	1	4	2	0.04533	FALSE
ENST00000367604,ENST00000367603,ENST00000012134,ENST00000474532	NM_006734	HIVEP2	6.59e-06	2	9	2	1	FALSE
ENST00000536642,ENST00000309366,ENST00000541388,ENST00000449942,ENST00000535135,ENST00000394540	NM_004470,NM_057092,NM_001135208,NM_001037481,NM_001113256,NM_001266815	FKBP2	6.59e-06	3	0	1	5.66e-38	FALSE
ENST00000324545,ENST00000378308,ENST00000453805,ENST00000467173,ENST00000465386,ENST00000463829,ENST00000462850,ENST00000487625,ENST00000485180	NM_001039590,NM_001039591	USP9X	7.19e-06	0	9	1	1	FALSE
ENST00000492461	NR_046648	HLTF-AS1	7.19e-06	0	1	1	1	FALSE
ENST00000334928,ENST00000585737,ENST00000591809,ENST00000586599,ENST00000587676	NM_152657	GGN	7.19e-06	0	2	1	9.34e-12	FALSE
ENST00000580578,ENST00000167462,ENST00000375227,ENST00000392550,ENST00000578363,ENST00000579392,ENST00000577200,ENST00000578536,ENST00000580925,ENST00000581713,ENST00000583658,ENST00000545227,ENST00000582860,ENST00000580027,ENST00000578638,ENST00000577500,ENST00000578719,ENST00000579092,ENST00000583514,ENST00000582393,ENST00000578034,ENST00000577211	NM_001133808,NM_004524,NM_001015002,NM_001031803,NM_001099098	LLGL2	7.7e-06	1	8	2	1	FALSE
ENST00000380815,ENST00000530927,ENST00000486793,ENST00000467288,ENST00000476972,ENST00000380805,ENST00000533279,ENST00000531690,ENST00000530459,ENST00000530075	NM_001500,NM_001080331,NM_001253846,NM_001266789	GMDS	7.7e-06	5	32	2	1	FALSE
ENST00000362803	NR_002440	SNORD16	8.23e-06	0	2	1	1	FALSE
ENST00000307961,ENST00000567229,ENST00000568588,ENST00000565723,ENST00000561775,ENST00000569696,ENST00000564744,ENST00000564647,ENST00000563473,ENST00000566039,ENST00000564439,ENST00000566622,ENST00000569438,ENST00000566624,ENST00000561554,ENST00000566491,ENST00000564517	NM_100606,NM_179273,NM_001035909,NM_001035908,NM_001007479,NM_001131753,NM_000968,NM_001014894,NM_001252409,NM_001266200	RPL4	8.23e-06	0	5	1	1	FALSE
ENST00000524630,ENST00000399039,ENST00000529919,ENST00000533189,ENST00000361796,ENST00000360682,ENST00000532245,ENST00000415361,ENST00000530094,ENST00000526357,ENST00000532844,ENST00000525902,ENST00000529873,ENST00000526772,ENST00000531014,ENST00000528232,ENST00000527467,ENST00000428599,ENST00000530748,ENST00000528621,ENST00000532649,ENST00000533667,ENST00000532787,ENST00000358694,ENST00000529986…	NM_001132270,NM_001085464,NM_001085467,NM_001085458,NM_001085459,NM_001331,NM_001085460,NM_001085461,NM_001085462,NM_001085463,NM_001085465,NM_001085466,NM_001085468,NM_001085469,NM_001192402,NM_001206884,NM_001206883,NM_001206885,NM_001206886,NM_001206887,NM_001206888,NM_001206889,NM_001206890,NM_001206891,NM_001266516	CTNND1	8.23e-06	2	13	2	1	FALSE
ENST00000528395	NR_037646	TMX2-CTNND1	8.23e-06	4	19	2	1	FALSE
ENST00000453654,ENST00000494390,ENST00000424189,ENST00000446122,ENST00000288490,ENST00000477835,ENST00000486153,ENST00000497321,ENST00000460662,ENST00000470895,ENST00000483619,ENST00000475388	NM_004717	DGKI	8.23e-06	1	25	2	1	FALSE
ENST00000322644,ENST00000572844,ENST00000576952,ENST00000575547,ENST00000576114,ENST00000576718,ENST00000574158,ENST00000573603,ENST00000576553	NM_000937,NM_001206313	POLR2A	8.77e-06	0	5	1	1	FALSE
ENST00000423485,ENST00000577541,ENST00000578412,ENST00000577706,ENST00000581055	NM_204791,NM_001067	TOP2A	8.77e-06	0	6	1	1	FALSE
ENST00000328771,ENST00000471451,ENST00000486327,ENST00000460681	NM_014681,NM_001192124	DHX34	8.77e-06	1	4	2	1	FALSE
ENST00000533616,ENST00000532456,ENST00000534761,ENST00000539648,ENST00000528499,ENST00000529701,ENST00000526330,ENST00000534001,ENST00000527702,ENST00000534582,ENST00000529235,ENST00000533713,ENST00000533618,ENST00000533195,ENST00000530132,ENST00000533532,ENST00000263574,ENST00000345598,ENST00000338167,ENST00000543137,ENST00000278756,ENST00000461918,ENST00000525215,ENST00000529483,ENST00000533860…	NM_001006317,NR_024515,NR_024516,NM_001642,NM_001142277,NM_001142278,NM_001142276,NM_001135961,NM_001243299	APLP2	8.77e-06	1	9	2	1	FALSE
ENST00000318407	NM_204706,NM_032515,NM_001098868,NM_001266922	BOK	8.9e-06	2	1	2	1	FALSE
ENST00000301030,ENST00000378330,ENST00000330736,ENST00000562194,ENST00000564736,ENST00000568100,ENST00000378332,ENST00000562275,ENST00000564553,ENST00000562816,ENST00000567736,ENST00000568924,ENST00000563291,ENST00000566858,ENST00000567699,ENST00000568512,ENST00000566973	NM_013275,NM_001256182,NM_001256183,NR_045839	ANKRD11	8.9e-06	7	32	2	1	FALSE
ENST00000328631,ENST00000479914,ENST00000491686,ENST00000449563,ENST00000413654,ENST00000443853,ENST00000437427,ENST00000412850,ENST00000454335,ENST00000340879,ENST00000432678,ENST00000433104,ENST00000416707,ENST00000431721,ENST00000449610,ENST00000413298,ENST00000450045,ENST00000446860,ENST00000455545,ENST00000412795,ENST00000417896,ENST00000443964,ENST00000436134,ENST00000453202,ENST00000440424…	NM_001030596,NM_016291,NM_001005909,NM_001005910,NM_001005911,NM_001146178,NM_001146179,NR_027437,NR_027438,NM_001190316,NM_001190317,NM_001034317,NM_001082377	IP6K2	8.9e-06	3	5	2	1	FALSE
ENST00000490683,ENST00000427436,ENST00000458124,ENST00000454876,ENST00000360861,ENST00000416216,ENST00000428884,ENST00000435095,ENST00000484191,ENST00000452775,ENST00000452151	NM_001030600,NM_003043,NM_001134368,NM_001134367,NM_001003311,NM_174610,NM_001266893	SLC6A6	8.9e-06	1	9	2	1	FALSE
ENST00000263377,ENST00000594066,ENST00000371835,ENST00000360016,ENST00000595926,ENST00000594841,ENST00000602230,ENST00000594842,ENST00000597315,ENST00000601071,ENST00000601941	NM_202334,NM_001031588,NM_014299,NM_058243,NM_001204772	BRD4	8.9e-06	7	14	2	1	FALSE
ENST00000503278,ENST00000508423,ENST00000425103,ENST00000307659,ENST00000503069	NM_001193917,NM_014743,NM_001100590	KIAA0232	8.9e-06	2	7	2	1	FALSE
ENST00000543245,ENST00000356839,ENST00000322910,ENST00000583312,ENST00000582356,ENST00000350303,ENST00000579286,ENST00000578269,ENST00000577857,ENST00000582056,ENST00000580263,ENST00000584103,ENST00000577191,ENST00000578421,ENST00000581562,ENST00000579886,ENST00000577433,ENST00000582166,ENST00000580365,ENST00000581378,ENST00000583760,ENST00000582379,ENST00000578824,ENST00000583858,ENST00000585203…	NM_001033859,NM_000018,NM_174494,NM_001270447,NM_001270448	ACADVL	8.9e-06	1	12	2	1	FALSE
ENST00000424649,ENST00000228307,ENST00000458477,ENST00000397506,ENST00000267257,ENST00000536957,ENST00000323871,ENST00000538144,ENST00000550795,ENST00000547983,ENST00000551327,ENST00000543331,ENST00000546532,ENST00000548912,ENST00000552550,ENST00000440827,ENST00000547746,ENST00000540221,ENST00000550205,ENST00000547772	NM_204984,NM_001132860,NM_001080855,NM_002859,NM_025157,NM_001243756	PXN	8.9e-06	9	20	2	1	FALSE
ENST00000313050,ENST00000371706,ENST00000453963,ENST00000277537,ENST00000467838,ENST00000313084,ENST00000431893,ENST00000290037,ENST00000398335,ENST00000472305	NM_014866	SEC16A	8.9e-06	2	4	2	1	FALSE
ENST00000262395,ENST00000478021,ENST00000461195,ENST00000498540,ENST00000422344,ENST00000586813,ENST00000444415,ENST00000394925,ENST00000262396,ENST00000475329,ENST00000584944,ENST00000473421,ENST00000454852,ENST00000578917,ENST00000469529,ENST00000580073	NM_004295,NM_001101280	TRAF4	8.9e-06	3	10	2	1	FALSE
UNKNOWN	NM_001115017,NM_001159411,NM_001199980,NM_031454,NM_001137603,NM_001201431,NM_001163193,NM_001199783	SELO	8.9e-06	3	6	2	1	FALSE
UNKNOWN	NR_004384	SNAR-F	8.98e-06	1	2	2	1	FALSE
ENST00000398863,ENST00000356093,ENST00000343067,ENST00000482464,ENST00000349460,ENST00000373800,ENST00000347529,ENST00000373798,ENST00000373797,ENST00000488277,ENST00000490308,ENST00000460378,ENST00000462032	NM_001168004,NM_001166006,NM_001166005,NM_203343,NM_203342,NM_001166007,NM_004437,NM_001003362,NM_174311	EPB41	9.39e-06	1	14	2	1	FALSE
ENST00000593829,ENST00000252816,ENST00000600289,ENST00000594828,ENST00000597776,ENST00000593564	NM_012321,NM_001110805,NM_001035436,NM_001179002,NM_001245518,NM_001252129,NM_001260573	LSM4	9.39e-06	2	2	2	1	FALSE
ENST00000340622,ENST00000458143,ENST00000471735,ENST00000461958	NM_152557,NM_001163474,NM_001035341	ZNF746	9.39e-06	0	2	1	1	FALSE
ENST00000294309,ENST00000535009,ENST00000542467,ENST00000534832,ENST00000442692	NM_139075,NM_001192451	TPCN2	1e-05	5	12	2	1	FALSE
ENST00000263713,ENST00000443902,ENST00000331393,ENST00000443124,ENST00000452780,ENST00000466241,ENST00000489017,ENST00000461128,ENST00000495030,ENST00000488691	NM_001184937,NM_001184939,NM_020909,NM_001184938,NM_001002952,NM_001035384	EPB41L5	1e-05	0	4	1	5.15e-05	FALSE
ENST00000513000,ENST00000262992,ENST00000308502,ENST00000508116,ENST00000509777,ENST00000511838,ENST00000512630,ENST00000510812,ENST00000514525,ENST00000506297,ENST00000507462,ENST00000506217,ENST00000506788,ENST00000506517,ENST00000506000,ENST00000504632,ENST00000506243,ENST00000507861,ENST00000503927,ENST00000514964,ENST00000505483,ENST00000512489,ENST00000508084	NM_001133836,NM_003866,NM_001101669	INPP4B	1e-05	0	11	1	1	FALSE
ENST00000437615	NR_026781	LINC00242	1e-05	0	1	1	1	FALSE
ENST00000420557	NR_026780	LINC00574	1e-05	0	1	1	1	FALSE
ENST00000265140,ENST00000508130,ENST00000508383,ENST00000504099,ENST00000466957,ENST00000450932,ENST00000475916,ENST00000493934	NM_032290,NM_001102058	ANKRD32	1e-05	0	7	1	1	FALSE
ENST00000588168,ENST00000591147,ENST00000589222,ENST00000591371,ENST00000593004,ENST00000589916,ENST00000407086,ENST00000588532,ENST00000592848,ENST00000390652,ENST00000586241,ENST00000592393,ENST00000408905,ENST00000588462,ENST00000586705,ENST00000588874,ENST00000585744,ENST00000590128,ENST00000586484,ENST00000586041,ENST00000590352,ENST00000587037,ENST00000585979,ENST00000592827,ENST00000587002…	NM_017679,NM_001099432	BCAS3	1e-05	0	11	1	1	FALSE
ENST00000543351,ENST00000298468,ENST00000344036,ENST00000332211,ENST00000472137,ENST00000470745,ENST00000475142,ENST00000481876,ENST00000535553,ENST00000313132,ENST00000498394,ENST00000468285,ENST00000447677,ENST00000413289,ENST00000460044	NM_204741,NR_033675,NM_001184783,NM_003375,NM_001184823,NM_214369,NM_174486,NM_001082718,NM_126150,NM_001203712,NM_001257424	VDAC2	1e-05	0	4	1	1	FALSE
ENST00000420034,ENST00000372842,ENST00000447915,ENST00000420512,ENST00000372838,ENST00000411852,ENST00000493788,ENST00000483737,ENST00000463535,ENST00000483893,ENST00000487001,ENST00000472858	NM_016174,NM_001102035	CERCAM	1.04e-05	1	2	2	1	FALSE
ENST00000600213	NM_001190470	MTRNR2L2	1.07e-05	3	3	2	1	FALSE
ENST00000391322,ENST00000516427,ENST00000390885,ENST00000391256,ENST00000391215,ENST00000390922,ENST00000391306,ENST00000391286,ENST00000391188,ENST00000391288,ENST00000391119	NR_003016	SNORA26	1.1e-05	1	1	2	1	FALSE
ENST00000545932,ENST00000311893,ENST00000547005,ENST00000431221,ENST00000535729,ENST00000552072,ENST00000338291,ENST00000392807,ENST00000539580,ENST00000539593,ENST00000535405,ENST00000544493,ENST00000540154,ENST00000538193	NM_014301,NM_213595,NM_001075683,NM_001261474	ISCU	1.2e-05	1	1	2	1	FALSE
ENST00000360265,ENST00000358461,ENST00000420658,ENST00000505447,ENST00000513842,ENST00000382543,ENST00000508415,ENST00000513856	NM_204205,NM_001134648,NM_198595,NM_001134647,NM_001206044,NM_001253821	AFAP1	1.2e-05	18	58	2	1	FALSE
ENST00000279550,ENST00000228251,ENST00000540447,ENST00000540975,ENST00000546164,ENST00000536823,ENST00000366286,ENST00000542002,ENST00000366290,ENST00000542641,ENST00000541351,ENST00000544504,ENST00000539204,ENST00000544622,ENST00000546298,ENST00000544501,ENST00000536107,ENST00000540747	NM_205406,NM_003651,NM_001145426,NM_001003127,NM_001098074	CSDA	1.2e-05	3	6	2	1	FALSE
ENST00000445470,ENST00000222482,ENST00000492072,ENST00000474254,ENST00000470542,ENST00000497388,ENST00000493259,ENST00000473956,ENST00000490117,ENST00000486598,ENST00000488025	NM_001163446,NM_016352	CPA4	1.2e-05	1	1	2	1	FALSE
ENST00000538780,ENST00000543653,ENST00000358906	NM_001194323,NM_032829	FAM222A	1.2e-05	1	1	2	1	FALSE
ENST00000515489,ENST00000394235,ENST00000379549,ENST00000265495,ENST00000379550,ENST00000358635,ENST00000510408,ENST00000420916,ENST00000512627,ENST00000514577,ENST00000504314,ENST00000514606,ENST00000511184,ENST00000511006	NM_006874,NM_201999,NM_001191138	ELF2	1.2e-05	1	3	2	1	FALSE
ENST00000378723,ENST00000358062,ENST00000541735,ENST00000378707,ENST00000343523,ENST00000359836,ENST00000357033,ENST00000378677,ENST00000378702,ENST00000474231,ENST00000465285,ENST00000361471,ENST00000378680,ENST00000378705,ENST00000475732,ENST00000469142,ENST00000445312,ENST00000471779,ENST00000488902,ENST00000493412,ENST00000448370,ENST00000420596,ENST00000288447,ENST00000480751,ENST00000447523…	NM_205299,NM_001132294,NM_004009,NM_004010,NM_004011,NM_004012,NM_004014,NM_004007,NM_004013,NM_004019,NM_004015,NM_004016,NM_004017,NM_004018,NM_004021,NM_004022,NM_004023,NM_004020,NM_000109,NM_004006,NM_001003343,NM_001012408,NM_001110084	DMD	1.2e-05	1	13	2	1	FALSE
ENST00000461628,ENST00000379613,ENST00000379604,ENST00000489805,ENST00000319516,ENST00000488193,ENST00000379608,ENST00000482890,ENST00000466073,ENST00000497266,ENST00000475264,ENST00000478375,ENST00000498450,ENST00000490875,ENST00000473652,ENST00000474952,ENST00000462727,ENST00000464323,ENST00000465858,ENST00000486038	NM_205094,NM_003220,NM_001032280,NM_001042425,NM_001080228,NM_001009745	TFAP2A	1.2e-05	4	9	2	1	FALSE
ENST00000541723,ENST00000541460,ENST00000536474	NR_026661,NR_026662	FAM222A-AS1	1.2e-05	1	1	2	1	FALSE
ENST00000272638,ENST00000415164,ENST00000426921,ENST00000416538,ENST00000467065,ENST00000470687,ENST00000490163,ENST00000471246	NM_001133490,NM_014607,NM_001035414,NM_001246510	UBXN4	1.2e-05	1	4	2	1	FALSE
ENST00000523430,ENST00000265896,ENST00000521232,ENST00000518931,ENST00000520493,ENST00000518604	NM_001194927,NM_001101026,NM_001098061,NM_001104929,NM_003129	SQLE	1.2e-05	1	1	2	1	FALSE
ENST00000399914,ENST00000399913,ENST00000389125,ENST00000327783,ENST00000535441,ENST00000389124,ENST00000399909,ENST00000399907,ENST00000309434,ENST00000472429	NM_001194856,NM_001164702,NM_000830,NM_175611,NM_001102514,NM_001035734,NM_114393,NM_001203084	GRIK1	1.2e-05	1	4	2	1	FALSE
ENST00000379996,ENST00000379989,ENST00000463994	NM_003159,NM_001037343	CDKL5	1.2e-05	1	11	2	1	FALSE
ENST00000455756,ENST00000418177,ENST00000305447,ENST00000305432,ENST00000393297,ENST00000449371,ENST00000393294	NM_204138,NM_000842,NM_001143831	GRM5	1.2e-05	1	2	2	1	FALSE
ENST00000340635,ENST00000507116,ENST00000360047,ENST00000358923,ENST00000317118,ENST00000503258,ENST00000405755,ENST00000515011,ENST00000502484,ENST00000546160,ENST00000309641,ENST00000505453,ENST00000405053,ENST00000502575,ENST00000503947,ENST00000515324,ENST00000514231,ENST00000512069,ENST00000509368,ENST00000509355,ENST00000504624,ENST00000506024,ENST00000506510,ENST00000511382,ENST00000505507…	NM_001197218,NM_001197219,NM_001197220,NM_001197221,NM_001197222,NM_001197223,NM_001165899,NM_006203,NM_001104631,NM_001242504	PDE4D	1.2e-05	9	76	2	1	FALSE
ENST00000367265,ENST00000367264,ENST00000472822,ENST00000491153,ENST00000235790,ENST00000498276,ENST00000456180,ENST00000602511,ENST00000470573,ENST00000467487	NM_001031029,NM_006618	KDM5B	1.2e-05	1	4	2	1	FALSE
ENST00000477087,ENST00000228872,ENST00000396340,ENST00000442489	NM_204256,NM_004064,NM_001002957,NM_001009870,NM_214316,NM_001100346,NM_001261005	CDKN1B	1.22e-05	0	6	1	2.58e-12	FALSE
ENST00000202556,ENST00000557587,ENST00000423488,ENST00000556597,ENST00000555825,ENST00000557082,ENST00000555391,ENST00000556334,ENST00000554432,ENST00000556325,ENST00000555991,ENST00000557744,ENST00000555183,ENST00000555708,ENST00000554106,ENST00000555734,ENST00000554136,ENST00000553739	NM_015316	PPP1R13B	1.31e-05	0	8	1	1	FALSE
ENST00000409074,ENST00000440963,ENST00000458117,ENST00000489117,ENST00000495778,ENST00000492189,ENST00000477116,ENST00000473127,ENST00000497901,ENST00000476323,ENST00000555660,ENST00000474271,ENST00000557079	NM_032374,NM_001076459	APOPT1	1.4e-05	1	2	2	1	FALSE
ENST00000321358,ENST00000332220,ENST00000436427,ENST00000467957	NM_204414,NM_004559,NM_174815,NM_001093786,NM_001082785	YBX1	1.4e-05	0	5	1	1	FALSE
ENST00000417582,ENST00000252577,ENST00000360315,ENST00000537887,ENST00000494516,ENST00000457895,ENST00000448576,ENST00000432704,ENST00000404158,ENST00000429242,ENST00000358713,ENST00000444839,ENST00000429563,ENST00000473184,ENST00000418032	NM_001012552,NM_017660,NM_001103090	GATAD2A	1.4e-05	6	34	2	1	FALSE
ENST00000372870,ENST00000300456	NM_001131490,NM_005094,NM_001075667	SLC27A4	1.4e-05	0	7	1	2.14e-09	FALSE
ENST00000516890,ENST00000362423	NR_002576	SNORA21	1.41e-05	0	2	1	1	FALSE
ENST00000322147,ENST00000529582,ENST00000301873,ENST00000530785,ENST00000529189,ENST00000532932,ENST00000528516,ENST00000526927,ENST00000536982,ENST00000532661,ENST00000529371,ENST00000530866,ENST00000526124,ENST00000530990,ENST00000525443,ENST00000527339,ENST00000528966,ENST00000529764,ENST00000527792,ENST00000526825,ENST00000530426,ENST00000524798	NM_021070,NM_001130144,NM_001164266,NM_001192738	LTBP3	1.42e-05	8	11	2	1	FALSE
ENST00000375244,ENST00000375247,ENST00000490077,ENST00000451343,ENST00000498094,ENST00000479795,ENST00000486148,ENST00000442721,ENST00000433037,ENST00000549232,ENST00000383159,ENST00000489006,ENST00000404514,ENST00000488475,ENST00000495543,ENST00000424226,ENST00000448391,ENST00000550212,ENST00000440248,ENST00000469250,ENST00000426348,ENST00000496456,ENST00000487885,ENST00000478957,ENST00000427181…	NM_019105,NM_032470,NM_174703	TNXB	1.49e-05	0	4	1	0.0388916	FALSE
ENST00000429806,ENST00000295802,ENST00000263854,ENST00000449375,ENST00000438611,ENST00000457495,ENST00000475624,ENST00000409984,ENST00000482694,ENST00000490291	NM_017750,NM_001102279,NM_001257563	RETSAT	1.49e-05	0	3	1	1.12e-20	FALSE
ENST00000328252,ENST00000534838,ENST00000460463,ENST00000483254	NM_002581	PAPPA	1.49e-05	0	6	1	5.16e-07	FALSE
ENST00000384584,ENST00000517031	NR_002976	SNORA44	1.6e-05	2	2	2	1	FALSE
ENST00000212355,ENST00000533089,ENST00000370399,ENST00000525962,ENST00000532540,ENST00000465892,ENST00000470600,ENST00000529608,ENST00000468996,ENST00000417833,ENST00000533370	NM_204339,NM_001159786,NR_036634,NM_001195684,NM_003243,NM_001195683,NM_214272	TGFBR3	1.61e-05	2	20	2	1	FALSE
ENST00000469733,ENST00000400919,ENST00000414253,ENST00000428120,ENST00000400918,ENST00000487186,ENST00000401813,ENST00000378546,ENST00000378543,ENST00000378545,ENST00000476803,ENST00000440825,ENST00000420515,ENST00000497675,ENST00000514625	NM_182533,NM_001146310,NM_001256945,NM_001256946,NM_001256947,NR_046424,NR_046425,NR_046426,NR_046427	C1orf86	1.61e-05	1	4	2	1	FALSE
ENST00000490097,ENST00000463381,ENST00000397238,ENST00000479901,ENST00000473312,ENST00000469901,ENST00000476375,ENST00000492234,ENST00000335367,ENST00000473140,ENST00000490839,ENST00000467724,ENST00000468796,ENST00000480106,ENST00000498559,ENST00000486946,ENST00000475145,ENST00000463179,ENST00000485904,ENST00000494808,ENST00000478320,ENST00000483971,ENST00000461065,ENST00000467250,ENST00000473633	NM_001042535,NM_031946	AGAP3	1.61e-05	10	25	2	1	FALSE
ENST00000377967,ENST00000382899,ENST00000536777,ENST00000543216,ENST00000475233,ENST00000451692,ENST00000414389,ENST00000433797,ENST00000485072,ENST00000484732,ENST00000431196,ENST00000479423	NM_021140,NM_001197185,NM_001197186,NM_001206575	KDM6A	1.61e-05	3	20	2	1	FALSE
ENST00000228862,ENST00000298573,ENST00000545864,ENST00000539940,ENST00000541207,ENST00000536236	NM_030640	DUSP16	1.61e-05	9	28	2	0.014359	FALSE
ENST00000345617,ENST00000543185,ENST00000430200,ENST00000494800,ENST00000487617,ENST00000463007,ENST00000495497,ENST00000541256,ENST00000493582,ENST00000535493,ENST00000460235,ENST00000461113,ENST00000445704,ENST00000553145,ENST00000454542,ENST00000446876,ENST00000496347,ENST00000544989	NM_204313,NM_006037,NM_001014736,NM_132640,NM_167356,NM_001258722	HDAC4	1.61e-05	18	75	2	1	FALSE
ENST00000252674,ENST00000585588	NM_005934	MLLT1	1.61e-05	6	9	2	1	FALSE
ENST00000384027	NR_002434	SNORD101	1.61e-05	1	1	2	0.0100633	FALSE
ENST00000578844	NR_039970	MIR5095	1.61e-05	1	3	2	1	FALSE
ENST00000356208,ENST00000440234,ENST00000342690,ENST00000344785,ENST00000371219	NM_017495,NM_183425,NM_001105312,NM_001206023,NM_001257471	RBM38	1.61e-05	1	0	1	0.00032138	FALSE
ENST00000294599,ENST00000356575,ENST00000494257,ENST00000485002,ENST00000491842,ENST00000475790,ENST00000461795	NM_001409	MEGF6	1.7e-05	20	58	2	1	FALSE
ENST00000438423,ENST00000267811,ENST00000452095,ENST00000560190,ENST00000559609,ENST00000558908,ENST00000333725,ENST00000557843,ENST00000557947,ENST00000561152,ENST00000569880,ENST00000561346,ENST00000559216,ENST00000560887,ENST00000561235,ENST00000560764,ENST00000543579,ENST00000537840,ENST00000343827,ENST00000559710,ENST00000560506,ENST00000559703,ENST00000561420,ENST00000558210,ENST00000561449…	NM_205375,NM_207037,NM_207040,NM_207036,NM_207038,NM_003205,NM_001077885	TCF12	1.7e-05	2	16	2	1	FALSE
ENST00000556788,ENST00000267485,ENST00000557175,ENST00000334342,ENST00000555101,ENST00000554218	NM_001001872	C14orf37	1.7e-05	0	1	1	1	FALSE
ENST00000445877,ENST00000325875	NM_125749,NM_001126014,NM_001031612,NM_024945,NM_001083765,NM_001183838,NM_001256939,NM_001258092	RMI1	1.8e-05	0	6	1	1	FALSE
ENST00000361757,ENST00000587024,ENST00000438103,ENST00000587673,ENST00000586109,ENST00000592222,ENST00000590446,ENST00000590998,ENST00000590176,ENST00000587655	NM_014963,NM_001100122,NM_001077911	SBNO2	1.8e-05	16	22	2	1	FALSE
ENST00000369983,ENST00000476019	NM_119837,NM_179179,NM_001111894,NM_001199378,NM_004193,NM_001199379,NM_001081600,NM_001250990	GBF1	1.8e-05	0	11	1	1	FALSE
ENST00000368694,ENST00000495554,ENST00000403433,ENST00000368690,ENST00000368687,ENST00000368686	NM_001243268,NM_015607,NM_001035481,NM_001206612,NM_001244664,NM_001266813	CHTOP	1.8e-05	0	5	1	9.77e-25	FALSE
ENST00000254193,ENST00000558036,ENST00000559309,ENST00000560307,ENST00000560433,ENST00000394082,ENST00000540017,ENST00000560496,ENST00000559686,ENST00000560383,ENST00000558059,ENST00000560987,ENST00000560856,ENST00000558020,ENST00000561187	NM_003090,NM_001098948,NM_001005823,NM_001260907	SNRPA1	1.8e-05	0	1	1	1.37e-05	FALSE
ENST00000381125,ENST00000495715,ENST00000381075,ENST00000421751,ENST00000407806,ENST00000415005,ENST00000468050,ENST00000460445,ENST00000413079,ENST00000381072,ENST00000433193	NM_001031511,NM_001133150,NM_002627,NM_001193220,NM_001082748,NM_001242339	PFKP	1.92e-05	7	19	2	1	FALSE
ENST00000217159,ENST00000497209,ENST00000370507,ENST00000470412,ENST00000495889,ENST00000466961,ENST00000451793,ENST00000497919,ENST00000466818	NM_001030856,NM_016354,NM_001192727	SLCO4A1	1.92e-05	3	7	2	1	FALSE
ENST00000406386,ENST00000344404,ENST00000492485,ENST00000407319,ENST00000403663,ENST00000428075,ENST00000413051,ENST00000418339,ENST00000452519,ENST00000417857,ENST00000331103	NM_007032,NM_001039141,NM_138632,NM_001206444	TRIOBP	1.92e-05	3	10	2	1	FALSE
ENST00000395395,ENST00000340911,ENST00000481550,ENST00000492115,ENST00000375354,ENST00000480716	NM_194320	ZNF169	1.92e-05	0	3	1	1	FALSE
ENST00000372307,ENST00000372306,ENST00000372310,ENST00000475075,ENST00000360584,ENST00000357730,ENST00000537678,ENST00000492434,ENST00000528803,ENST00000489764,ENST00000466926,ENST00000533007	NM_001031279,NM_201649,NM_006934,NM_001024845,NM_001102032,NM_001242342,NM_001242343,NM_001261380,NR_048549,NR_048548	SLC6A9	1.94e-05	4	18	2	1	FALSE
ENST00000548249,ENST00000537439,ENST00000543672,ENST00000434715,ENST00000550201,ENST00000549394,ENST00000546758,ENST00000550988,ENST00000552390,ENST00000550086,ENST00000550954,ENST00000551872,ENST00000548736,ENST00000546670,ENST00000551611,ENST00000546965,ENST00000550750,ENST00000548949,ENST00000551142,ENST00000547345,ENST00000551400,ENST00000550576,ENST00000547480,ENST00000546559,ENST00000549712	NM_204802,NM_001131270,NM_006400,NM_001034558,NM_001261412,NM_001261413	DCTN2	2.05e-05	0	5	1	1	FALSE
ENST00000423113,ENST00000396033,ENST00000302278,ENST00000374956,ENST00000488427,ENST00000494395,ENST00000484088,ENST00000480226,ENST00000474568,ENST00000488494,ENST00000534049,ENST00000437302,ENST00000475184,ENST00000528877,ENST00000417122,ENST00000464001,ENST00000493758,ENST00000472147,ENST00000414670,ENST00000439974	NM_001039254,NM_001131852,NM_133376,NM_002211,NM_033668,NM_001048160,NM_213968,NM_174368,NM_001113770	ITGB1	2.05e-05	7	11	2	1	FALSE
ENST00000374183,ENST00000462085	NM_017688,NM_001206723	BSPRY	2.05e-05	0	2	1	1	FALSE
ENST00000355451,ENST00000460110,ENST00000487118,ENST00000475952,ENST00000338427,ENST00000493613,ENST00000472246,ENST00000464812,ENST00000478769,ENST00000480209,ENST00000497978	NM_001133887,NM_015332,NM_001075997,NM_001266593	NUDCD3	2.17e-05	3	11	2	1	FALSE
ENST00000352482,ENST00000348257,ENST00000346249,ENST00000358548,ENST00000217121,ENST00000351424,ENST00000369927,ENST00000474176	NM_001030858,NM_001131740,NM_199359,NM_199360,NM_199361,NM_199362,NM_199363,NM_003288,NM_001034615,NM_001243891,NM_001243892,NM_001243894,NM_001243895,NR_045090	TPD52L2	2.17e-05	10	28	2	1	FALSE
ENST00000364113,ENST00000408221,ENST00000408792,ENST00000515969,ENST00000408712,ENST00000408166	NR_002580	SNORA3	2.17e-05	1	2	2	1	FALSE
ENST00000373087,ENST00000472312,ENST00000471012	NM_025079,NM_001102187	ZC3H12A	2.17e-05	4	10	2	1	FALSE
ENST00000445856,ENST00000272167,ENST00000448202,ENST00000366837,ENST00000467015	NM_001133316,NM_001136018,NM_000120,NM_214355,NM_001034629,NM_001082275,NM_001258087	EPHX1	2.17e-05	1	11	2	1	FALSE
ENST00000487500,ENST00000396467,ENST00000352983,ENST00000396466,ENST00000396465,ENST00000466821,ENST00000435330,ENST00000431653	NM_001006345,NM_001193556,NM_001132408,NM_000971,NM_001163864,NM_001113217,NM_001014928,NM_001159737,NM_001252227	RPL7	2.17e-05	1	0	1	1	FALSE
ENST00000375608,ENST00000442652,ENST00000442625,ENST00000397036,ENST00000375604,ENST00000397030,ENST00000535094,ENST00000421756,ENST00000375601,ENST00000433807,ENST00000434480,ENST00000409954,ENST00000423482,ENST00000375597,ENST00000486210,ENST00000397024,ENST00000486806,ENST00000473345,ENST00000480321,ENST00000469558,ENST00000397021,ENST00000494043,ENST00000423251,ENST00000464800,ENST00000475524…	NM_024979,NM_001112732,NM_001252063	MCF2L	2.17e-05	3	7	2	1	FALSE
UNKNOWN	NM_001124767	C3orf78	2.17e-05	2	0	1	0.000207327	FALSE
ENST00000262768,ENST00000536189,ENST00000585421,ENST00000586057,ENST00000592761	NM_204298,NM_003255,NM_001003082,NM_001145985,NM_174472,NM_001166186	TIMP2	2.17e-05	1	10	2	1	FALSE
ENST00000218104,ENST00000370129,ENST00000443684	NM_000033,NM_001046190,NM_001171362	ABCD1	2.17e-05	1	1	2	1	FALSE
ENST00000394413,ENST00000394414,ENST00000508545,ENST00000530902,ENST00000394411,ENST00000394410,ENST00000453001,ENST00000356826,ENST00000504198,ENST00000336640,ENST00000394409,ENST00000512639,ENST00000512984,ENST00000522831,ENST00000528601,ENST00000515880,ENST00000512011,ENST00000532154,ENST00000502876,ENST00000508267,ENST00000504565,ENST00000509721,ENST00000520231	NM_001133532,NM_181674,NM_181676,NM_181677,NM_001127381,NM_181675,NM_181678,NM_004576,NM_214025,NM_001014879,NM_001195718	PPP2R2B	2.17e-05	2	39	2	1	FALSE
ENST00000452143,ENST00000442679,ENST00000371146,ENST00000339950	NM_001031290,NM_003368,NM_001017415,NM_001017416,NM_001046224,NM_001250505	USP1	2.17e-05	1	4	2	1	FALSE
ENST00000492724,ENST00000492405,ENST00000488814,ENST00000489495,ENST00000474632,ENST00000480673,ENST00000483894,ENST00000294623,ENST00000370767,ENST00000370768,ENST00000436586,ENST00000487684,ENST00000470287,ENST00000421641	NM_001006535,NM_003902,NM_001076846	FUBP1	2.19e-05	1	6	2	1	FALSE
ENST00000555775,ENST00000554998,ENST00000402312,ENST00000335290,ENST00000554492,ENST00000554175,ENST00000557710,ENST00000542471,ENST00000555865,ENST00000557502,ENST00000555201	NM_001161476,NM_024515,NM_001206428	WDR25	2.19e-05	2	13	2	1	FALSE
ENST00000541920,ENST00000510410,ENST00000300441,ENST00000504945,ENST00000503408,ENST00000506582,ENST00000504392,ENST00000427954,ENST00000502667,ENST00000570356,ENST00000506052,ENST00000513101,ENST00000508245,ENST00000510262,ENST00000507769,ENST00000509806,ENST00000513544,ENST00000511288,ENST00000506085,ENST00000508734,ENST00000503387,ENST00000512119,ENST00000512537,ENST00000503295,ENST00000511147…	NM_001132466,NM_025149,NM_001078112,NM_001206973	ACSF2	2.19e-05	1	4	2	1	FALSE
ENST00000304425	NR_027054	MIR31HG	2.19e-05	5	30	2	1	FALSE
ENST00000399075,ENST00000504110	NM_001170330,NM_001001701	C4orf3	2.33e-05	0	2	1	2.17e-18	FALSE
ENST00000466801,ENST00000448874,ENST00000409321,ENST00000409115,ENST00000341369,ENST00000481928,ENST00000468027,ENST00000409683,ENST00000410064,ENST00000412128,ENST00000440384,ENST00000467816	NM_001132923,NM_001099285,NM_002823,NM_001160086,NM_001039953,NM_001244635,NM_001252198	PTMA	2.33e-05	0	1	1	1.1e-28	FALSE
ENST00000014914,ENST00000537783,ENST00000542056,ENST00000534831,ENST00000540125	NM_003979,NM_001034515	GPRC5A	2.33e-05	5	14	2	1	FALSE
ENST00000373509,ENST00000468243,ENST00000479509	NM_002648,NM_001146177,NM_001009322,NM_174144,NM_001146090,NM_001178262,NM_001243186	PIM1	2.33e-05	0	4	1	4.54e-12	FALSE
ENST00000386307	NR_002433	SNORD12C	2.48e-05	1	1	2	1	FALSE
ENST00000416691,ENST00000542266,ENST00000422759,ENST00000543804,ENST00000543790,ENST00000455146,ENST00000356576,ENST00000536488,ENST00000537156,ENST00000465775,ENST00000460701	NM_020751,NR_026745,NM_001145079,NM_001035069,NM_001182880	COG6	2.48e-05	0	3	1	1	FALSE
ENST00000409402,ENST00000410092,ENST00000309836,ENST00000440472,ENST00000453447,ENST00000498803,ENST00000464481,ENST00000592156,ENST00000588236,ENST00000383356,ENST00000487491,ENST00000449797,ENST00000497844,ENST00000462226	NM_020148,NM_001128626,NM_001128627	SPIRE1	2.48e-05	1	8	2	1	FALSE
ENST00000360911,ENST00000311275,ENST00000458360,ENST00000262975,ENST00000467200,ENST00000471951,ENST00000352431,ENST00000396281,ENST00000446994,ENST00000355972,ENST00000536340,ENST00000540497,ENST00000372023,ENST00000461685,ENST00000468376,ENST00000435836,ENST00000446894,ENST00000441977	NM_012408,NM_183047,NM_183048,NM_001191171,NM_001133575	ZMYND8	2.48e-05	2	13	2	1	FALSE
ENST00000245323	NM_204824,NM_004093,NM_001114296,NM_001114344,NM_001114943,NM_001114286	EFNB2	2.48e-05	0	2	1	1	FALSE
ENST00000467023,ENST00000485769,ENST00000340699,ENST00000420696,ENST00000401534,ENST00000540236,ENST00000367897,ENST00000559240,ENST00000498497,ENST00000559578,ENST00000560469,ENST00000496120,ENST00000468104,ENST00000560641,ENST00000474046,ENST00000482110,ENST00000558796,ENST00000558837,ENST00000559560,ENST00000540246,ENST00000465089	NM_204746,NM_001192768,NM_001204961,NM_001204963,NM_002585	PBX1	2.63e-05	4	44	2	0.016131	FALSE
ENST00000531468,ENST00000341398,ENST00000264025,ENST00000524429,ENST00000340882,ENST00000532197,ENST00000524510	NM_002855,NM_203286,NM_203285,NM_001001262,NM_001206022	PVRL1	2.63e-05	0	7	1	1	FALSE
ENST00000554922,ENST00000553973,ENST00000352093,ENST00000553526,ENST00000380664,ENST00000555823,ENST00000553320,ENST00000553281,ENST00000553962	NM_183387,NM_001206576	EML5	2.63e-05	0	3	1	0.0437092	FALSE
ENST00000355458,ENST00000496418,ENST00000264990,ENST00000545291,ENST00000485198,ENST00000469042,ENST00000510100,ENST00000477604,ENST00000507705,ENST00000487024,ENST00000481970,ENST00000489991	NM_001006367,NM_001132931,NM_032169,NM_001075893	ACAD11	2.63e-05	0	2	1	1	FALSE
ENST00000230895,ENST00000432074,ENST00000514882,ENST00000508253,ENST00000510546,ENST00000508646	NM_001031003,NM_004394,NM_001078058,NM_001257566	DAP	2.63e-05	2	14	2	1	FALSE
UNKNOWN	NR_037804	NPHP3-ACAD11	2.63e-05	1	5	2	1	FALSE
ENST00000369617,ENST00000307546,ENST00000369615,ENST00000369611,ENST00000486456,ENST00000477955	NM_001012697,NM_001142782,NM_152900,NM_001192746	MAGI3	2.63e-05	2	11	2	1	FALSE
ENST00000371733,ENST00000371730,ENST00000396122,ENST00000486505,ENST00000478657,ENST00000493793,ENST00000371727,ENST00000464478,ENST00000471391,ENST00000465467	NM_001031283,NM_001981,NM_001159969,NM_001098087	EPS15	2.8e-05	0	3	1	1	FALSE
ENST00000202028,ENST00000432589,ENST00000406771,ENST00000430276,ENST00000373950,ENST00000452261,ENST00000447825,ENST00000441639,ENST00000427533,ENST00000373946,ENST00000373945,ENST00000338074,ENST00000373941,ENST00000451082,ENST00000454226,ENST00000479336,ENST00000432603	NM_001133828,NM_177996,NM_012156,NM_001258329,NM_001258331,NM_001258330	EPB41L1	2.91e-05	11	34	2	1	FALSE
ENST00000221566,ENST00000591984,ENST00000589251,ENST00000587866,ENST00000586711	NM_001031379,NM_001194732,NM_003021,NM_001038030,NM_001244392	SGTA	2.91e-05	1	4	2	1	FALSE
ENST00000311507,ENST00000411416,ENST00000509973,ENST00000515389,ENST00000505406,ENST00000426923	NM_001131361,NM_016619,NM_001130715,NM_001130716,NM_001025325,NM_001076987,NM_001258163	PLAC8	2.91e-05	3	8	2	1	FALSE
ENST00000256646,ENST00000493703,ENST00000478864,ENST00000479412,ENST00000602566,ENST00000489731	NM_001200001,NM_024408,NM_001252033,NM_001260662	NOTCH2	2.91e-05	2	11	2	1	FALSE
ENST00000398842,ENST00000398809,ENST00000461841,ENST00000299366,ENST00000224721,ENST00000466757,ENST00000470494,ENST00000442677,ENST00000398792,ENST00000398788,ENST00000475158	NM_022124,NM_052836,NM_001171930,NM_001171931,NM_001171932,NM_001171933,NM_001171934,NM_001171935,NM_001171936,NM_001191206	CDH23	2.91e-05	1	12	2	1	FALSE
ENST00000420436,ENST00000491604,ENST00000357068,ENST00000334029,ENST00000482858,ENST00000429300,ENST00000313755,ENST00000446371,ENST00000438924,ENST00000399694,ENST00000450579,ENST00000457083,ENST00000496625	NM_001195226,NM_016335,NM_001075185	PRODH	2.91e-05	1	5	2	1	FALSE
ENST00000460467,ENST00000396755,ENST00000418129,ENST00000432376,ENST00000419842	NM_015184,NM_001144382,NM_001192255	PLCL2	2.91e-05	5	28	2	1	FALSE
ENST00000373624,ENST00000473039,ENST00000542603,ENST00000394219,ENST00000373620,ENST00000475421,ENST00000394215,ENST00000491650,ENST00000497135,ENST00000373618,ENST00000479305,ENST00000462245,ENST00000474676,ENST00000475615	NM_001030679,NM_001193014,NM_020946,NM_024820	DENND1A	2.91e-05	2	23	2	1	FALSE
ENST00000293328,ENST00000498674,ENST00000481253,ENST00000468496,ENST00000481517,ENST00000468312,ENST00000415845	NM_204779,NM_012448,NM_214168,NM_174617	STAT5B	2.91e-05	5	16	2	1	FALSE
ENST00000562370,ENST00000567216,ENST00000568988,ENST00000219611,ENST00000568402,ENST00000565010,ENST00000566977	NM_005632	SOLH	2.91e-05	9	11	2	1	FALSE
ENST00000537526,ENST00000261497,ENST00000455117,ENST00000579645,ENST00000463692,ENST00000478443,ENST00000582335,ENST00000577610,ENST00000578446,ENST00000476111,ENST00000584538	NM_015276,NM_001166567	USP22	2.91e-05	2	14	2	1	FALSE
ENST00000375238,ENST00000246190,ENST00000477778,ENST00000488489,ENST00000483813,ENST00000485399,ENST00000485976,ENST00000478237,ENST00000494174,ENST00000463246,ENST00000480994,ENST00000439478,ENST00000498353,ENST00000493590,ENST00000473892,ENST00000484824	NM_001030850,NM_031232,NM_031231,NM_001081589	NECAB3	2.91e-05	5	18	2	1	FALSE
ENST00000360151,ENST00000543801,ENST00000432570,ENST00000534094,ENST00000458669,ENST00000540039,ENST00000536260,ENST00000541915,ENST00000537112,ENST00000537085,ENST00000381497,ENST00000538085,ENST00000534258,ENST00000541593,ENST00000331436,ENST00000535961,ENST00000524823,ENST00000283050,ENST00000527703,ENST00000545114,ENST00000427999,ENST00000541810,ENST00000531453,ENST00000528301,ENST00000526166…	NR_036447	PKD1P1	2.91e-05	2	13	2	1	FALSE
ENST00000272102,ENST00000540651,ENST00000477821,ENST00000470670,ENST00000478424,ENST00000470558,ENST00000473949,ENST00000477451,ENST00000478336,ENST00000469235,ENST00000541182,ENST00000473546,ENST00000482962,ENST00000497165,ENST00000490705	NM_102198,NM_001036131,NM_104668,NM_179499,NM_001006352,NM_001193287,NM_001658,NM_001024228,NM_001024226,NM_001024227,NM_001160427,NM_176653,NM_001162544,NM_001180252,NM_001198337,NM_001246996,NM_001251927	ARF1	2.91e-05	4	7	2	1	FALSE
ENST00000281017,ENST00000432667,ENST00000355654,ENST00000497508,ENST00000477202,ENST00000405941,ENST00000418447,ENST00000461640	NM_001012698,NM_152834,NM_001034793	TMEM18	2.91e-05	1	2	2	1	FALSE
ENST00000381809,ENST00000359883,ENST00000447596	NM_111068,NM_001133574,NM_001133752,NM_001199853,NM_001199856,NM_016282,NM_001199852,NM_001199855,NM_174237,NM_001266135	AK3	2.91e-05	3	10	2	1	FALSE
ENST00000472028,ENST00000477912,ENST00000478609,ENST00000490337,ENST00000389636,ENST00000471742,ENST00000475456,ENST00000302490,ENST00000389634,ENST00000489036,ENST00000476362,ENST00000461717,ENST00000497291,ENST00000496923	NM_204906,NM_172159,NM_172160,NM_003471,NM_001105294,NM_001025336,NM_001170956,NM_001260716	KCNAB1	2.91e-05	1	1	2	1	FALSE
ENST00000512386,ENST00000282605,ENST00000515554,ENST00000361895,ENST00000402835,ENST00000395003,ENST00000431355,ENST00000453515,ENST00000470876,ENST00000430087	NM_015288	PHF15	2.91e-05	2	8	2	1	FALSE
ENST00000480820,ENST00000494002,ENST00000295930,ENST00000471994,ENST00000464171,ENST00000312179,ENST00000475278,ENST00000480119,ENST00000468344,ENST00000471911,ENST00000476899,ENST00000477788,ENST00000482822,ENST00000496268	NM_016625,NM_001075404,NM_001266753	RSRC1	2.98e-05	1	10	2	1	FALSE
ENST00000411948,ENST00000366528,ENST00000391839,ENST00000498262,ENST00000464757	NM_198076,NM_001040585,NM_001180539,NM_001257785	COX20	2.98e-05	0	6	1	0.000113377	FALSE
ENST00000455089,ENST00000342916,ENST00000344576,ENST00000420316,ENST00000275493,ENST00000442591,ENST00000459688,ENST00000463948,ENST00000450046,ENST00000454757,ENST00000485503	NM_205497,NM_201282,NM_201283,NM_201284,NM_005228,NM_214007	EGFR	2.98e-05	9	84	2	1	FALSE
ENST00000521654,ENST00000560949,ENST00000519971,ENST00000519565,ENST00000454842,ENST00000368414,ENST00000519799,ENST00000359704,ENST00000432158,ENST00000368415,ENST00000275184	NM_152553	RNF217	2.98e-05	0	1	1	1	FALSE
UNKNOWN	NM_015229	KIAA0664	2.98e-05	1	11	2	1	FALSE
ENST00000549318,ENST00000547423,ENST00000548360,ENST00000546466,ENST00000546937,ENST00000273308,ENST00000553191,ENST00000551475,ENST00000551286,ENST00000551720,ENST00000551276,ENST00000548013,ENST00000547570,ENST00000553164,ENST00000546388	NM_014255,NM_001190991,NM_001185068,NM_001075267	CNPY2	2.98e-05	0	3	1	1	FALSE
ENST00000283147	NM_001718,NM_001168001	BMP6	3.17e-05	3	38	2	1	FALSE
ENST00000382751,ENST00000480196,ENST00000492603	NM_014825,NM_001179580,NM_001205980	URB1	3.17e-05	8	27	2	1	FALSE
ENST00000382592,ENST00000542899,ENST00000472754	NM_014572,NM_001177919	LATS2	3.17e-05	2	9	2	1	FALSE
ENST00000367321,ENST00000367307,ENST00000367308,ENST00000441122,ENST00000423867,ENST00000443074,ENST00000425276,ENST00000421497,ENST00000478643,ENST00000420192,ENST00000453602,ENST00000450635	NM_015440,NM_001076018,NM_001242767,NM_001242768,NM_001242769	MTHFD1L	3.17e-05	3	23	2	1	FALSE
ENST00000430027,ENST00000431497,ENST00000452769,ENST00000437331,ENST00000430404,ENST00000458352,ENST00000437541	NR_015448	DLX6-AS1	3.17e-05	1	2	2	0.0254545	FALSE
ENST00000261336,ENST00000381997,ENST00000535230,ENST00000539983,ENST00000546197,ENST00000540995,ENST00000543108,ENST00000546116	NM_002864	PZP	3.17e-05	1	12	2	1	FALSE
ENST00000372715,ENST00000483181,ENST00000480613,ENST00000473486,ENST00000451652,ENST00000419989	NM_001131776,NM_052844,NM_001206205	WDR34	3.17e-05	0	4	1	1	FALSE
ENST00000391069,ENST00000384762	NR_002978	SNORA46	3.39e-05	0	2	1	1	FALSE
ENST00000300006,ENST00000566490,ENST00000570249,ENST00000561813,ENST00000567550,ENST00000452191,ENST00000564389,ENST00000561692,ENST00000563380,ENST00000565857,ENST00000565913	NM_001134221,NM_033201,NM_001142469	C16orf45	3.39e-05	0	10	1	1	FALSE
ENST00000317147,ENST00000563130,ENST00000245138,ENST00000569240,ENST00000567188,ENST00000569924,ENST00000570139,ENST00000568917,ENST00000563283,ENST00000566240,ENST00000441024,ENST00000567133,ENST00000567285,ENST00000569732,ENST00000562046,ENST00000569882,ENST00000565605,ENST00000564557,ENST00000569916,ENST00000565697,ENST00000569020,ENST00000568158,ENST00000569263	NM_206999,NM_016284,NM_001206039,NM_001265612,NR_049763	CNOT1	3.39e-05	0	6	1	1	FALSE
ENST00000358701,ENST00000455222	NM_126188,NM_181701	QSOX2	3.39e-05	1	5	2	1	FALSE
ENST00000264993,ENST00000431519,ENST00000503932,ENST00000508481,ENST00000420115,ENST00000504867,ENST00000511392,ENST00000507408,ENST00000515421	NM_001030990,NM_001134423,NM_001134422,NM_017548,NM_001192040	CDV3	3.39e-05	0	2	1	1.85e-22	FALSE
ENST00000361822,ENST00000361946,ENST00000457808,ENST00000421043,ENST00000425229,ENST00000450657,ENST00000421864	NM_001195469,NM_021994,NM_001083395	ZNF277	3.5e-05	1	4	2	1	FALSE
ENST00000513610,ENST00000274203,ENST00000515803,ENST00000427430,ENST00000505695,ENST00000513882,ENST00000506343,ENST00000512061,ENST00000510401,ENST00000508318,ENST00000511972,ENST00000502436,ENST00000507288	NM_012334,NM_174394	MYO10	3.6e-05	7	16	2	1	FALSE
ENST00000281701,ENST00000391875,ENST00000469968,ENST00000489194,ENST00000493060,ENST00000483094,ENST00000481213,ENST00000469075,ENST00000340871,ENST00000482491,ENST00000496393,ENST00000361463,ENST00000462893,ENST00000467882,ENST00000492281,ENST00000488718,ENST00000436927,ENST00000470989,ENST00000470903,ENST00000461466,ENST00000498767,ENST00000461546,ENST00000468673,ENST00000487758,ENST00000468088	NM_100703,NM_001243147,NM_001243146,NM_001079576,NM_002533,NM_206840	NVL	3.6e-05	1	4	2	1	FALSE
ENST00000485560,ENST00000395867,ENST00000494133,ENST00000374648,ENST00000357328,ENST00000395873,ENST00000395874	NM_021045,NM_001131339,NM_001191482,NM_001267597,NM_001267605,NM_001267606,NM_001267607	ZNF248	3.6e-05	0	4	1	1	FALSE
ENST00000461361,ENST00000477865,ENST00000482004,ENST00000265564,ENST00000468667,ENST00000467846,ENST00000491476,ENST00000481405,ENST00000498168,ENST00000486727,ENST00000459856	NR_023353,NM_015004,NM_001243824,NM_001251892,NM_001252154	EXOSC7	3.6e-05	0	4	1	0.000879887	FALSE
ENST00000379882,ENST00000379883,ENST00000379868,ENST00000542096,ENST00000545044	NM_001042668,NM_014314,NM_213804	DDX58	3.6e-05	0	2	1	1	FALSE
ENST00000484291,ENST00000367943,ENST00000464004,ENST00000490591,ENST00000463365	NM_007240	DUSP12	3.6e-05	0	1	1	1	FALSE
ENST00000516624,ENST00000517111,ENST00000516728,ENST00000517079,ENST00000516029,ENST00000517242,ENST00000362607,ENST00000517250,ENST00000516049,ENST00000516540,ENST00000516429,ENST00000516287,ENST00000517180,ENST00000516953,ENST00000516327,ENST00000517204,ENST00000516019,ENST00000516528,ENST00000516190,ENST00000515993,ENST00000517219,ENST00000517043,ENST00000516771,ENST00000517232,ENST00000516773…	NR_002967	SNORA31	3.67e-05	0	1	1	1	FALSE
ENST00000379056,ENST00000528619,ENST00000529421,ENST00000484604,ENST00000490277,ENST00000533567,ENST00000530705,ENST00000530245,ENST00000379060,ENST00000379055,ENST00000309246,ENST00000527226,ENST00000442760	NM_205398,NM_001098546,NM_003295,NM_001014388,NM_001082129,NM_001183356,NM_001266379	TPT1	3.67e-05	0	1	1	1	FALSE
ENST00000381482,ENST00000246032,ENST00000493263,ENST00000400064	NM_080836,NM_001113768	STK35	3.84e-05	0	4	1	1	FALSE
ENST00000373731,ENST00000483557,ENST00000443316,ENST00000474988,ENST00000498267,ENST00000544295,ENST00000481911,ENST00000449081,ENST00000536244,ENST00000265344,ENST00000460983	NM_173562,NM_001101093,NM_001257899	KCTD20	3.84e-05	0	7	1	1	FALSE
ENST00000491329,ENST00000482228,ENST00000481679,ENST00000478624,ENST00000495900,ENST00000434257,ENST00000489729,ENST00000454872,ENST00000485853,ENST00000473253,ENST00000489299,ENST00000414826	NM_207015	NAALADL2	3.84e-05	1	1	2	1	FALSE
ENST00000535300,ENST00000496055,ENST00000319942,ENST00000485459,ENST00000473406,ENST00000370826,ENST00000497648,ENST00000462042,ENST00000470201,ENST00000471759,ENST00000491266,ENST00000461653,ENST00000489450,ENST00000467748,ENST00000459697	NM_004582,NM_001015646,NM_001161868,NM_001261560	RABGGTB	3.84e-05	0	4	1	1	FALSE
ENST00000377636,ENST00000425511,ENST00000377625,ENST00000431480,ENST00000478591,ENST00000493487,ENST00000413735,ENST00000488955	NM_001172423,NM_014832,NM_001206310	TBC1D4	3.84e-05	0	10	1	1	FALSE
ENST00000486542,ENST00000396900,ENST00000341083,ENST00000440282,ENST00000396898,ENST00000378605,ENST00000480703,ENST00000463303,ENST00000469555,ENST00000492675,ENST00000466271	NM_152751,NM_001100912	BEND7	3.84e-05	0	3	1	1	FALSE
ENST00000588915,ENST00000262291,ENST00000537567,ENST00000593168,ENST00000539763,ENST00000586245,ENST00000585847,ENST00000587945,ENST00000536180,ENST00000588131,ENST00000589823,ENST00000592106,ENST00000591315,ENST00000545362,ENST00000587259,ENST00000592619,ENST00000591877,ENST00000591782,ENST00000588617,ENST00000592790,ENST00000587470	NM_001132442,NM_030938,NM_001075368,NM_001190897,NM_001242611	VMP1	3.89e-05	1	4	2	1	FALSE
ENST00000517997,ENST00000517479,ENST00000457458,ENST00000522883,ENST00000520295,ENST00000357227,ENST00000519758,ENST00000520893,ENST00000517426,ENST00000522234,ENST00000518391,ENST00000428400,ENST00000518022,ENST00000276052,ENST00000523034,ENST00000523344,ENST00000523699,ENST00000523543,ENST00000493213,ENST00000462827,ENST00000520141,ENST00000462483	NM_006201,NM_033018,NM_001170460,NM_001101226	CDK16	3.89e-05	2	3	2	1	FALSE
ENST00000426789,ENST00000360110,ENST00000420415,ENST00000540528,ENST00000392396,ENST00000535031,ENST00000463047,ENST00000475593,ENST00000483983,ENST00000463356,ENST00000482479,ENST00000465288,ENST00000477148,ENST00000464368,ENST00000491658,ENST00000421258,ENST00000464011	NM_205256,NM_001131591,NM_003234,NM_001128148,NM_001003111,NM_001009312,NM_001081913,NM_214001,NM_001206577,NM_001257303	TFRC	3.89e-05	7	21	2	1	FALSE
ENST00000280379,ENST00000393630,ENST00000393632,ENST00000546600,ENST00000549378,ENST00000393629,ENST00000552738,ENST00000547095,ENST00000552115,ENST00000549286,ENST00000551307,ENST00000547287,ENST00000549539,ENST00000546751,ENST00000551397	NM_001199605,NM_015026,NM_001183135	MON2	3.89e-05	1	8	2	1	FALSE
ENST00000368533,ENST00000368545,ENST00000469717,ENST00000341485,ENST00000330188,ENST00000341372,ENST00000328159,ENST00000509409,ENST00000271850,ENST00000312970,ENST00000513769,ENST00000302206,ENST00000368531,ENST00000323144,ENST00000368530,ENST00000504663,ENST00000509601,ENST00000505010,ENST00000368527,ENST00000473036,ENST00000466010,ENST00000515609	NM_001133522,NM_153649,NM_152263,NM_001043351,NM_001043352,NM_001043353,NM_001001632,NM_001011674,NM_001245927,NM_001252211,NM_001257843	TPM3	3.89e-05	2	7	2	1	FALSE
UNKNOWN	NR_024187	SUZ12P1	3.89e-05	3	11	2	1	FALSE
ENST00000455354,ENST00000444046,ENST00000422749,ENST00000427451	NR_038896,NR_038898,NR_038899,NR_038900	DSCAM-AS1	3.89e-05	2	3	2	1	FALSE
ENST00000376462,ENST00000481700,ENST00000458595,ENST00000376456,ENST00000376454,ENST00000376452,ENST00000438429,ENST00000430453,ENST00000307544,ENST00000376451,ENST00000396445,ENST00000396446,ENST00000460373,ENST00000492009	NM_001098500,NM_001098501,NM_019590	KIAA1217	3.89e-05	1	1	2	1	FALSE
ENST00000317734,ENST00000243896,ENST00000372230,ENST00000372229,ENST00000372227,ENST00000493599,ENST00000543605,ENST00000480329,ENST00000487729,ENST00000484318,ENST00000481809,ENST00000420518,ENST00000424568,ENST00000484188	NM_001030865,NM_173073,NM_173179,NM_015945,NM_001185159,NM_001046174	SLC35C2	3.89e-05	3	6	2	0.0174729	FALSE
ENST00000370110,ENST00000474993,ENST00000462391,ENST00000468544	NM_001194502,NM_001131894,NM_006993,NM_001205560	NPM3	3.89e-05	1	0	1	1.23e-20	FALSE
ENST00000432321,ENST00000313468,ENST00000531796,ENST00000453471,ENST00000526446,ENST00000528492,ENST00000532399,ENST00000526339,ENST00000531228,ENST00000525419,ENST00000525628,ENST00000529645,ENST00000524810,ENST00000526542,ENST00000531282	NM_001071780,NM_001131881,NM_002496,NM_174818,NM_001252295,NM_001266182	NDUFS8	3.89e-05	4	3	2	1	FALSE
ENST00000313833,ENST00000554940,ENST00000440021,ENST00000555087,ENST00000557647,ENST00000556920,ENST00000555280	NM_001031213,NM_017943,NM_152231,NM_001081611,NM_001258439,NM_001266246	FBXO34	3.89e-05	2	6	2	1	FALSE
ENST00000162749,ENST00000534885,ENST00000536717,ENST00000543995,ENST00000540022,ENST00000543359,ENST00000537842,ENST00000535038,ENST00000539372,ENST00000366159,ENST00000437813,ENST00000543048,ENST00000440083,ENST00000536194,ENST00000535958,ENST00000538363	NM_001030779,NM_001065,NM_001009361,NM_213969,NM_174674,NM_001166185	TNFRSF1A	3.89e-05	3	5	2	1	FALSE
ENST00000449289,ENST00000430245,ENST00000436656,ENST00000431268,ENST00000412059,ENST00000450589,ENST00000452197,ENST00000456812,ENST00000436285,ENST00000448718,ENST00000414075,ENST00000422183,ENST00000454813,ENST00000422207,ENST00000454068,ENST00000444470,ENST00000434796,ENST00000449589,ENST00000422008,ENST00000442067,ENST00000455838,ENST00000416952,ENST00000456293,ENST00000443799,ENST00000451607…	NR_002578,NM_001183284	GAS5	3.89e-05	4	4	2	1	FALSE
ENST00000471502,ENST00000371663,ENST00000371671,ENST00000484471,ENST00000311502,ENST00000357466,ENST00000464941,ENST00000432842,ENST00000436380,ENST00000371675,ENST00000425121,ENST00000466096,ENST00000461992,ENST00000435930	NM_024718,NM_001173988,NM_001173989,NM_001076817	RABL6	3.89e-05	13	12	2	1	FALSE
ENST00000540480,ENST00000537664,ENST00000366751,ENST00000476287,ENST00000252510,ENST00000467012,ENST00000496635	NM_032448,NM_001102507	FAM120B	3.89e-05	3	11	2	1	FALSE
ENST00000430069,ENST00000474363,ENST00000457928,ENST00000428970,ENST00000424913,ENST00000352800,ENST00000431421,ENST00000437738,ENST00000450267,ENST00000431674,ENST00000422066,ENST00000443315,ENST00000422442,ENST00000427349,ENST00000413084,ENST00000491623	NM_001031369,NM_024665,NM_001193029,NM_001252610	TBL1XR1	3.89e-05	6	14	2	1	FALSE
ENST00000408573	NR_002435	SNORD100	3.89e-05	1	0	1	1	FALSE
ENST00000422514,ENST00000582736,ENST00000496182,ENST00000394938,ENST00000394935,ENST00000355731,ENST00000472628,ENST00000578181,ENST00000580755	NM_001193565,NM_000984,NM_001045958,NM_001177677,NM_001178327,NM_001205224	RPL23A	3.89e-05	2	3	2	1	FALSE
ENST00000545643,ENST00000537760,ENST00000414023,ENST00000529237,ENST00000256196,ENST00000534746,ENST00000526063,ENST00000532814,ENST00000531807,ENST00000532950,ENST00000531421,ENST00000526717	NM_001006466,NM_012250,NM_001102669,NM_001177314,NM_001177315,NM_001099010,NM_001260560	RRAS2	3.89e-05	3	5	2	1	FALSE
ENST00000354329,ENST00000529578,ENST00000533112,ENST00000531253,ENST00000527372,ENST00000530254,ENST00000546105,ENST00000532867,ENST00000527312,ENST00000531438,ENST00000531892,ENST00000529889,ENST00000530557,ENST00000533652,ENST00000532143,ENST00000533399,ENST00000588791,ENST00000590242,ENST00000528564,ENST00000528322,ENST00000585573,ENST00000531267,ENST00000533420,ENST00000590565	NM_078471,NM_203318	MYO18A	3.89e-05	4	12	2	1	FALSE
ENST00000352178,ENST00000359624,ENST00000398165,ENST00000398158,ENST00000461686,ENST00000398168,ENST00000544202,ENST00000451248,ENST00000462349,ENST00000491776,ENST00000458223,ENST00000430013,ENST00000496485,ENST00000486098,ENST00000441030,ENST00000470912,ENST00000465732,ENST00000488526,ENST00000478709	NM_000071,NM_001178008,NM_001178009,NM_001102000,NM_001082082	CBS	3.89e-05	8	12	2	1	FALSE
ENST00000400454,ENST00000404019	NM_001389	DSCAM	3.89e-05	2	3	2	1	FALSE
ENST00000431794,ENST00000586908,ENST00000591794,ENST00000268852,ENST00000588377,ENST00000593275,ENST00000592110,ENST00000590233,ENST00000586328,ENST00000593222,ENST00000591477,ENST00000592735,ENST00000588727,ENST00000588471,ENST00000591017,ENST00000587389,ENST00000590585,ENST00000586007,ENST00000544606,ENST00000585719,ENST00000589404,ENST00000586886,ENST00000585818,ENST00000588664,ENST00000592380…	NM_001033580,NM_025109,NM_001163735,NM_001024501	MYO19	4.08e-05	5	21	2	1	FALSE
ENST00000222139,ENST00000592375,ENST00000588681,ENST00000591958,ENST00000588859,ENST00000586890,ENST00000590927,ENST00000589402	NM_000121,NR_033663,NM_001048111,NM_214292,NM_001205601	EPOR	4.08e-05	0	3	1	1	FALSE
ENST00000516318,ENST00000517160,ENST00000383910,ENST00000517233,ENST00000516084,ENST00000365075,ENST00000364506,ENST00000516717,ENST00000365519,ENST00000516848,ENST00000516449,ENST00000363367,ENST00000517218,ENST00000384544,ENST00000516390,ENST00000384370,ENST00000365509,ENST00000516205,ENST00000384231,ENST00000384182,ENST00000384159,ENST00000383934,ENST00000384515,ENST00000516696,ENST00000516915…	NR_000011	SNORA70	4.08e-05	0	3	1	1	FALSE
ENST00000479870,ENST00000355951,ENST00000392900,ENST00000460532,ENST00000491908,ENST00000478172,ENST00000485416	NM_001132598,NM_014719,NM_001099054,NM_001206941,NM_001206938	FAM115A	4.08e-05	0	10	1	0.00431684	FALSE
ENST00000541953,ENST00000266546,ENST00000541667,ENST00000545663,ENST00000535452,ENST00000534830,ENST00000539982,ENST00000537408,ENST00000538933,ENST00000540931,ENST00000535668,ENST00000544584,ENST00000541770,ENST00000542663,ENST00000331148,ENST00000535313	NM_001133955,NM_014718,NM_001075425,NM_001261142	CLSTN3	4.08e-05	0	5	1	3.57e-13	FALSE
ENST00000355413,ENST00000473247,ENST00000535825,ENST00000495028,ENST00000473884,ENST00000494688,ENST00000492693,ENST00000465241,ENST00000496784,ENST00000496273,ENST00000494053	NM_001131400,NM_018238,NM_001143699,NM_001098969,NM_001260561	AGK	4.08e-05	0	7	1	1	FALSE
ENST00000474786,ENST00000369817,ENST00000479366,ENST00000424325,ENST00000436473,ENST00000344746,ENST00000491035,ENST00000489200,ENST00000458500,ENST00000485196,ENST00000482732,ENST00000492572,ENST00000467168,ENST00000406022,ENST00000451365,ENST00000428169,ENST00000427682,ENST00000449494	NM_001193559,NM_001168802,NM_001132532,NM_006013,NM_001044543,NM_174760,NM_001112820,NM_001171374,NM_001181962,NM_001256577,NM_001256580	RPL10	4.08e-05	0	3	1	1	FALSE
ENST00000588212	NM_001083335,NM_013380	ZFP112	4.36e-05	0	1	1	1	FALSE
ENST00000288670,ENST00000492942,ENST00000475377,ENST00000497192	NM_052905,NM_001206821	FMNL2	4.36e-05	4	24	2	1	FALSE
ENST00000360507,ENST00000409789,ENST00000453038,ENST00000451647	NM_001039307,NM_001194773,NM_001133422,NM_015680,NM_001015538	CNPPD1	4.36e-05	0	1	1	2.46e-10	FALSE
ENST00000256413,ENST00000382998,ENST00000591412,ENST00000591387,ENST00000587752,ENST00000588345,ENST00000589585,ENST00000587769,ENST00000587860,ENST00000592658,ENST00000590422	NM_014772,NM_001142397	CTIF	4.36e-05	4	17	2	0.0214048	FALSE
ENST00000395965,ENST00000505869,ENST00000509739,ENST00000509163,ENST00000502503,ENST00000511139,ENST00000510445,ENST00000506398,ENST00000504768	NM_001006574,NM_001193887,NM_032042,NM_001163417,NR_028080,NM_001163418	FAM172A	4.62e-05	1	29	2	1	FALSE
ENST00000382582,ENST00000355994,ENST00000490319,ENST00000585201,ENST00000397866,ENST00000397875,ENST00000397865,ENST00000527041,ENST00000359645,ENST00000528160,ENST00000577755,ENST00000527975,ENST00000578715,ENST00000397869,ENST00000354542,ENST00000531144,ENST00000583474,ENST00000533278,ENST00000526111,ENST00000579129,ENST00000580402,ENST00000578193,ENST00000397868,ENST00000447114,ENST00000580473…	NM_001243070,NM_205280,NM_001133619,NM_001135815,NM_001025090,NM_002385,NM_001025081,NM_001025092,NM_001025100,NM_001025101,NM_001001546,NM_001206674	MBP	4.62e-05	1	13	2	1	FALSE
ENST00000394426,ENST00000425354,ENST00000327550,ENST00000338561,ENST00000543726,ENST00000543762,ENST00000550265,ENST00000548317,ENST00000551580,ENST00000548284,ENST00000546717,ENST00000551158,ENST00000550362,ENST00000550721,ENST00000550350,ENST00000551501,ENST00000546377,ENST00000549859,ENST00000552901	NM_001130756,NM_000966,NM_001042728,NM_001243730,NM_001243731,NM_001243732	RARG	4.62e-05	0	2	1	3.49e-08	FALSE
ENST00000264639,ENST00000541736,ENST00000415039,ENST00000540504,ENST00000580980,ENST00000485835	NM_001031362,NM_002809,NM_001045900,NM_001246642,NM_001260856	PSMD3	4.62e-05	0	4	1	1	FALSE
ENST00000361962,ENST00000318588,ENST00000421587,ENST00000378163,ENST00000378179,ENST00000378168,ENST00000378158,ENST00000378166,ENST00000442742,ENST00000472704,ENST00000378154,ENST00000469265,ENST00000486402,ENST00000468986,ENST00000477823	NM_003688,NM_001126054,NM_001126055,NM_001102481,NM_079717,NM_001104393,NM_001104392,NM_169971,NM_169970,NM_001170210,NM_001261010	CASK	4.62e-05	1	7	2	1	FALSE
ENST00000426496,ENST00000392078,ENST00000367742,ENST00000476522,ENST00000338920,ENST00000467601,ENST00000463586,ENST00000480806,ENST00000470689,ENST00000495585,ENST00000498596,ENST00000492811	NM_015172,NM_001206655	PRRC2C	4.62e-05	1	10	2	1	FALSE
ENST00000525967,ENST00000525817,ENST00000356091,ENST00000529976,ENST00000527587,ENST00000533788,ENST00000527081,ENST00000525068,ENST00000532531	NM_001123148,NM_001034297,NM_001204872,NM_001204873,NM_024663	NPEPL1	4.93e-05	0	2	1	0.00418349	FALSE
ENST00000583610,ENST00000264658,ENST00000394294,ENST00000577399,ENST00000581781	NM_032875,NM_001184906,NM_001035096	FBXL20	4.93e-05	0	6	1	1	FALSE
ENST00000523519,ENST00000520578,ENST00000394123,ENST00000543466,ENST00000522761,ENST00000356245,ENST00000519832,ENST00000518726,ENST00000520177,ENST00000522367,ENST00000517947,ENST00000507878,ENST00000520006,ENST00000522666	NM_001006150,NM_001132090,NM_005754,NM_198395,NM_001037611,NM_001205405,NM_001261742	G3BP1	4.93e-05	0	5	1	0.0108048	FALSE
ENST00000334186,ENST00000602655,ENST00000602509,ENST00000602351,ENST00000602492,ENST00000602716,ENST00000421230,ENST00000602726,ENST00000602848,ENST00000602800,ENST00000602897,ENST00000602905,ENST00000602783	NM_003660	PPFIA3	4.93e-05	0	3	1	1.47e-07	FALSE
ENST00000460015,ENST00000449347,ENST00000263734,ENST00000467888,ENST00000475822,ENST00000463191,ENST00000483692,ENST00000466465,ENST00000465318,ENST00000468530	NM_204807,NM_001430,NM_001097420,NM_174725	EPAS1	4.93e-05	2	15	2	1	FALSE
[truncated: 10,460 more rows]
